# Supplementary material for: Synthesis of 4′-Thionucleoside Analogues Bearing a C2′ Stereogenic All-Carbon Quaternary Center
Source: MDPI journal article supplement (doi:10.3390/molecules29071647), 2024-04-06

## Synthesis of 4'-Thionucleoside Analogues Bearing a C2' Stereogenic All-Carbon Quaternary Center

Carla Eymard <sup>1,2</sup>, Amarender Manchoju <sup>1</sup>, Abir Almazloum <sup>3</sup>, Starr Dostie <sup>1</sup>, Michel Prévost <sup>1,\*</sup>, Mona Nemer <sup>3</sup>, and Yvan Guindon <sup>1,2,3,\*</sup>

<sup>1</sup> Bioorganic Chemistry Laboratory, Institut de recherches cliniques de Montréal (IRCM), Montréal, Québec, H2W 1R7, Canada;

<sup>2</sup> Department of Chemistry, Université de Montréal, Montréal, Québec, H3C 3J7, Canada

<sup>3</sup> Department of Biochemistry, Microbiology and Immunology, University of Ottawa, Ottawa, Ontario, K1N 6N5, Canada

\* Correspondence: michel.prevast@ircm.qc.ca (M.P.); yvan.guindon@ircm.qc.ca (Y.G.)

**Part I.** Stereochemical Proofs.....S2

**Part II.** DFT Studies.....S7

**Part III.** <sup>1</sup>H, <sup>13</sup>C and 2D NMR spectra.....S33

## Part I. Stereochemical Proofs

The peaks in the  $^1\text{H}$  NMR spectra were assigned using  $^1\text{H}/^1\text{H}$  2D COSY,  $^1\text{H}/^{13}\text{C}$  2D HSQC experiments, chemical shifts, and coupling constants. Formation of the 3,4-*syn* stereochemistry for the Mukaiyama aldol reaction along with the stereochemistry of the C2-bromide is supported by relevant nuclear Overhauser effect (nOe) enhancements (2D NOESY) of lactone **S3** resulting from silyl group deprotection of **34a**. Further support for a 3,4-*syn* aldol reaction is obtained from 2D NOESY effects of the final thioanalogues as shown below.

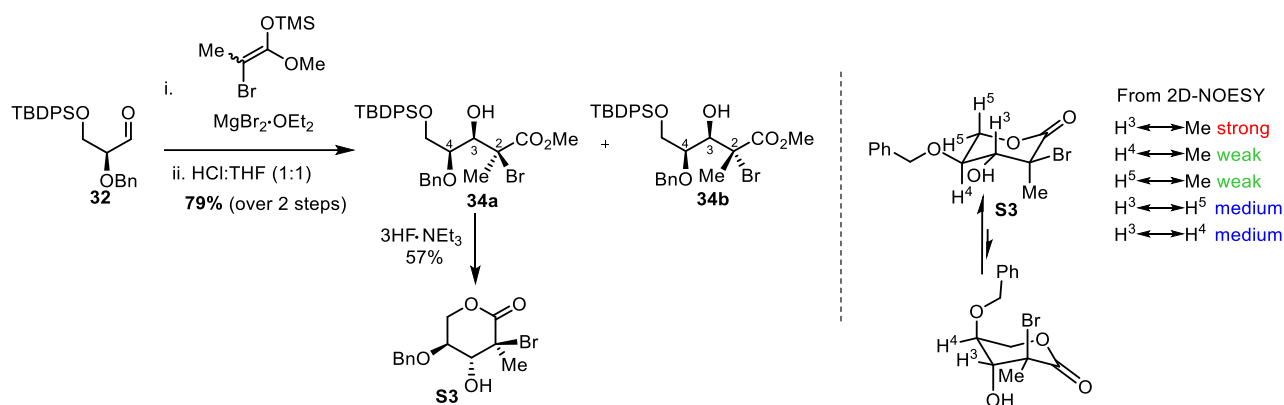

The structure of **34b** as the C2-bromo diastereomer was confirmed from the subsequent vinyl group transfer in which a mixture of dimethylvinylsilanes **35a,b** resulted in formation of only one methylester **36**. The stereochemistry of the C2 all-carbon quaternary center was confirmed in the subsequent cyclized intermediates.

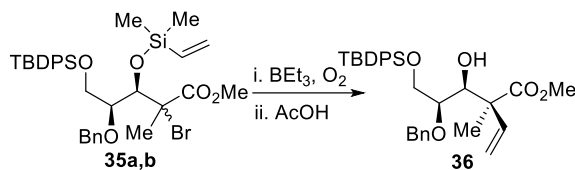

Determining the stereochemistry of the cyclized furanoside and thiofuranoside compounds supports the 3,4-*syn* stereochemistry for the Mukaiyama aldol reaction and the stereochemistry of the C2 all-carbon quaternary center.

NOE confirmed  $\alpha$ -L-anomer to be the major isomer for **41a,b**

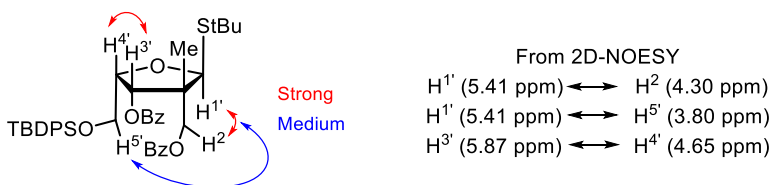

NOE confirmed  $\beta$ -L-anomer to be the major isomer for 42a,b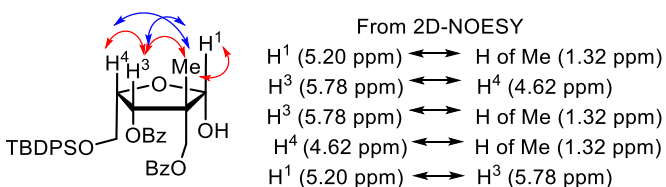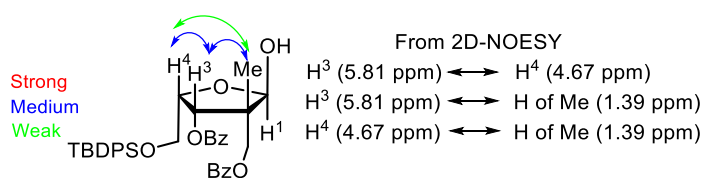NOE confirmed  $\alpha$ -L-anomer to be the major isomer for 44a,b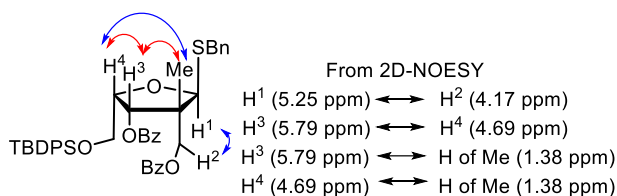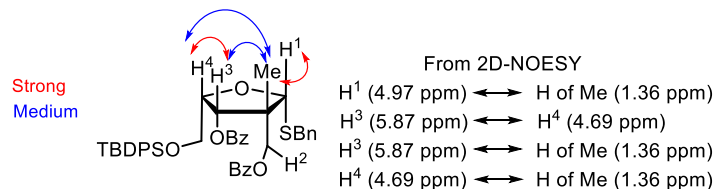NOE confirmed  $\beta$ -D-anomer for 47a and  $\alpha$ -D-anomer for 47b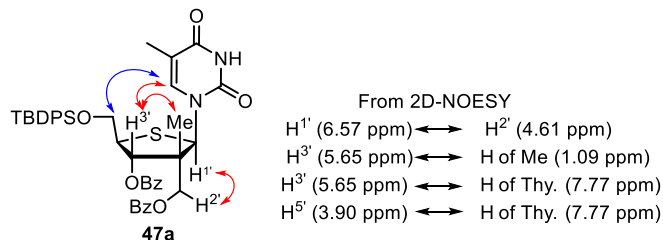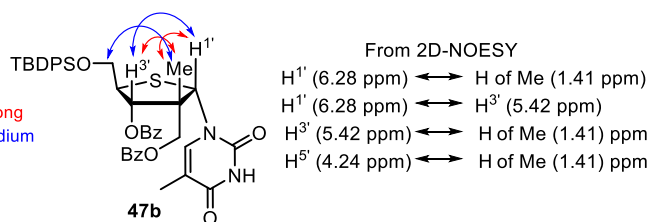NOE confirmed  $\beta$ -L-anomer for 50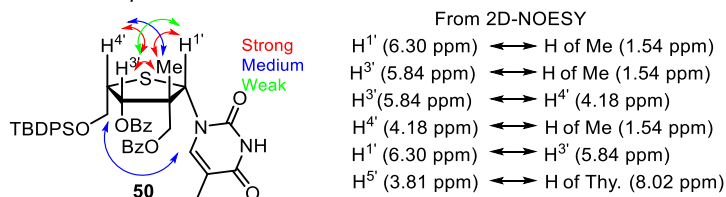NOE confirmed  $\beta$ -D-anomer for 61a and  $\alpha$ -D-anomer for 61b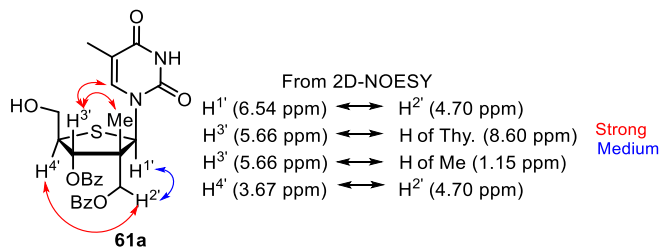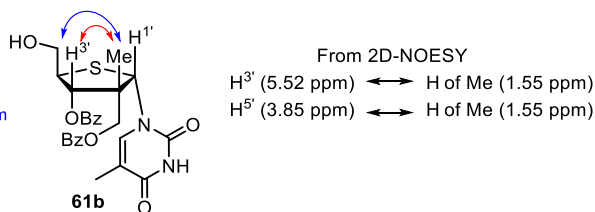

NOE confirmed  $\beta$ -D-anomer for 23a and  $\alpha$ -D-anomer for 23b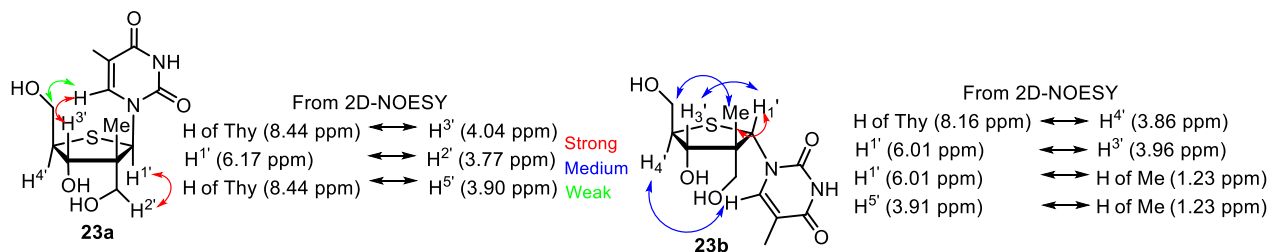NOE confirmed  $\beta$ -D-anomer for 62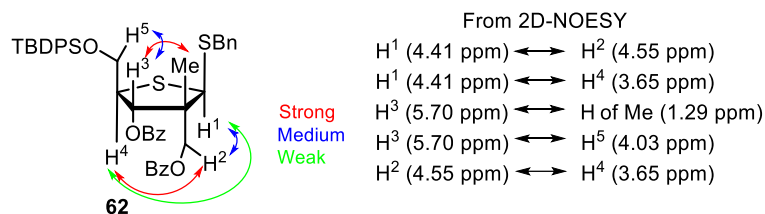NOE confirmed  $\beta$ -D-anomer to be the major isomer for 63a,b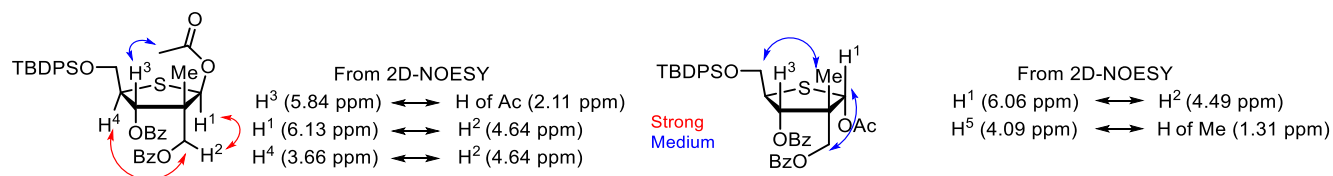



The N<sup>9</sup> regiochemistry of the purine ring of the following compounds was determined from HSQC and HMBC experiments. In addition, NOESY experiments confirmed the  $\beta$ - and  $\alpha$ -stereochemistry.

**NOE confirmed  $\beta$ -D-anomer for 64a**

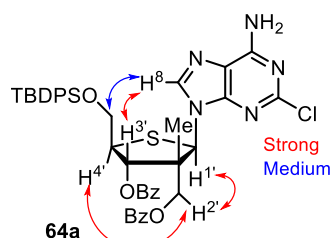

From 2D-NOESY

H<sup>8</sup> (8.58 ppm)  $\longleftrightarrow$  H<sup>3'</sup> (5.97 ppm)  
 H<sup>1'</sup> (6.42 ppm)  $\longleftrightarrow$  H<sup>2'</sup> (4.68 ppm)  
 H<sup>8</sup> (8.58 ppm)  $\longleftrightarrow$  H<sup>5'</sup> (3.90 ppm)  
 H<sup>4'</sup> (3.84 ppm)  $\longleftrightarrow$  H<sup>2'</sup> (4.68 ppm)

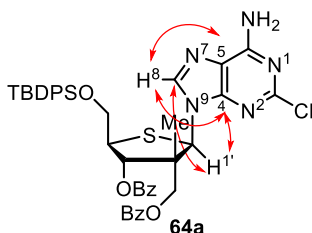

From HSQC

H<sup>1'</sup> (6.42 ppm)  $\longleftrightarrow$  C<sup>1'</sup> (60.3 ppm)  
 H<sup>8</sup> (8.58 ppm)  $\longleftrightarrow$  C<sup>8</sup> (141.0 ppm)

From HMBC

H<sup>8</sup> (8.58 ppm)  $\longleftrightarrow$  C<sup>5</sup> (118.2 ppm)  
 H<sup>8</sup> (8.58 ppm)  $\longleftrightarrow$  C<sup>4</sup> (151.9 ppm)  
 H<sup>1'</sup> (6.42 ppm)  $\longleftrightarrow$  C<sup>8</sup> (141.0 ppm)  
**H<sup>1'</sup> (6.42 ppm)  $\longleftrightarrow$  C<sup>4</sup> (151.9 ppm)**

**NOE confirmed  $\alpha$ -D-anomer for 64b**

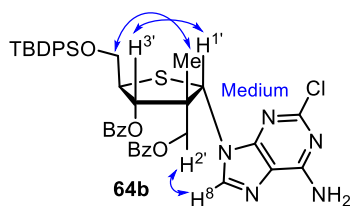

From 2D-NOESY

H<sup>1'</sup> (6.19 ppm)  $\longleftrightarrow$  H<sup>3'</sup> (5.53 ppm)  
 H<sup>8</sup> (8.38 ppm)  $\longleftrightarrow$  H<sup>2'</sup> (4.34 ppm)  
 H<sup>5'</sup> (3.86 ppm)  $\longleftrightarrow$  H of Me (1.48 ppm)

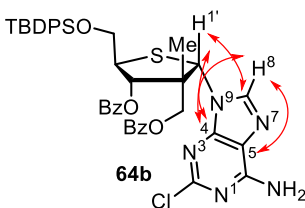

From HSQC

H<sup>1'</sup> (6.19 ppm)  $\longleftrightarrow$  C<sup>1'</sup> (65.5 ppm)  
 H<sup>8</sup> (8.38 ppm)  $\longleftrightarrow$  C<sup>8</sup> (141.2 ppm)

From HMBC

H<sup>8</sup> (8.38 ppm)  $\longleftrightarrow$  C<sup>5</sup> (117.9 ppm)  
 H<sup>8</sup> (8.38 ppm)  $\longleftrightarrow$  C<sup>4</sup> (151.7 ppm)  
 H<sup>1'</sup> (6.19 ppm)  $\longleftrightarrow$  C<sup>8</sup> (141.2 ppm)  
**H<sup>1'</sup> (6.19 ppm)  $\longleftrightarrow$  C<sup>4</sup> (151.7 ppm)**

NOE confirmed  $\beta$ -D-anomer for 65a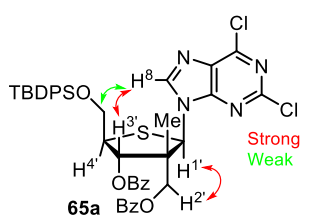

From 2D-NOESY

$H^{1'} (6.48 \text{ ppm}) \longleftrightarrow H^{2'} (4.71 \text{ ppm})$   
 $H^8 (8.91 \text{ ppm}) \longleftrightarrow H^{3'} (5.98 \text{ ppm})$   
 $H^8 (8.91 \text{ ppm}) \longleftrightarrow H^{5'} (4.00 \text{ ppm})$

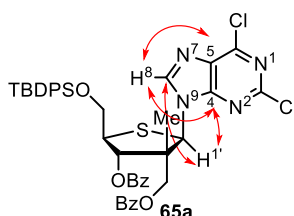

From HSQC

$H^{1'} (6.48 \text{ ppm}) \longleftrightarrow C^{1'} (61.1 \text{ ppm})$   
 $H^8 (8.91 \text{ ppm}) \longleftrightarrow C^8 (145.9 \text{ ppm})$

From HMBC

$H^8 (8.91 \text{ ppm}) \longleftrightarrow C^5 (131.1 \text{ ppm})$   
 $H^8 (8.91 \text{ ppm}) \longleftrightarrow C^4 (153.42 \text{ ppm})$   
 $H^{1'} (6.48 \text{ ppm}) \longleftrightarrow C^8 (145.9 \text{ ppm})$   
 $H^{1'} (6.48 \text{ ppm}) \longleftrightarrow C^4 (153.42 \text{ ppm})$

NOE confirmed  $\alpha$ -D-anomer for 65b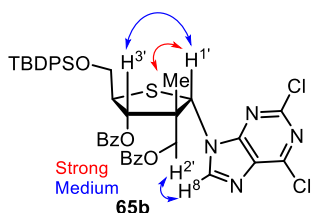

From 2D-NOESY

$H^{1'} (6.23 \text{ ppm}) \longleftrightarrow H \text{ of Me } 1.51 \text{ ppm}$   
 $H^{1'} (6.23 \text{ ppm}) \longleftrightarrow H^{3'} (5.56 \text{ ppm})$   
 $H^8 (8.69 \text{ ppm}) \longleftrightarrow H^{2'} (4.30 \text{ ppm})$

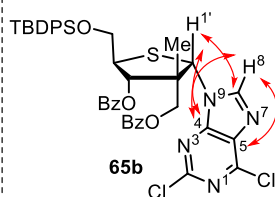

From HSQC

$H^{1'} (6.23 \text{ ppm}) \longleftrightarrow C^{1'} (66.4 \text{ ppm})$   
 $H^8 (8.69 \text{ ppm}) \longleftrightarrow C^8 (146.2 \text{ ppm})$

From HMBC

$H^8 (8.69 \text{ ppm}) \longleftrightarrow C^5 (130.8 \text{ ppm})$   
 $H^8 (8.69 \text{ ppm}) \longleftrightarrow C^4 (153.3 \text{ ppm})$   
 $H^{1'} (6.23 \text{ ppm}) \longleftrightarrow C^8 (146.2 \text{ ppm})$   
 $H^{1'} (6.23 \text{ ppm}) \longleftrightarrow C^4 (153.3 \text{ ppm})$

NOE confirmed  $\beta$ -D-anomer for 24a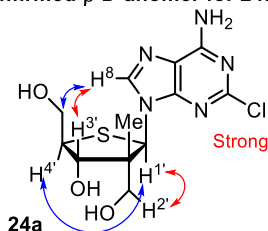

From 2D-NOESY

$H^{1'} (6.00 \text{ ppm}) \longleftrightarrow H^{2'} (3.84 \text{ ppm})$   
 $H^8 (8.65 \text{ ppm}) \longleftrightarrow H^{3'} (4.32 \text{ ppm})$   
 $H^8 (8.65 \text{ ppm}) \longleftrightarrow H^{5'} (4.05 \text{ ppm})$   
 $H^{4'} (8.65 \text{ ppm}) \longleftrightarrow H^{1'} (6.00 \text{ ppm})$

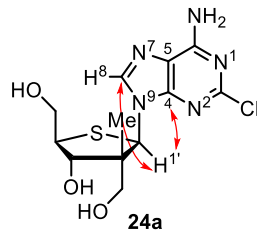

From HMBC

$H^{1'} (6.00 \text{ ppm}) \longleftrightarrow C^4 (152.3 \text{ ppm})$   
 $H^{1'} (6.00 \text{ ppm}) \longleftrightarrow C^8 (143.2 \text{ ppm})$

NOE confirmed  $\alpha$ -D-anomer for 24b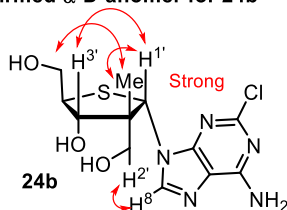

From 2D-NOESY

$H^{1'} (5.90 \text{ ppm}) \longleftrightarrow H \text{ of Me } (1.29 \text{ ppm})$   
 $H^{1'} (5.90 \text{ ppm}) \longleftrightarrow H^{3'} (4.03 \text{ ppm})$   
 $H^8 (8.56 \text{ ppm}) \longleftrightarrow H^{2'} (3.55 \text{ ppm})$   
 $H^{5'} (3.67 \text{ ppm}) \longleftrightarrow H \text{ of Me } (1.29 \text{ ppm})$

**Part II. DFT Studies**

Free Gibbs Energies (Ha) (1 Hartree = 627.5095 kcal mol<sup>-1</sup>) at 423.15K

Free energy profile data:

|                                                                              |                                                                                                                                              | Relative Gibbs Free Energies |                           |
|------------------------------------------------------------------------------|----------------------------------------------------------------------------------------------------------------------------------------------|------------------------------|---------------------------|
|                                                                              |                                                                                                                                              | (Ha)                         | (kcal mol <sup>-1</sup> ) |
| <b>Data for Scheme 7:</b>                                                    |                                                                                                                                              |                              |                           |
| <b>51</b>                                                                    | <b>51</b> (–2362.966673)                                                                                                                     | 0                            | 0                         |
| <b>TS A1</b>                                                                 | <b>TS A1</b> (–2362.914405) – <b>51</b> (–2362.966673)                                                                                       | 0.052268                     | 32.8                      |
| <b>52a</b> (X= MsO-)                                                         | <b>52a</b> (–2362.948353) – <b>51</b> (–2362.966673)                                                                                         | 0.0183200                    | 11.5                      |
| <b>53</b>                                                                    | [ <b>53</b> (–1428.686968) + <b>Bnl</b> (–282.111711) + <b>NaOMs</b> (–825.948793)] – [ <b>Nal</b> (–173.761283) + <b>51</b> (–2362.966673)] | – 0.019516                   | –12.2                     |
| <b>TS A2</b> (C2'-endo)                                                      | <b>TS A2</b> (–2362.900222) – <b>51</b> (–2362.966673)                                                                                       | 0.066451                     | 41.7                      |
| <b>TS A2'</b><br>(C2'-exo) <i>not shown in Scheme, structure in SI below</i> | <b>TS A2'</b> (–2362.895187) – <b>51</b> (–2362.966673)                                                                                      | 0.071486                     | 44.9                      |
| <b>52b</b>                                                                   | <b>52b</b> (–2362.935946) – <b>51</b> (–2362.966673)                                                                                         | 0.030727                     | 19.3                      |
| <b>52a'</b> (X= I-)                                                          | [ <b>52a'</b> (–1710.758325) + <b>NaOMs</b> (–825.948793) – [ <b>Nal</b> (–173.761283) + <b>51</b> (–2362.966673)]]                          | 0.020838                     | 13.1                      |
| <b>TS B</b>                                                                  | [ <b>TS B</b> (–1710.758325) + <b>NaOMs</b> (–825.948793) – [ <b>Nal</b> (–173.761283) + <b>51</b> (–2362.966673)]]                          | 0.04637300                   | 29.1                      |
| <b>Data for Scheme 8a:</b>                                                   |                                                                                                                                              |                              |                           |
| <b>54</b>                                                                    | <b>54</b> (–2362.966364) – <b>51</b> (–2362.966673)                                                                                          | 0.0003090                    | 0.19                      |
| <b>TS C1</b>                                                                 | <b>TS C1</b> (–2362.908045) – <b>51</b> (–2362.966673)                                                                                       | 0.0586280                    | 36.8                      |
|                                                                              | $\Delta G_{\text{act}} = \text{TS C1} - \text{54}$                                                                                           |                              | 36.6                      |
| <b>55a</b>                                                                   | <b>55a</b> (–2362.937959) – <b>51</b> (–2362.966673)                                                                                         | 0.0287140                    | 18.0                      |

|                            |                                                                                                                                            |            |       |
|----------------------------|--------------------------------------------------------------------------------------------------------------------------------------------|------------|-------|
| <b>56</b>                  | <b>[56</b> (–1428.691312) + <b>Bnl</b> (–282.111711) + <b>NaOMs</b> (–825.948793)] – <b>[Nal</b> (–173.761283) + <b>51</b> (–2362.966673)] | –0.0238600 | –15.0 |
| <b>TS C2</b>               | <b>TS C2</b> (–2362.907431) – <b>51</b> (–2362.966673)                                                                                     | –0.0592420 | 37.2  |
|                            | $\Delta G_{\text{act}} = \text{TS C2} - \text{54}$                                                                                         |            | 37.0  |
| <b>55b</b>                 | <b>55a</b> (–2362.950435) – <b>51</b> (–2362.966673)                                                                                       | 0.0162380  | 10.2  |
| <b>Data for Scheme 8b:</b> |                                                                                                                                            |            |       |
| <b>58</b>                  | <b>58</b> (–2362.966256) – <b>51</b> (–2362.966673)                                                                                        | 0.0004170  | 0.26  |
| <b>TS D</b>                | <b>TS D</b> (–2362.914899) – <b>51</b> (–2362.966673)                                                                                      | 0.0517740  | 32.5  |
|                            | $\Delta G_{\text{act}} = \text{TS D} - \text{58}$                                                                                          |            | 32.2  |
| <b>59</b>                  | <b>59</b> (–2362.952394) – <b>51</b> (–2362.966673)                                                                                        | 0.0142790  | 9.0   |
| <b>60</b>                  | <b>[56</b> (–1428.693878) + <b>Bnl</b> (–282.111711) + <b>NaOMs</b> (–825.948793)] – <b>[Nal</b> (–173.761283) + <b>51</b> (–2362.966673)] | –0.0264260 | –16.6 |

**51**

SCF energy: – 2363.37489440 hartree  
 Free energy correction: + 0.408221 hartree  
 imaginary frequency: none

|   |            |            |            |
|---|------------|------------|------------|
| C | -3.0345010 | -0.1292220 | 0.5096560  |
| C | -1.5453300 | -0.5455980 | 0.4937150  |
| C | -0.9497640 | -1.3544620 | -0.6833840 |
| C | 0.6010780  | -1.2880440 | -0.4987760 |
| C | -4.1118280 | -1.1925800 | 0.4069240  |
| O | -4.2579640 | -1.6407430 | -0.9153030 |
| C | -5.2367040 | -2.6528500 | -1.0194840 |
| C | -1.3857570 | -0.7491530 | -2.0239640 |
| C | -1.3693400 | -2.8311810 | -0.6135960 |
| N | 2.2150510  | 1.7346660  | 0.8152970  |
| C | 1.5850690  | 0.5146640  | 0.8266660  |
| N | 1.1352700  | 0.0830030  | -0.4180010 |
| C | 1.3357450  | 0.8512080  | -1.5444980 |
| C | 1.9546190  | 2.0455720  | -1.5270730 |
| C | 2.4875770  | 2.5599430  | -0.2790830 |
| O | 3.1225910  | 3.5893240  | -0.1293320 |
| O | 1.4365590  | -0.1324950 | 1.8508220  |
| O | -1.3088630 | -1.3042460 | 1.6878070  |
| C | -1.1025250 | -0.5991970 | 2.8271470  |
| C | -0.6161860 | -1.4946350 | 3.9281800  |
| O | -1.2872170 | 0.5900960  | 2.9082190  |
| H | -3.1740280 | 0.3608400  | 1.4797350  |
| H | -0.9961340 | 0.3954850  | 0.5808170  |

|   |            |            |            |
|---|------------|------------|------------|
| H | 0.8348360  | -1.7366050 | 0.4689090  |
| H | -5.0594510 | -0.7594090 | 0.7591020  |
| H | -3.8429470 | -2.0177500 | 1.0858720  |
| H | -5.3075640 | -2.9273300 | -2.0724610 |
| H | -4.9546220 | -3.5372370 | -0.4314020 |
| H | -6.2135290 | -2.2933290 | -0.6696720 |
| H | -1.2211170 | 0.3318460  | -2.0587930 |
| H | -0.8334870 | -1.2204830 | -2.8456410 |
| H | -2.4504780 | -0.9325130 | -2.1794010 |
| H | -1.0397690 | -3.3591940 | -1.5110660 |
| H | -0.9325880 | -3.3269800 | 0.2574920  |
| H | -2.4555860 | -2.9099630 | -0.5629630 |
| H | 2.5780870  | 2.0364930  | 1.7132990  |
| H | 0.9849040  | 0.4057940  | -2.4662580 |
| H | 2.1012570  | 2.6190500  | -2.4314130 |
| H | -1.1865000 | -2.4250340 | 3.9499940  |
| H | 0.4304420  | -1.7343970 | 3.7201460  |
| H | -0.6899870 | -0.9755090 | 4.8825220  |
| O | -1.4005000 | 2.4688010  | -0.5337000 |
| S | -2.8265280 | 2.3625590  | -0.2579410 |
| O | -3.3235450 | 2.7913660  | 1.0384820  |
| O | -3.3099320 | 0.8433420  | -0.5245000 |
| C | -3.7468980 | 3.1184320  | -1.5675750 |
| H | -3.4388150 | 2.6626100  | -2.5085420 |
| H | -4.8086100 | 2.9635760  | -1.3792590 |
| H | -3.4987120 | 4.1805660  | -1.5539800 |
| S | 1.4987600  | -2.2509720 | -1.7714630 |
| C | 3.0325140  | -2.6355290 | -0.8469650 |
| H | 2.7689820  | -3.2604140 | 0.0109440  |
| H | 3.5978210  | -3.2593980 | -1.5469310 |
| C | 3.8572360  | -1.4504950 | -0.4036770 |
| C | 4.1833800  | -1.2959280 | 0.9448540  |
| C | 4.3293650  | -0.5095330 | -1.3247040 |
| C | 4.9675690  | -0.2230920 | 1.3684090  |
| H | 3.8094790  | -2.0124480 | 1.6713830  |
| C | 5.1090200  | 0.5630780  | -0.9048520 |
| H | 4.0659300  | -0.6124130 | -2.3749770 |
| C | 5.4318480  | 0.7090000  | 0.4449460  |
| H | 5.2066270  | -0.1147310 | 2.4219240  |
| H | 5.4580580  | 1.2925940  | -1.6295340 |
| H | 6.0333700  | 1.5512450  | 0.7723820  |

**TS A1**

SCF energy: – 2363.31723472 hartree

Free energy correction: + 0.402830 hartree

imaginary frequency: – 523.7i cm<sup>–1</sup>

|   |            |            |            |
|---|------------|------------|------------|
| C | -1.0364670 | -0.2666200 | 0.8393350  |
| C | -0.2704200 | -1.4805040 | 0.3366710  |
| C | 1.2594480  | -1.4700320 | 0.5685830  |
| C | 1.7752610  | -0.2198340 | -0.1834800 |
| C | -1.3086640 | -0.0218370 | 2.3089810  |
| O | -1.1968920 | -1.2409920 | 2.9898040  |
| C | -1.3207950 | -1.0738210 | 4.3858100  |
| C | 1.8674880  | -2.7274630 | -0.0646740 |
| C | 1.6097480  | -1.4473730 | 2.0592430  |

|   |            |            |            |
|---|------------|------------|------------|
| N | 5.3163700  | -0.1931820 | -1.0898710 |
| C | 3.9617100  | -0.3882640 | -1.2228550 |
| N | 3.2146210  | -0.0069730 | -0.1037580 |
| C | 3.8239650  | 0.5467600  | 1.0050170  |
| C | 5.1524610  | 0.7275580  | 1.1025400  |
| C | 6.0177970  | 0.3378800  | 0.0001390  |
| O | 7.2285610  | 0.4420810  | -0.0392940 |
| O | 3.4575470  | -0.8588450 | -2.2244280 |
| O | -0.4820330 | -1.5080100 | -1.0745680 |
| C | -1.1389010 | -2.5669690 | -1.6125530 |
| C | -1.3298710 | -2.3695190 | -3.0869900 |
| O | -1.4920540 | -3.5214650 | -0.9672460 |
| H | -1.5355740 | 0.3467710  | 0.1033040  |
| H | -0.7073150 | -2.3651690 | 0.8044820  |
| H | 1.5514740  | -0.3426420 | -1.2438750 |
| H | -2.3203860 | 0.3947570  | 2.3923010  |
| H | -0.6037510 | 0.7138510  | 2.7205790  |
| H | -1.2411340 | -2.0638400 | 4.8353890  |
| H | -0.5213750 | -0.4296510 | 4.7786340  |
| H | -2.2916480 | -0.6331020 | 4.6460450  |
| H | 2.9475480  | -2.7510480 | 0.1106970  |
| H | 1.4319890  | -3.6216480 | 0.3915370  |
| H | 1.6977200  | -2.7590480 | -1.1433410 |
| H | 2.6917770  | -1.5490760 | 2.1859740  |
| H | 1.2883340  | -0.5316600 | 2.5678900  |
| H | 1.1281870  | -2.2862340 | 2.5660100  |
| H | 5.8711160  | -0.4735290 | -1.8926770 |
| H | 3.1506880  | 0.8449000  | 1.8003090  |
| H | 5.5983030  | 1.1699800  | 1.9819450  |
| H | -0.3772590 | -2.1124590 | -3.5565710 |
| H | -1.7348860 | -3.2801220 | -3.5259570 |
| H | -2.0238410 | -1.5370180 | -3.2257130 |
| O | -3.1807910 | -0.3528680 | -1.4841490 |
| S | -3.8409240 | -0.8460500 | -0.2543610 |
| O | -4.7791370 | 0.1062760  | 0.3559160  |
| O | -2.8192130 | -1.3644530 | 0.7361740  |
| C | -4.7503000 | -2.3088760 | -0.7084950 |
| H | -4.0426560 | -3.0318550 | -1.1167330 |
| H | -5.2327850 | -2.7094670 | 0.1834080  |
| H | -5.4965280 | -2.0280190 | -1.4529170 |
| S | 0.8019490  | 1.2145720  | 0.4010700  |
| C | 0.1386280  | 1.8900180  | -1.1771020 |
| H | 0.9924790  | 2.2383030  | -1.7631000 |
| H | -0.3594820 | 1.0681610  | -1.7013080 |
| C | -0.8192600 | 3.0006550  | -0.8370370 |
| C | -0.3332220 | 4.2471350  | -0.4293510 |
| C | -2.1981660 | 2.7794860  | -0.8865940 |
| C | -1.2164790 | 5.2622010  | -0.0774640 |
| H | 0.7397900  | 4.4199020  | -0.3910430 |
| C | -3.0803030 | 3.7974550  | -0.5279430 |
| H | -2.5855130 | 1.8165590  | -1.2159910 |
| C | -2.5925790 | 5.0371670  | -0.1234320 |
| H | -0.8322600 | 6.2287760  | 0.2326470  |
| H | -4.1495010 | 3.6144080  | -0.5659050 |
| H | -3.2812000 | 5.8289320  | 0.1542610  |

**52a**

SCF energy: – 2363.35291611 hartree

Free energy correction: + 0.404563 hartree

imaginary frequency: none

|   |            |            |            |
|---|------------|------------|------------|
| C | 1.1959810  | 1.1959320  | 0.9098960  |
| C | 0.1466340  | 2.2303180  | 1.3386390  |
| C | -1.2687060 | 1.6324790  | 1.2151030  |
| C | -1.2483180 | 0.9843070  | -0.1869940 |
| C | 1.8804340  | 0.3698790  | 1.9889030  |
| O | 2.7913940  | -0.4402060 | 1.2973260  |
| C | 3.3199500  | -1.4788320 | 2.0980110  |
| C | -2.3568400 | 2.7090830  | 1.2432450  |
| C | -1.5211680 | 0.6215520  | 2.3390080  |
| N | -4.3178710 | -0.1423070 | -1.7746350 |
| C | -3.2747600 | 0.6911550  | -1.4616720 |
| N | -2.3670140 | 0.1482830  | -0.5434610 |
| C | -2.5207600 | -1.1403680 | -0.0487490 |
| C | -3.5450680 | -1.9343010 | -0.3983810 |
| C | -4.5606660 | -1.4489330 | -1.3184640 |
| O | -5.5424020 | -2.0529730 | -1.7040260 |
| O | -3.1495960 | 1.8089070  | -1.9262550 |
| O | 0.2893810  | 3.3152260  | 0.4126660  |
| C | 0.1786230  | 4.5777570  | 0.9072340  |
| C | 0.3219340  | 5.5892660  | -0.1919220 |
| O | -0.0163950 | 4.8088230  | 2.0725090  |
| H | 1.9821080  | 1.6885830  | 0.3296530  |
| H | 0.3375000  | 2.5910530  | 2.3531880  |
| H | -1.1954770 | 1.7739040  | -0.9396410 |
| H | 1.1732320  | -0.2406270 | 2.5603460  |
| H | 2.3923170  | 1.0636440  | 2.6740270  |
| H | 3.9374230  | -2.0959900 | 1.4429810  |
| H | 3.9413320  | -1.0740500 | 2.9078280  |
| H | 2.5080710  | -2.0813370 | 2.5206410  |
| H | -3.3398200 | 2.2407340  | 1.1353410  |
| H | -2.3324720 | 3.2379030  | 2.1999560  |
| H | -2.2384570 | 3.4323530  | 0.4323070  |
| H | -2.5605500 | 0.2811100  | 2.3048790  |
| H | -0.8832820 | -0.2668030 | 2.2910240  |
| H | -1.3673000 | 1.1110860  | 3.3057730  |
| H | -4.9932780 | 0.2402820  | -2.4288510 |
| H | -1.7479240 | -1.4858150 | 0.6316990  |
| H | -3.5987950 | -2.9446420 | -0.0178660 |
| H | -0.5085560 | 5.4776400  | -0.8947270 |
| H | 0.3140520  | 6.5906550  | 0.2343310  |
| H | 1.2502650  | 5.4151140  | -0.7404170 |
| O | 0.1243220  | -2.1958970 | 1.7698910  |
| S | 0.0482550  | -3.3949240 | 0.8841730  |
| O | 0.7135410  | -3.1907720 | -0.4225790 |
| O | -1.3316120 | -3.9168580 | 0.7765660  |
| C | 0.9894450  | -4.6601890 | 1.7259120  |
| H | 0.5530310  | -4.8208140 | 2.7124930  |
| H | 0.9416360  | -5.5777800 | 1.1381240  |
| H | 2.0242350  | -4.3275360 | 1.8182800  |
| S | 0.3606010  | 0.0548860  | -0.2744860 |

|   |           |            |            |
|---|-----------|------------|------------|
| C | 1.0301680 | 0.6271030  | -1.8859360 |
| H | 0.3911420 | 0.1417870  | -2.6294000 |
| H | 0.9009110 | 1.7112320  | -1.9395170 |
| C | 2.4723870 | 0.2122050  | -1.9880050 |
| C | 2.8271090 | -1.1394160 | -1.9212520 |
| C | 3.4607310 | 1.1879320  | -2.1216050 |
| C | 4.1664770 | -1.5030170 | -2.0041700 |
| H | 2.0618790 | -1.8982640 | -1.7681580 |
| C | 4.8013230 | 0.8170460  | -2.2086730 |
| H | 3.1819250 | 2.2378020  | -2.1676340 |
| C | 5.1539540 | -0.5279440 | -2.1503320 |
| H | 4.4413810 | -2.5515650 | -1.9494940 |
| H | 5.5658060 | 1.5793100  | -2.3187730 |
| H | 6.1979170 | -0.8182450 | -2.2142730 |

**53**

SCF energy: – 1428.94581238 hartree

Free energy correction: + 0.258845 hartree

imaginary frequency: none

|   |            |            |            |
|---|------------|------------|------------|
| C | -2.0515740 | 0.8261240  | -0.4414740 |
| C | -1.8235610 | -0.4490230 | 0.3902520  |
| C | -0.3501980 | -0.5455770 | 0.8298830  |
| C | 0.4202240  | -0.1392030 | -0.4473410 |
| C | -2.7064650 | 1.9707770  | 0.3144070  |
| O | -2.8529210 | 3.0323920  | -0.5937730 |
| C | -3.4047690 | 4.1802160  | 0.0120910  |
| C | 0.0395030  | -1.9653770 | 1.2495410  |
| C | -0.0998770 | 0.4046310  | 2.0054930  |
| N | 4.0411610  | -0.6965130 | -0.4090810 |
| C | 2.7065780  | -0.9528910 | -0.6323350 |
| N | 1.8518300  | 0.0871780  | -0.2591730 |
| C | 2.3519400  | 1.2578630  | 0.2723270  |
| C | 3.6630120  | 1.4754100  | 0.4845790  |
| C | 4.6303400  | 0.4485870  | 0.1392940  |
| O | 5.8381230  | 0.5122810  | 0.2790460  |
| O | 2.3140560  | -2.0019660 | -1.1067500 |
| O | -2.1373450 | -1.5463000 | -0.4808560 |
| C | -2.7993420 | -2.5989840 | 0.0493340  |
| C | -3.0113210 | -3.6662770 | -0.9868610 |
| O | -3.1538790 | -2.6520520 | 1.2015720  |
| H | -2.7074200 | 0.5700950  | -1.2765230 |
| H | -2.4927010 | -0.4878390 | 1.2552270  |
| H | 0.3487610  | -0.9542340 | -1.1666690 |
| H | -2.1052830 | 2.2844560  | 1.1804620  |
| H | -3.6900050 | 1.6396930  | 0.6867850  |
| H | -3.4817530 | 4.9485610  | -0.7581690 |
| H | -4.4042950 | 3.9726040  | 0.4175550  |
| H | -2.7636310 | 4.5452700  | 0.8258670  |
| H | 1.0877750  | -1.9837290 | 1.5645340  |
| H | -0.5761460 | -2.2952310 | 2.0914590  |
| H | -0.0724350 | -2.6757010 | 0.4262930  |
| H | 0.9275310  | 0.3008920  | 2.3680080  |
| H | -0.2643900 | 1.4538390  | 1.7466360  |
| H | -0.7685380 | 0.1478780  | 2.8332110  |
| H | 4.6702330  | -1.4478570 | -0.6734950 |



|   |            |            |            |
|---|------------|------------|------------|
| H | 1.6027950  | 2.0083640  | 0.4934730  |
| H | 4.0193440  | 2.4089840  | 0.8961780  |
| H | -2.0407850 | -4.0587820 | -1.3030300 |
| H | -3.6155550 | -4.4675920 | -0.5653340 |
| H | -3.5004930 | -3.2408710 | -1.8658160 |
| S | -0.4296970 | 1.3352530  | -1.1454960 |

**Bnl**

SCF energy: – 282.17852233 hartree

Free energy correction: + 0.066812 hartree

imaginary frequency: none

|   |            |            |            |
|---|------------|------------|------------|
| C | -3.0122570 | 1.2069310  | -0.2667200 |
| C | -1.7527240 | 1.2057950  | 0.3245910  |
| C | -1.1143460 | -0.0006270 | 0.6266810  |
| C | -1.7533870 | -1.2063600 | 0.3233700  |
| C | -3.0129530 | -1.2061680 | -0.2679310 |
| C | -3.6445120 | 0.0007020  | -0.5650320 |
| H | -3.5011810 | 2.1489240  | -0.4936060 |
| H | -1.2570930 | 2.1455740  | 0.5546600  |
| H | -1.2583290 | -2.1466710 | 0.5524960  |
| H | -3.5024090 | -2.1476600 | -0.4957480 |
| H | -4.6270860 | 0.0012050  | -1.0259110 |
| C | 0.2310450  | -0.0013080 | 1.2694010  |
| H | 0.4200810  | -0.8951250 | 1.8610350  |
| H | 0.4200650  | 0.8913050  | 1.8628630  |
| I | 1.8426560  | 0.0001630  | -0.2166410 |

**NaOMs**

SCF energy: – 825.95319932 hartree

Free energy correction: + 0.004406 hartree

imaginary frequency: none

|    |            |            |            |
|----|------------|------------|------------|
| O  | -0.3993750 | -0.0272300 | -1.2166640 |
| S  | 0.4577020  | -0.1597820 | -0.0000190 |
| O  | 1.3226060  | -1.3469700 | 0.0005210  |
| C  | 1.5334320  | 1.2642470  | 0.0000500  |
| H  | 0.9209770  | 2.1663870  | -0.0004830 |
| H  | 2.1554210  | 1.2280630  | 0.8950850  |
| H  | 2.1560020  | 1.2274670  | -0.8945630 |
| O  | -0.4000990 | -0.0267270 | 1.2160980  |
| Na | -2.3582980 | 0.1415030  | 0.0000300  |

**NaI**

SCF energy: – 173.72447705 hartree

Free energy correction: – 0.036806 hartree

imaginary frequency: none

|    |           |           |            |
|----|-----------|-----------|------------|
| Na | 0.0000000 | 0.0000000 | -2.4717370 |
| I  | 0.0000000 | 0.0000000 | 0.5130020  |

**TS A2 (C2'-endo)**

SCF energy: – 2363.30296811 hartree

Free energy correction: + 0.402746 hartree

imaginary frequency: - 535.0i cm<sup>-1</sup>

|   |            |            |            |
|---|------------|------------|------------|
| C | -1.6308480 | 0.4636390  | 0.4531870  |
| C | -1.5628040 | -1.0363170 | 0.7090140  |
| C | -0.1996730 | -1.6182580 | 1.1721370  |
| C | 0.7848830  | -1.2285360 | 0.0451690  |
| C | -1.4834030 | 1.5508140  | 1.4844040  |
| O | -1.1733450 | 2.7370230  | 0.7995280  |
| C | -1.2666110 | 3.8702420  | 1.6432420  |
| C | -0.3155100 | -3.1483480 | 1.2189690  |
| C | 0.0980180  | -1.0991330 | 2.5935550  |
| N | 4.0335940  | -2.4432610 | -1.0769670 |
| C | 2.7212570  | -2.0390120 | -1.1395360 |
| N | 2.1481770  | -1.7197920 | 0.1036860  |
| C | 2.9006750  | -1.7971520 | 1.2605500  |
| C | 4.1853670  | -2.1945190 | 1.2852500  |
| C | 4.8574940  | -2.5606350 | 0.0482910  |
| O | 6.0084970  | -2.9342970 | -0.0648500 |
| O | 2.1032020  | -1.9607890 | -2.1809450 |
| O | -1.9170450 | -1.6260140 | -0.5382200 |
| C | -3.0366320 | -2.3923700 | -0.5902670 |
| C | -3.3648250 | -2.7449170 | -2.0095970 |
| O | -3.6595210 | -2.7152880 | 0.3900170  |
| H | -1.8587250 | 0.7700530  | -0.5595640 |
| H | -2.3132910 | -1.2956040 | 1.4593590  |
| H | 0.3736230  | -1.6579450 | -0.8707910 |
| H | -0.7112890 | 1.3146540  | 2.2274290  |
| H | -2.4359150 | 1.6352350  | 2.0190570  |
| H | -1.0213500 | 4.7422350  | 1.0363230  |
| H | -2.2828390 | 3.9782030  | 2.0403870  |
| H | -0.5588310 | 3.7992840  | 2.4808610  |
| H | 0.6247440  | -3.5865680 | 1.5670030  |
| H | -1.1060570 | -3.4436560 | 1.9156360  |
| H | -0.5439640 | -3.5650340 | 0.2347320  |
| H | 0.6744120  | -1.8311390 | 3.1641390  |
| H | 0.6393350  | -0.1512530 | 2.6166370  |
| H | -0.8395160 | -0.9576710 | 3.1409810  |
| H | 4.4514580  | -2.6780510 | -1.9722250 |
| H | 2.3870300  | -1.5234520 | 2.1704510  |
| H | 4.7358520  | -2.2526400 | 2.2134480  |
| H | -2.4747280 | -3.1121480 | -2.5249710 |
| H | -4.1542540 | -3.4947860 | -2.0263240 |
| H | -3.6948270 | -1.8277250 | -2.5069580 |
| O | -3.8420670 | 0.4830170  | -1.7778110 |
| S | -4.5249850 | 0.8082430  | -0.5118740 |
| O | -4.9866480 | 2.1948430  | -0.3813020 |
| O | -3.6790550 | 0.3720540  | 0.6754750  |
| C | -5.9565520 | -0.2471630 | -0.3954080 |
| H | -5.6249590 | -1.2861460 | -0.4146450 |
| H | -6.4705970 | -0.0324890 | 0.5420010  |
| H | -6.6073880 | -0.0292510 | -1.2433520 |
| S | 0.6657660  | 0.5678750  | -0.3566950 |
| C | 1.7612710  | 1.4285300  | 0.8410540  |
| H | 1.1308340  | 1.9368560  | 1.5757430  |
| H | 2.3710890  | 0.6793110  | 1.3509830  |
| C | 2.6314140  | 2.4083510  | 0.1026000  |

|   |           |           |            |
|---|-----------|-----------|------------|
| C | 2.1185660 | 3.6506050 | -0.2757150 |
| C | 3.9425640 | 2.0700490 | -0.2358210 |
| C | 2.9148380 | 4.5514670 | -0.9768270 |
| H | 1.0899190 | 3.8992400 | -0.0260750 |
| C | 4.7401140 | 2.9729230 | -0.9338380 |
| H | 4.3399220 | 1.0986980 | 0.0513780  |
| C | 4.2274100 | 4.2147010 | -1.3040810 |
| H | 2.5111930 | 5.5161520 | -1.2673970 |
| H | 5.7609780 | 2.7066710 | -1.1886570 |
| H | 4.8490060 | 4.9182980 | -1.8486380 |

**TS A2' (C2'-exo)**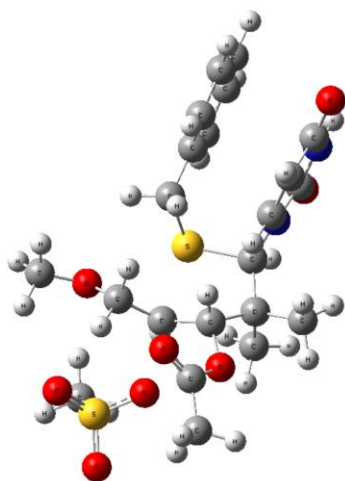

SCF energy: – 2363.30474595 hartree

Free energy correction: + 0.409559 hartree

imaginary frequency: – 525.8i cm<sup>-1</sup>

|   |            |            |            |
|---|------------|------------|------------|
| C | 1.7473330  | 0.2412120  | 0.2083900  |
| C | 1.1730540  | -1.1649260 | -0.0803800 |
| C | 0.2756040  | -1.6981470 | 1.0645460  |
| C | -0.9838450 | -0.8071500 | 1.2235720  |
| C | 1.8504060  | 1.2510450  | -0.8961890 |
| O | 1.8299980  | 2.5304920  | -0.3142300 |
| C | 2.2454380  | 3.5304810  | -1.2314320 |
| C | 1.0511360  | -1.6228920 | 2.3930030  |
| C | -0.1067780 | -3.1633650 | 0.8166660  |
| N | -4.5175910 | -1.1935770 | 0.4339790  |
| C | -3.3895670 | -0.9792590 | 1.1851910  |
| N | -2.1804130 | -1.1517460 | 0.4859440  |
| C | -2.1880180 | -1.5132710 | -0.8483770 |
| C | -3.3131540 | -1.7216850 | -1.5523490 |
| C | -4.6104950 | -1.5338860 | -0.9190250 |
| O | -5.6955130 | -1.6459090 | -1.4550370 |
| O | -3.4272060 | -0.6633810 | 2.3571140  |
| O | 2.1716720  | -2.1455310 | -0.2800650 |
| C | 2.8950740  | -2.0196210 | -1.4209360 |
| C | 4.0855190  | -2.9265820 | -1.4080120 |
| O | 2.5840660  | -1.2507770 | -2.2976570 |
| H | 2.0001320  | 0.5415940  | 1.2107730  |

|   |            |            |            |
|---|------------|------------|------------|
| H | 0.6083710  | -1.0680110 | -1.0142280 |
| H | -1.2894360 | -0.8411330 | 2.2688640  |
| H | 1.0238090  | 1.1200600  | -1.6116530 |
| H | 2.7801010  | 1.0768450  | -1.4475010 |
| H | 2.2031550  | 4.4829360  | -0.7022520 |
| H | 3.2686200  | 3.3329710  | -1.5681810 |
| H | 1.5723400  | 3.5678910  | -2.0982100 |
| H | 0.5442570  | -2.2278920 | 3.1498570  |
| H | 2.0647550  | -2.0086010 | 2.2540620  |
| H | 1.1227390  | -0.6026050 | 2.7855840  |
| H | -0.8998920 | -3.4604550 | 1.5095520  |
| H | -0.4519790 | -3.3517490 | -0.2031830 |
| H | 0.7625970  | -3.7989420 | 0.9944720  |
| H | -5.3925180 | -1.0211520 | 0.9193180  |
| H | -1.2169010 | -1.6276600 | -1.3091440 |
| H | -3.2794760 | -2.0078790 | -2.5941350 |
| H | 4.8397890  | -2.4505800 | -0.7727230 |
| H | 3.8320800  | -3.8968070 | -0.9779130 |
| H | 4.4737860  | -3.0389630 | -2.4189960 |
| O | 4.8838390  | 1.4727580  | -0.9802000 |
| S | 4.8957500  | 0.6860950  | 0.2644520  |
| O | 6.1442590  | -0.0256800 | 0.5557010  |
| O | 3.7289080  | -0.2902470 | 0.3319640  |
| C | 4.5970160  | 1.8363680  | 1.5929870  |
| H | 3.6619090  | 2.3599270  | 1.3808280  |
| H | 4.5342720  | 1.2832960  | 2.5310050  |
| H | 5.4262180  | 2.5443630  | 1.6244310  |
| C | -1.3535320 | 1.5423970  | -0.5045400 |
| H | -0.8470070 | 2.4921320  | -0.7169310 |
| H | -1.1558560 | 0.8777200  | -1.3513890 |
| C | -2.8451600 | 1.7316740  | -0.3279080 |
| C | -3.4202630 | 2.1164540  | 0.8845290  |
| C | -3.6693770 | 1.5352470  | -1.4408100 |
| C | -4.8004350 | 2.2742930  | 0.9874240  |
| H | -2.7954520 | 2.2665110  | 1.7601040  |
| C | -5.0476420 | 1.7058840  | -1.3411570 |
| H | -3.2289700 | 1.2383450  | -2.3892980 |
| C | -5.6174750 | 2.0659270  | -0.1218710 |
| H | -5.2363230 | 2.5565050  | 1.9404880  |
| H | -5.6749220 | 1.5369720  | -2.2104520 |
| H | -6.6930280 | 2.1839800  | -0.0367640 |
| S | -0.4507720 | 0.9653220  | 0.9688920  |

**52b**

SCF energy: – 2363.34264812 hartree  
 Free energy correction: + 0.406702 hartree  
 imaginary frequency: none

|   |            |            |            |
|---|------------|------------|------------|
| C | -1.2906160 | 0.7381490  | -0.2773890 |
| C | -1.6013100 | -0.6849900 | 0.2100080  |
| C | -0.3817830 | -1.2831070 | 0.9458510  |
| C | 0.7523660  | -1.0607220 | -0.0803840 |
| C | -1.5683250 | 1.8995030  | 0.6593530  |
| O | -1.3198380 | 3.0716990  | -0.0801570 |
| C | -1.7140820 | 4.2321940  | 0.6275200  |

|   |            |            |            |
|---|------------|------------|------------|
| C | -0.5529330 | -2.7917470 | 1.1640430  |
| C | -0.2726720 | -0.5736120 | 2.3150960  |
| N | 4.3185710  | -1.4855330 | -0.5558820 |
| C | 2.9933640  | -1.3350050 | -0.8587190 |
| N | 2.1347250  | -1.2659730 | 0.2541800  |
| C | 2.6325420  | -1.4118910 | 1.5388850  |
| C | 3.9406520  | -1.5713970 | 1.7968740  |
| C | 4.9100910  | -1.5764010 | 0.7100410  |
| O | 6.1167420  | -1.6519880 | 0.8216860  |
| O | 2.5663770  | -1.2390280 | -1.9924310 |
| O | -1.8761990 | -1.4229570 | -0.9819100 |
| C | -2.9866250 | -2.2074210 | -0.9599750 |
| C | -3.4450390 | -2.5271140 | -2.3491980 |
| O | -3.5057970 | -2.5720170 | 0.0646820  |
| H | -1.8782310 | 0.9131800  | -1.1789320 |
| H | -2.4903170 | -0.6719790 | 0.8480210  |
| H | 0.5351760  | -1.6828030 | -0.9514830 |
| H | -0.9582280 | 1.8868830  | 1.5731630  |
| H | -2.6225360 | 1.8122900  | 0.9567680  |
| H | -1.4913300 | 5.0883100  | -0.0096100 |
| H | -2.7886650 | 4.2053250  | 0.8445550  |
| H | -1.1597980 | 4.3252330  | 1.5710720  |
| H | 0.3338970  | -3.2120200 | 1.6490680  |
| H | -1.4172400 | -2.9684900 | 1.8089420  |
| H | -0.7135240 | -3.3182360 | 0.2204980  |
| H | 0.0954760  | -1.2554760 | 3.0853220  |
| H | 0.3717760  | 0.3072790  | 2.3179710  |
| H | -1.2686110 | -0.2560520 | 2.6389460  |
| H | 4.9474150  | -1.4714390 | -1.3533260 |
| H | 1.9015020  | -1.4010860 | 2.3315270  |
| H | 4.2990740  | -1.6882650 | 2.8099630  |
| H | -2.5960840 | -2.7266860 | -3.0052290 |
| H | -4.1269600 | -3.3759600 | -2.3283920 |
| H | -3.9678780 | -1.6386890 | -2.7167600 |
| O | -4.1163210 | 0.3561260  | -0.9574350 |
| S | -5.0372570 | 0.5753410  | 0.1915630  |
| O | -5.7909760 | 1.8416570  | 0.1016640  |
| O | -4.3524130 | 0.3905550  | 1.4985420  |
| C | -6.2443520 | -0.7380600 | 0.0873470  |
| H | -5.7173140 | -1.6917160 | 0.1421540  |
| H | -6.9444380 | -0.6375530 | 0.9179020  |
| H | -6.7742190 | -0.6474990 | -0.8621680 |
| S | 0.4680580  | 0.6485370  | -0.8647200 |
| C | 1.4585840  | 1.8396810  | 0.1242300  |
| H | 1.0134070  | 2.8003930  | -0.1526020 |
| H | 1.2873100  | 1.6762920  | 1.1879690  |
| C | 2.9250460  | 1.7446600  | -0.2199880 |
| C | 3.3711390  | 1.7997310  | -1.5439330 |
| C | 3.8577510  | 1.6440670  | 0.8155770  |
| C | 4.7329160  | 1.7390340  | -1.8242670 |
| H | 2.6557680  | 1.8774210  | -2.3584780 |
| C | 5.2216580  | 1.6052670  | 0.5341320  |
| H | 3.5165260  | 1.6015870  | 1.8467190  |
| C | 5.6602190  | 1.6431370  | -0.7868710 |
| H | 5.0695500  | 1.7721380  | -2.8552870 |
| H | 5.9369600  | 1.5235870  | 1.3461310  |

|   |           |           |            |
|---|-----------|-----------|------------|
| H | 6.7215020 | 1.5963990 | -1.0085400 |
|---|-----------|-----------|------------|

**52a'**

SCF energy: – 1711.11273199 hartree  
Free energy correction: + 0.354407 hartree  
imaginary frequency: none

|   |            |            |            |
|---|------------|------------|------------|
| C | -1.3021630 | 0.9221300  | -0.8833030 |
| C | -0.3220210 | 1.9132990  | -1.5273220 |
| C | 1.1304160  | 1.4530290  | -1.2967980 |
| C | 1.1481840  | 1.1098130  | 0.2099440  |
| C | -1.9566290 | -0.1450440 | -1.7478270 |
| O | -2.8225390 | -0.8200100 | -0.8782280 |
| C | -3.4807510 | -1.9100740 | -1.4967430 |
| C | 2.1429950  | 2.5724800  | -1.5527380 |
| C | 1.4522900  | 0.2558500  | -2.1952060 |
| N | 4.2982670  | 0.6390080  | 1.9561140  |
| C | 3.1673310  | 1.2744640  | 1.5131250  |
| N | 2.3264650  | 0.4680050  | 0.7308270  |
| C | 2.6328420  | -0.8617280 | 0.4741210  |
| C | 3.7501260  | -1.4481320 | 0.9330940  |
| C | 4.6997990  | -0.6875790 | 1.7315520  |
| O | 5.7458420  | -1.0943420 | 2.1955450  |
| O | 2.9123780  | 2.4372040  | 1.7617630  |
| O | -0.5452360 | 3.1519450  | -0.8439500 |
| C | -0.5223680 | 4.2901260  | -1.5909630 |
| C | -0.7554470 | 5.4937320  | -0.7261440 |
| O | -0.3308350 | 4.2860710  | -2.7790960 |
| H | -2.1113620 | 1.4769300  | -0.4004830 |
| H | -0.5326080 | 2.0411730  | -2.5926860 |
| H | 1.0182680  | 2.0322510  | 0.7802330  |
| H | -1.2317420 | -0.8367280 | -2.1983550 |
| H | -2.5065300 | 0.3639430  | -2.5549680 |
| H | -4.0959140 | -2.3806130 | -0.7290550 |
| H | -4.1220700 | -1.5609980 | -2.3166900 |
| H | -2.7532750 | -2.6353900 | -1.8793810 |
| H | 3.1557850  | 2.1997350  | -1.3722750 |
| H | 2.0793770  | 2.9007960  | -2.5936060 |
| H | 1.9775750  | 3.4309430  | -0.8966340 |
| H | 2.5046040  | -0.0245580 | -2.0906810 |
| H | 0.8537770  | -0.6368110 | -1.9814920 |
| H | 1.2873670  | 0.5330290  | -3.2408210 |
| H | 4.9240920  | 1.2123070  | 2.5134030  |
| H | 1.8987760  | -1.4219180 | -0.1027160 |
| H | 3.9544120  | -2.4901370 | 0.7289910  |
| H | 0.0660690  | 5.5894030  | -0.0106170 |
| H | -0.8080340 | 6.3832920  | -1.3509550 |
| H | -1.6807310 | 5.3710110  | -0.1587030 |
| S | -0.3895910 | 0.1004740  | 0.4953530  |
| C | -1.1176030 | 0.9138620  | 1.9833630  |
| H | -0.4566920 | 0.6179250  | 2.8021500  |
| H | -1.0552990 | 1.9934870  | 1.8261670  |
| C | -2.5282780 | 0.4306500  | 2.1547940  |
| C | -2.7801240 | -0.8943450 | 2.5226900  |
| C | -3.5940100 | 1.2944140  | 1.8972810  |

|   |            |            |            |
|---|------------|------------|------------|
| C | -4.0890060 | -1.3488820 | 2.6297460  |
| H | -1.9513020 | -1.5704800 | 2.7177290  |
| C | -4.9054050 | 0.8381840  | 2.0114190  |
| H | -3.3999350 | 2.3277420  | 1.6201520  |
| C | -5.1528330 | -0.4832380 | 2.3721820  |
| H | -4.2800190 | -2.3783570 | 2.9136290  |
| H | -5.7304550 | 1.5151270  | 1.8163040  |
| H | -6.1740420 | -0.8403350 | 2.4564650  |
| I | 0.2575340  | -3.5123480 | -1.1431170 |

**TS B**

SCF energy: – 1711.08638339 hartree

Free energy correction: + 0.353594 hartree

imaginary frequency: – 385.4i cm<sup>-1</sup>

|   |            |            |            |
|---|------------|------------|------------|
| C | -0.0395890 | 2.1288570  | 0.4165080  |
| C | 0.7151970  | 1.7517310  | 1.6974310  |
| C | 2.0832670  | 1.1391640  | 1.3467320  |
| C | 1.7310260  | 0.1201070  | 0.2367030  |
| C | 0.0492900  | 3.5610410  | -0.0883560 |
| O | -0.8124020 | 3.6212860  | -1.1943650 |
| C | -0.8244770 | 4.8951600  | -1.8025730 |
| C | 2.7110020  | 0.4036260  | 2.5341850  |
| C | 3.0473250  | 2.2297860  | 0.8711670  |
| N | 4.3260690  | -2.2011810 | -0.8623490 |
| C | 3.2529840  | -1.7251760 | -0.1471780 |
| N | 2.8518230  | -0.4308490 | -0.5050660 |
| C | 3.5006210  | 0.2633900  | -1.5097510 |
| C | 4.5498100  | -0.2324730 | -2.1875140 |
| C | 5.0487640  | -1.5638450 | -1.8785030 |
| O | 5.9859140  | -2.1247260 | -2.4123480 |
| O | 2.7050320  | -2.3660310 | 0.7277730  |
| O | -0.1025220 | 0.7462360  | 2.3147500  |
| C | -0.2272720 | 0.7730900  | 3.6676940  |
| C | -1.1009100 | -0.3526660 | 4.1384260  |
| O | 0.3074150  | 1.6038060  | 4.3568040  |
| H | -1.1044260 | 1.9406510  | 0.5790630  |
| H | 0.8156350  | 2.6030230  | 2.3767880  |
| H | 1.2377320  | -0.7368860 | 0.6990530  |
| H | 1.0683680  | 3.8552570  | -0.3729110 |
| H | -0.2877580 | 4.2360990  | 0.7141840  |
| H | -1.5193890 | 4.8427680  | -2.6411610 |
| H | -1.1629900 | 5.6656800  | -1.0975810 |
| H | 0.1731630  | 5.1665590  | -2.1722670 |
| H | 3.6773240  | -0.0172390 | 2.2401980  |
| H | 2.8767100  | 1.0986400  | 3.3620710  |
| H | 2.0821910  | -0.4199200 | 2.8815850  |
| H | 4.0376020  | 1.8042680  | 0.6839820  |
| H | 2.7194490  | 2.7291480  | -0.0440200 |
| H | 3.1560120  | 2.9897360  | 1.6508200  |
| H | 4.6279960  | -3.1369880 | -0.6093100 |
| H | 3.0904310  | 1.2412630  | -1.7309630 |
| H | 5.0298260  | 0.3321000  | -2.9739860 |
| H | -2.0894070 | -0.2706630 | 3.6792080  |
| H | -0.6699110 | -1.3070910 | 3.8243850  |

|   |            |            |            |
|---|------------|------------|------------|
| H | -1.1859580 | -0.3172300 | 5.2229310  |
| S | 0.4950700  | 0.9347920  | -0.8690550 |
| C | -1.2790330 | -0.6168130 | -0.6258340 |
| H | -0.7824210 | -1.2923800 | -1.3089420 |
| H | -1.0629290 | -0.7056050 | 0.4328000  |
| C | -2.3876170 | 0.2150550  | -1.0776830 |
| C | -2.6059550 | 0.4161030  | -2.4476920 |
| C | -3.2036490 | 0.8679180  | -0.1417390 |
| C | -3.6196540 | 1.2642290  | -2.8726400 |
| H | -1.9727140 | -0.0916440 | -3.1700240 |
| C | -4.2194550 | 1.7127490  | -0.5706250 |
| H | -3.0495540 | 0.6828390  | 0.9187920  |
| C | -4.4247980 | 1.9141840  | -1.9354720 |
| H | -3.7859380 | 1.4196930  | -3.9332510 |
| H | -4.8538000 | 2.2093910  | 0.1556570  |
| H | -5.2179020 | 2.5746400  | -2.2706800 |
| I | -2.7400460 | -3.0276310 | 0.0056550  |

## 54

SCF energy: – 2363.37282132 hartree  
 Free energy correction: + 0.406457 hartree  
 imaginary frequency: none

|   |            |            |            |
|---|------------|------------|------------|
| C | -3.1550960 | -0.2303180 | 0.2261140  |
| C | -1.6673560 | -0.6432030 | 0.2929290  |
| C | -0.8828300 | -1.0513230 | -0.9671730 |
| C | 0.6516210  | -1.0875850 | -0.6660140 |
| C | -4.1570950 | -1.1848060 | -0.4008600 |
| O | -4.1191170 | -1.1044090 | -1.8012650 |
| C | -5.0261220 | -2.0061880 | -2.3996310 |
| C | -1.0967210 | -0.0004320 | -2.0688890 |
| C | -1.2882840 | -2.4347390 | -1.4946550 |
| N | 2.6488480  | 1.9713600  | -1.0201850 |
| C | 1.9792400  | 0.8289990  | -1.3923360 |
| N | 1.2402860  | 0.2325890  | -0.3708320 |
| C | 1.2271030  | 0.7795470  | 0.8954280  |
| C | 1.8905560  | 1.9020200  | 1.2284630  |
| C | 2.7174780  | 2.5681860  | 0.2412910  |
| O | 3.4266860  | 3.5435000  | 0.4213680  |
| O | 2.0385790  | 0.3849830  | -2.5258840 |
| O | -1.6279430 | -1.7444960 | 1.2166680  |
| C | -1.4203720 | -1.4617910 | 2.5238480  |
| C | -1.3733060 | -2.7190420 | 3.3412650  |
| O | -1.2807120 | -0.3360910 | 2.9399520  |
| H | -3.4540740 | -0.1091100 | 1.2751530  |
| H | -1.1665120 | 0.2126840  | 0.7485180  |
| H | 1.1249270  | -1.3889280 | -1.6029340 |
| H | -5.1618410 | -0.9191550 | -0.0409620 |
| H | -3.9275050 | -2.2030160 | -0.0479540 |
| H | -4.7719940 | -3.0456490 | -2.1498130 |
| H | -6.0544830 | -1.8050790 | -2.0713870 |
| H | -4.9561680 | -1.8664250 | -3.4787770 |
| H | -0.4395770 | -0.2185330 | -2.9151220 |
| H | -2.1346300 | -0.0271440 | -2.4042750 |
| H | -0.8738840 | 1.0090290  | -1.7086750 |



|   |            |            |            |
|---|------------|------------|------------|
| H | -2.2986110 | -2.3932910 | -1.9045020 |
| H | -0.6101270 | -2.7300800 | -2.3030110 |
| H | -1.2423890 | -3.1972800 | -0.7152620 |
| H | 3.2323850  | 2.3762880  | -1.7445390 |
| H | 0.6589100  | 0.2284930  | 1.6354280  |
| H | 1.8545460  | 2.2977300  | 2.2335950  |
| H | -1.3040390 | -2.4652920 | 4.3974900  |
| H | -2.2634270 | -3.3221370 | 3.1496800  |
| H | -0.5000470 | -3.3041160 | 3.0381180  |
| O | -1.4963870 | 2.5697750  | 0.3578220  |
| S | -2.9360500 | 2.3667560  | 0.4144890  |
| O | -3.5795940 | 2.2870080  | 1.7155860  |
| O | -3.3204420 | 1.0421770  | -0.4321760 |
| C | -3.7537860 | 3.5399850  | -0.6278610 |
| H | -4.8208110 | 3.3206940  | -0.6246760 |
| H | -3.5559980 | 4.5269550  | -0.2077480 |
| H | -3.3329450 | 3.4562780  | -1.6298380 |
| S | 1.1683250  | -2.3302450 | 0.5793980  |
| C | 2.8668230  | -2.6695360 | -0.0187590 |
| H | 3.2268870  | -3.4372460 | 0.6740940  |
| H | 2.7924970  | -3.1304560 | -1.0079160 |
| C | 3.8196770  | -1.4989800 | -0.0556230 |
| C | 4.4502940  | -1.1534890 | -1.2525150 |
| C | 4.1124130  | -0.7646540 | 1.0982580  |
| C | 5.3587510  | -0.0961700 | -1.2982610 |
| H | 4.2200870  | -1.7083190 | -2.1582160 |
| C | 5.0158190  | 0.2920170  | 1.0550730  |
| H | 3.6125570  | -1.0153170 | 2.0312790  |
| C | 5.6436920  | 0.6289060  | -0.1448480 |
| H | 5.8361930  | 0.1623040  | -2.2385390 |
| H | 5.2237170  | 0.8612750  | 1.9560880  |
| H | 6.3424470  | 1.4590320  | -0.1784010 |

**TS C1**

SCF energy: – 2363.31248363 hartree

Free energy correction: + 0.404438 hartree

imaginary frequency: – 526.9i cm<sup>-1</sup>

|   |            |            |            |
|---|------------|------------|------------|
| C | 0.6500100  | -1.2666490 | 0.6302540  |
| C | 1.3537270  | -0.0394730 | 1.1804070  |
| C | 0.4929200  | 1.0397550  | 1.8804660  |
| C | -0.7167960 | 1.4545900  | 0.9924820  |
| C | -0.0325580 | -2.3443390 | 1.4478390  |
| O | -1.0453150 | -2.9822610 | 0.7196960  |
| C | -0.5636660 | -3.8359460 | -0.3085260 |
| C | 1.3890700  | 2.2464540  | 2.1889850  |
| C | -0.0715940 | 0.5133940  | 3.2097020  |
| N | -0.5508480 | 4.8408460  | -0.3722270 |
| C | -0.8277300 | 3.8237020  | 0.5090910  |
| N | -0.4670260 | 2.5523900  | 0.0569560  |
| C | 0.1017300  | 2.3761070  | -1.1883190 |
| C | 0.3634640  | 3.3945490  | -2.0279650 |
| C | 0.0384510  | 4.7570790  | -1.6405910 |
| O | 0.2250420  | 5.7626070  | -2.2986950 |
| O | -1.3382990 | 4.0158620  | 1.5979460  |

|   |            |            |            |
|---|------------|------------|------------|
| O | 1.9719900  | 0.5545150  | 0.0401030  |
| C | 3.3222660  | 0.6764770  | 0.0204870  |
| C | 3.7791410  | 1.1575460  | -1.3243580 |
| O | 4.0212110  | 0.4189050  | 0.9678350  |
| H | 0.6827650  | -1.3776260 | -0.4455130 |
| H | 2.1252660  | -0.3704910 | 1.8815660  |
| H | -1.5068000 | 1.8256590  | 1.6475220  |
| H | -0.4964150 | -1.9295580 | 2.3434200  |
| H | 0.7391090  | -3.0517360 | 1.7711150  |
| H | -1.4352550 | -4.3533750 | -0.7118530 |
| H | -0.0783460 | -3.2743690 | -1.1161390 |
| H | 0.1556400  | -4.5599860 | 0.0896730  |
| H | 0.8043440  | 3.0228900  | 2.6893760  |
| H | 2.2025520  | 1.9407730  | 2.8537890  |
| H | 1.8268410  | 2.6732150  | 1.2831620  |
| H | -0.4220710 | 1.3589730  | 3.8083780  |
| H | -0.9233220 | -0.1583630 | 3.0799090  |
| H | 0.6979960  | -0.0116120 | 3.7834550  |
| H | -0.8046870 | 5.7694370  | -0.0498190 |
| H | 0.3353470  | 1.3533520  | -1.4550720 |
| H | 0.8005920  | 3.2205160  | -3.0012070 |
| H | 3.2169280  | 2.0503450  | -1.6115470 |
| H | 4.8459530  | 1.3738110  | -1.2941490 |
| H | 3.5649930  | 0.3688960  | -2.0523800 |
| O | 2.4377920  | -1.8299110 | -1.8574340 |
| S | 2.9417790  | -2.7309120 | -0.8018830 |
| O | 2.6955340  | -4.1602030 | -1.0269580 |
| O | 2.4488100  | -2.2724290 | 0.5634480  |
| C | 4.7077890  | -2.5127260 | -0.7025350 |
| H | 4.9249680  | -1.4734430 | -0.4545490 |
| H | 5.0906080  | -3.1720520 | 0.0770940  |
| H | 5.1347360  | -2.7814710 | -1.6697450 |
| S | -1.3769010 | -0.0079960 | 0.1079720  |
| C | -2.8314840 | -0.5239370 | 1.1163300  |
| H | -2.5062690 | -1.2672460 | 1.8469360  |
| H | -3.1822530 | 0.3707270  | 1.6371970  |
| C | -3.8931670 | -1.0910380 | 0.2119880  |
| C | -4.0844610 | -2.4709360 | 0.1267440  |
| C | -4.6956520 | -0.2359250 | -0.5491490 |
| C | -5.0738500 | -2.9896520 | -0.7066690 |
| H | -3.4523030 | -3.1315760 | 0.7122930  |
| C | -5.6817310 | -0.7543540 | -1.3811130 |
| H | -4.5457110 | 0.8394030  | -0.4864180 |
| C | -5.8720830 | -2.1339890 | -1.4611400 |
| H | -5.2194530 | -4.0637020 | -0.7655360 |
| H | -6.3034280 | -0.0834420 | -1.9653580 |
| H | -6.6421770 | -2.5389100 | -2.1101260 |

**55a**

SCF energy: – 2363.34258345 hartree  
Free energy correction: + 0.404624 hartree  
imaginary frequency: none

|   |           |            |           |
|---|-----------|------------|-----------|
| C | 0.7113570 | -0.8068080 | 0.7155410 |
|---|-----------|------------|-----------|

|   |            |            |            |
|---|------------|------------|------------|
| C | 1.1050100  | 0.5604120  | 1.2844080  |
| C | -0.1012230 | 1.2459580  | 1.9488510  |
| C | -1.3225390 | 1.0256560  | 1.0103220  |
| C | 0.9493060  | -2.0398680 | 1.5820250  |
| O | 0.5074440  | -3.1993900 | 0.9201320  |
| C | 1.3961710  | -3.6433420 | -0.1005220 |
| C | 0.1544740  | 2.7374030  | 2.1742720  |
| C | -0.4220740 | 0.5760690  | 3.2920430  |
| N | -2.8307570 | 3.9529500  | -0.5339370 |
| C | -2.5983060 | 2.9648420  | 0.3881380  |
| N | -1.6020240 | 2.0506560  | 0.0192160  |
| C | -0.9256050 | 2.1763960  | -1.1831290 |
| C | -1.1760730 | 3.1635350  | -2.0594570 |
| C | -2.1934100 | 4.1617620  | -1.7654440 |
| O | -2.5100440 | 5.0996650  | -2.4689420 |
| O | -3.1959850 | 2.8858800  | 1.4450100  |
| O | 1.5017500  | 1.3392870  | 0.1595980  |
| C | 2.6952610  | 1.9844680  | 0.1951710  |
| C | 2.9676260  | 2.6236740  | -1.1346720 |
| O | 3.3936610  | 2.0253130  | 1.1748730  |
| H | 1.2477170  | -0.9268410 | -0.2310490 |
| H | 1.9518130  | 0.4537250  | 1.9684250  |
| H | -2.2358210 | 0.9471170  | 1.6021100  |
| H | 0.4285410  | -1.9938510 | 2.5413770  |
| H | 2.0291860  | -2.0642720 | 1.7663430  |
| H | 0.9900390  | -4.5839800 | -0.4752010 |
| H | 1.4665470  | -2.9263560 | -0.9270380 |
| H | 2.4023800  | -3.7998370 | 0.3010570  |
| H | -0.7217250 | 3.2041140  | 2.6333350  |
| H | 1.0072010  | 2.8593880  | 2.8484560  |
| H | 0.3777830  | 3.2572670  | 1.2394350  |
| H | -1.2044320 | 1.1415030  | 3.8062800  |
| H | -0.7803580 | -0.4519640 | 3.1836070  |
| H | 0.4653290  | 0.5577910  | 3.9306260  |
| H | -3.5468460 | 4.6243450  | -0.2736450 |
| H | -0.1676840 | 1.4283730  | -1.3780550 |
| H | -0.6406910 | 3.2287220  | -2.9962250 |
| H | 2.1333240  | 3.2772670  | -1.4062730 |
| H | 3.8918430  | 3.1978970  | -1.0855790 |
| H | 3.0400150  | 1.8270440  | -1.8810930 |
| O | 2.8532660  | -0.5943800 | -1.7147560 |
| S | 3.9319650  | -1.1802240 | -0.8733100 |
| O | 4.3493640  | -2.5267660 | -1.3115920 |
| O | 3.6125750  | -1.0963170 | 0.5751270  |
| C | 5.3565940  | -0.1218360 | -1.0982660 |
| H | 5.1267280  | 0.8678930  | -0.7000080 |
| H | 6.1947110  | -0.5530400 | -0.5490660 |
| H | 5.5929750  | -0.0629640 | -2.1615380 |
| S | -1.0726480 | -0.6188130 | 0.1825130  |
| C | -2.1555200 | -1.7854550 | 1.1573370  |
| H | -1.5062250 | -2.3627250 | 1.8138890  |

|   |            |            |            |
|---|------------|------------|------------|
| H | -2.8088950 | -1.1411710 | 1.7490370  |
| C | -2.9204780 | -2.6598450 | 0.2073600  |
| C | -2.4623020 | -3.9464130 | -0.0838930 |
| C | -4.0902400 | -2.1841090 | -0.3910990 |
| C | -3.1776280 | -4.7536070 | -0.9646820 |
| H | -1.5510490 | -4.3052250 | 0.3849700  |
| C | -4.8000170 | -2.9915320 | -1.2734400 |
| H | -4.4481020 | -1.1834810 | -0.1606440 |
| C | -4.3433770 | -4.2773390 | -1.5605920 |
| H | -2.8234640 | -5.7553860 | -1.1850100 |
| H | -5.7101940 | -2.6201160 | -1.7327150 |
| H | -4.8985400 | -4.9083370 | -2.2472350 |

**56**

SCF energy: – 1428.95036069 hartree  
Free energy correction: + 0.259049 hartree  
imaginary frequency: none

|   |            |            |            |
|---|------------|------------|------------|
| C | 1.9218940  | 0.0529620  | -0.3692540 |
| C | 1.2002120  | 0.4248910  | 0.9386360  |
| C | 0.3246990  | -0.7445680 | 1.4231530  |
| C | -0.2764090 | -1.4028360 | 0.1516840  |
| C | 3.3997830  | -0.2488950 | -0.1939270 |
| O | 3.9097330  | -0.5821820 | -1.4598410 |
| C | 5.2753780  | -0.9311530 | -1.4082800 |
| C | -0.7492430 | -0.2786320 | 2.4095850  |
| C | 1.2135610  | -1.7851210 | 2.1211930  |
| N | -3.8658420 | -0.7389480 | -0.2217060 |
| C | -2.7085550 | -1.3710480 | 0.1755380  |
| N | -1.5380930 | -0.7905780 | -0.3082860 |
| C | -1.5849400 | 0.3140430  | -1.1255840 |
| C | -2.7315070 | 0.9186220  | -1.4931520 |
| C | -4.0033640 | 0.3966310  | -1.0287670 |
| O | -5.1090840 | 0.8420160  | -1.2798500 |
| O | -2.7158380 | -2.3534840 | 0.8960870  |
| O | 0.3373390  | 1.5474650  | 0.7055640  |
| C | 0.9408750  | 2.7490100  | 0.5837300  |
| C | -0.0714870 | 3.8410370  | 0.3876810  |
| O | 2.1396330  | 2.8855060  | 0.6377570  |
| H | 1.8489600  | 0.8887040  | -1.0701130 |
| H | 1.9267080  | 0.7100050  | 1.7076910  |
| H | -0.5311590 | -2.4411960 | 0.3634470  |
| H | 3.5589960  | -1.0743660 | 0.5168290  |
| H | 3.8943400  | 0.6511240  | 0.2052300  |
| H | 5.5877620  | -1.1718880 | -2.4251790 |
| H | 5.8827720  | -0.0977400 | -1.0303120 |
| H | 5.4361030  | -1.8053350 | -0.7629240 |
| H | -1.3328930 | -1.1357360 | 2.7548880  |
| H | -0.2711070 | 0.1876770  | 3.2770980  |
| H | -1.4259900 | 0.4529580  | 1.9636520  |
| H | 0.5900920  | -2.5976600 | 2.5062340  |
| H | 1.9533390  | -2.2220600 | 1.4459440  |
| H | 1.7370600  | -1.3295240 | 2.9672010  |

|   |            |            |            |
|---|------------|------------|------------|
| H | -4.7231610 | -1.1549310 | 0.1274870  |
| H | -0.6216940 | 0.6640100  | -1.4728640 |
| H | -2.7297870 | 1.7787690  | -2.1477460 |
| H | -0.6609970 | 3.9537940  | 1.3016550  |
| H | 0.4381450  | 4.7753190  | 0.1589960  |
| H | -0.7581490 | 3.5713090  | -0.4184620 |
| S | 1.0392850  | -1.3887990 | -1.1056230 |

**TS C2**

SCF energy: – 2363.30766454 hartree

Free energy correction: + 0.400234 hartree

imaginary frequency: – 541.1i cm<sup>–1</sup>

|   |            |            |            |
|---|------------|------------|------------|
| C | -0.1093760 | -1.2523040 | 0.8602400  |
| C | 1.2047870  | -0.7632580 | 1.4614870  |
| C | 1.1698000  | 0.6263430  | 2.1604240  |
| C | 0.3669780  | 1.6588450  | 1.3252720  |
| C | -1.1911740 | -1.9665670 | 1.6332860  |
| O | -2.3472900 | -1.8932180 | 0.8451240  |
| C | -3.4682880 | -2.4882740 | 1.4654060  |
| C | 2.6029190  | 1.1314090  | 2.3649190  |
| C | 0.5074720  | 0.5000980  | 3.5427950  |
| N | 2.1478170  | 3.9777850  | -0.8629120 |
| C | 1.5058680  | 3.5039500  | 0.2555190  |
| N | 1.0190480  | 2.1925890  | 0.1367400  |
| C | 1.2182680  | 1.4739000  | -1.0309720 |
| C | 1.8592130  | 1.9693850  | -2.1039490 |
| C | 2.3903890  | 3.3208090  | -2.0763240 |
| O | 2.9892680  | 3.8857410  | -2.9711260 |
| O | 1.3789120  | 4.1687730  | 1.2659630  |
| O | 2.1323000  | -0.6790210 | 0.3897430  |
| C | 3.2477250  | -1.4442190 | 0.4184660  |
| C | 4.0220430  | -1.2413080 | -0.8530150 |
| O | 3.5551720  | -2.1446420 | 1.3484770  |
| H | -0.2733650 | -1.1077030 | -0.1986030 |
| H | 1.5556920  | -1.5094920 | 2.1818270  |
| H | 0.1911420  | 2.5294980  | 1.9566620  |
| H | -1.3512030 | -1.5035570 | 2.6168890  |
| H | -0.8789930 | -3.0040710 | 1.7952140  |
| H | -4.3135280 | -2.3471520 | 0.7904470  |
| H | -3.3046830 | -3.5602280 | 1.6314310  |
| H | -3.6873800 | -2.0041450 | 2.4262970  |
| H | 2.5862890  | 2.0728520  | 2.9214270  |
| H | 3.1771800  | 0.3976050  | 2.9394390  |
| H | 3.1142100  | 1.2999510  | 1.4144950  |
| H | 0.5427520  | 1.4649130  | 4.0570860  |
| H | -0.5389210 | 0.1875090  | 3.5051620  |
| H | 1.0549670  | -0.2269130 | 4.1494230  |
| H | 2.5041590  | 4.9248520  | -0.7806490 |
| H | 0.8398450  | 0.4606010  | -1.0444570 |
| H | 1.9838700  | 1.3754290  | -2.9985780 |
| H | 4.3888230  | -0.2106400 | -0.8866130 |
| H | 4.8638260  | -1.9316240 | -0.8895940 |
| H | 3.3523350  | -1.3837440 | -1.7058690 |
| O | 0.8270170  | -1.9528700 | -1.9743770 |

|   |            |            |            |
|---|------------|------------|------------|
| S | 0.6463610  | -3.2242140 | -1.2419310 |
| O | -0.5571960 | -3.9823370 | -1.5982620 |
| O | 0.7630650  | -2.9946580 | 0.2604720  |
| C | 2.0503220  | -4.2623430 | -1.5958320 |
| H | 2.9582510  | -3.7651730 | -1.2537040 |
| H | 1.9177260  | -5.2075600 | -1.0689740 |
| H | 2.0855230  | -4.4285620 | -2.6733990 |
| S | -1.2696230 | 0.8620080  | 1.0382860  |
| C | -1.8201810 | 1.3124520  | -0.6543190 |
| H | -1.5069960 | 2.3442460  | -0.8346150 |
| H | -1.3322140 | 0.6564620  | -1.3797990 |
| C | -3.3168140 | 1.1607020  | -0.7208320 |
| C | -4.1505810 | 2.2196830  | -0.3545440 |
| C | -3.8791340 | -0.0477240 | -1.1372860 |
| C | -5.5335120 | 2.0760110  | -0.4126530 |
| H | -3.7128190 | 3.1596070  | -0.0274290 |
| C | -5.2636260 | -0.1906220 | -1.1951050 |
| H | -3.2304600 | -0.8770170 | -1.4064610 |
| C | -6.0918470 | 0.8698870  | -0.8333840 |
| H | -6.1747850 | 2.9058240  | -0.1330960 |
| H | -5.6941350 | -1.1305290 | -1.5266480 |
| H | -7.1704590 | 0.7581880  | -0.8814680 |

**55b**

SCF energy: – 2363.35492938 hartree

Free energy correction: + 0.404494 hartree

imaginary frequency: none

|   |            |            |            |
|---|------------|------------|------------|
| C | 0.3076340  | 0.6524900  | 1.3191440  |
| C | -1.0126760 | 1.2748840  | 1.8107960  |
| C | -2.0542920 | 0.1775630  | 2.1467590  |
| C | -1.7269580 | -1.1204380 | 1.3640110  |
| C | 1.5674230  | 1.1038260  | 2.0261710  |
| O | 2.5918730  | 0.3027110  | 1.5005490  |
| C | 3.8869700  | 0.8320860  | 1.6962850  |
| C | -3.4903430 | 0.6249550  | 1.8771860  |
| C | -1.8901940 | -0.1524270 | 3.6429200  |
| N | -3.5239450 | -2.5461000 | -1.4584570 |
| C | -2.9886510 | -2.4610940 | -0.1990020 |
| N | -2.2692690 | -1.2763610 | 0.0430600  |
| C | -2.0861730 | -0.3333310 | -0.9606200 |
| C | -2.6043310 | -0.4701690 | -2.1909530 |
| C | -3.4079400 | -1.6370940 | -2.5214630 |
| O | -3.9459840 | -1.8692980 | -3.5850090 |
| O | -3.1237650 | -3.3291210 | 0.6402810  |
| O | -1.4911190 | 2.1390210  | 0.7861610  |
| C | -1.0327110 | 3.4234340  | 0.8187400  |
| C | -1.5288070 | 4.1940580  | -0.3673360 |
| O | -0.3764350 | 3.8557460  | 1.7305820  |
| H | 0.4261390  | 0.8649700  | 0.2532190  |
| H | -0.8310690 | 1.8801770  | 2.7028360  |
| H | -2.0597330 | -1.9936040 | 1.9246870  |
| H | 1.4922840  | 0.9934650  | 3.1197570  |
| H | 1.7060900  | 2.1646230  | 1.7782320  |
| H | 4.5862540  | 0.1185760  | 1.2575310  |

|   |            |            |            |
|---|------------|------------|------------|
| H | 3.9857290  | 1.7999480  | 1.1896690  |
| H | 4.1081130  | 0.9545590  | 2.7644250  |
| H | -4.1882780 | -0.1667880 | 2.1660910  |
| H | -3.7101050 | 1.5132080  | 2.4762560  |
| H | -3.6537520 | 0.8762060  | 0.8277050  |
| H | -2.5492400 | -0.9761860 | 3.9300060  |
| H | -0.8622620 | -0.4325100 | 3.9028370  |
| H | -2.1537760 | 0.7241010  | 4.2402000  |
| H | -4.0555810 | -3.3915660 | -1.6420350 |
| H | -1.4748160 | 0.5260840  | -0.7099090 |
| H | -2.4170600 | 0.2719400  | -2.9542260 |
| H | -2.5082310 | 4.6215170  | -0.1310060 |
| H | -0.8271280 | 4.9986020  | -0.5827780 |
| H | -1.6318350 | 3.5342430  | -1.2294570 |
| O | 0.4674460  | 0.9342540  | -1.8985660 |
| S | 1.4260550  | 2.0778590  | -1.8340050 |
| O | 2.8267490  | 1.6726760  | -2.0657810 |
| O | 1.2304610  | 2.8875510  | -0.6062970 |
| C | 0.9833800  | 3.1369280  | -3.2035240 |
| H | -0.0523630 | 3.4568070  | -3.0835990 |
| H | 1.6472820  | 4.0023690  | -3.2018680 |
| H | 1.0995930  | 2.5733730  | -4.1299870 |
| S | 0.1497970  | -1.1824000 | 1.4305980  |
| C | 0.6365810  | -1.8323900 | -0.2303710 |
| H | -0.0468550 | -2.6743970 | -0.3800420 |
| H | 0.4409470  | -1.0384380 | -0.9586490 |
| C | 2.0741690  | -2.2655410 | -0.2417980 |
| C | 2.4573670  | -3.4728140 | 0.3465740  |
| C | 3.0260020  | -1.4558630 | -0.8638570 |
| C | 3.7900930  | -3.8714380 | 0.3152210  |
| H | 1.7112560  | -4.1033430 | 0.8250030  |
| C | 4.3576070  | -1.8627060 | -0.8995090 |
| H | 2.7290360  | -0.5087650 | -1.3094470 |
| C | 4.7415010  | -3.0656590 | -0.3092540 |
| H | 4.0844820  | -4.8112900 | 0.7711510  |
| H | 5.0952830  | -1.2336140 | -1.3881840 |
| H | 5.7807480  | -3.3782690 | -0.3382040 |

**58**

SCF energy: – 2363.37590039 hartree  
 Free energy correction: + 0.409645 hartree  
 imaginary frequency: none

|   |            |            |            |
|---|------------|------------|------------|
| C | -3.0217080 | -0.3876530 | -0.1391600 |
| C | -1.5024370 | -0.4126390 | 0.0979440  |
| C | -0.7609030 | -1.7580110 | -0.0990050 |
| C | 0.7272200  | -1.4127030 | -0.4470960 |
| C | -3.8993050 | -1.1611920 | 0.8428270  |
| O | -4.0248570 | -2.4856790 | 0.3881160  |
| C | -4.7711350 | -3.2802210 | 1.2868610  |
| C | -1.3247990 | -2.4739640 | -1.3376200 |
| C | -0.9043350 | -2.6671940 | 1.1289610  |
| N | 2.2627880  | 1.8607510  | 0.1487580  |
| C | 1.5719540  | 0.8790250  | -0.5198680 |
| N | 1.2843320  | -0.2494520 | 0.2522320  |

|   |            |            |            |
|---|------------|------------|------------|
| C | 1.6305390  | -0.3070910 | 1.5812330  |
| C | 2.2420410  | 0.7030260  | 2.2279970  |
| C | 2.6344890  | 1.8946290  | 1.4915470  |
| O | 3.2394270  | 2.8513850  | 1.9436880  |
| O | 1.2522360  | 0.9813620  | -1.6899620 |
| O | -1.3094230 | 0.0442290  | 1.4449010  |
| C | -0.9697540 | 1.3398640  | 1.6410030  |
| C | -0.9862070 | 1.6794930  | 3.1044800  |
| O | -0.7035240 | 2.1042530  | 0.7467470  |
| H | -3.2520660 | -0.7130000 | -1.1582390 |
| H | -1.0785860 | 0.3248510  | -0.5912160 |
| H | 0.7476190  | -1.1200000 | -1.4984730 |
| H | -4.8846050 | -0.6746830 | 0.8757300  |
| H | -3.4657250 | -1.1239230 | 1.8530000  |
| H | -4.8369010 | -4.2797930 | 0.8563580  |
| H | -5.7817170 | -2.8736200 | 1.4235410  |
| H | -4.2767290 | -3.3366670 | 2.2661850  |
| H | -2.3273800 | -2.8567640 | -1.1368080 |
| H | -1.3671890 | -1.7952440 | -2.1978760 |
| H | -0.6800860 | -3.3170910 | -1.6016820 |
| H | -0.3785840 | -3.6127400 | 0.9653830  |
| H | -0.5230870 | -2.2037440 | 2.0411740  |
| H | -1.9589200 | -2.9068830 | 1.2825930  |
| H | 2.5000440  | 2.6732450  | -0.4102860 |
| H | 1.3836160  | -1.2388060 | 2.0758920  |
| H | 2.4981240  | 0.6323130  | 3.2759880  |
| H | -0.3985750 | 2.5814400  | 3.2722630  |
| H | -2.0224180 | 1.8628000  | 3.4057020  |
| H | -0.5977030 | 0.8501230  | 3.6972930  |
| O | -2.4674630 | 1.4882130  | -2.2187900 |
| S | -3.4470970 | 1.9621110  | -1.2566190 |
| O | -3.3815880 | 3.3069970  | -0.7289270 |
| O | -3.4236980 | 0.9964740  | 0.0392300  |
| C | -5.0778430 | 1.6524680  | -1.8892130 |
| H | -5.2066930 | 2.2747680  | -2.7758320 |
| H | -5.1592300 | 0.5972590  | -2.1540940 |
| H | -5.7992090 | 1.9222560  | -1.1182610 |
| S | 1.8304290  | -2.8648080 | -0.2758840 |
| C | 3.1603740  | -2.3847580 | -1.4379460 |
| H | 3.8079670  | -3.2677570 | -1.4552100 |
| H | 2.7249700  | -2.2812460 | -2.4358680 |
| C | 3.9595710  | -1.1519050 | -1.0812170 |
| C | 4.5499440  | -1.0022870 | 0.1775490  |
| C | 4.1520170  | -0.1534810 | -2.0383580 |
| C | 5.3152210  | 0.1219080  | 0.4719710  |
| H | 4.3922940  | -1.7663590 | 0.9353120  |
| C | 4.9234300  | 0.9712450  | -1.7479630 |
| H | 3.6834310  | -0.2504120 | -3.0139540 |
| C | 5.5066970  | 1.1122280  | -0.4919180 |
| H | 5.7576650  | 0.2295740  | 1.4578200  |
| H | 5.0587260  | 1.7397690  | -2.5028790 |
| H | 6.0984730  | 1.9918140  | -0.2585120 |

**TS C2**

SCF energy: - 2363.31768046 hartree



Free energy correction: + 0.402781 hartree

imaginary frequency: - 558.1i cm<sup>-1</sup>

|   |            |            |            |
|---|------------|------------|------------|
| C | 0.8964290  | -0.8750120 | 0.3578970  |
| C | -0.4010730 | -1.6363000 | 0.2074390  |
| C | -1.2124020 | -1.2150080 | -1.0269890 |
| C | -1.5108640 | 0.3245150  | -0.9664330 |
| C | 1.4709760  | -0.6137980 | 1.7223610  |
| O | 2.5388840  | 0.2752110  | 1.5487040  |
| C | 3.0787500  | 0.7327770  | 2.7706370  |
| C | -2.5107490 | -2.0272760 | -1.0941270 |
| C | -0.3885420 | -1.5088690 | -2.2902900 |
| N | -5.0677520 | 1.1507470  | -1.1210800 |
| C | -3.7977410 | 0.8560510  | -1.5576410 |
| N | -2.8633660 | 0.6797970  | -0.5360610 |
| C | -3.2327760 | 0.7635480  | 0.7897860  |
| C | -4.4898790 | 1.0327400  | 1.1871430  |
| C | -5.5314800 | 1.2546530  | 0.1963510  |
| O | -6.6994480 | 1.5085370  | 0.4201660  |
| O | -3.5110910 | 0.7498230  | -2.7360100 |
| O | -1.1748610 | -1.3983380 | 1.3917290  |
| C | -1.7225790 | -2.4785710 | 2.0184520  |
| C | -2.5514830 | -2.0384070 | 3.1899610  |
| O | -1.5585670 | -3.6085130 | 1.6419720  |
| H | 1.4371480  | -0.5073160 | -0.5005460 |
| H | -0.1659510 | -2.7011150 | 0.1468560  |
| H | -1.4254960 | 0.7294730  | -1.9762060 |
| H | 1.7971780  | -1.5731920 | 2.1491610  |
| H | 0.7050820  | -0.1927060 | 2.3862350  |
| H | 3.8585860  | 1.4527840  | 2.5177310  |
| H | 2.3088910  | 1.2285520  | 3.3764320  |
| H | 3.5112310  | -0.0946300 | 3.3484360  |
| H | -3.0792930 | -1.7477890 | -1.9857010 |
| H | -2.2715510 | -3.0923470 | -1.1582700 |
| H | -3.1481750 | -1.8730370 | -0.2184350 |
| H | -0.9857820 | -1.2646630 | -3.1738750 |
| H | 0.5494300  | -0.9493070 | -2.3413590 |
| H | -0.1305520 | -2.5716100 | -2.3306650 |
| H | -5.7552750 | 1.2825750  | -1.8564570 |
| H | -2.4347810 | 0.5936410  | 1.5028190  |
| H | -4.7468000 | 1.1028740  | 2.2348500  |
| H | -2.8408330 | -2.9081920 | 3.7769450  |
| H | -1.9928780 | -1.3286080 | 3.8038630  |
| H | -3.4497070 | -1.5332920 | 2.8199390  |
| O | 2.9744990  | -1.0206350 | -1.7986350 |
| S | 3.2287210  | -2.2379800 | -0.9954310 |
| O | 3.5617810  | -3.4409900 | -1.7602220 |
| O | 2.0694200  | -2.4979630 | -0.0414670 |
| C | 4.6068390  | -1.8605550 | 0.0661930  |
| H | 4.3299930  | -0.9887980 | 0.6625500  |
| H | 4.8024520  | -2.7236570 | 0.7035400  |
| H | 5.4734520  | -1.6455990 | -0.5604130 |
| S | -0.2664300 | 1.2051980  | 0.0592740  |
| C | 0.7972150  | 1.9557350  | -1.2434210 |
| H | 1.1811710  | 1.1554710  | -1.8828700 |
| H | 0.1496340  | 2.6114410  | -1.8309880 |

|   |           |           |            |
|---|-----------|-----------|------------|
| C | 1.9259080 | 2.7088510 | -0.5933270 |
| C | 3.2170940 | 2.1777120 | -0.6092880 |
| C | 1.6883510 | 3.9328880 | 0.0372110  |
| C | 4.2633010 | 2.8745610 | -0.0095230 |
| H | 3.3934360 | 1.2133270 | -1.0811050 |
| C | 2.7333620 | 4.6239330 | 0.6432990  |
| H | 0.6822830 | 4.3459340 | 0.0489160  |
| C | 4.0235180 | 4.0957270 | 0.6183300  |
| H | 5.2670970 | 2.4608340 | -0.0303390 |
| H | 2.5427440 | 5.5762020 | 1.1279570  |
| H | 4.8404770 | 4.6370140 | 1.0854800  |

**59**

SCF energy: – 2363.35474492 hartree

Free energy correction: + 0.402351 hartree

imaginary frequency: none

|   |            |            |            |
|---|------------|------------|------------|
| C | 0.5931520  | -0.7010880 | 0.4827980  |
| C | -0.4686250 | -1.7693130 | 0.2810690  |
| C | -1.2842810 | -1.4168030 | -0.9770200 |
| C | -1.5355540 | 0.1307240  | -0.9724460 |
| C | 1.2666560  | -0.6680180 | 1.8375320  |
| O | 2.1048950  | 0.4585200  | 1.8140780  |
| C | 2.7935170  | 0.6768540  | 3.0282660  |
| C | -2.6016080 | -2.1889390 | -1.0565890 |
| C | -0.4309360 | -1.7460810 | -2.2135730 |
| N | -4.8095380 | 1.7101320  | -1.2378860 |
| C | -3.5616000 | 1.2866490  | -1.6231030 |
| N | -2.8515360 | 0.6104800  | -0.6196420 |
| C | -3.3862270 | 0.4368540  | 0.6461010  |
| C | -4.6089480 | 0.8724810  | 0.9889260  |
| C | -5.4343480 | 1.5650260  | 0.0081840  |
| O | -6.5531940 | 2.0008620  | 0.1894470  |
| O | -3.1092830 | 1.4742690  | -2.7346500 |
| O | -1.3026600 | -1.7770660 | 1.4471710  |
| C | -1.7463690 | -2.9870270 | 1.8929740  |
| C | -2.6475340 | -2.8148590 | 3.0812020  |
| O | -1.4492600 | -4.0256730 | 1.3653190  |
| H | 1.3479620  | -0.7810710 | -0.3010180 |
| H | 0.0261930  | -2.7380340 | 0.1732920  |
| H | -1.3409640 | 0.5350900  | -1.9675200 |
| H | 1.8397780  | -1.6016680 | 1.9438530  |
| H | 0.5345880  | -0.5996200 | 2.6539510  |
| H | 3.3943730  | 1.5766910  | 2.8872200  |
| H | 2.0903210  | 0.8275060  | 3.8573220  |
| H | 3.4499460  | -0.1707230 | 3.2640430  |
| H | -3.1514100 | -1.8986530 | -1.9571820 |
| H | -2.3865760 | -3.2590740 | -1.1126000 |
| H | -3.2487920 | -2.0150880 | -0.1925090 |
| H | -0.9853440 | -1.4850500 | -3.1200410 |
| H | 0.5325450  | -1.2262640 | -2.2251640 |
| H | -0.2167780 | -2.8181260 | -2.2360700 |
| H | -5.3401850 | 2.1923420  | -1.9569620 |
| H | -2.7413620 | -0.0849720 | 1.3451980  |
| H | -5.0015220 | 0.7252880  | 1.9852630  |

|   |            |            |            |
|---|------------|------------|------------|
| H | -2.8393310 | -3.7865850 | 3.5327130  |
| H | -2.1953660 | -2.1360140 | 3.8068680  |
| H | -3.5948500 | -2.3768510 | 2.7499160  |
| O | 2.7822920  | -0.7093510 | -1.8625980 |
| S | 3.4414420  | -1.9040410 | -1.2512110 |
| O | 4.2763000  | -2.6586270 | -2.2000240 |
| O | 2.4701080  | -2.7356890 | -0.4969920 |
| C | 4.5446160  | -1.2244660 | -0.0174790 |
| H | 3.9525270  | -0.6107520 | 0.6672820  |
| H | 5.0257830  | -2.0451950 | 0.5165200  |
| H | 5.2956140  | -0.6092400 | -0.5168710 |
| S | -0.2647130 | 0.8969100  | 0.1587130  |
| C | 0.8263530  | 1.7796170  | -1.0526630 |
| H | 1.2583830  | 1.0107470  | -1.7003680 |
| H | 0.1222950  | 2.4072330  | -1.6072270 |
| C | 1.8796700  | 2.5826820  | -0.3464560 |
| C | 3.2122040  | 2.1744440  | -0.4187530 |
| C | 1.5373010  | 3.7248250  | 0.3808140  |
| C | 4.1980360  | 2.9102240  | 0.2338890  |
| H | 3.4588100  | 1.2790930  | -0.9839950 |
| C | 2.5234000  | 4.4536350  | 1.0381280  |
| H | 0.4992640  | 4.0457220  | 0.4321960  |
| C | 3.8554680  | 4.0463510  | 0.9650800  |
| H | 5.2347590  | 2.5932120  | 0.1732180  |
| H | 2.2544830  | 5.3415800  | 1.6011650  |
| H | 4.6250630  | 4.6176800  | 1.4748690  |

**60**

SCF energy: – 1428.95319126 hartree

Free energy correction: + 0.259313 hartree

imaginary frequency: none

|   |            |            |            |
|---|------------|------------|------------|
| C | 1.9911180  | -1.1300630 | -0.7107660 |
| C | 1.4493160  | -0.6311650 | 0.6298900  |
| C | 0.2035460  | -1.4524750 | 0.9881760  |
| C | -0.6467460 | -1.5471970 | -0.3138560 |
| C | 2.8353750  | -0.0906620 | -1.4324500 |
| O | 3.8618650  | 0.2836140  | -0.5459650 |
| C | 4.6774030  | 1.3022290  | -1.0816300 |
| C | -0.5678450 | -0.8215210 | 2.1484340  |
| C | 0.6322520  | -2.8751670 | 1.3749640  |
| N | -3.8433960 | 0.2296440  | -0.0618040 |
| C | -2.9274880 | -0.7940090 | 0.0334630  |
| N | -1.6633950 | -0.4892480 | -0.4697380 |
| C | -1.3999390 | 0.7475690  | -1.0109730 |
| C | -2.3130790 | 1.7366830  | -1.0785330 |
| C | -3.6565850 | 1.5182690  | -0.5755930 |
| O | -4.5737570 | 2.3198990  | -0.5743750 |
| O | -3.2054550 | -1.8734030 | 0.5257310  |
| O | 1.0829240  | 0.7421560  | 0.4609450  |
| C | 1.4768200  | 1.6317140  | 1.4000190  |
| C | 1.0634090  | 3.0204360  | 1.0006410  |
| O | 2.0647930  | 1.3250870  | 2.4061750  |
| H | 2.6012480  | -2.0189340 | -0.5307470 |
| H | 2.2132060  | -0.6962930 | 1.4073990  |
| H | -1.2189060 | -2.4738290 | -0.3019020 |
| H | 2.2176200  | 0.7788710  | -1.6993360 |

|   |            |            |            |
|---|------------|------------|------------|
| H | 3.2516590  | -0.5111070 | -2.3605250 |
| H | 5.4403950  | 1.5330820  | -0.3372540 |
| H | 5.1636230  | 0.9746250  | -2.0104430 |
| H | 4.0909430  | 2.2073240  | -1.2925800 |
| H | -1.4431810 | -1.4277390 | 2.3957970  |
| H | 0.0798210  | -0.7649060 | 3.0286460  |
| H | -0.9052770 | 0.1913940  | 1.9092910  |
| H | -0.2454120 | -3.4522260 | 1.6810710  |
| H | 1.1101470  | -3.4042730 | 0.5449150  |
| H | 1.3314650  | -2.8460760 | 2.2160520  |
| H | -4.7655030 | 0.0146710  | 0.3036800  |
| H | -0.3951900 | 0.8696690  | -1.3922240 |
| H | -2.0733140 | 2.6926210  | -1.5227290 |
| H | -0.0110570 | 3.0379850  | 0.7974930  |
| H | 1.3109270  | 3.7212440  | 1.7959130  |
| H | 1.5816520  | 3.3018350  | 0.0794390  |
| S | 0.5290220  | -1.6235850 | -1.7126220 |

<sup>1</sup>H-NMR (500 MHz, CDCl<sub>3</sub>)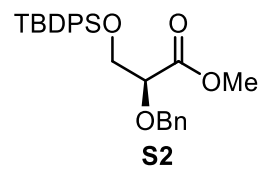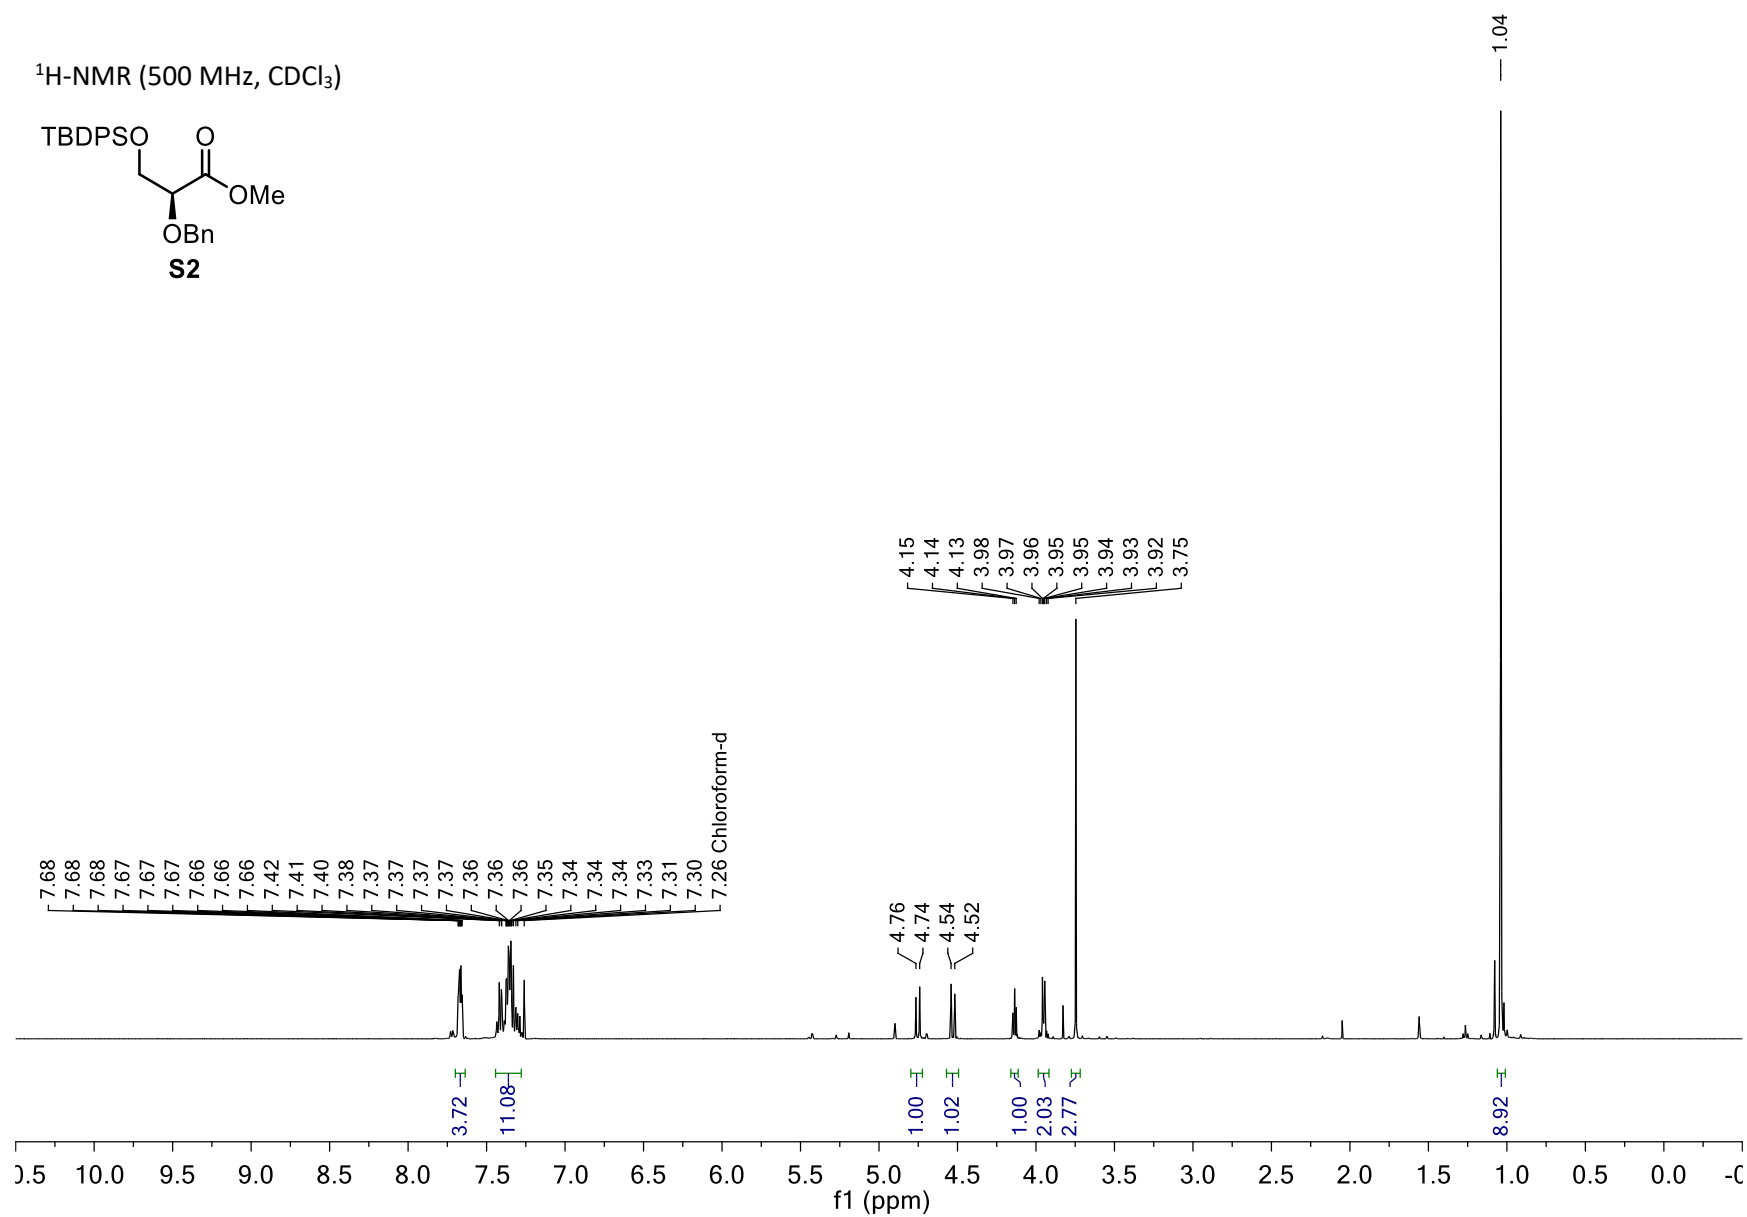

$^1\text{H}$ -NMR (500 MHz,  $\text{CDCl}_3$ )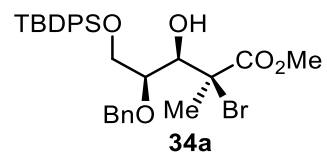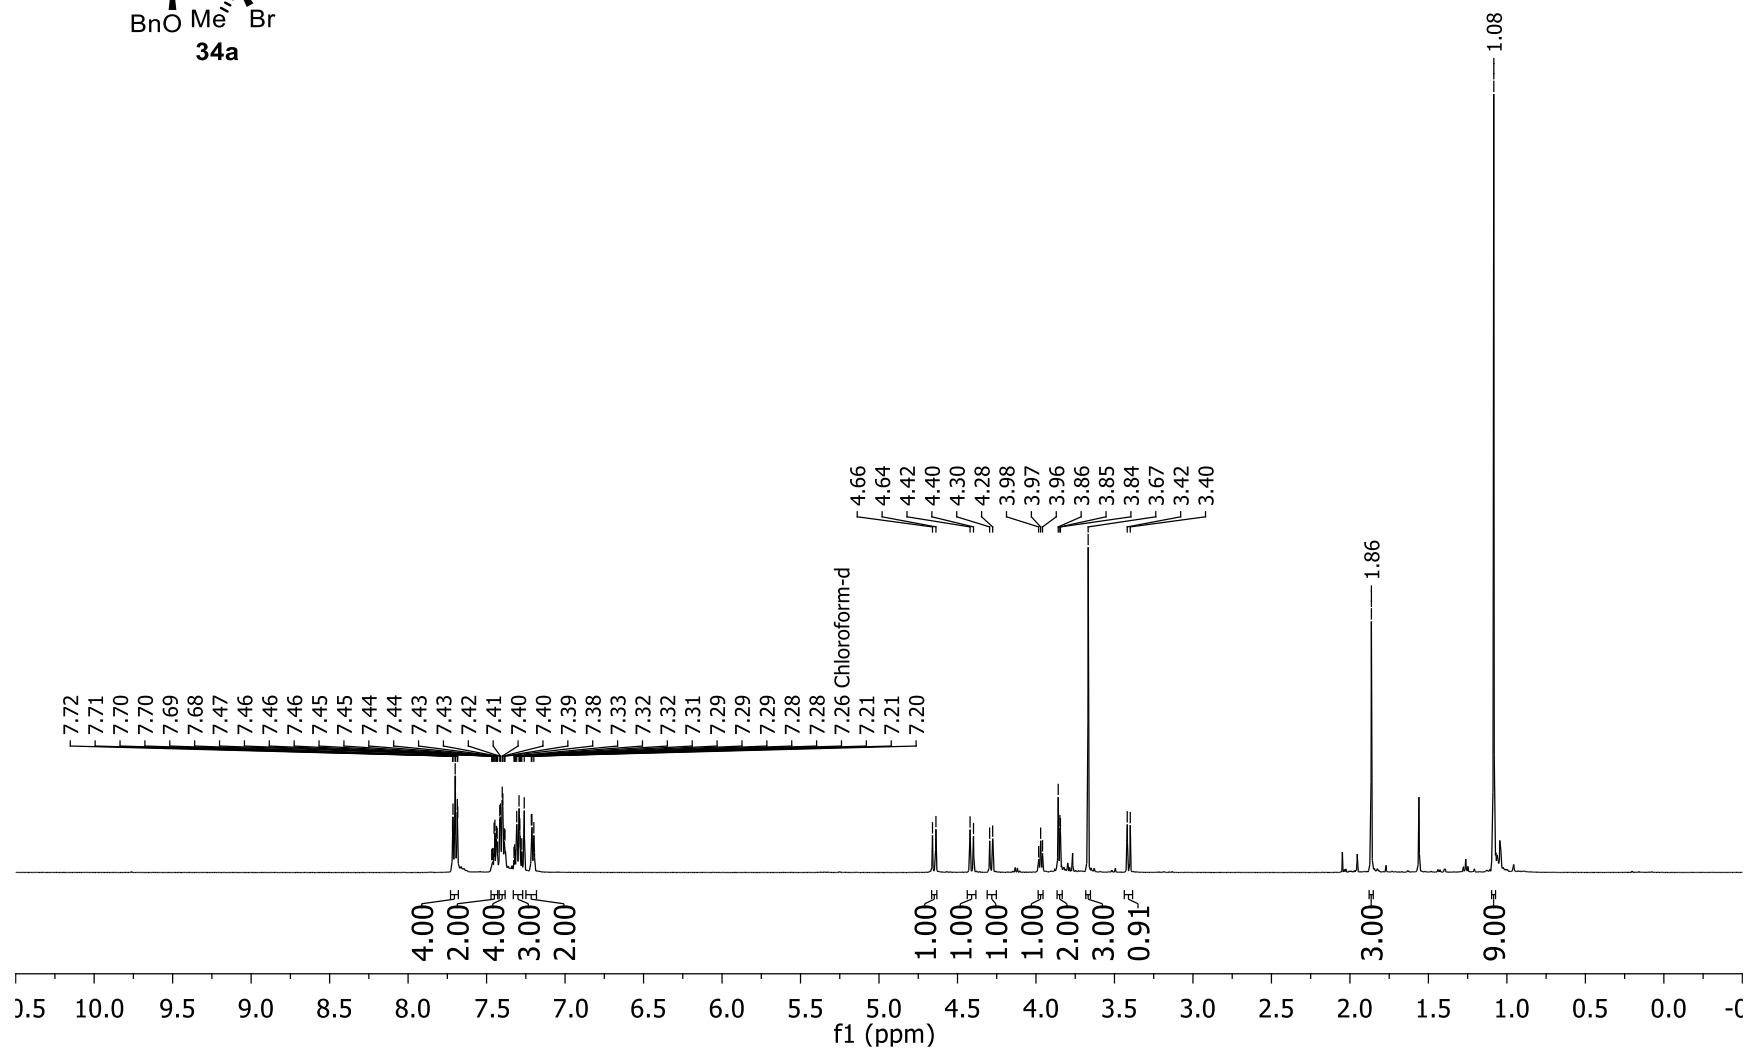

$^{13}\text{C}\{^1\text{H}\}$ -NMR (126 MHz,  $\text{CDCl}_3$ )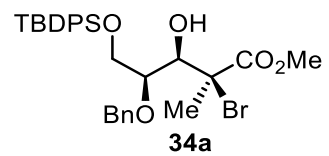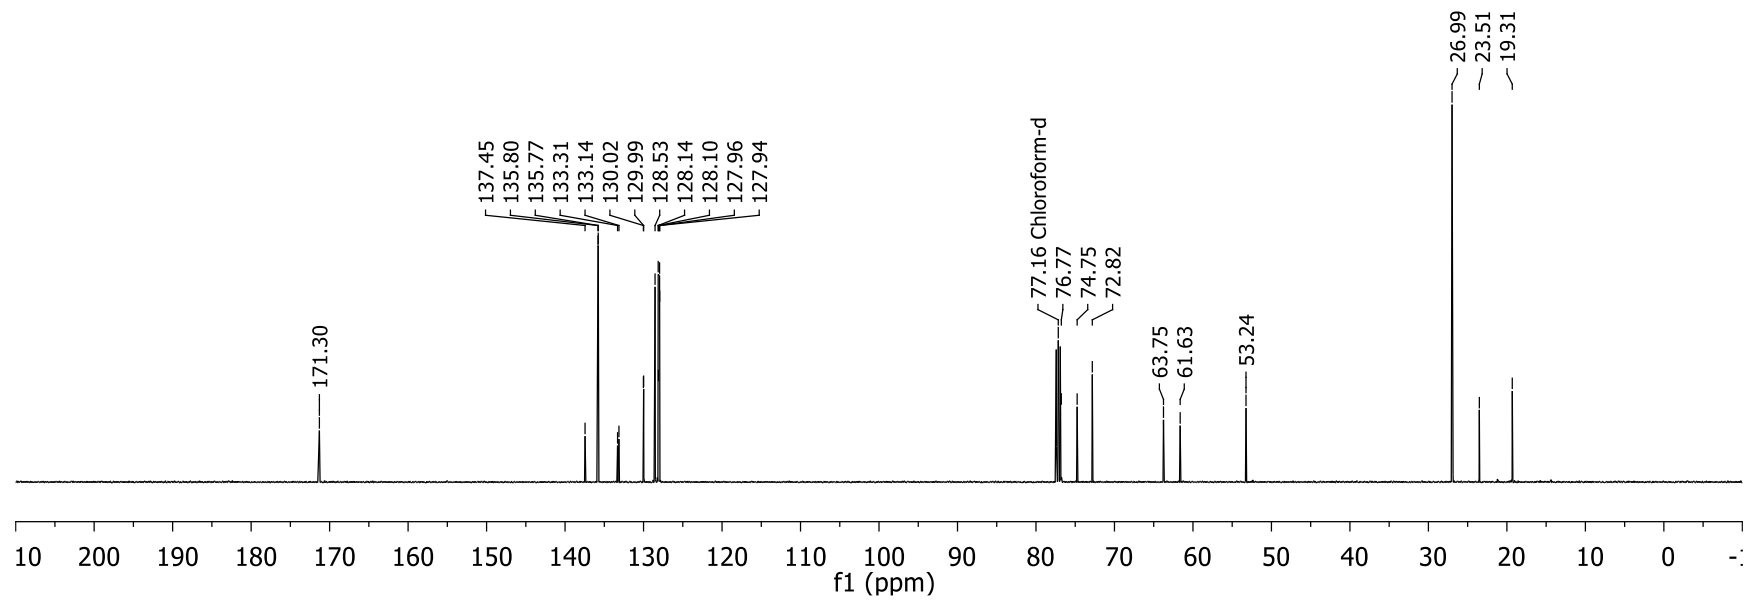

$^1\text{H}$ -NMR (500 MHz,  $\text{CDCl}_3$ )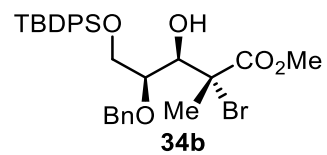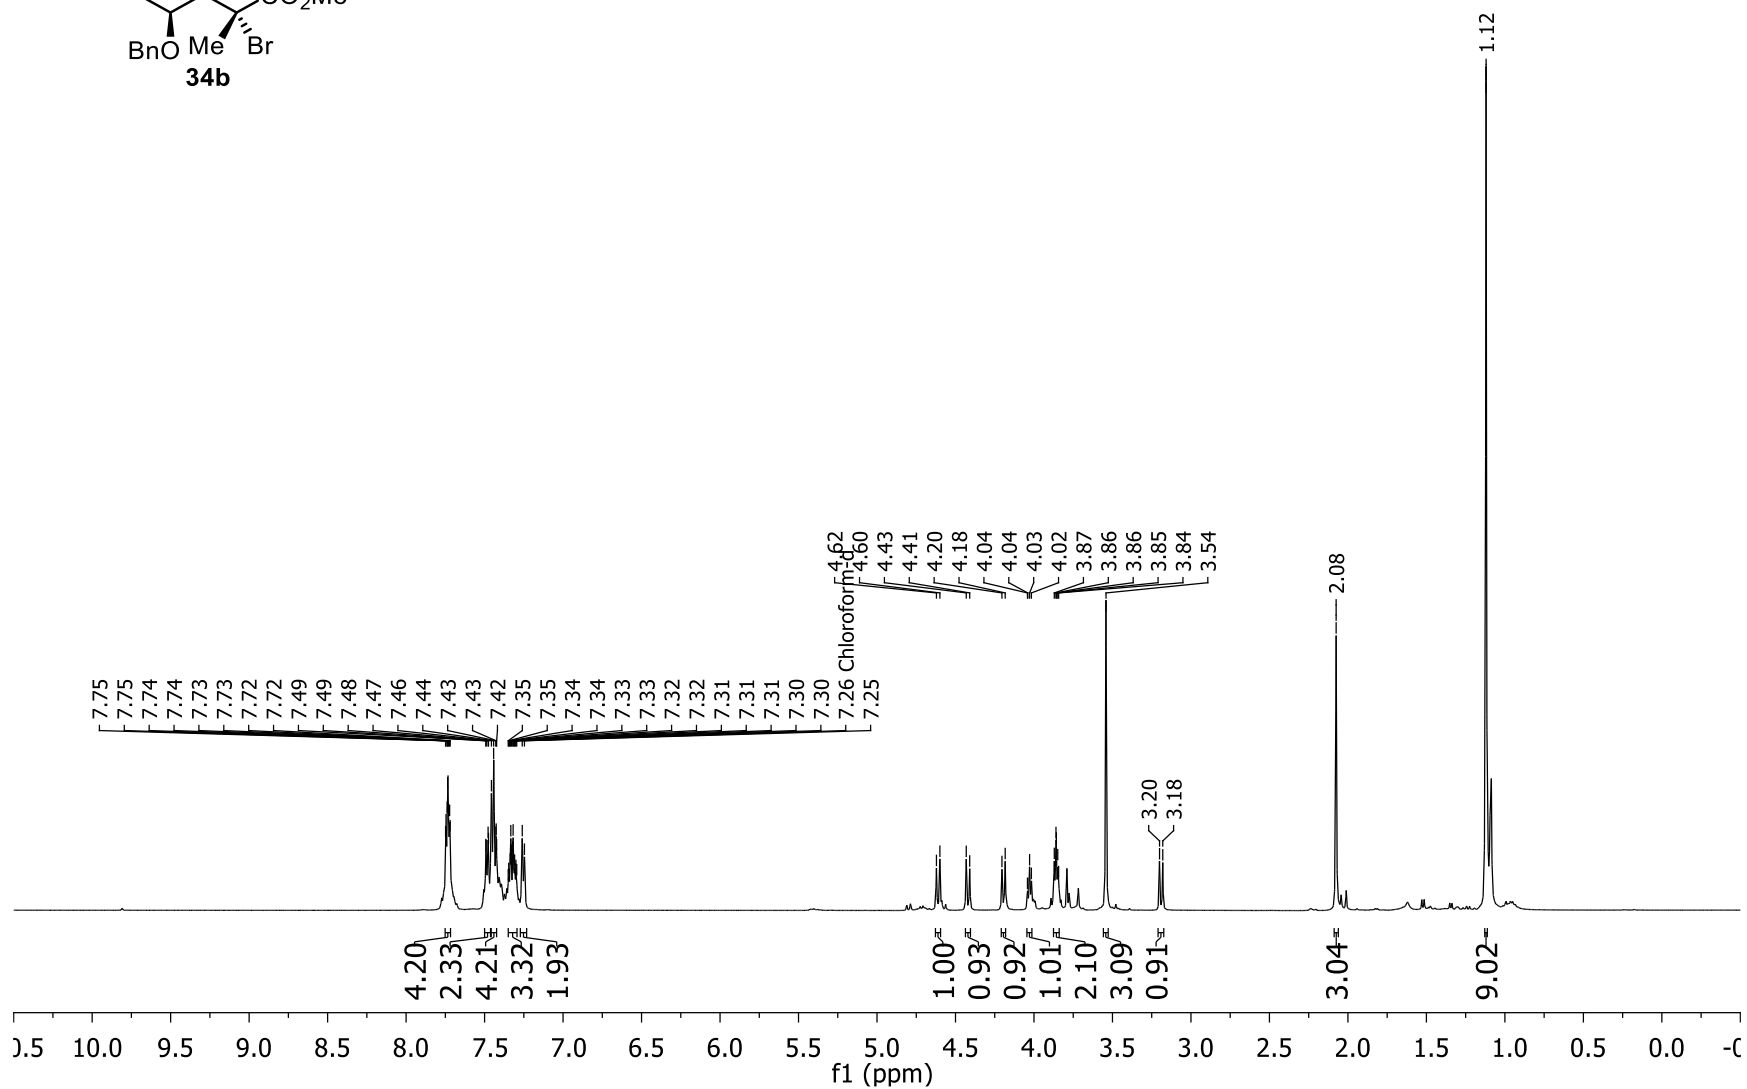



$^{13}\text{C}\{^1\text{H}\}$ -NMR (126 MHz,  $\text{CDCl}_3$ )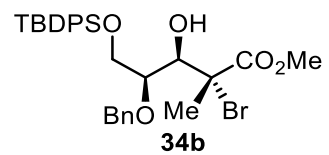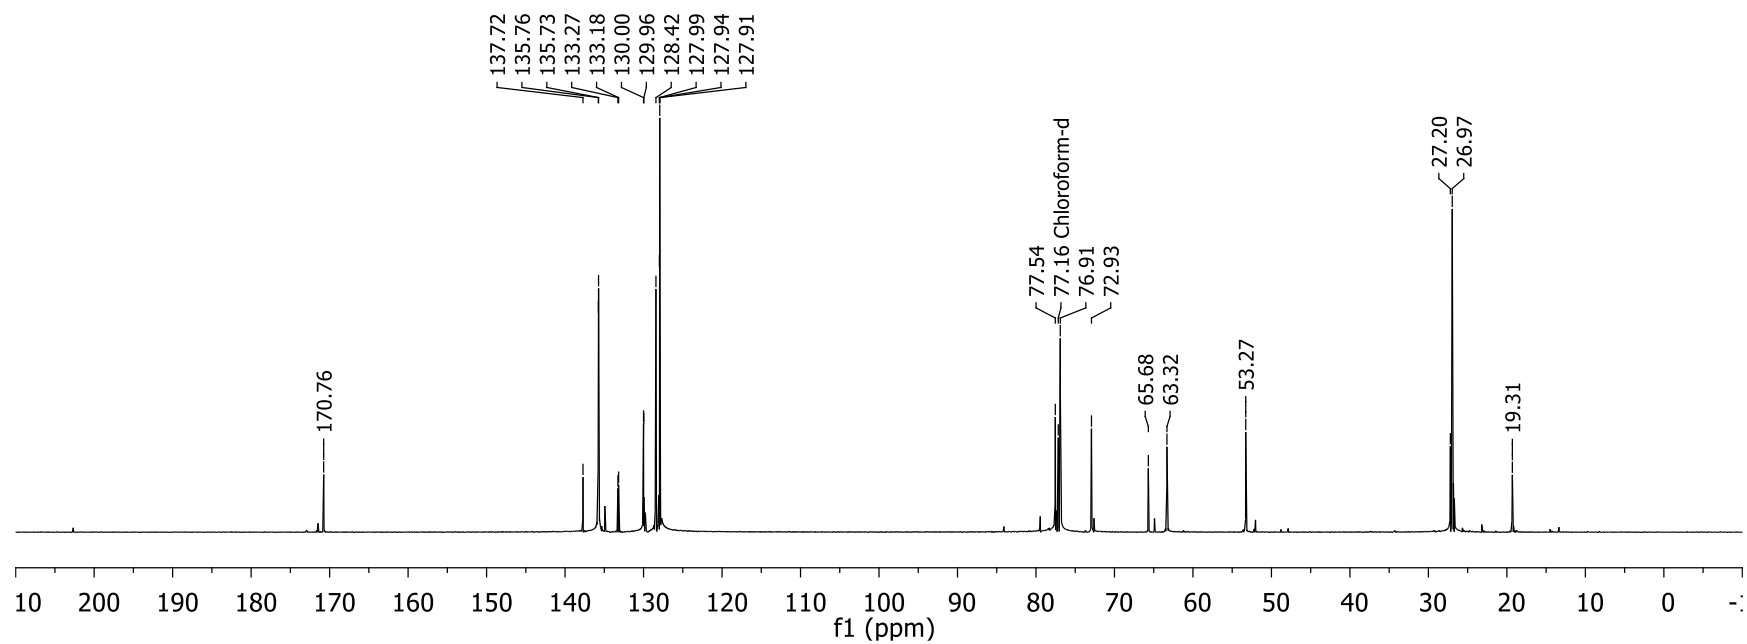

$^1\text{H}$ -NMR (500 MHz,  $\text{CDCl}_3$ )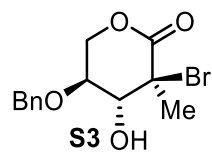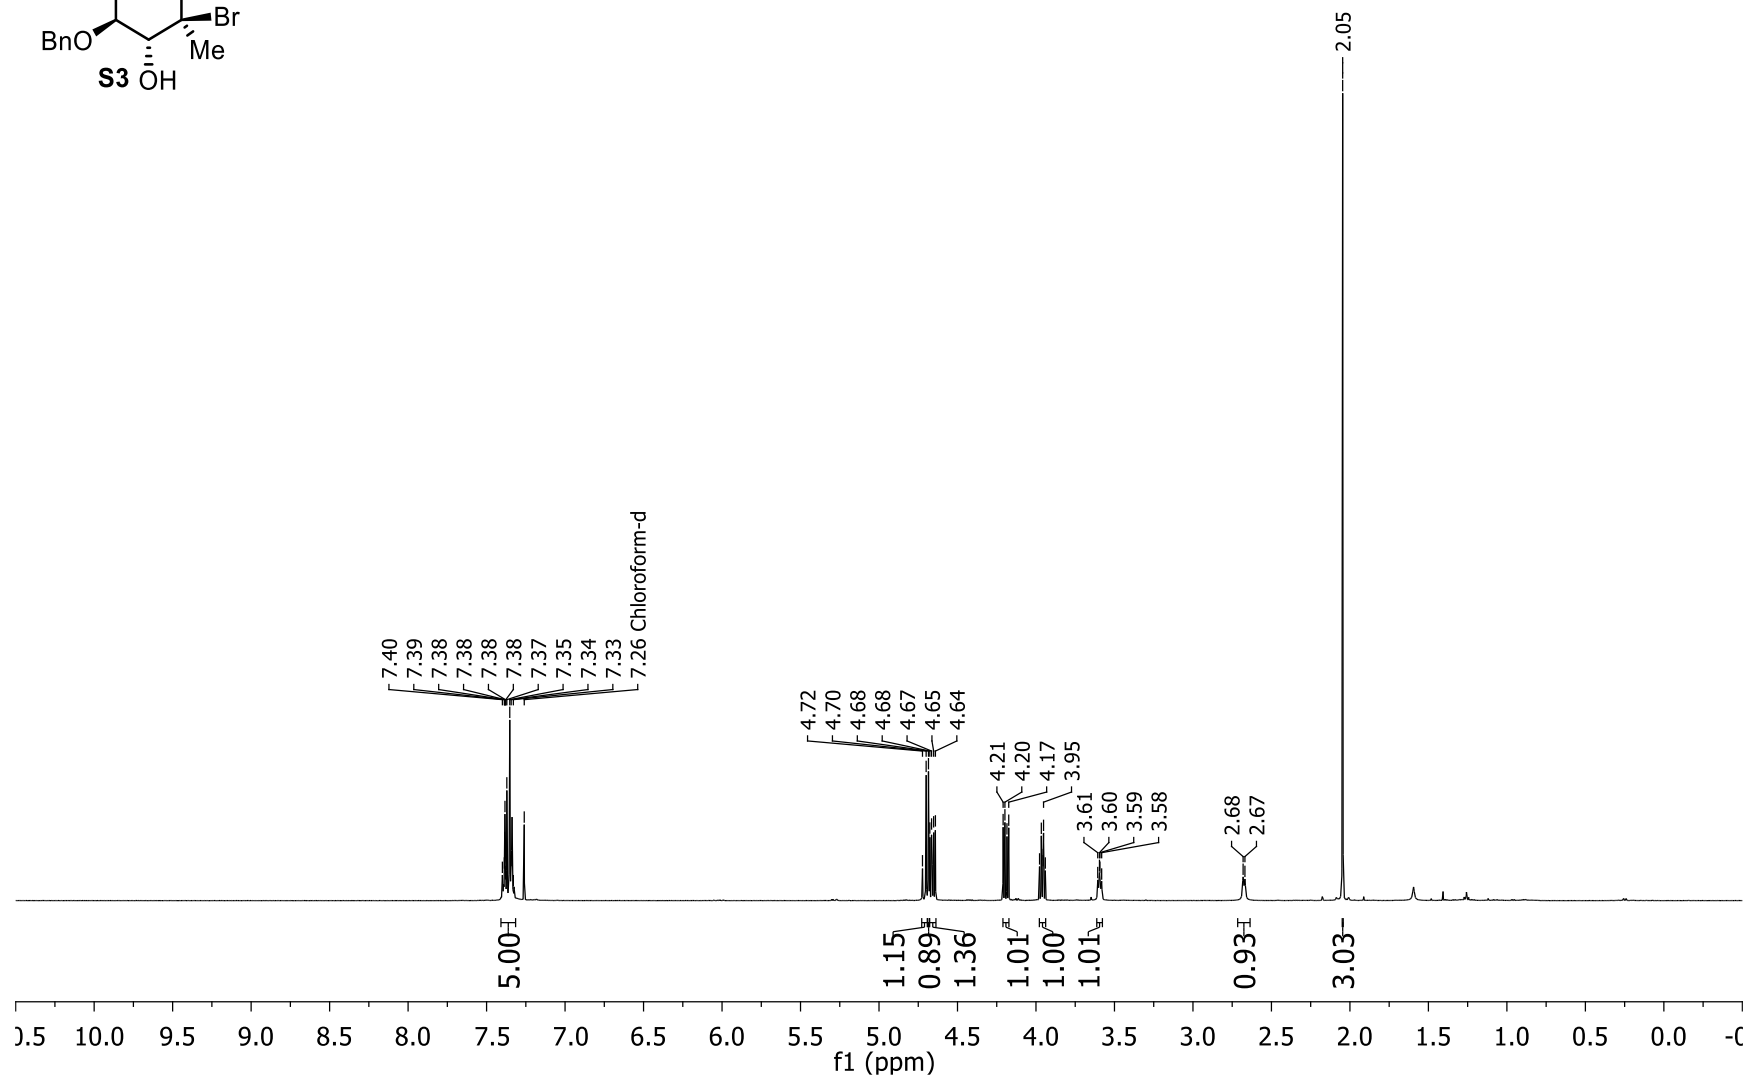

$^{13}\text{C}\{^1\text{H}\}$ -NMR (126 MHz,  $\text{CDCl}_3$ )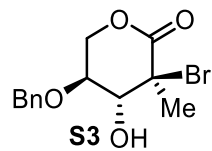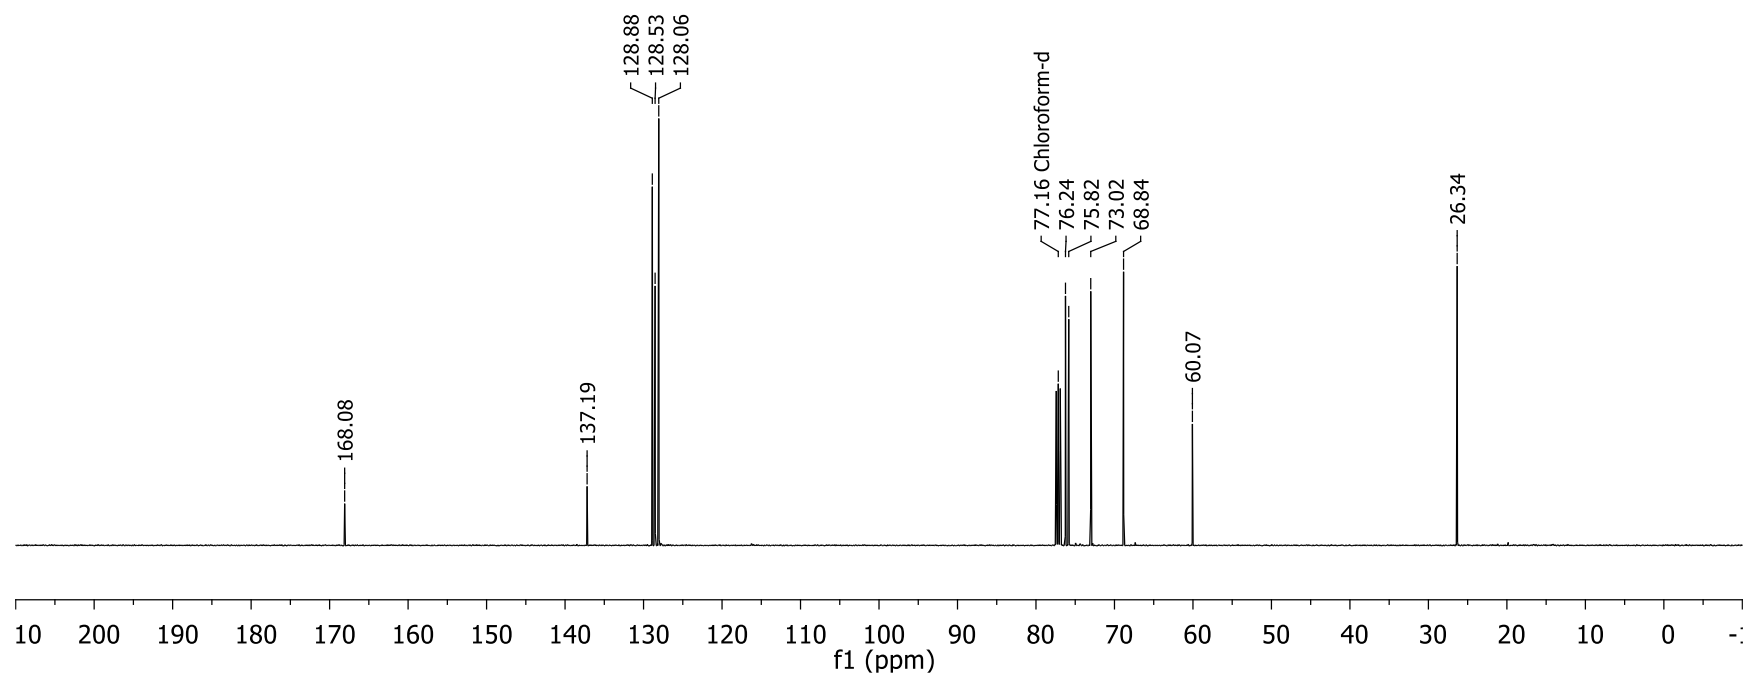

COSY (500 MHz, CDCl<sub>3</sub>)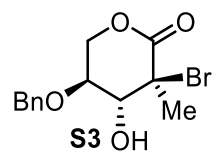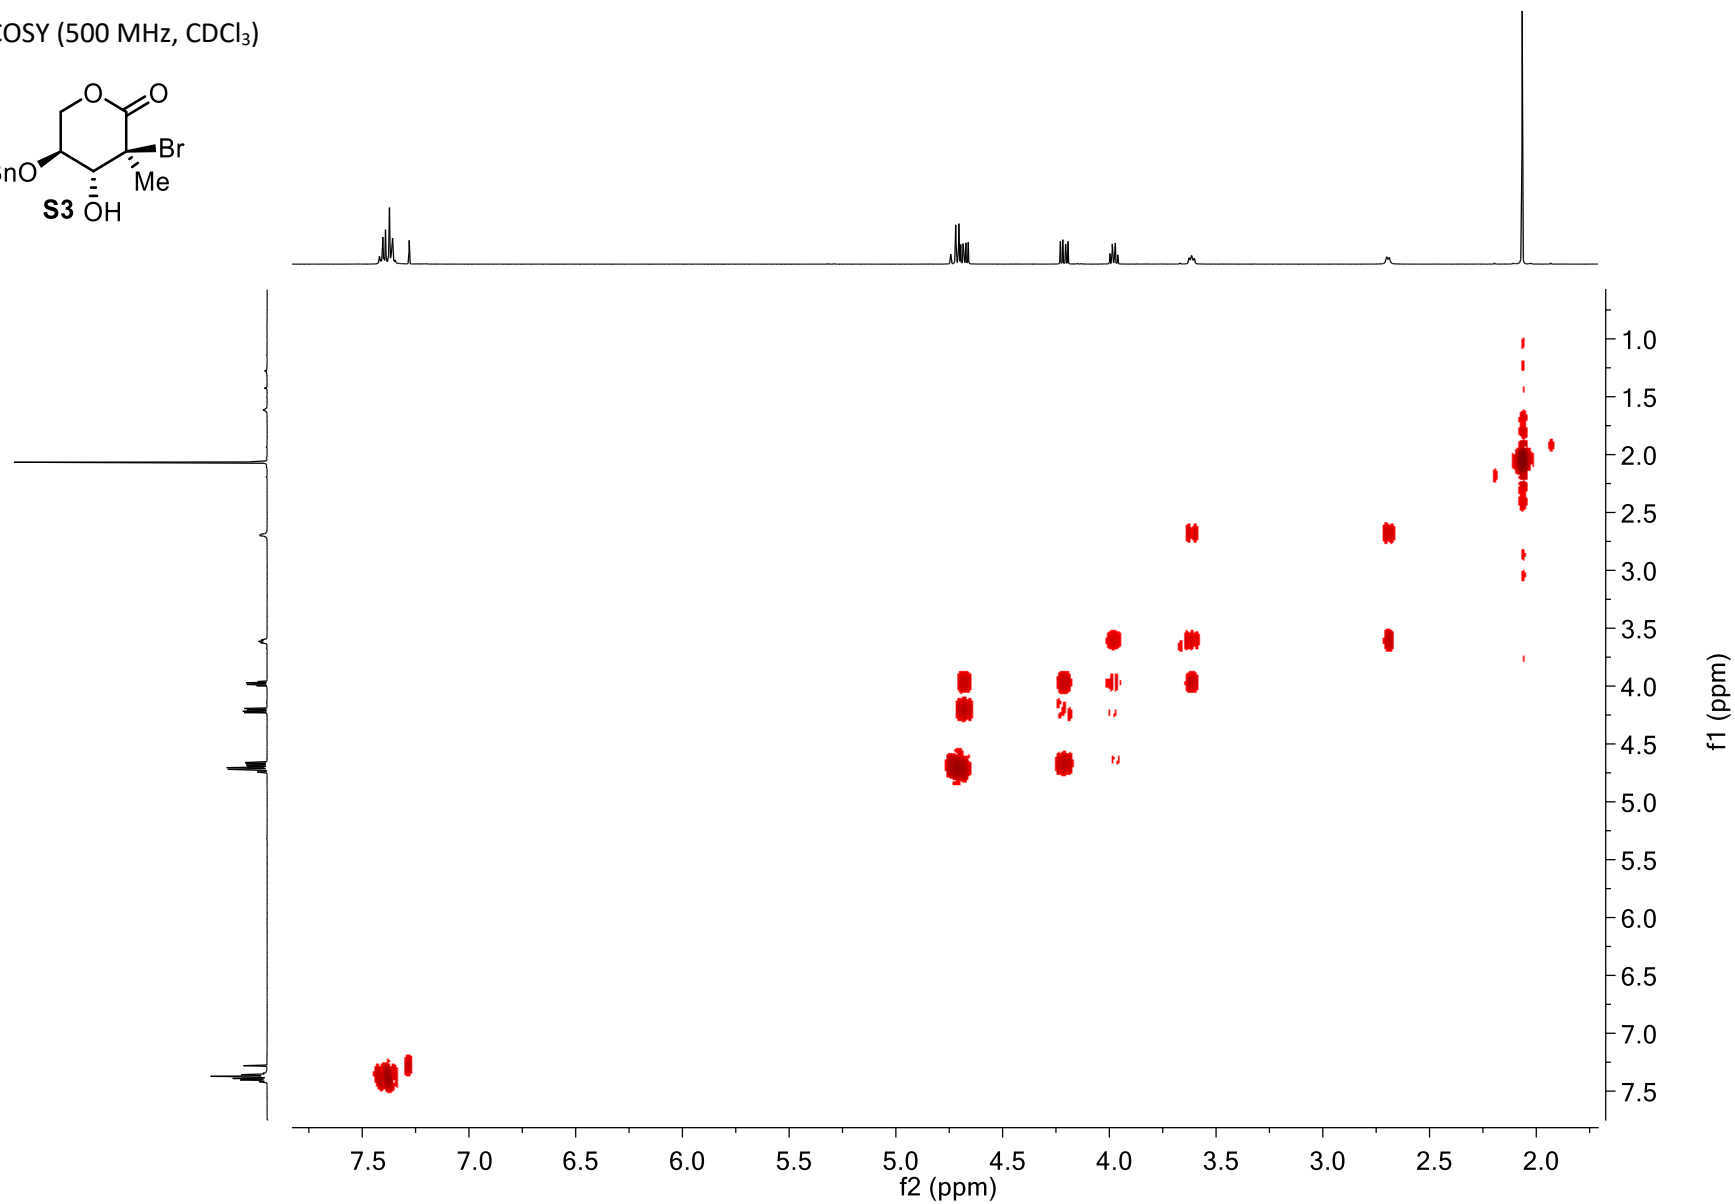

NOESY (500 MHz, CDCl<sub>3</sub>)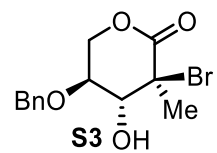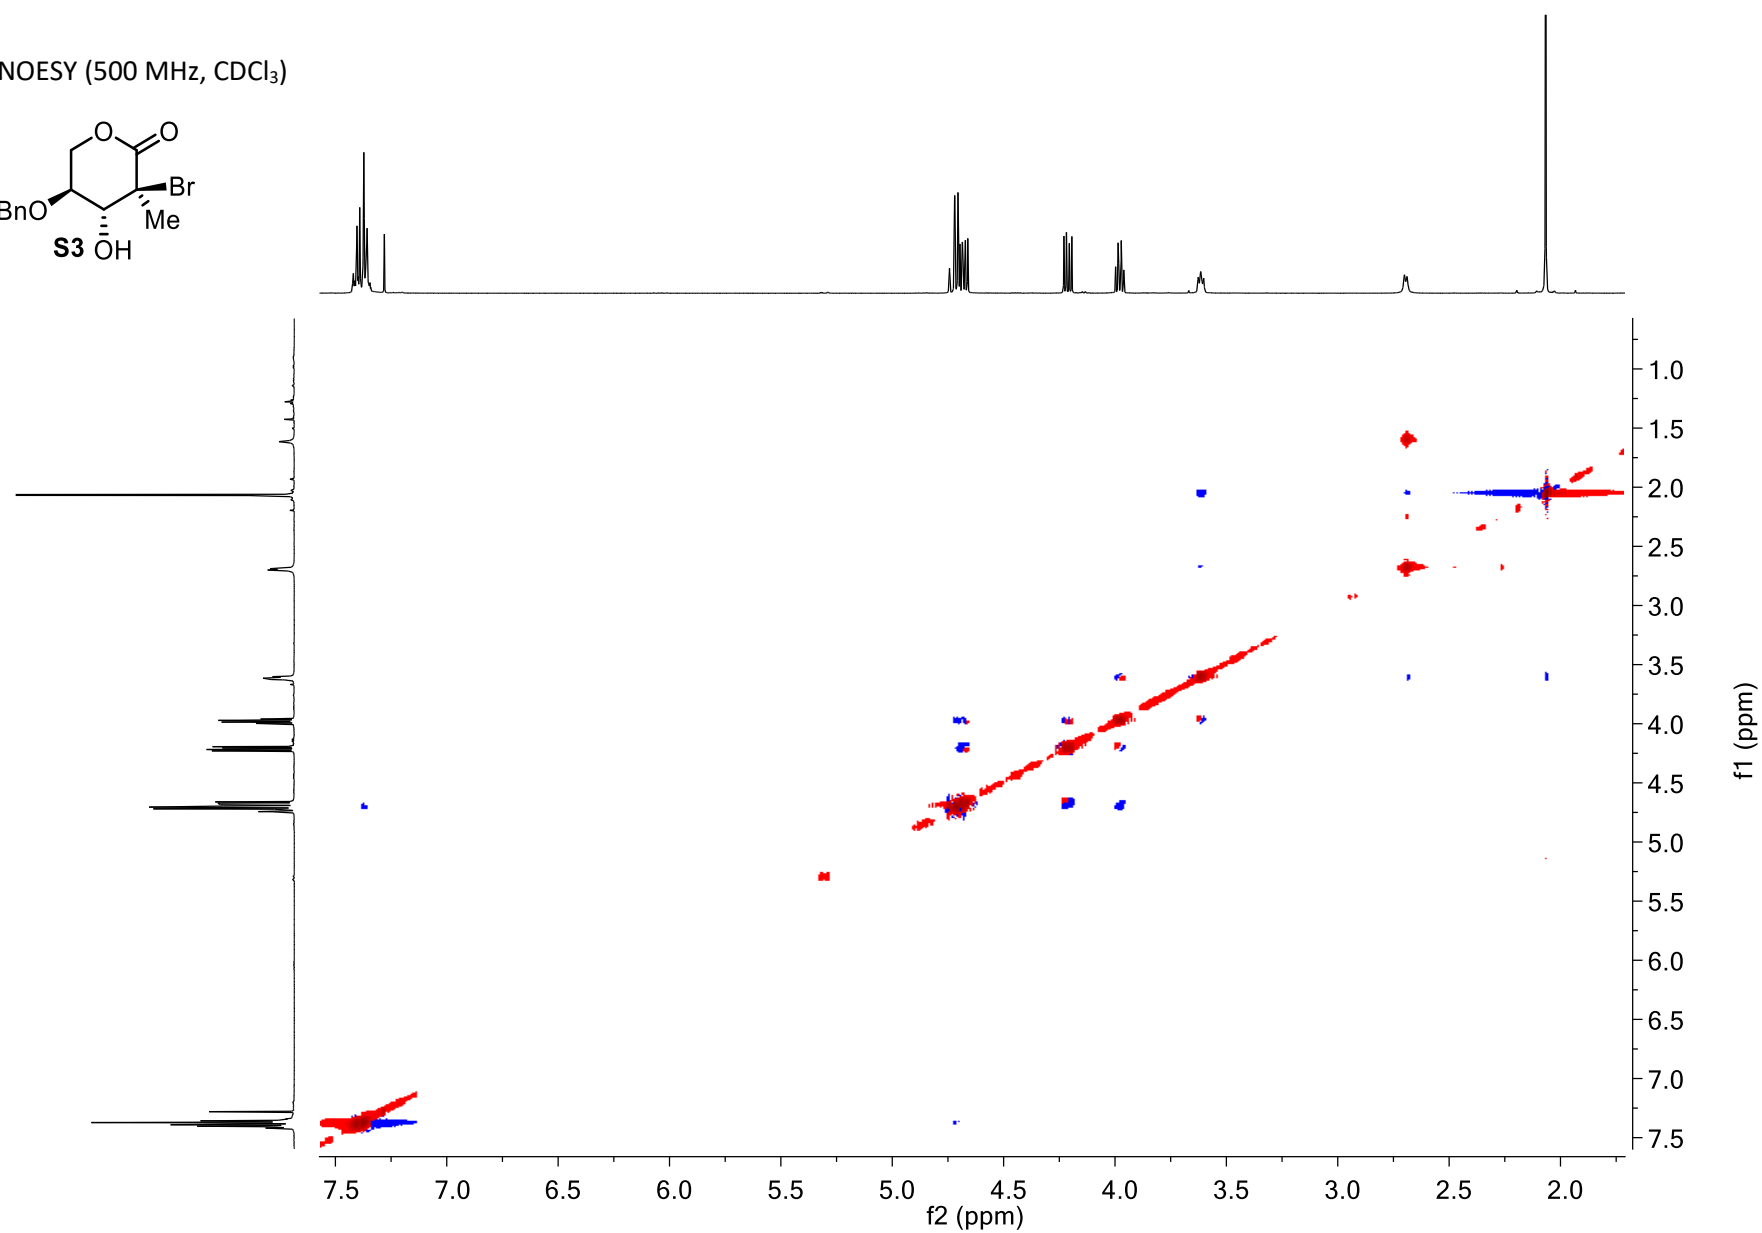

$^1\text{H}$ -NMR (500 MHz,  $\text{CDCl}_3$ )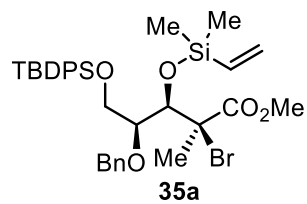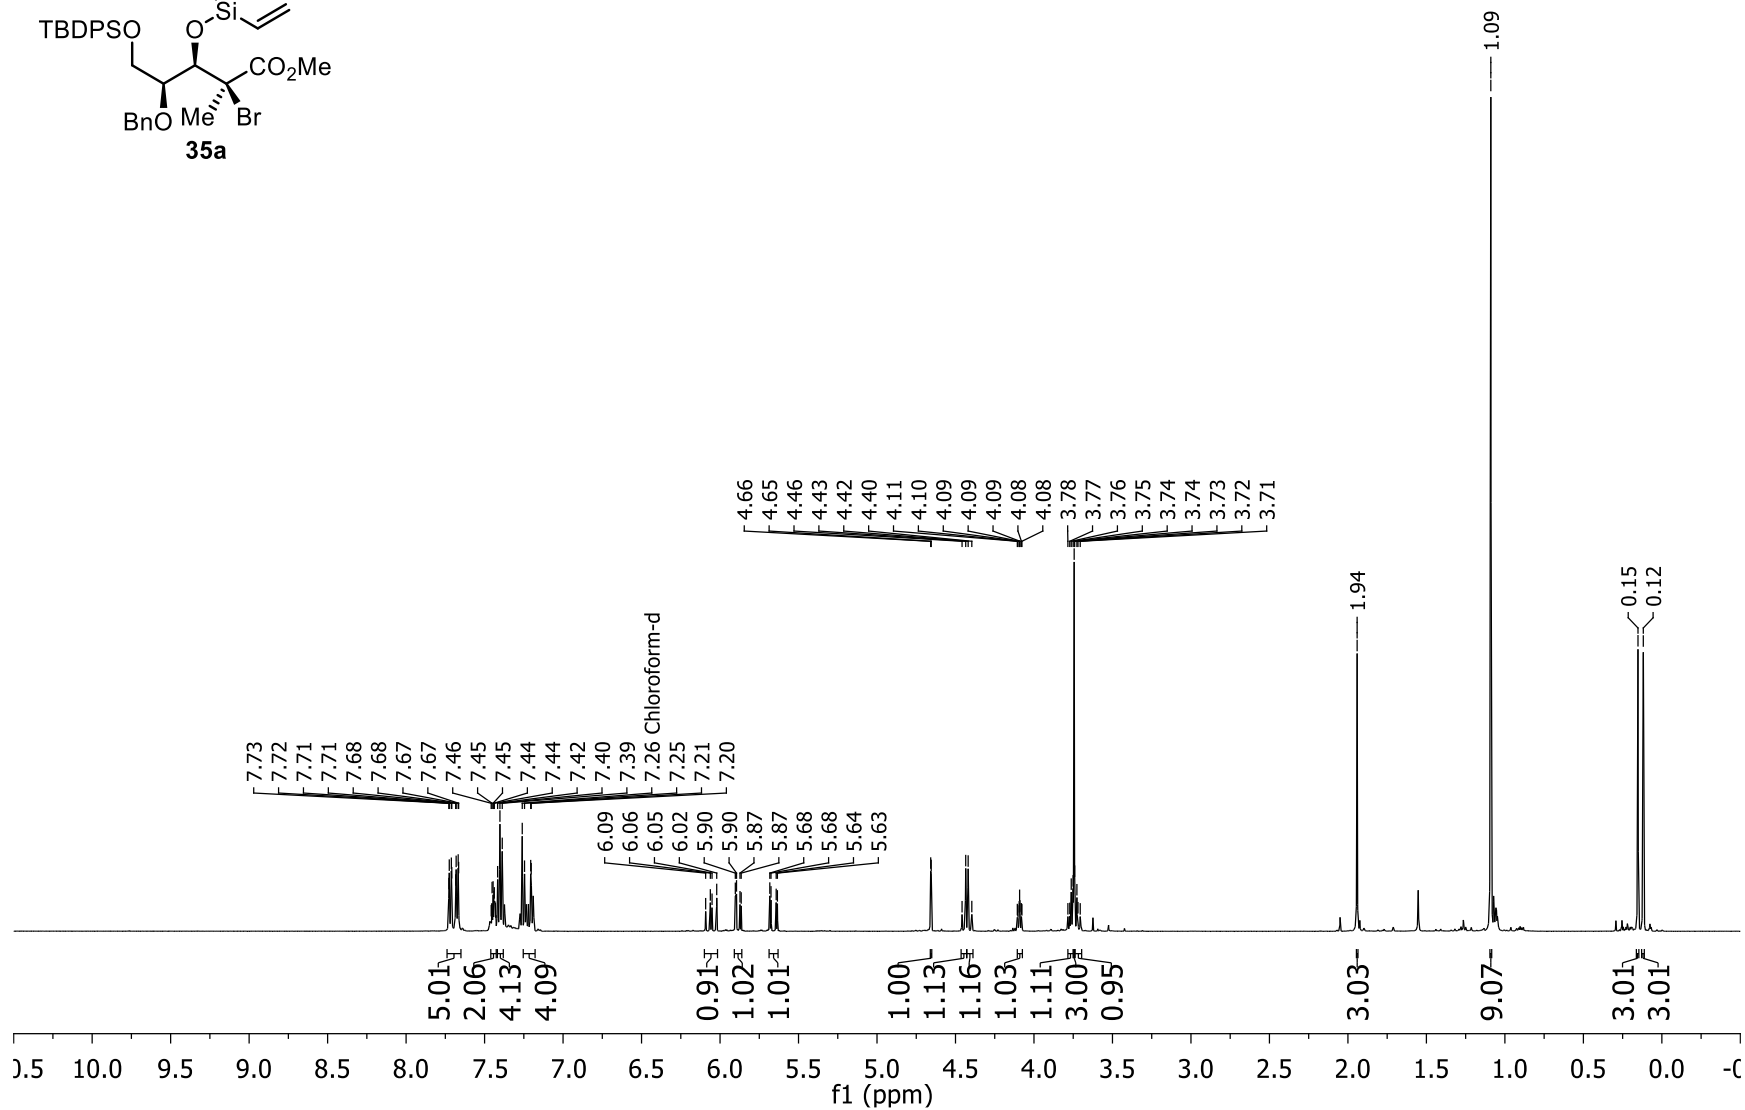

$^{13}\text{C}\{^1\text{H}\}$ -NMR (126 MHz,  $\text{CDCl}_3$ )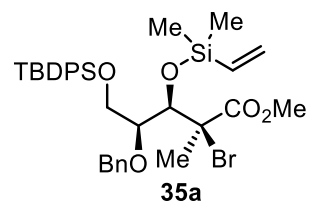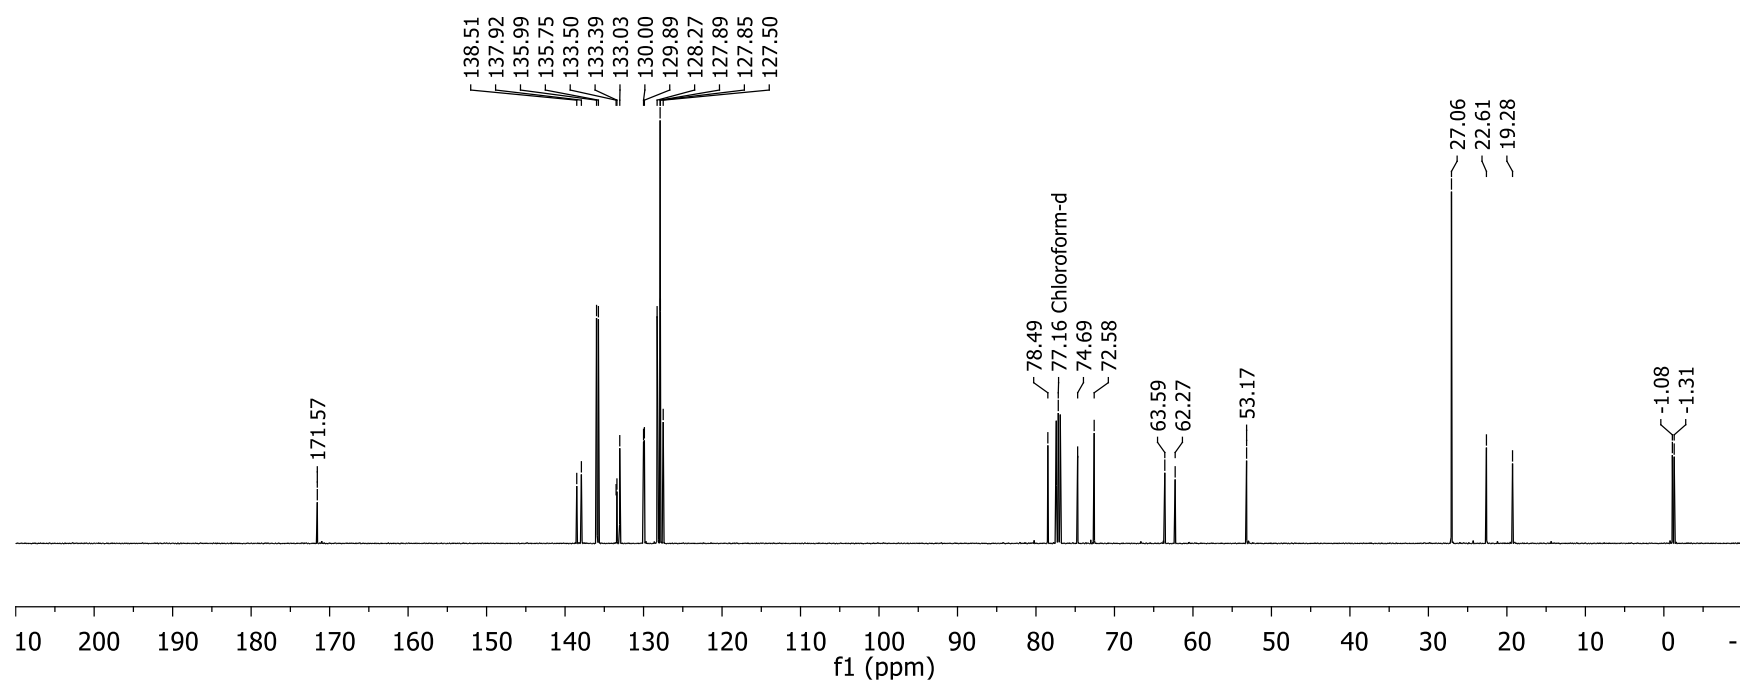

<sup>1</sup>H-NMR (500 MHz, CDCl<sub>3</sub>)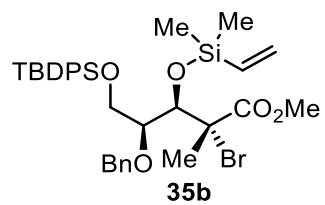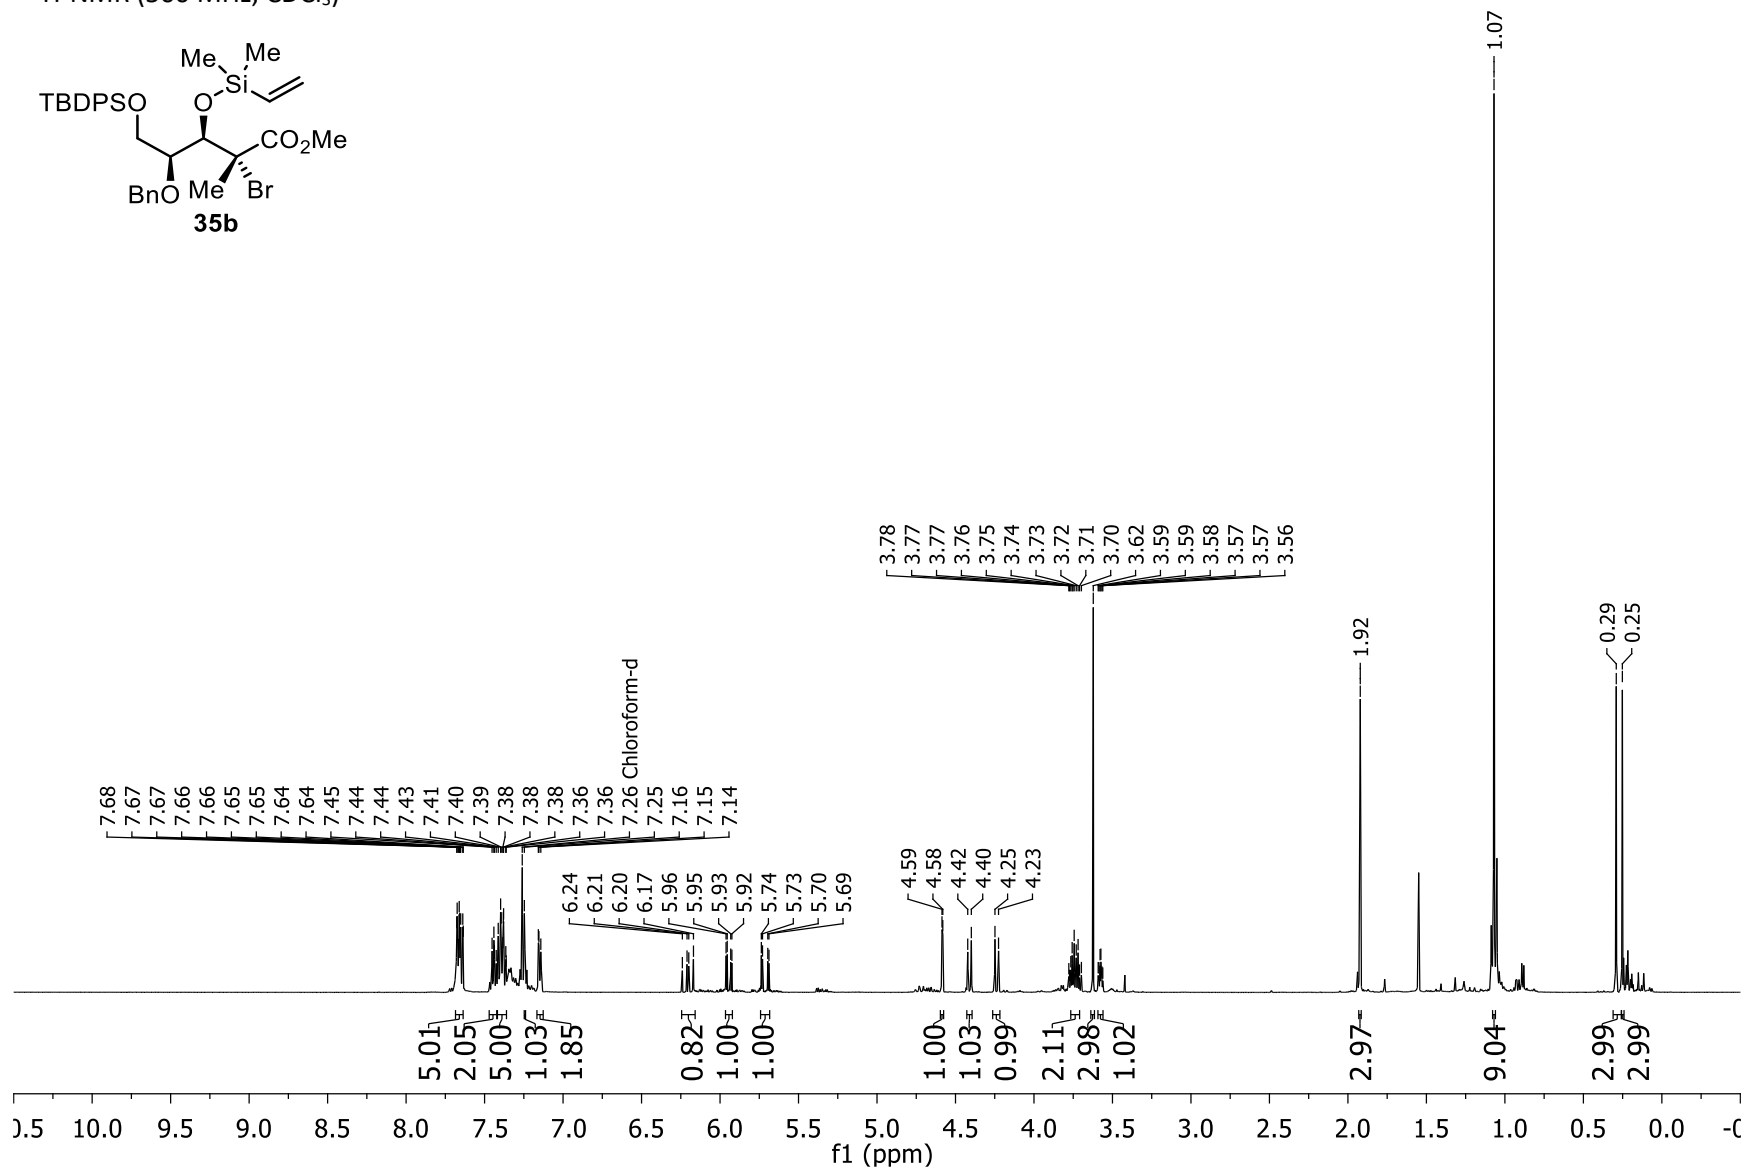



$^{13}\text{C}\{^1\text{H}\}$ -NMR (126 MHz,  $\text{CDCl}_3$ )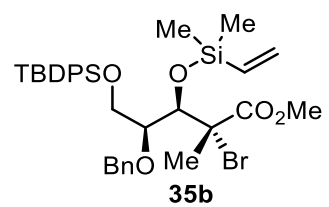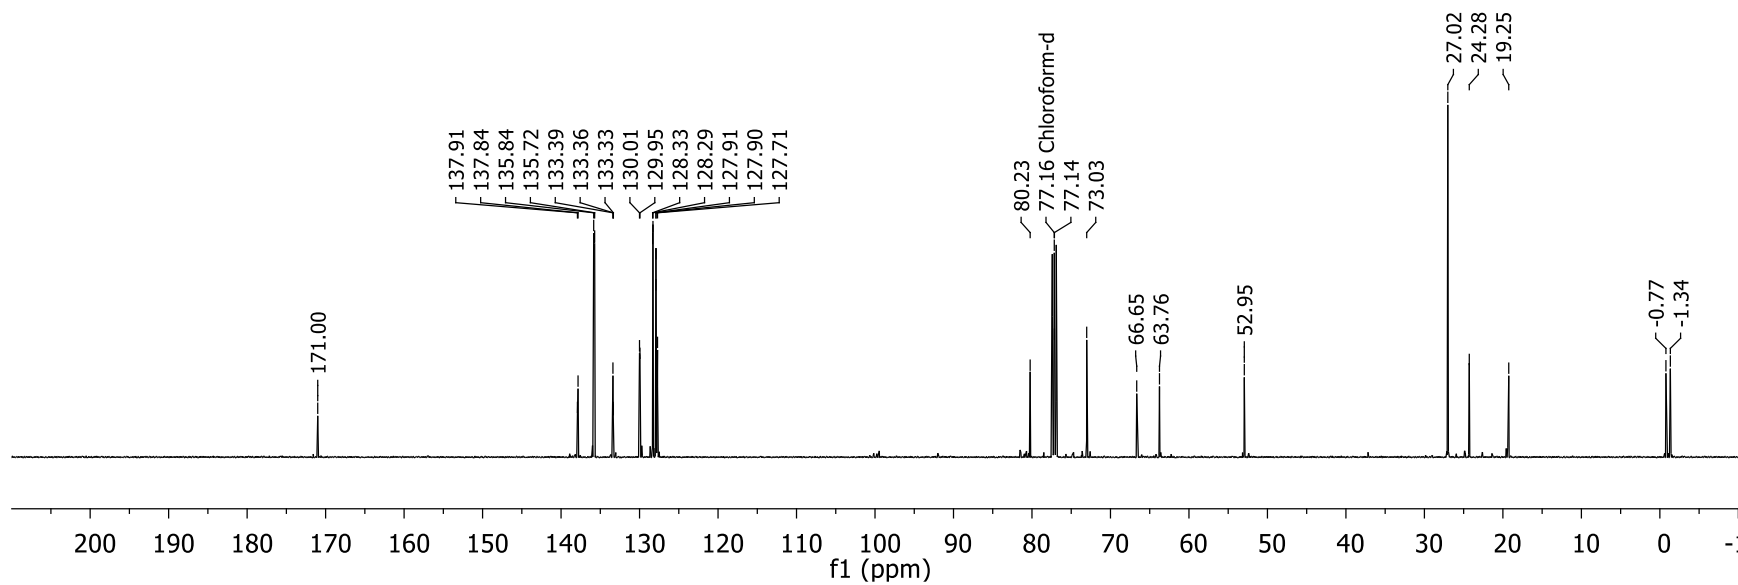

<sup>1</sup>H-NMR (500 MHz, CDCl<sub>3</sub>)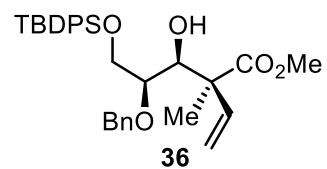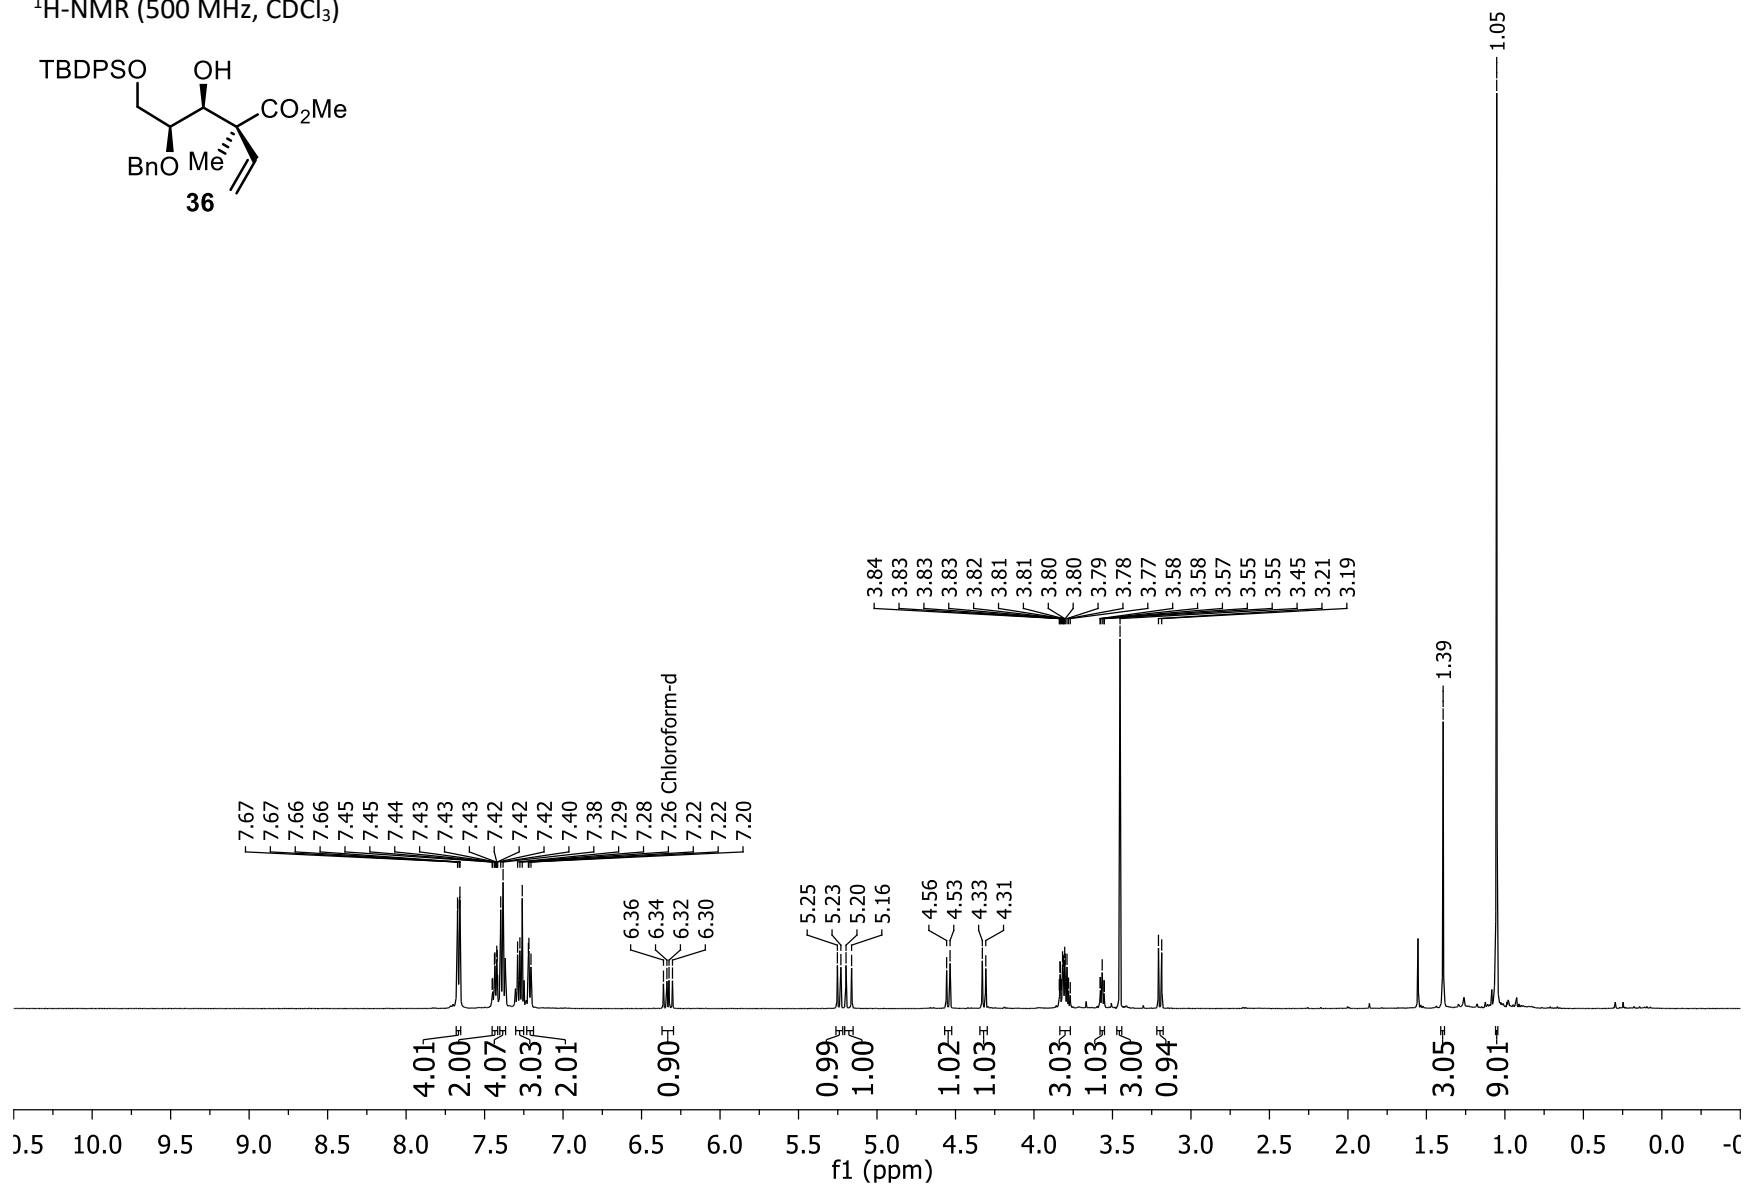

$^{13}\text{C}\{^1\text{H}\}$ -NMR (126 MHz,  $\text{CDCl}_3$ )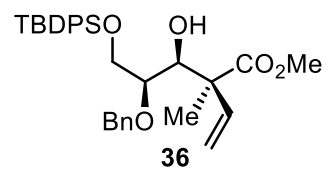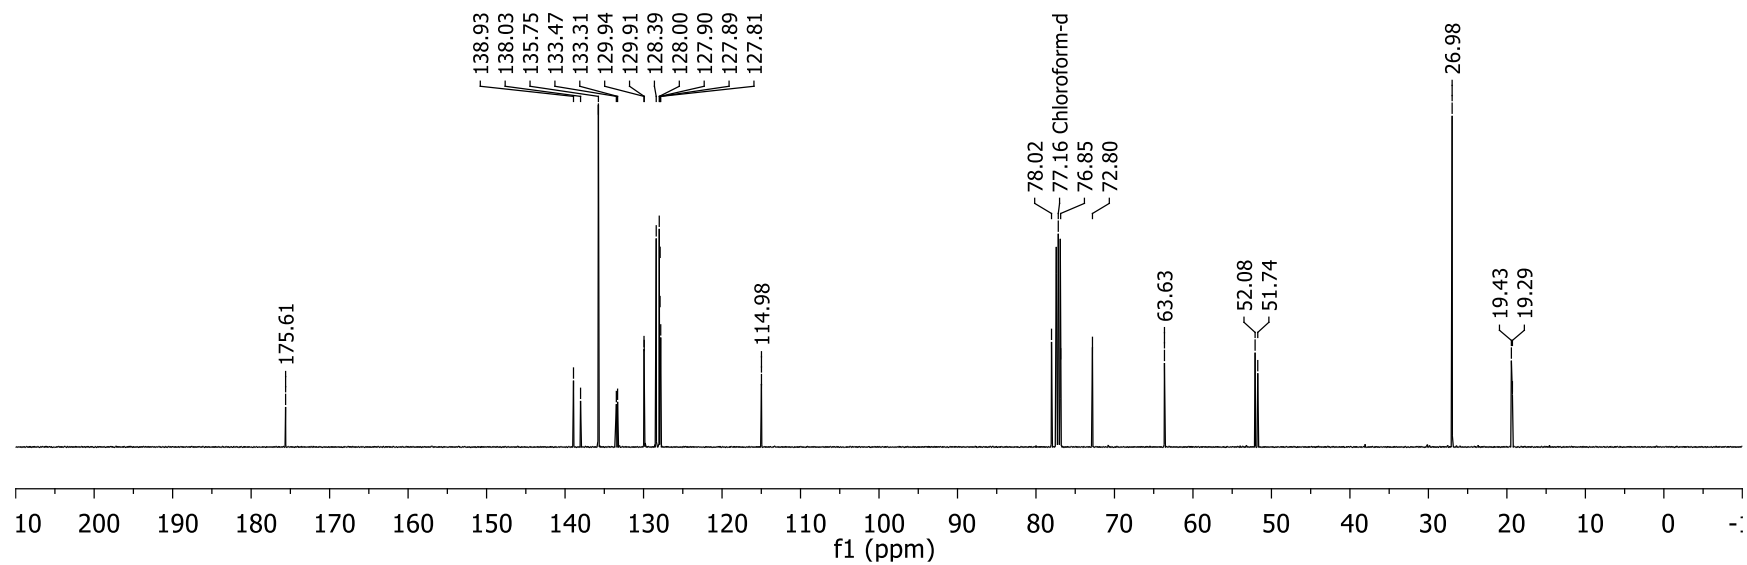

$^1\text{H}$ -NMR (500 MHz,  $\text{CDCl}_3$ )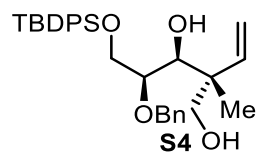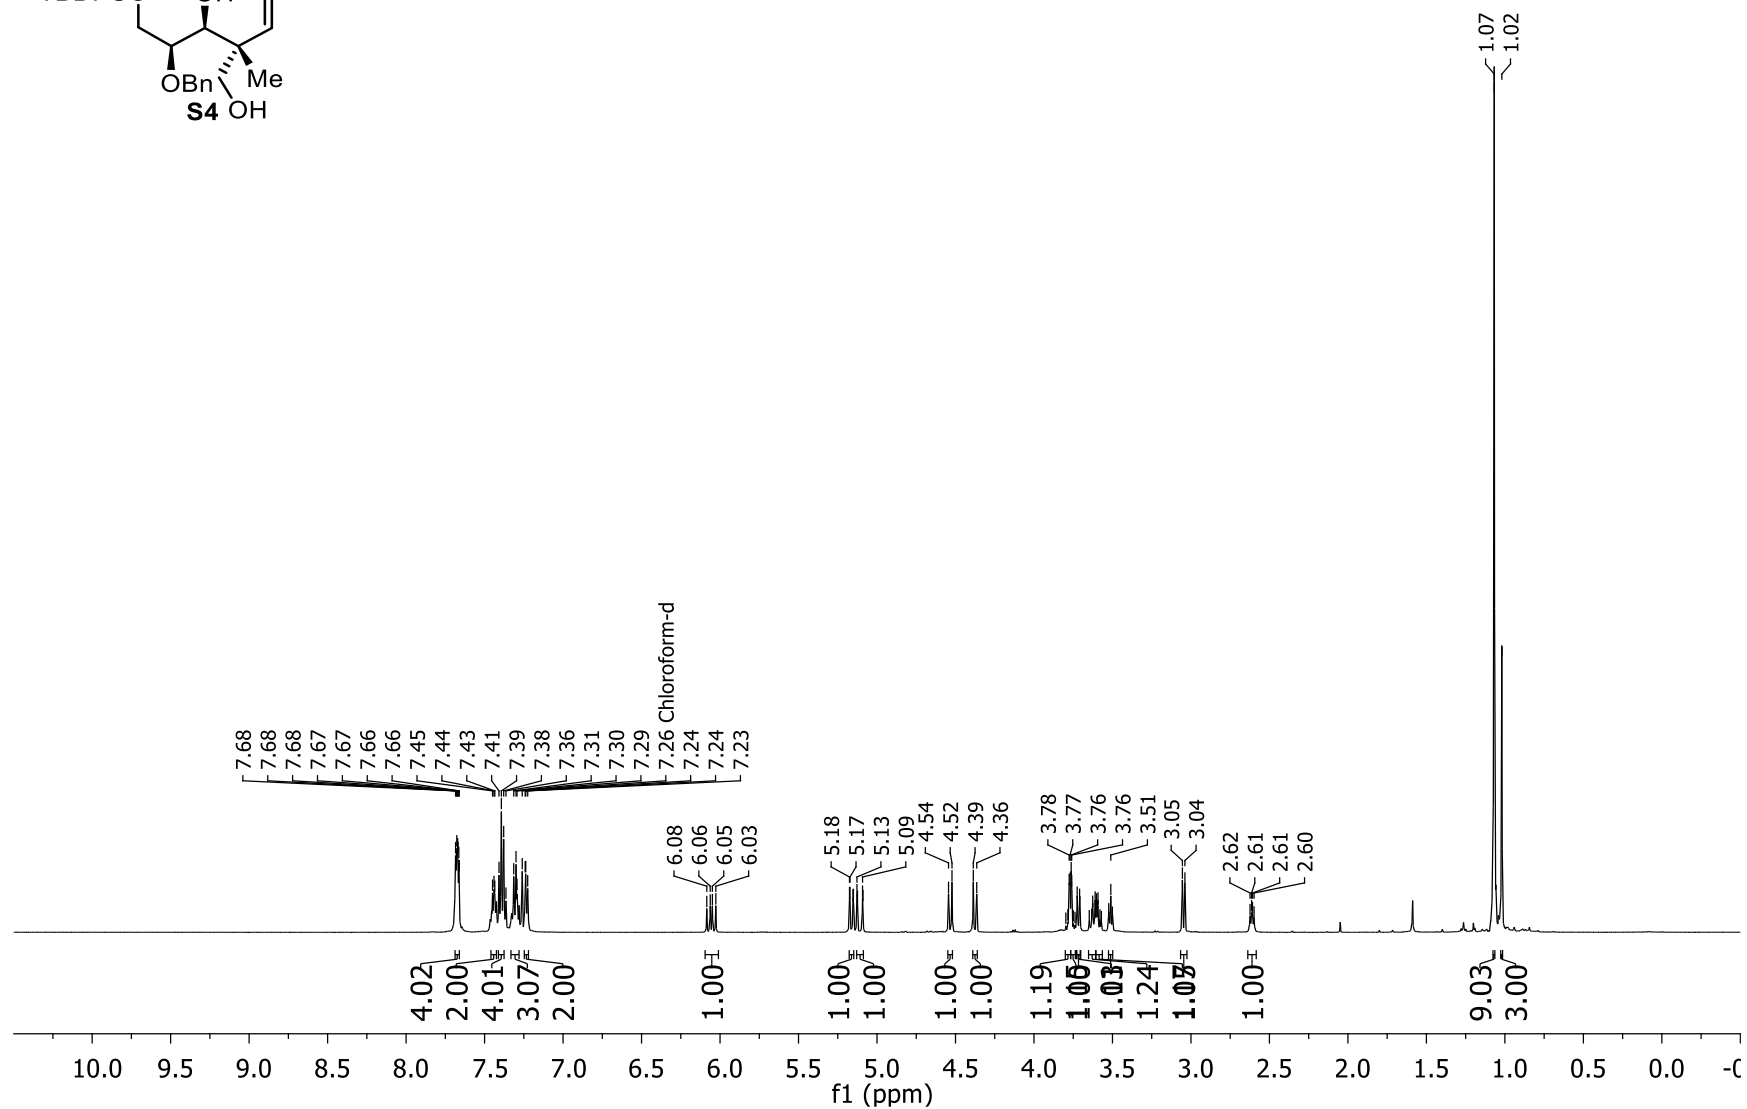

$^{13}\text{C}\{^1\text{H}\}$ -NMR (126 MHz,  $\text{CDCl}_3$ )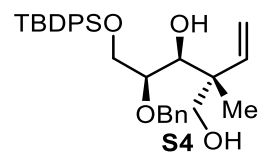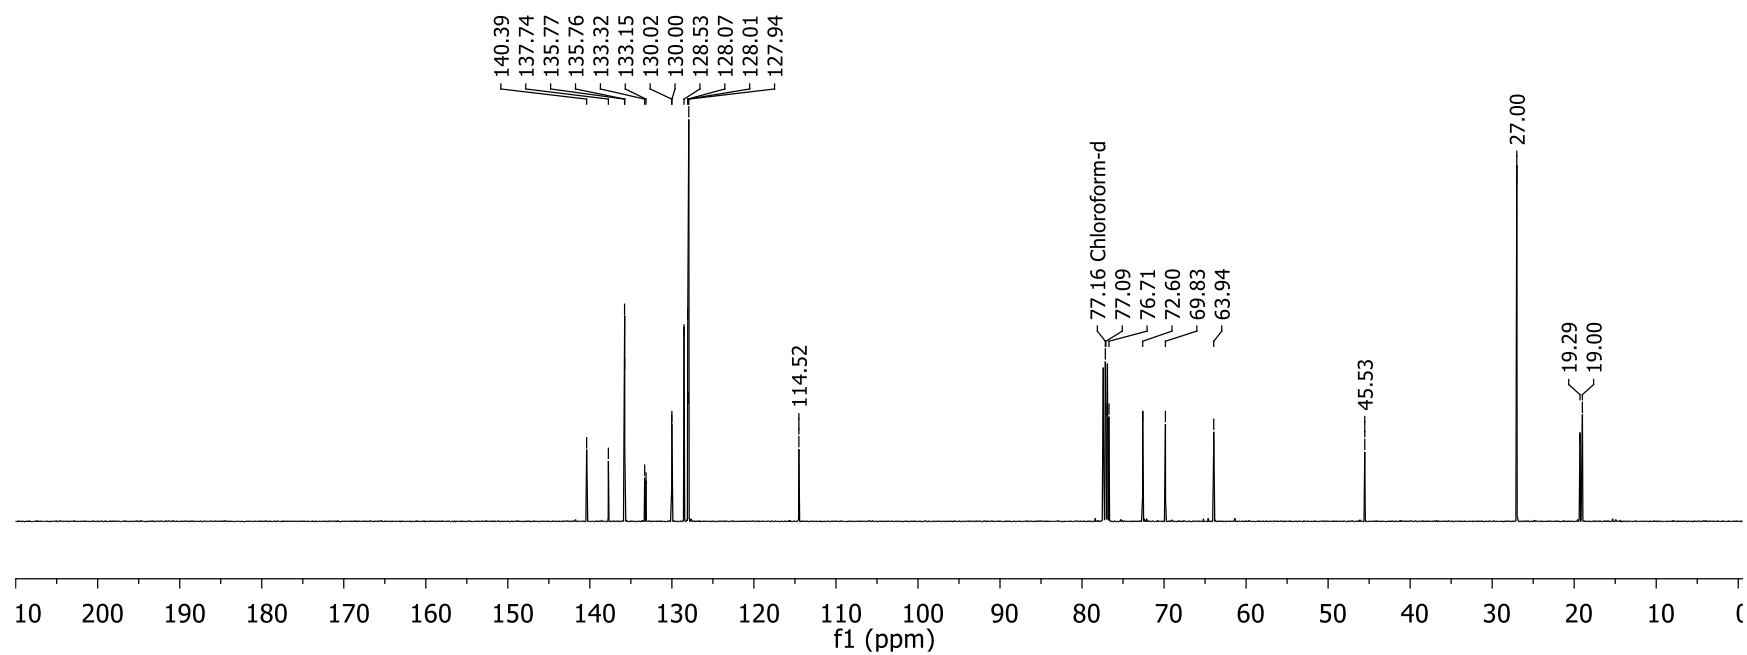

$^1\text{H}$ -NMR (500 MHz,  $\text{CDCl}_3$ )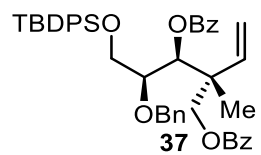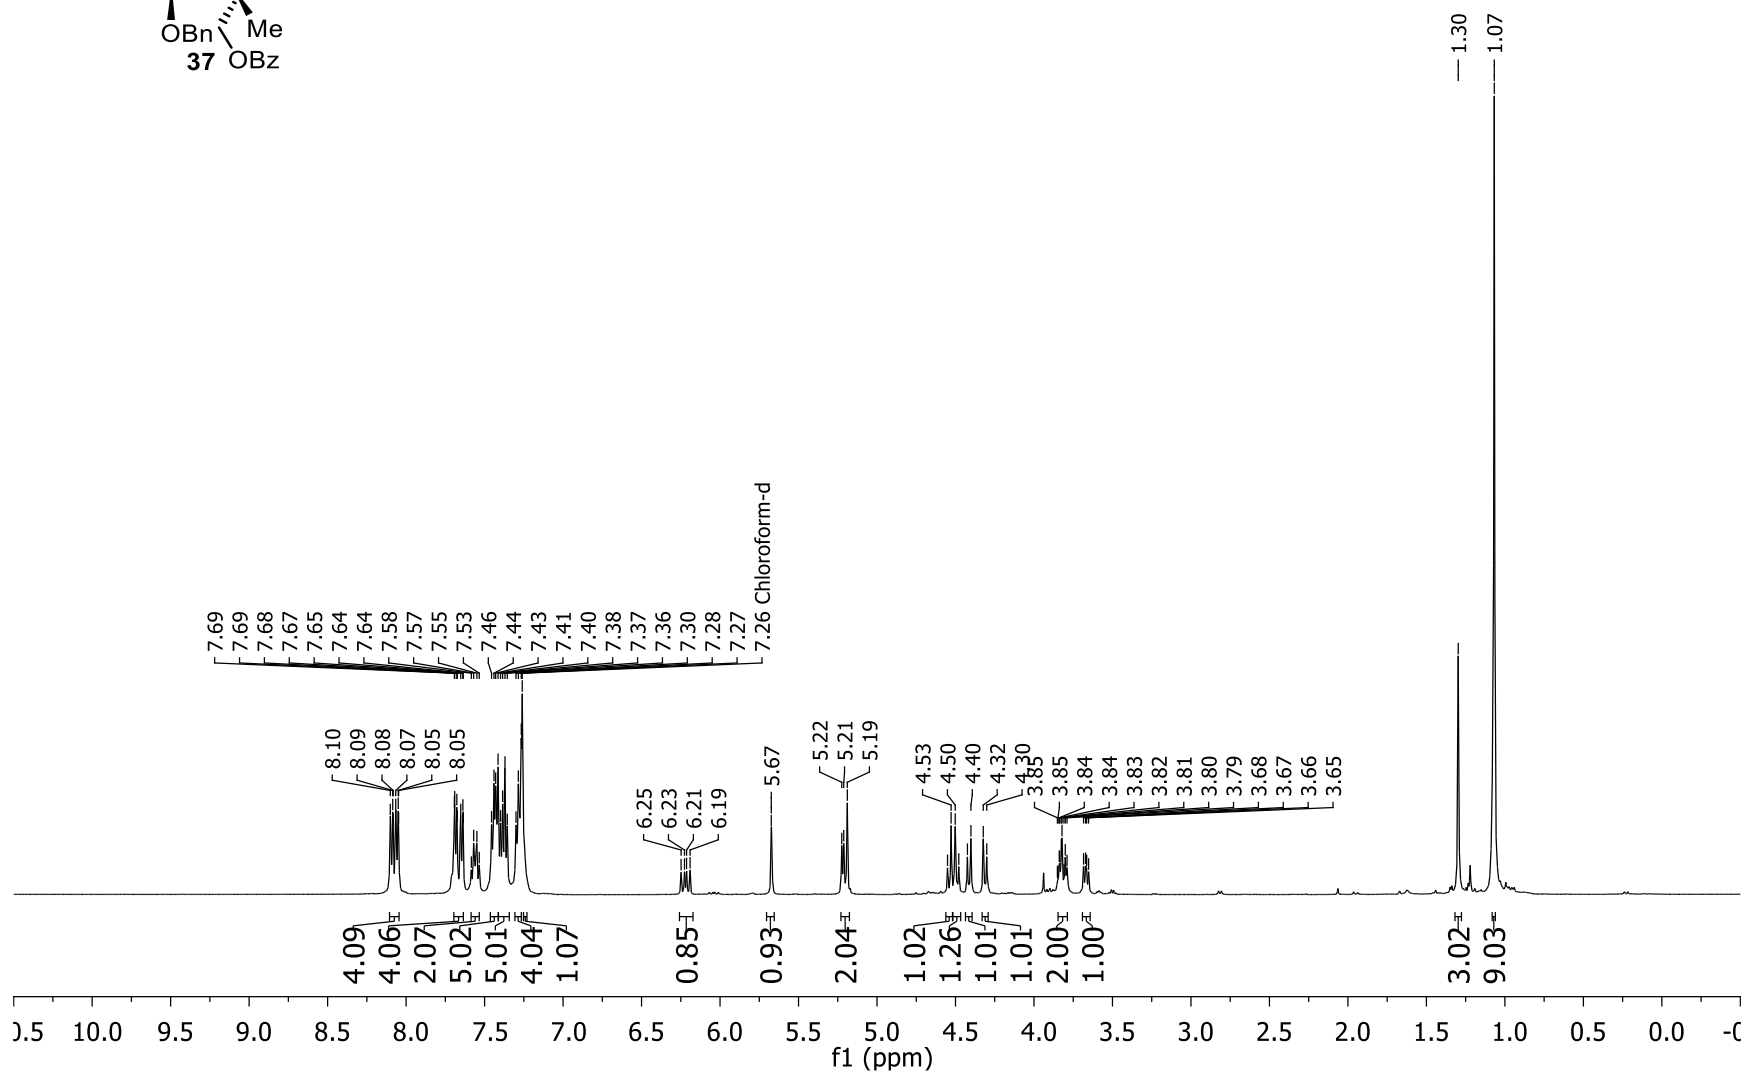

$^{13}\text{C}\{^1\text{H}\}$ -NMR (126 MHz,  $\text{CDCl}_3$ )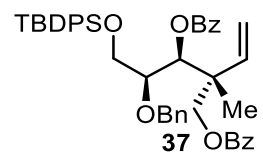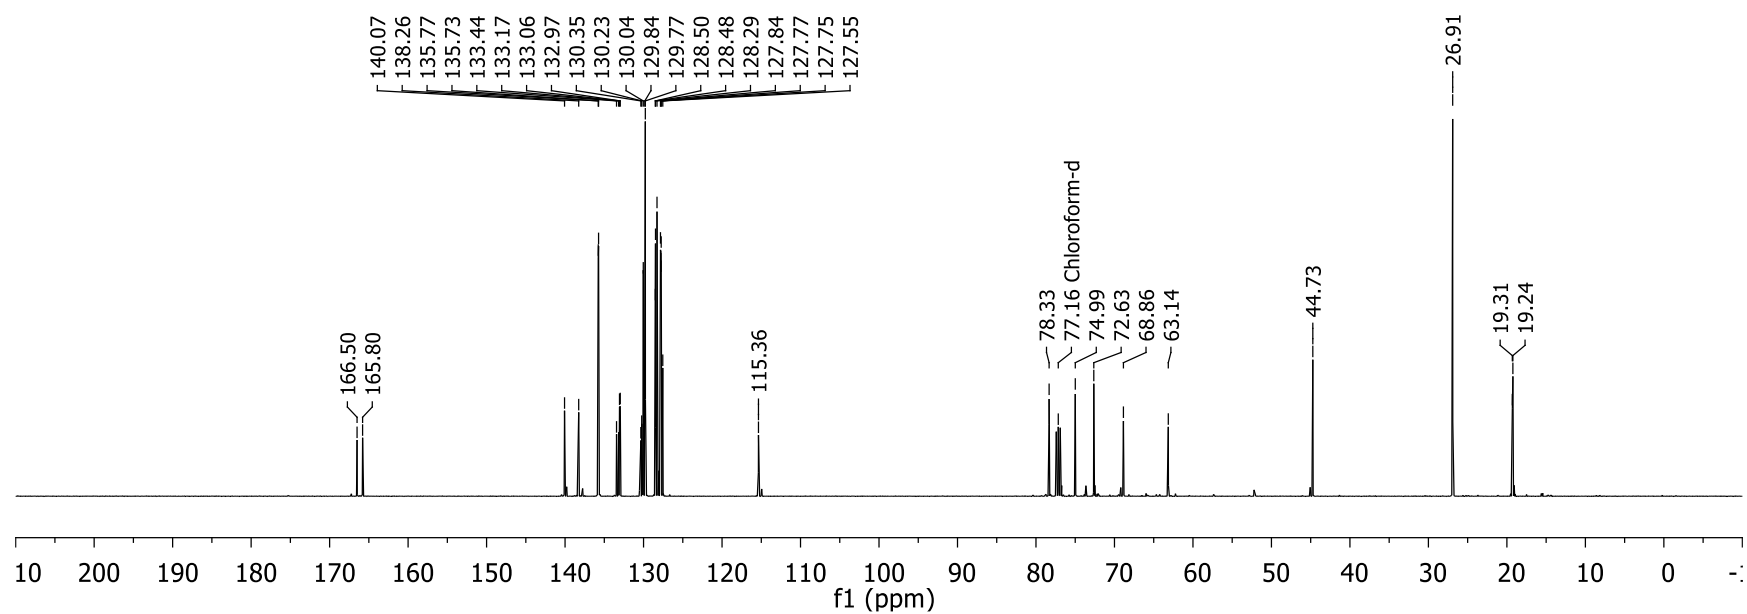

$^1\text{H}$ -NMR (500 MHz,  $\text{CDCl}_3$ )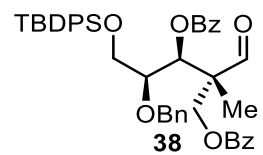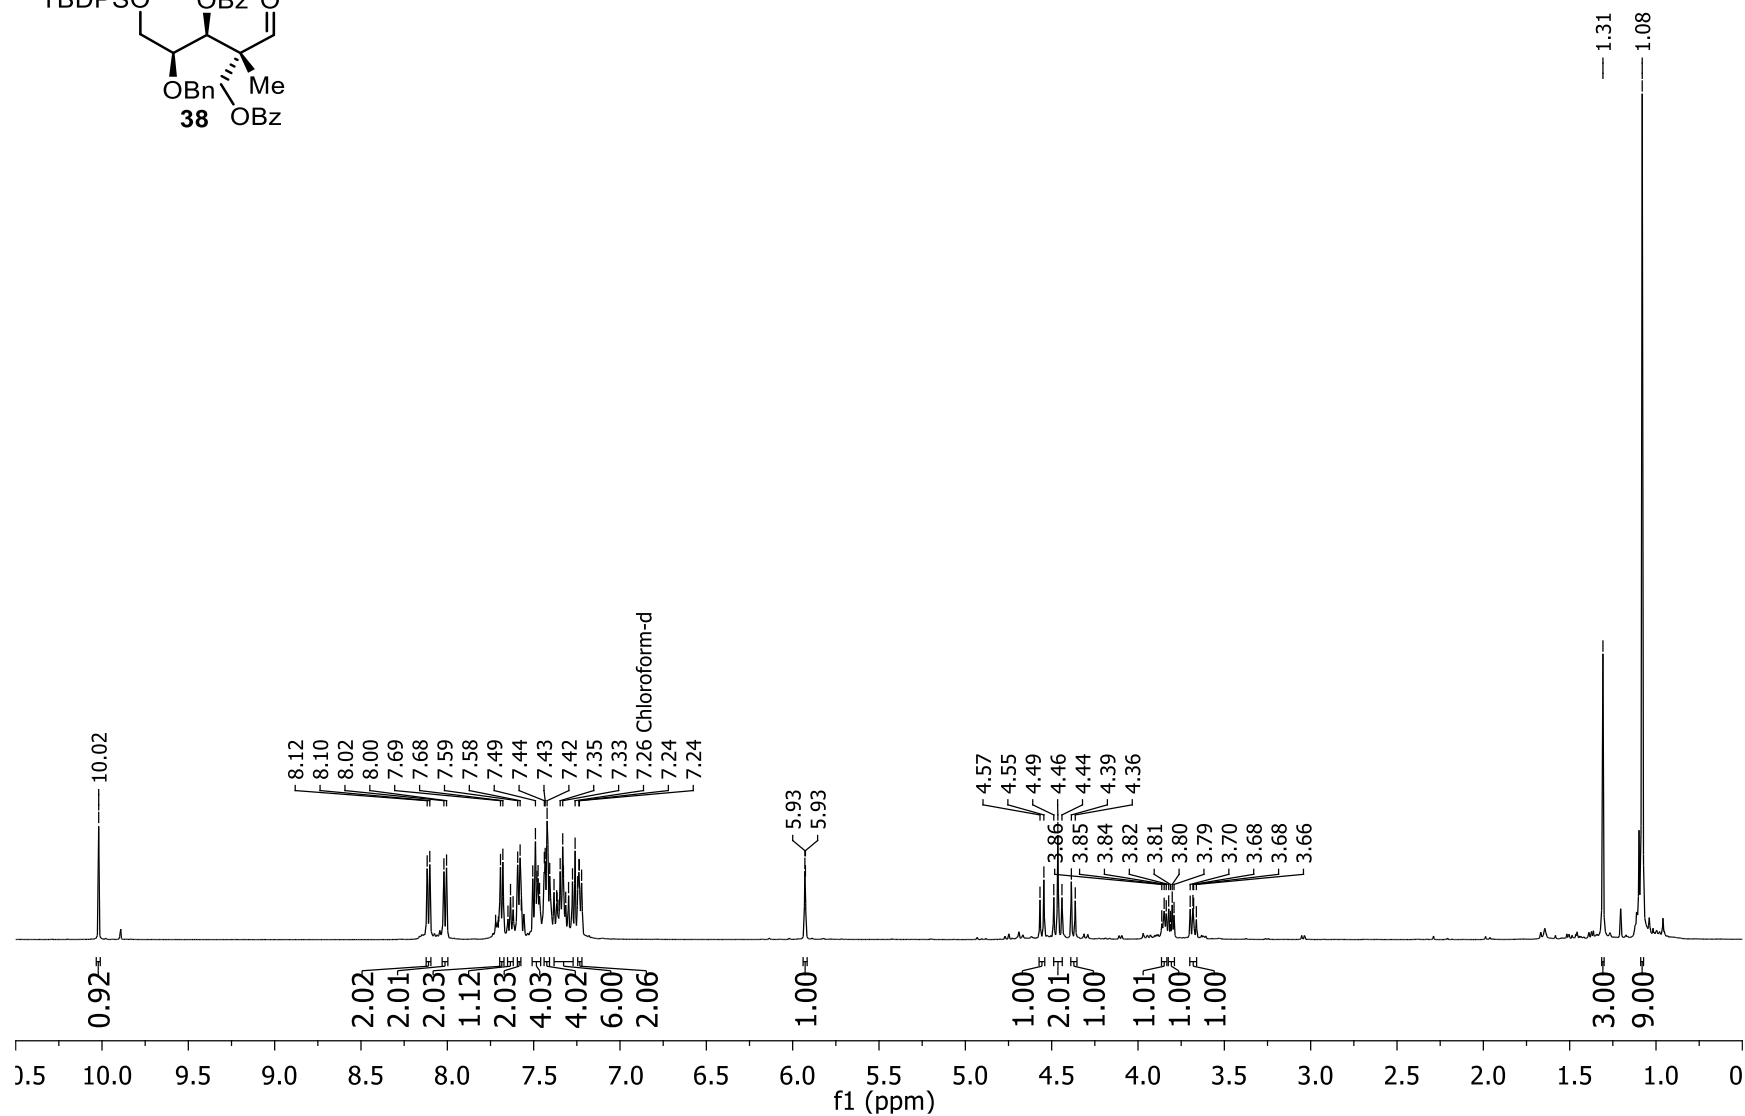



$^{13}\text{C}\{^1\text{H}\}$ -NMR (126 MHz,  $\text{CDCl}_3$ )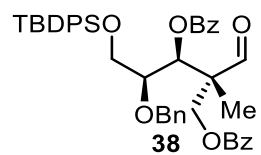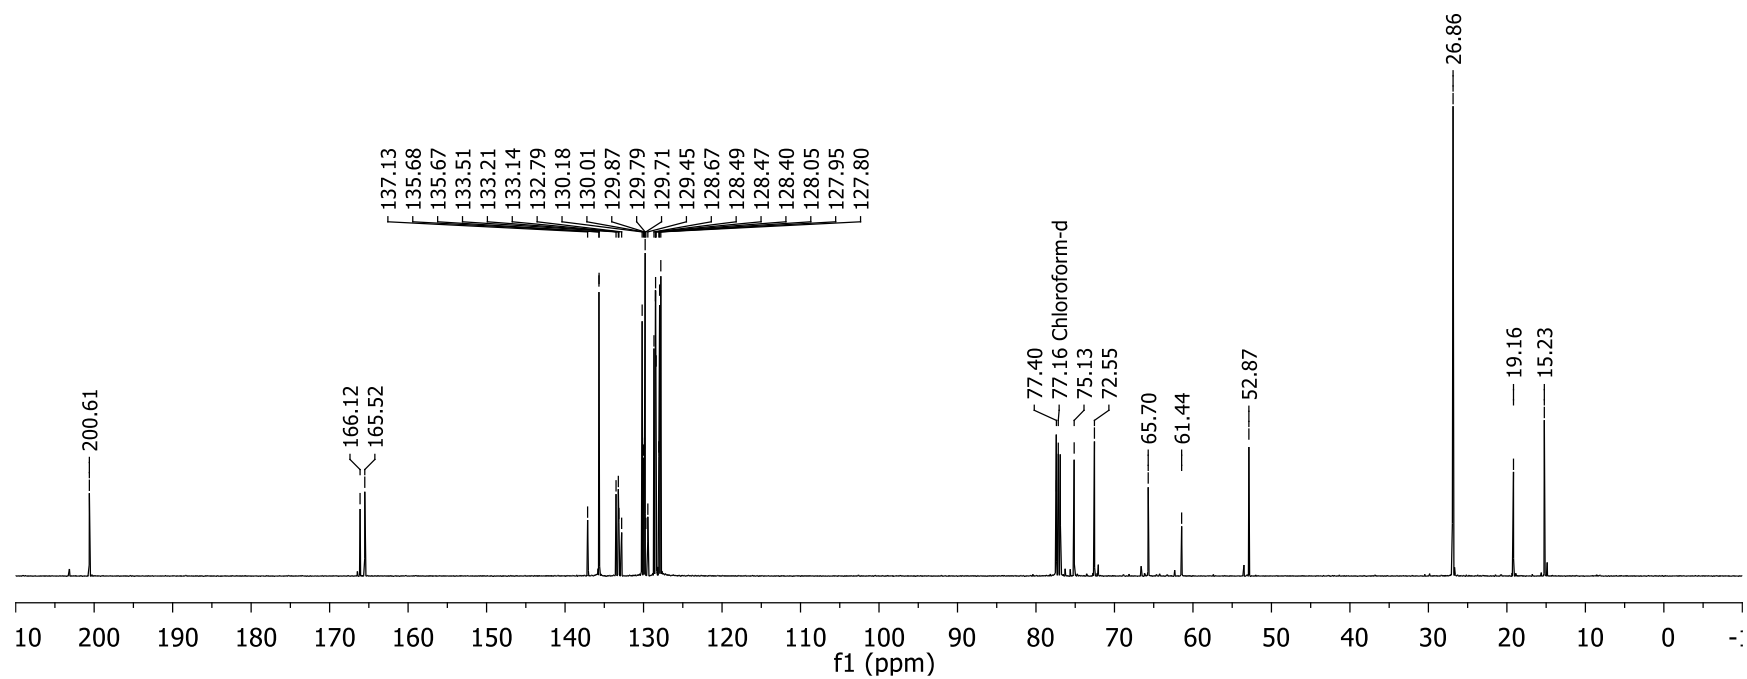

<sup>1</sup>H-NMR (500 MHz, CDCl<sub>3</sub>)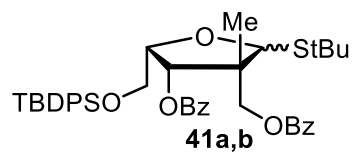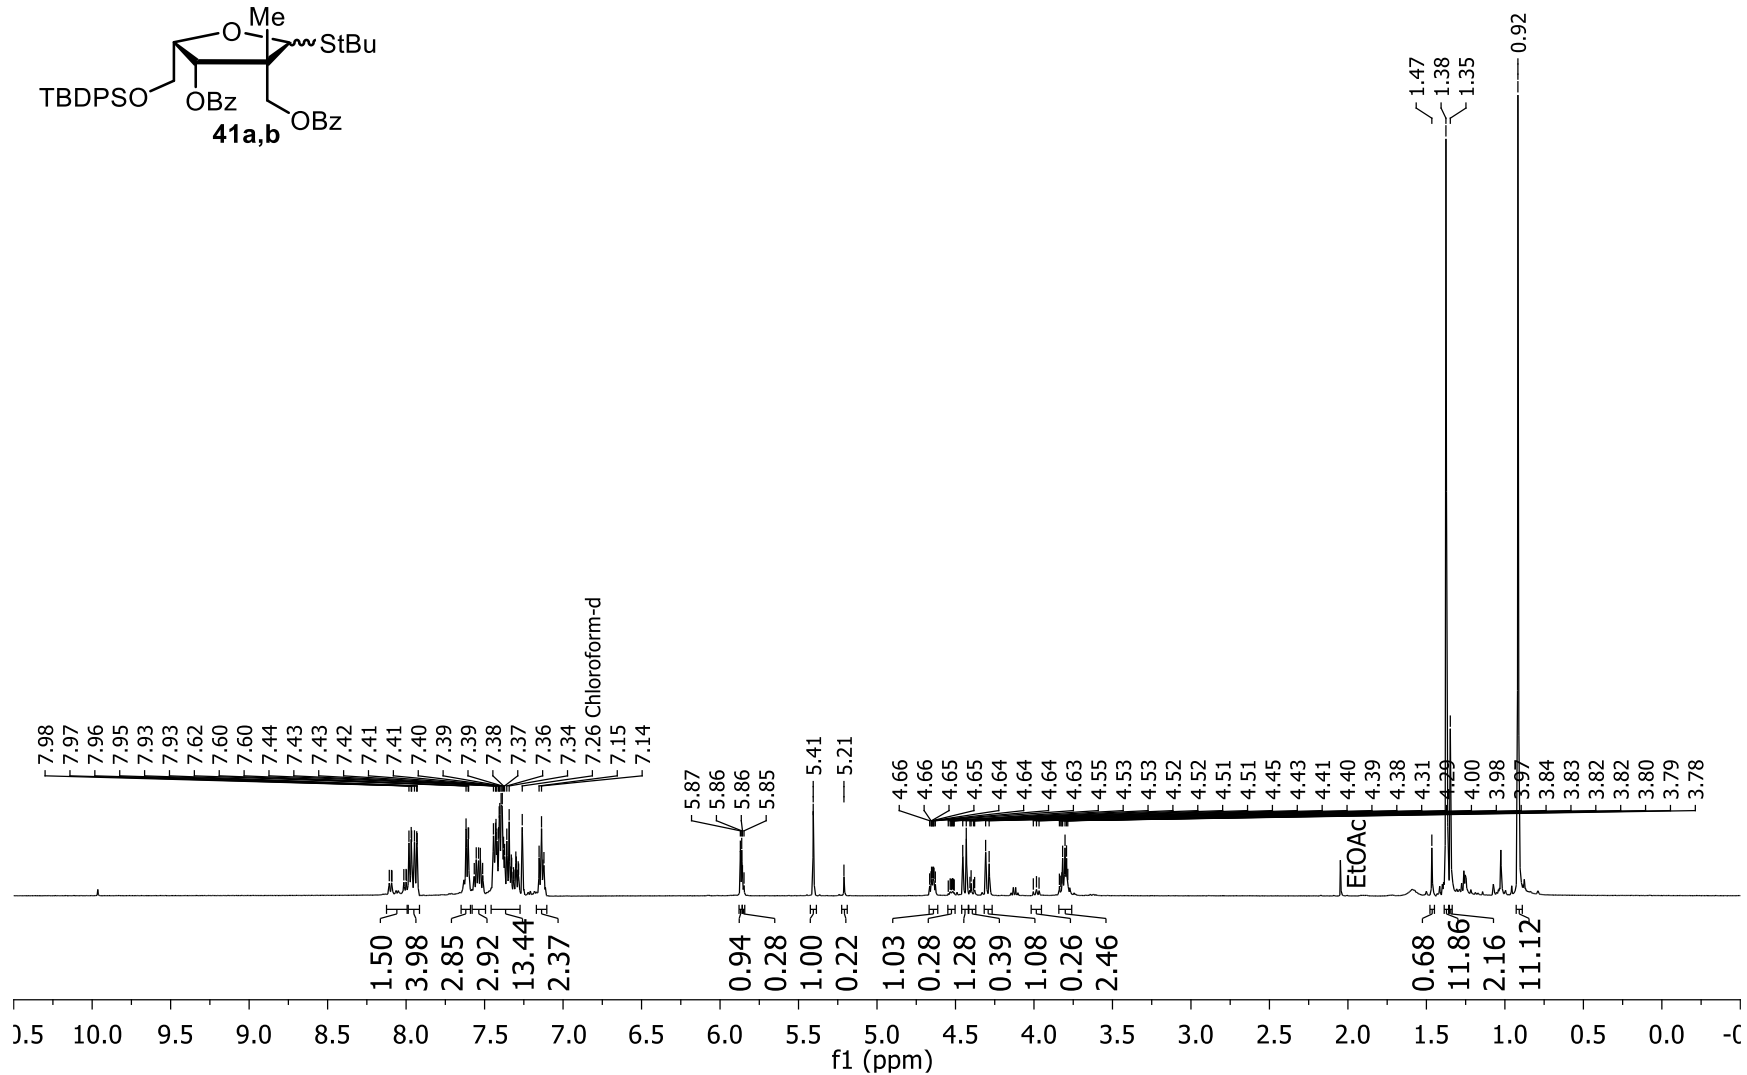

$^{13}\text{C}\{^1\text{H}\}$ -NMR (126 MHz,  $\text{CDCl}_3$ )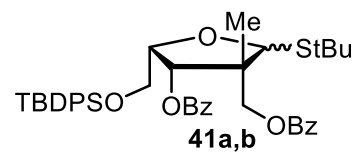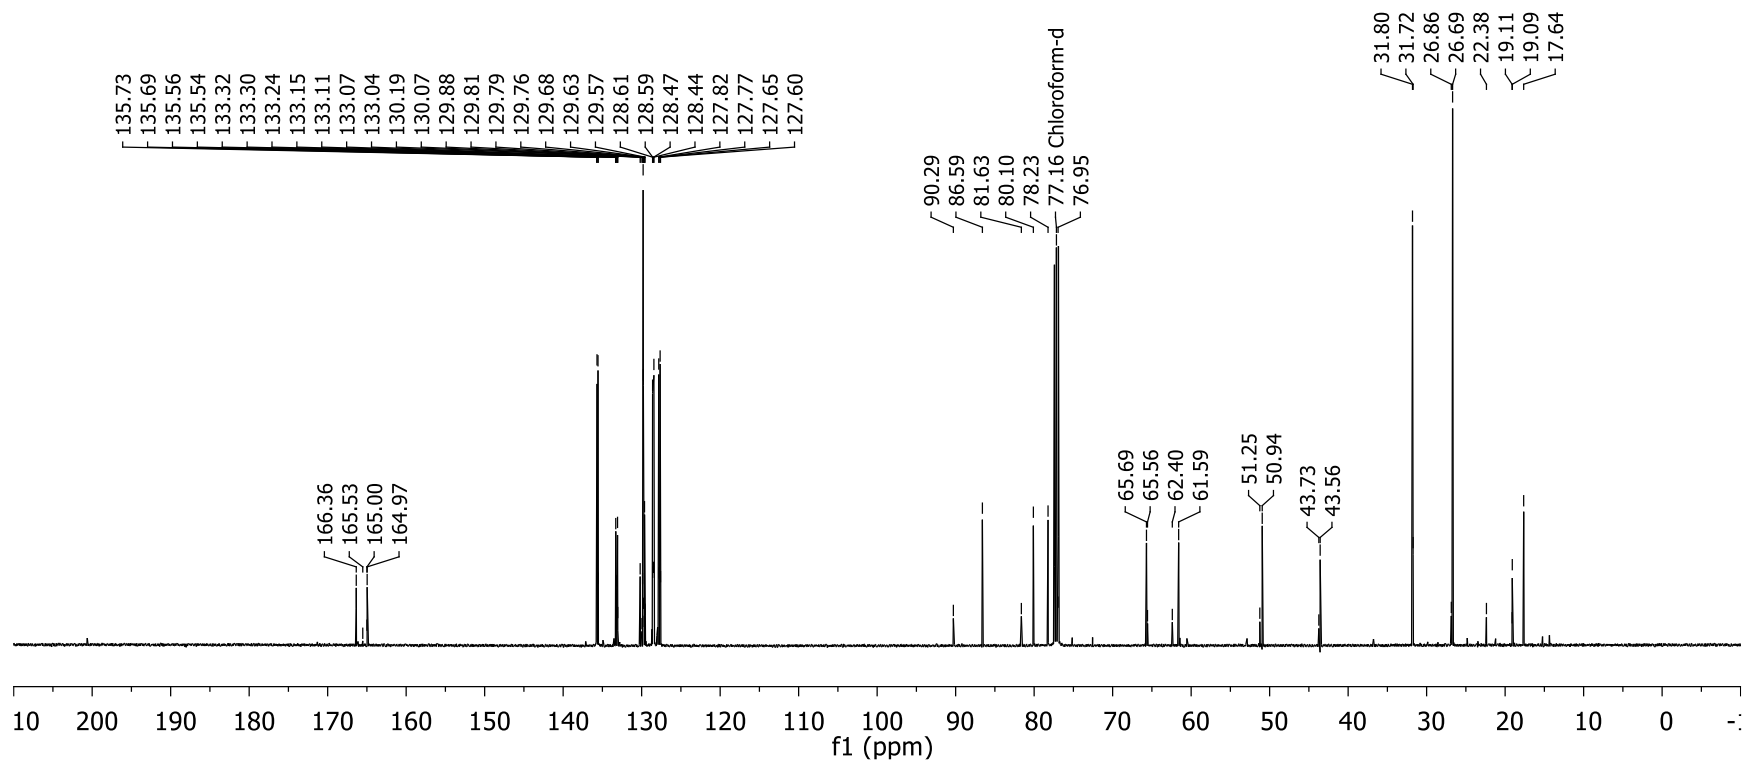

COSY (500 MHz, CDCl<sub>3</sub>)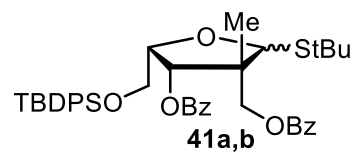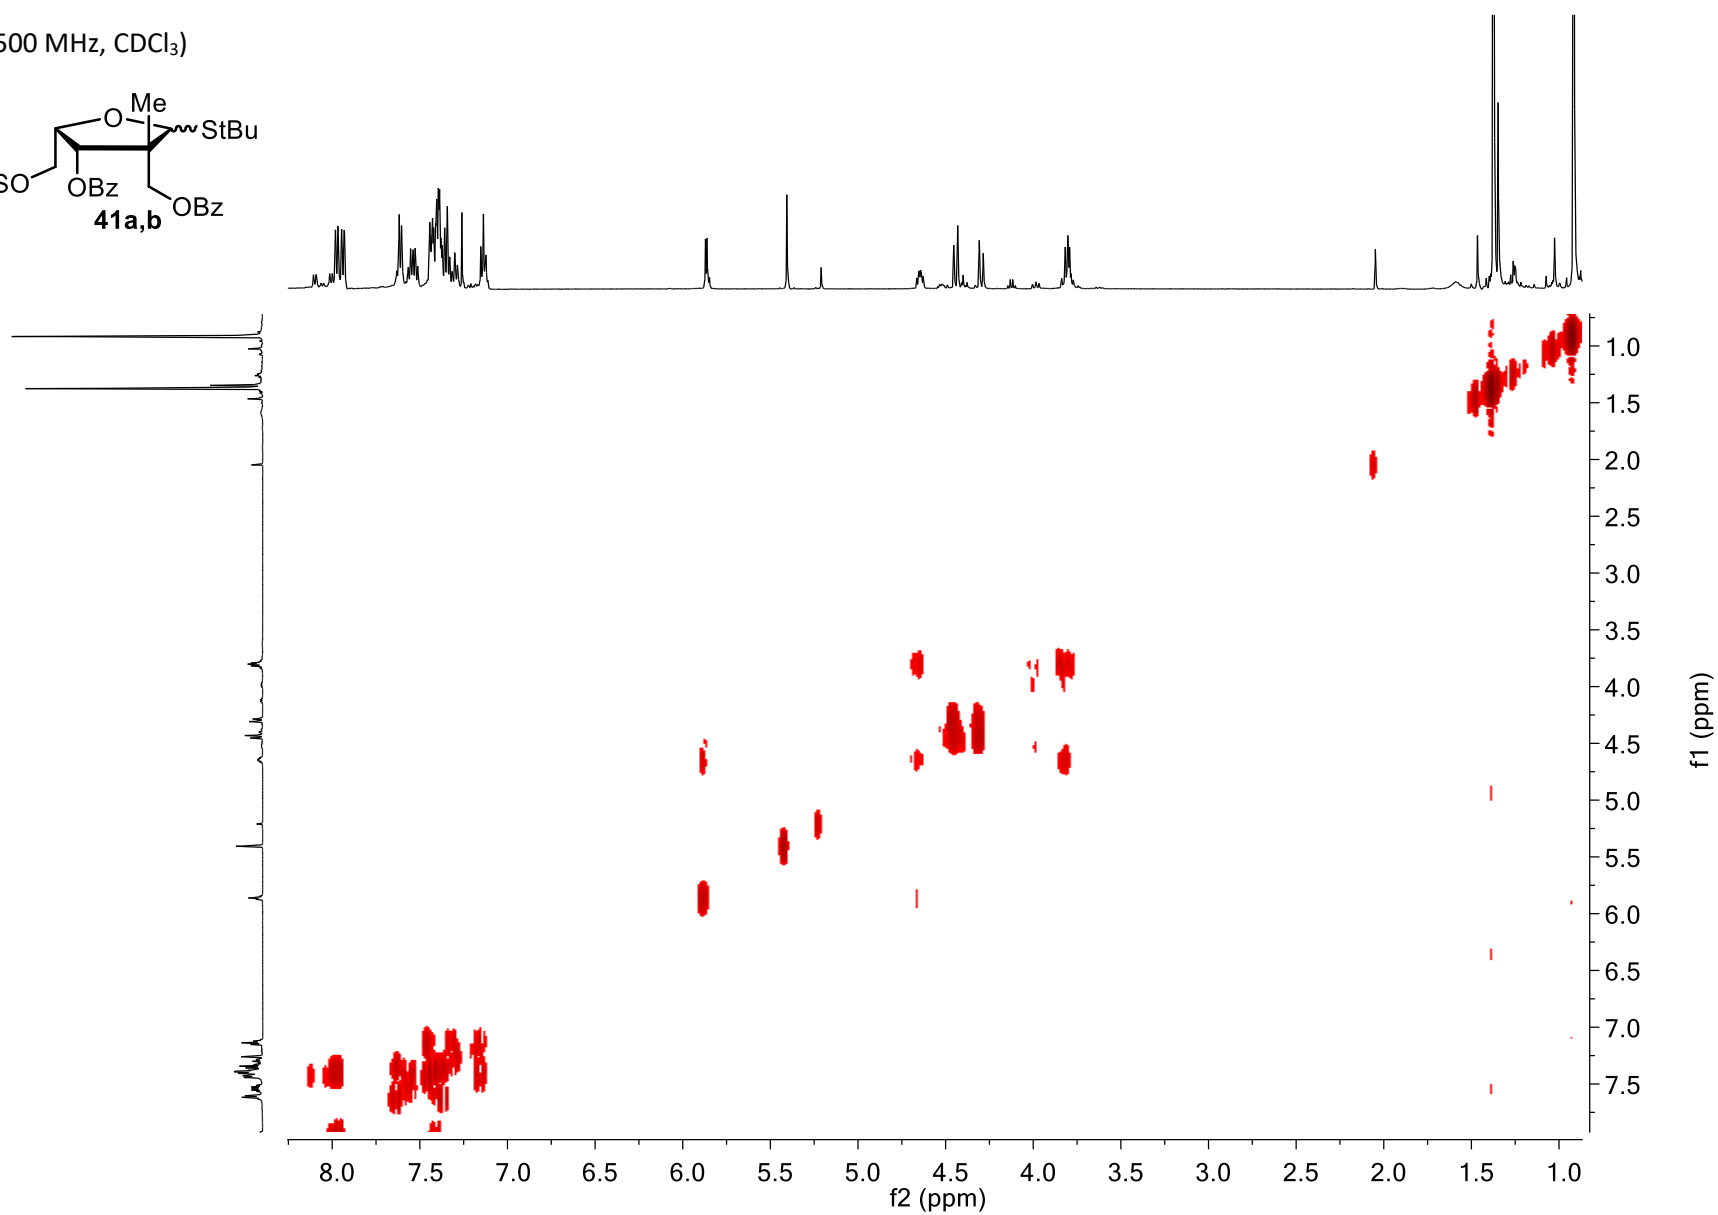

NOESY (500 MHz, CDCl<sub>3</sub>)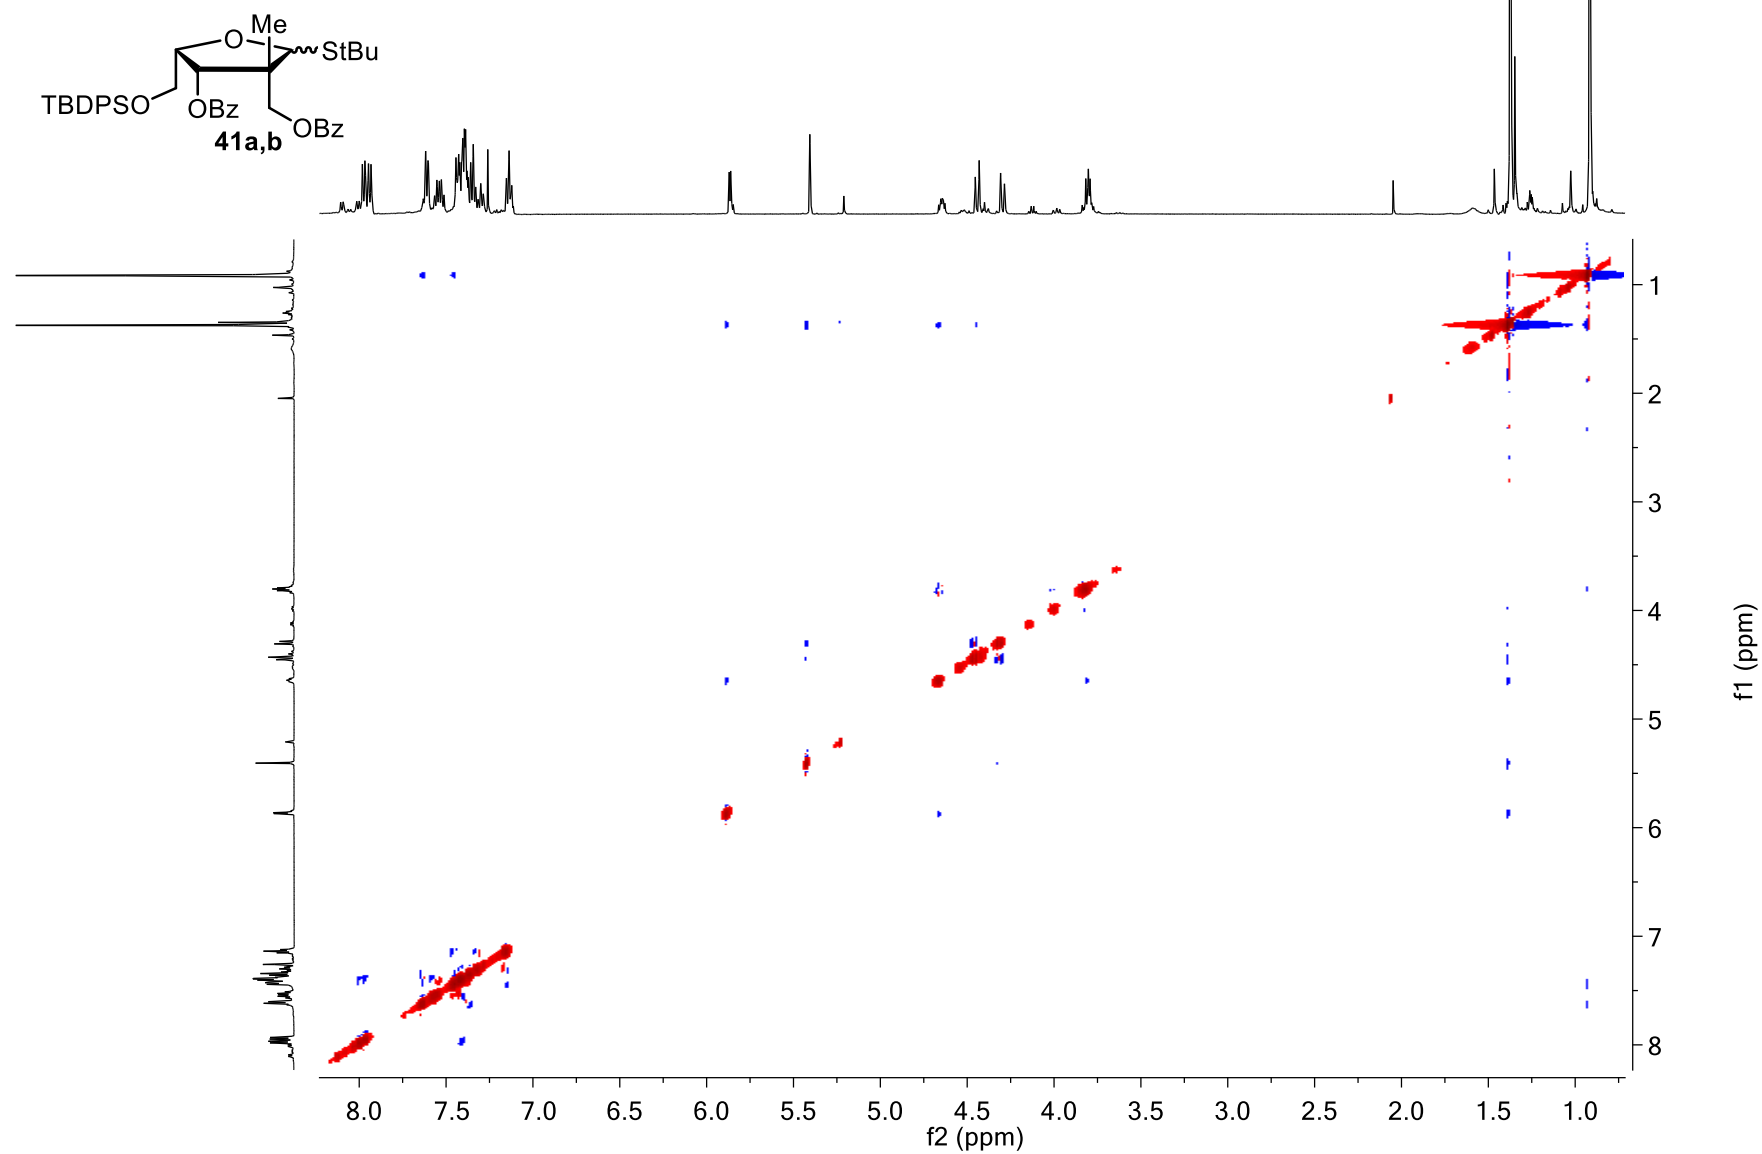

$^1\text{H}$ -NMR (500 MHz,  $\text{CDCl}_3$ )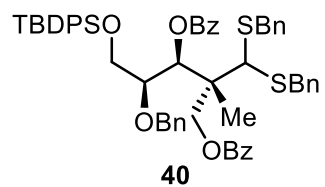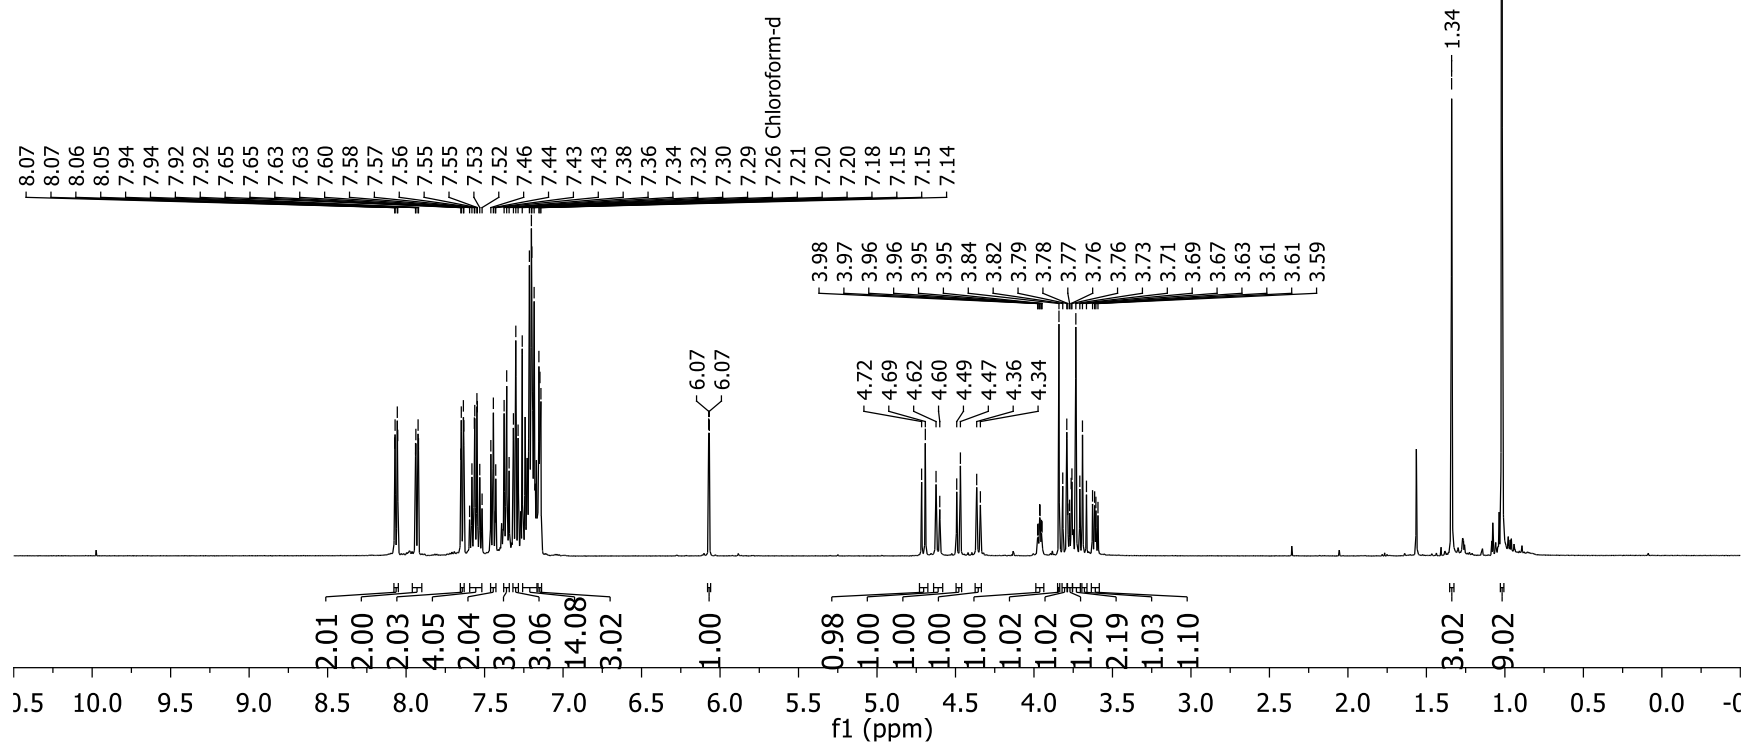

$^{13}\text{C}\{^1\text{H}\}$ -NMR (126 MHz,  $\text{CDCl}_3$ )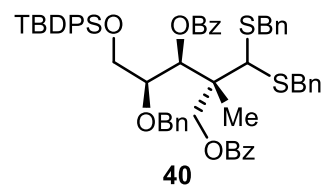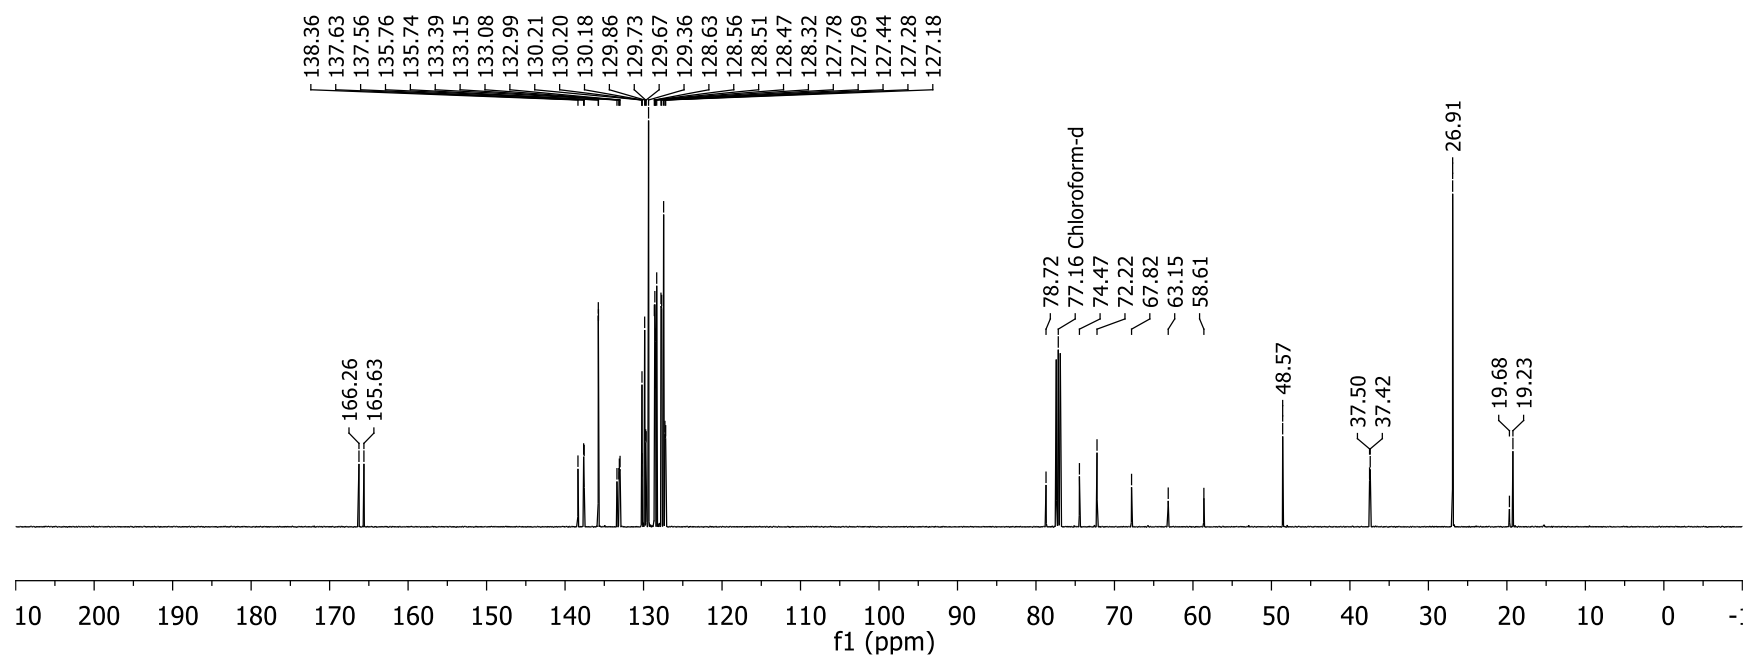

$^1\text{H}$ -NMR (500 MHz,  $\text{CDCl}_3$ )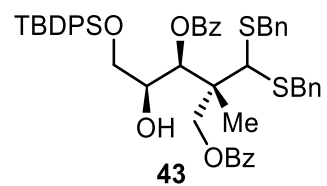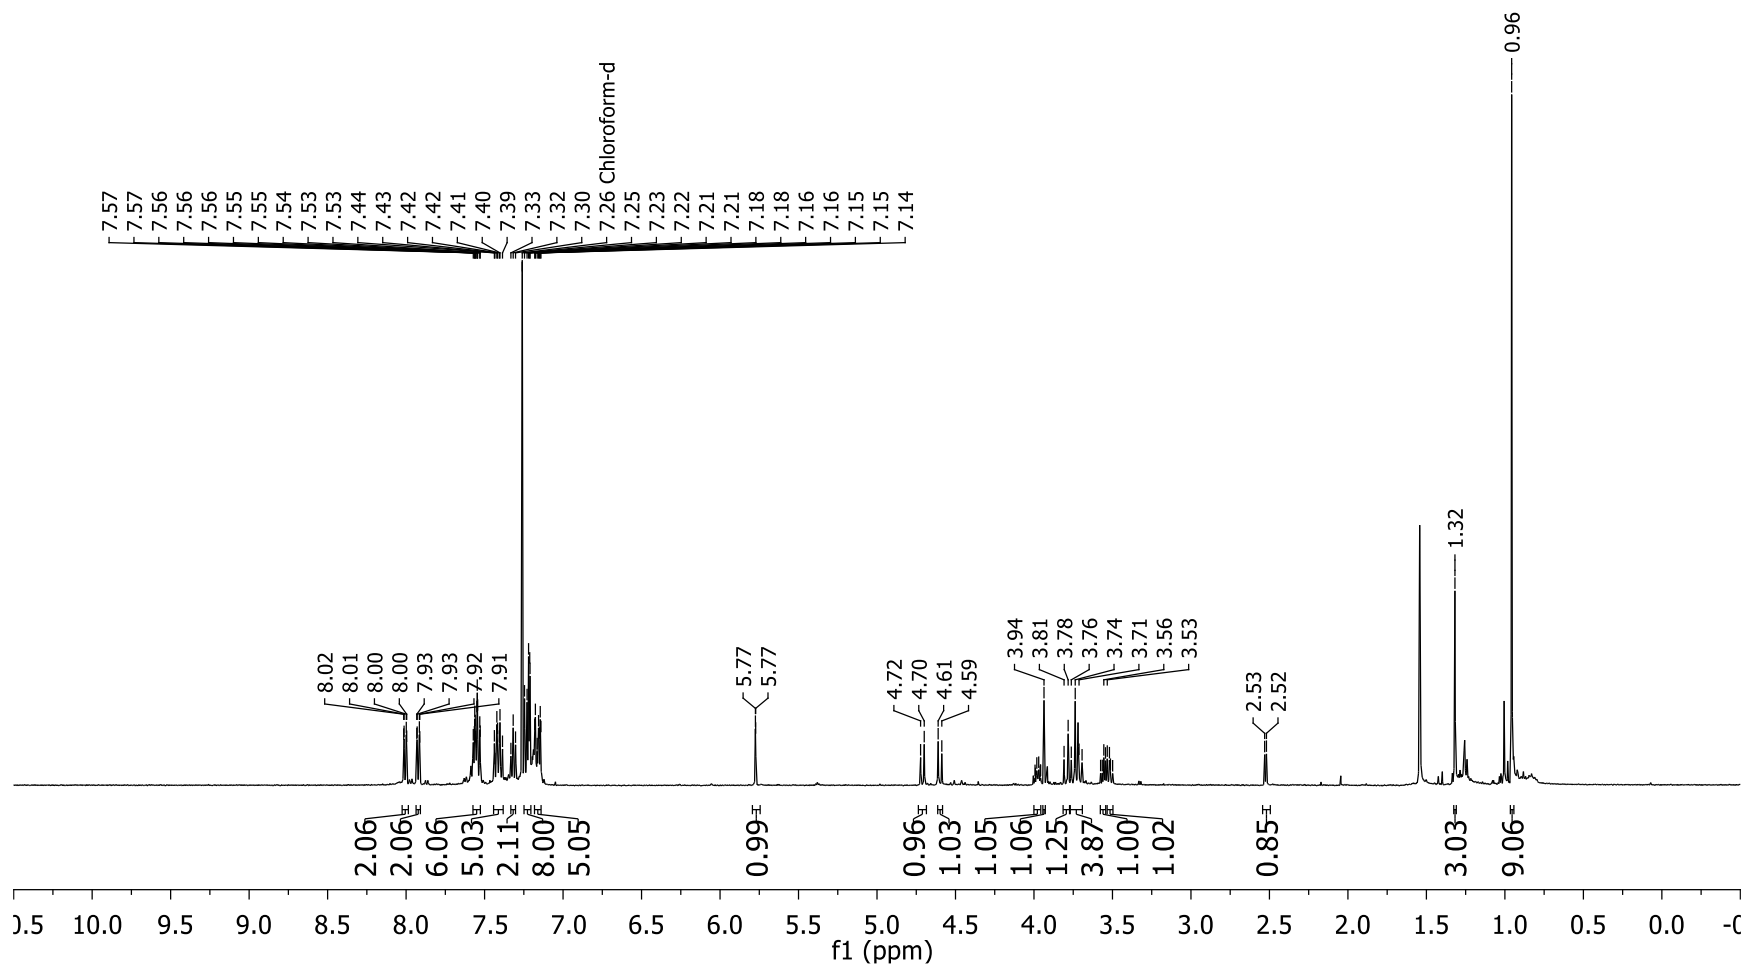



$^{13}\text{C}\{^1\text{H}\}$ -NMR (126 MHz,  $\text{CDCl}_3$ )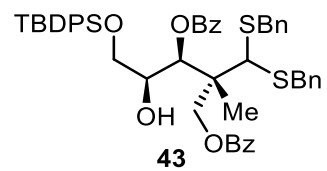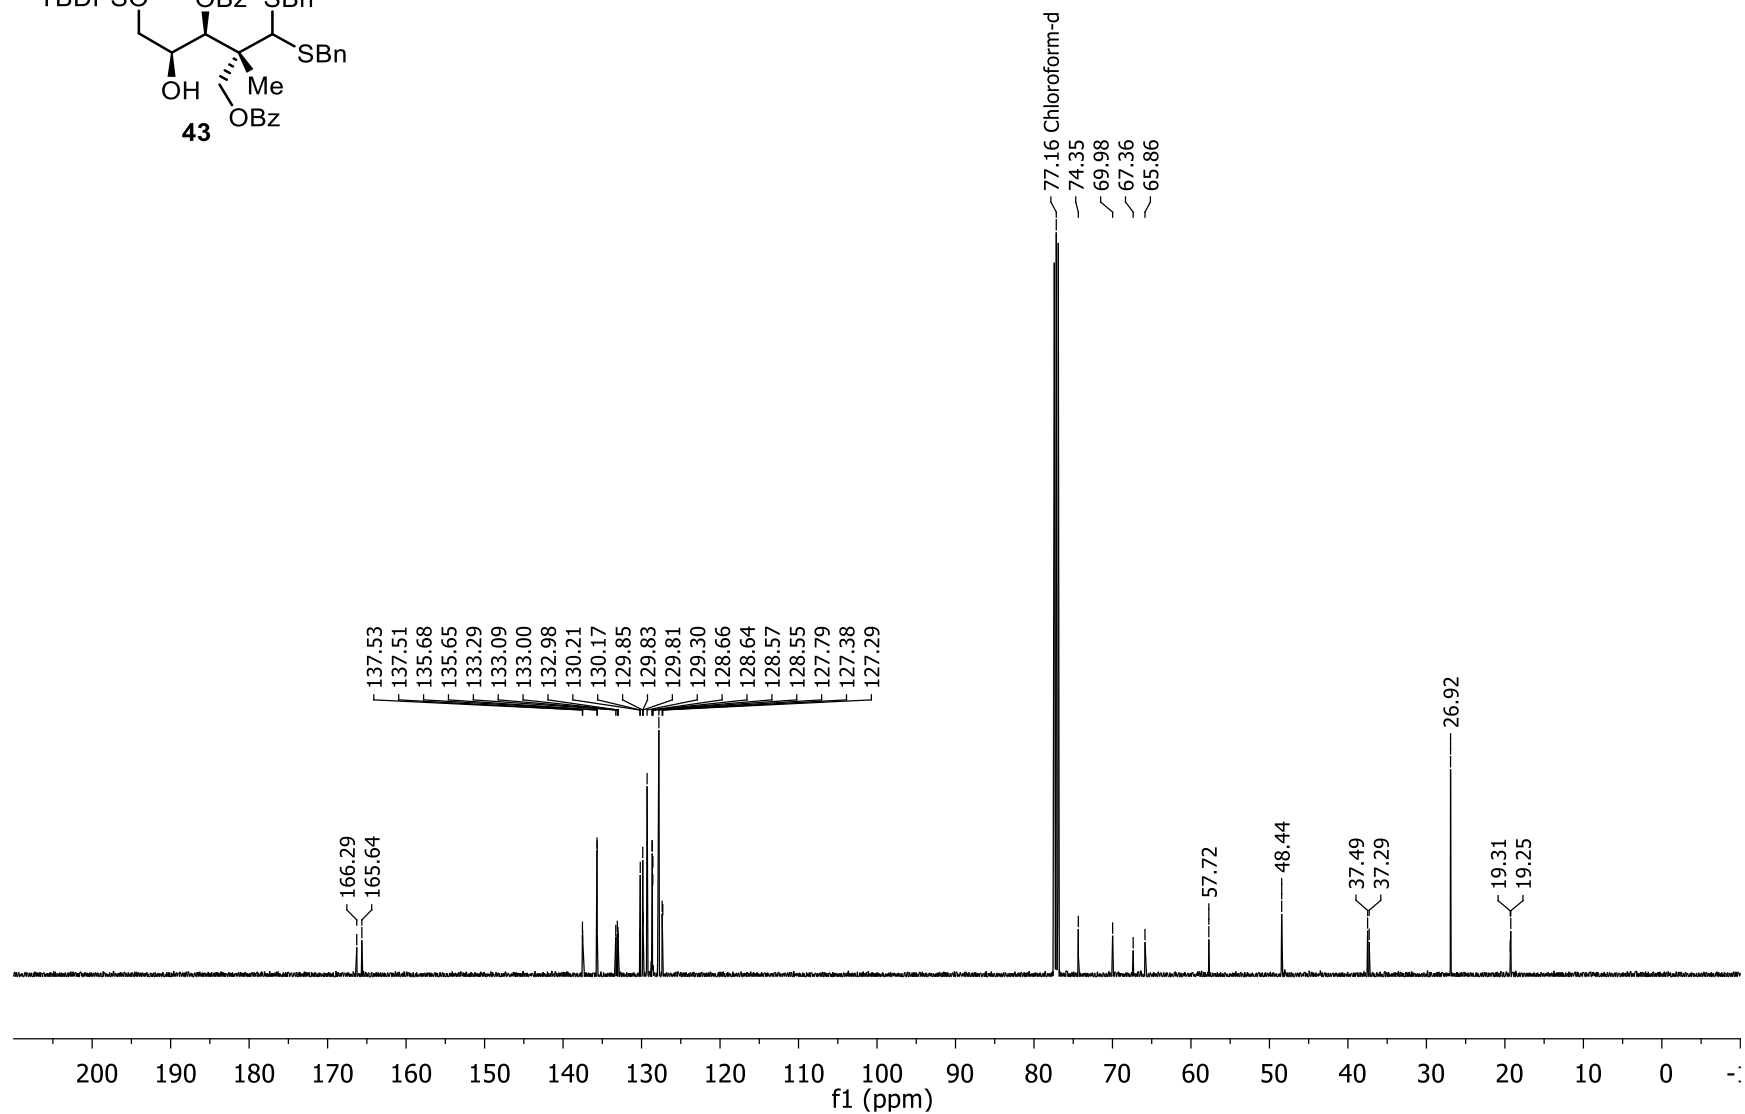

$^1\text{H}$ -NMR (500 MHz,  $\text{CDCl}_3$ )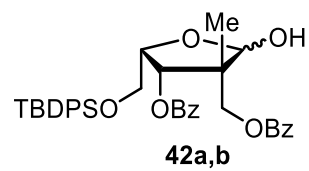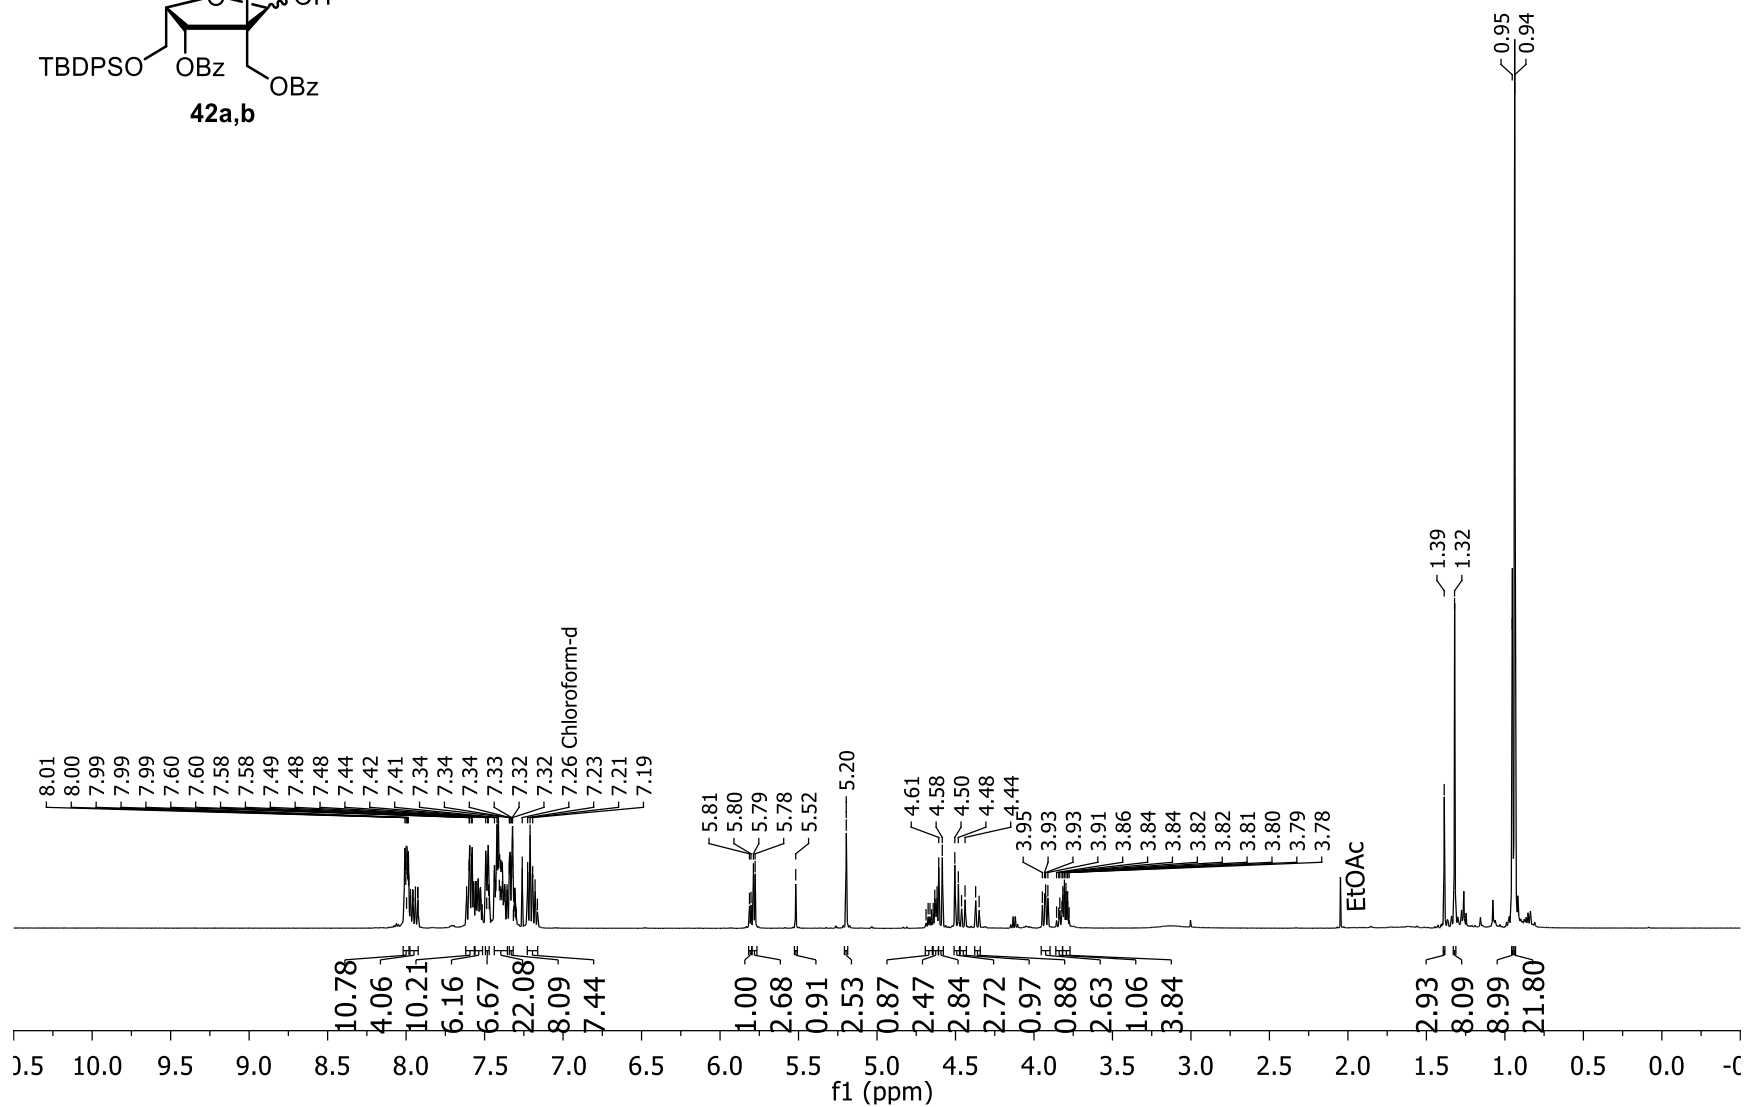

$^{13}\text{C}\{^1\text{H}\}$ -NMR (126 MHz,  $\text{CDCl}_3$ )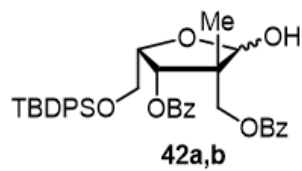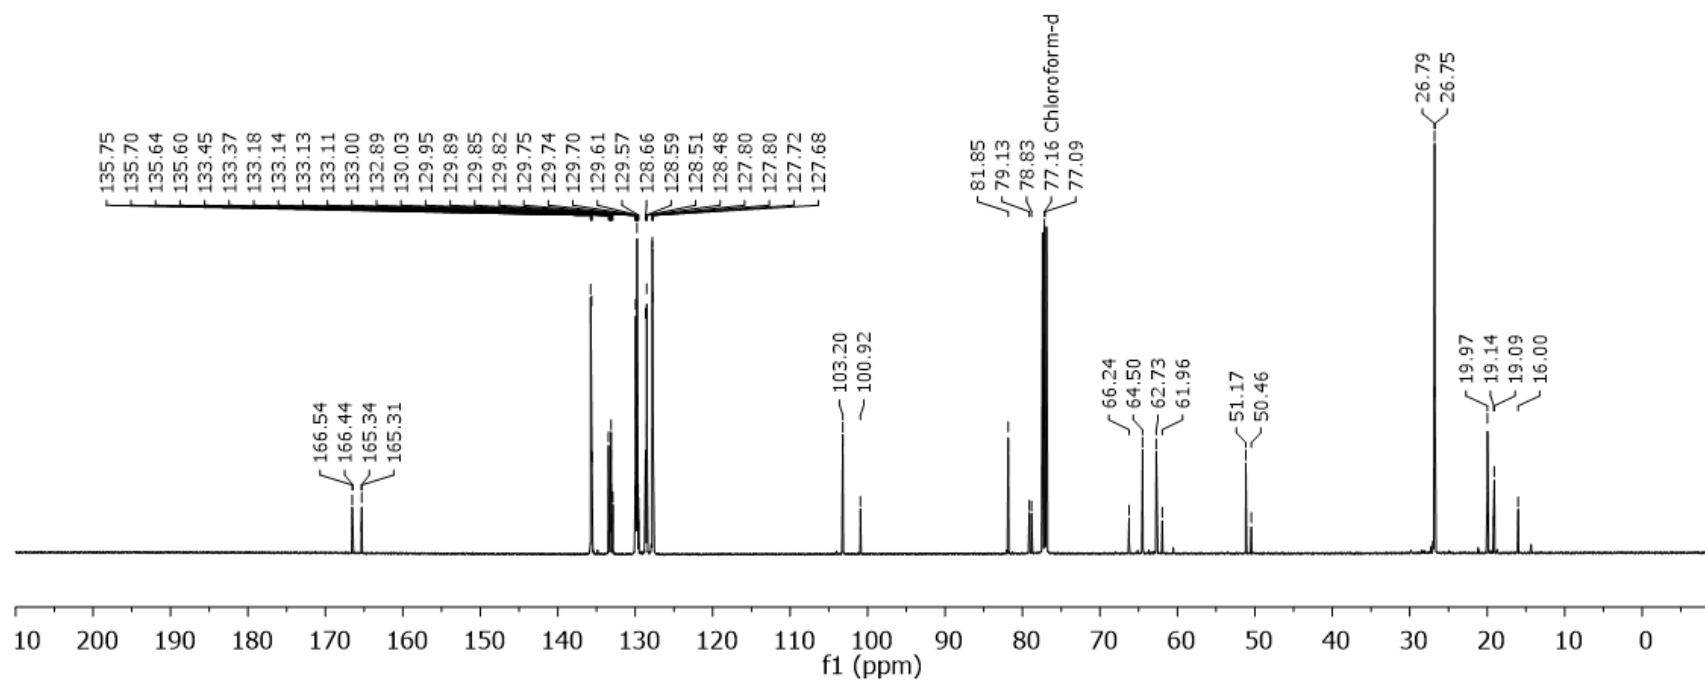

HSQC (500 MHz, CDCl<sub>3</sub>)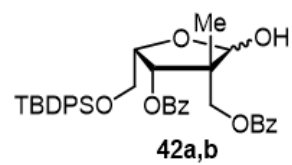

42a,b

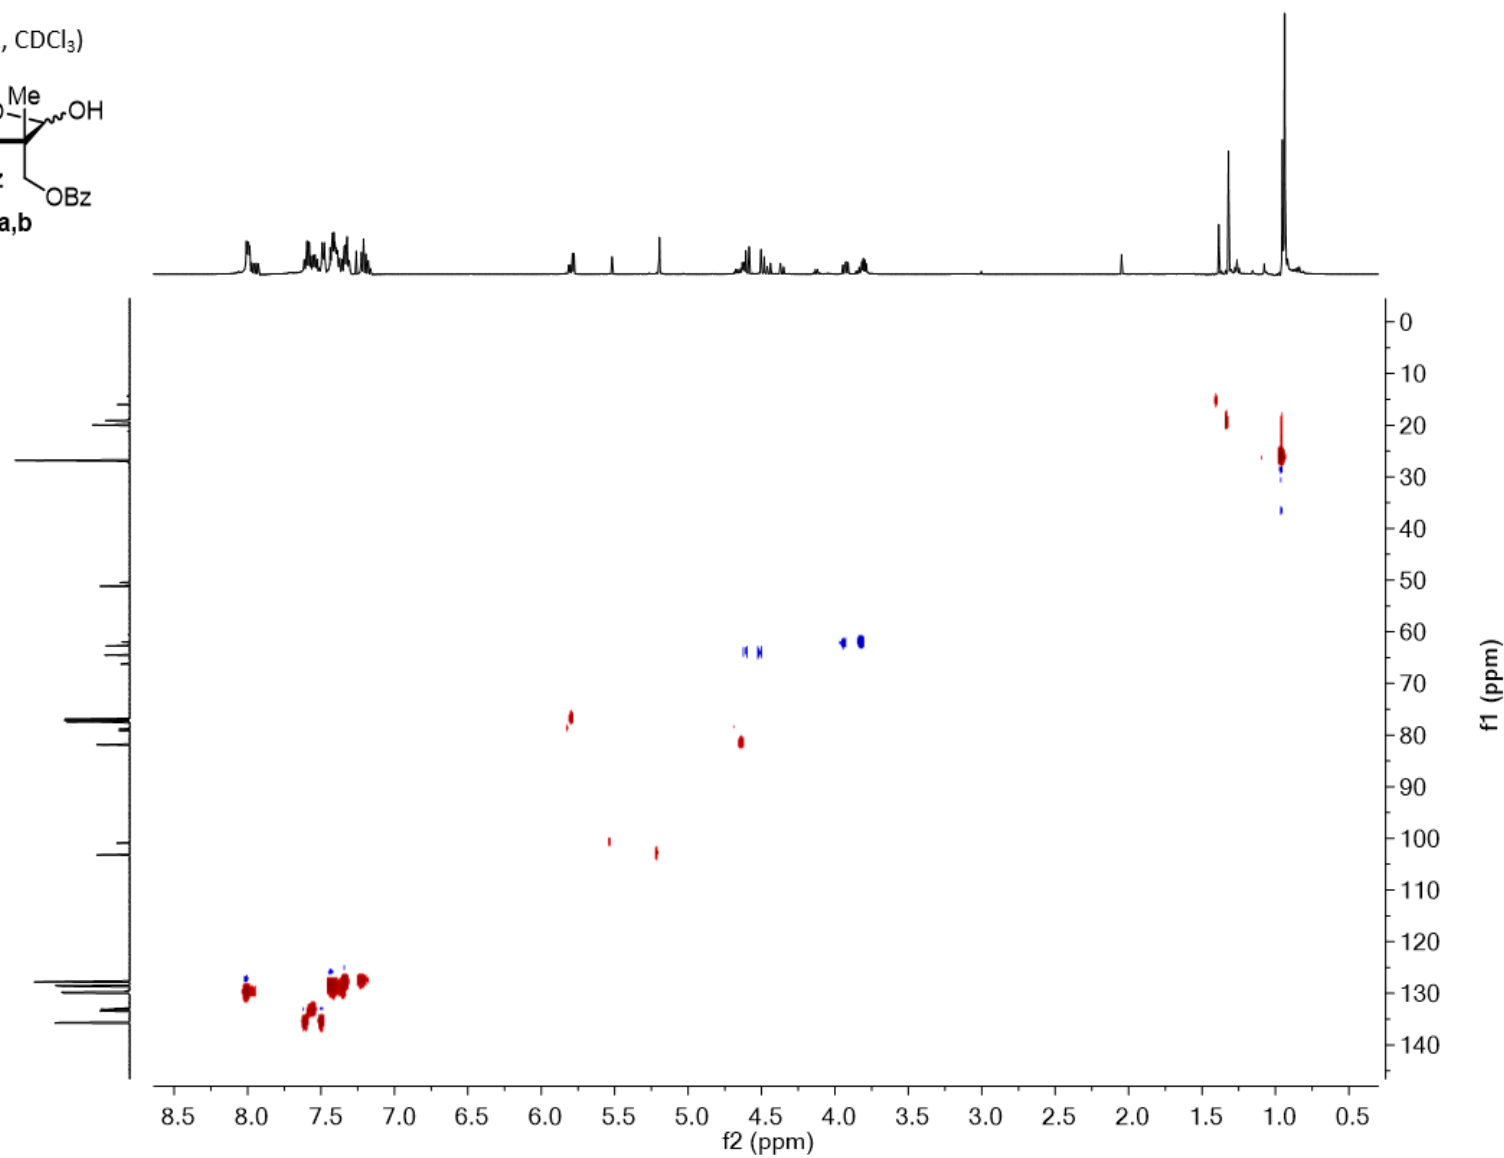

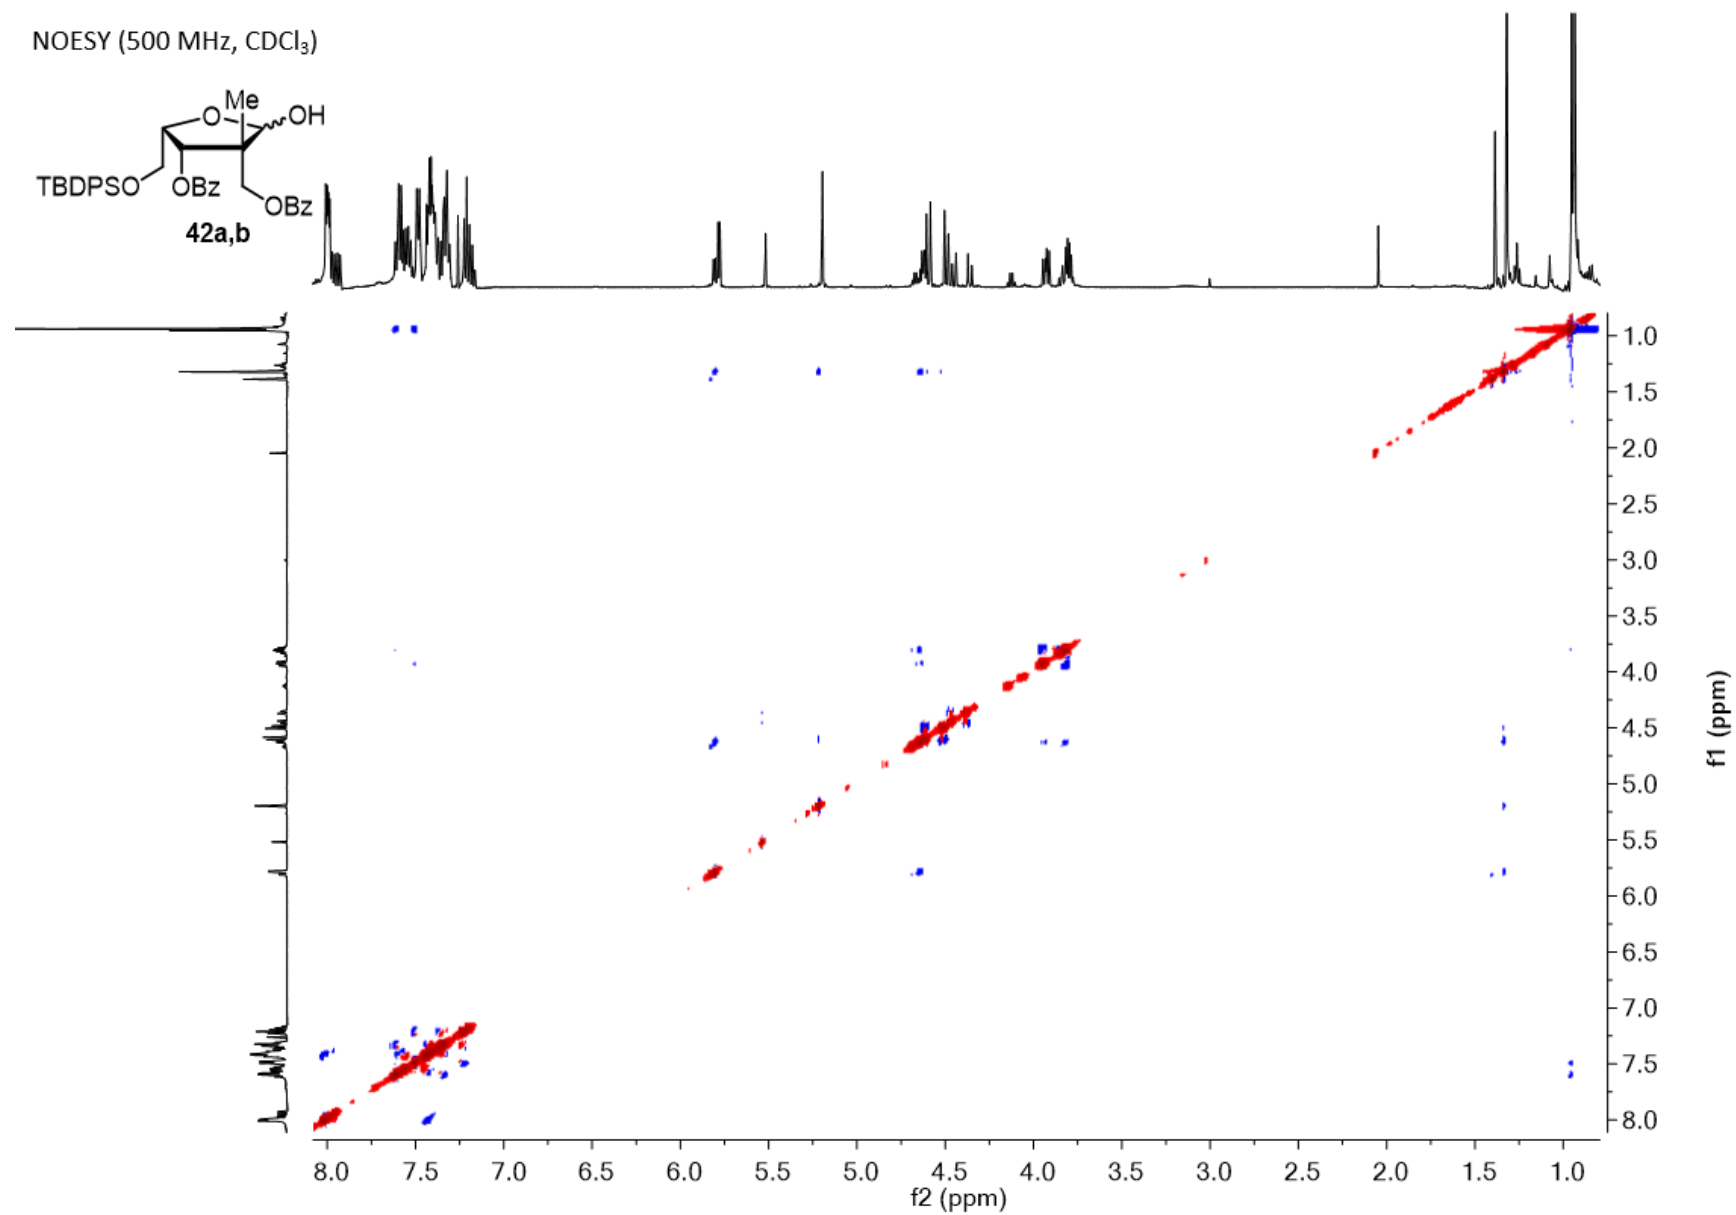

$^1\text{H}$ -NMR (500 MHz,  $\text{CDCl}_3$ )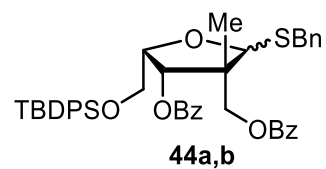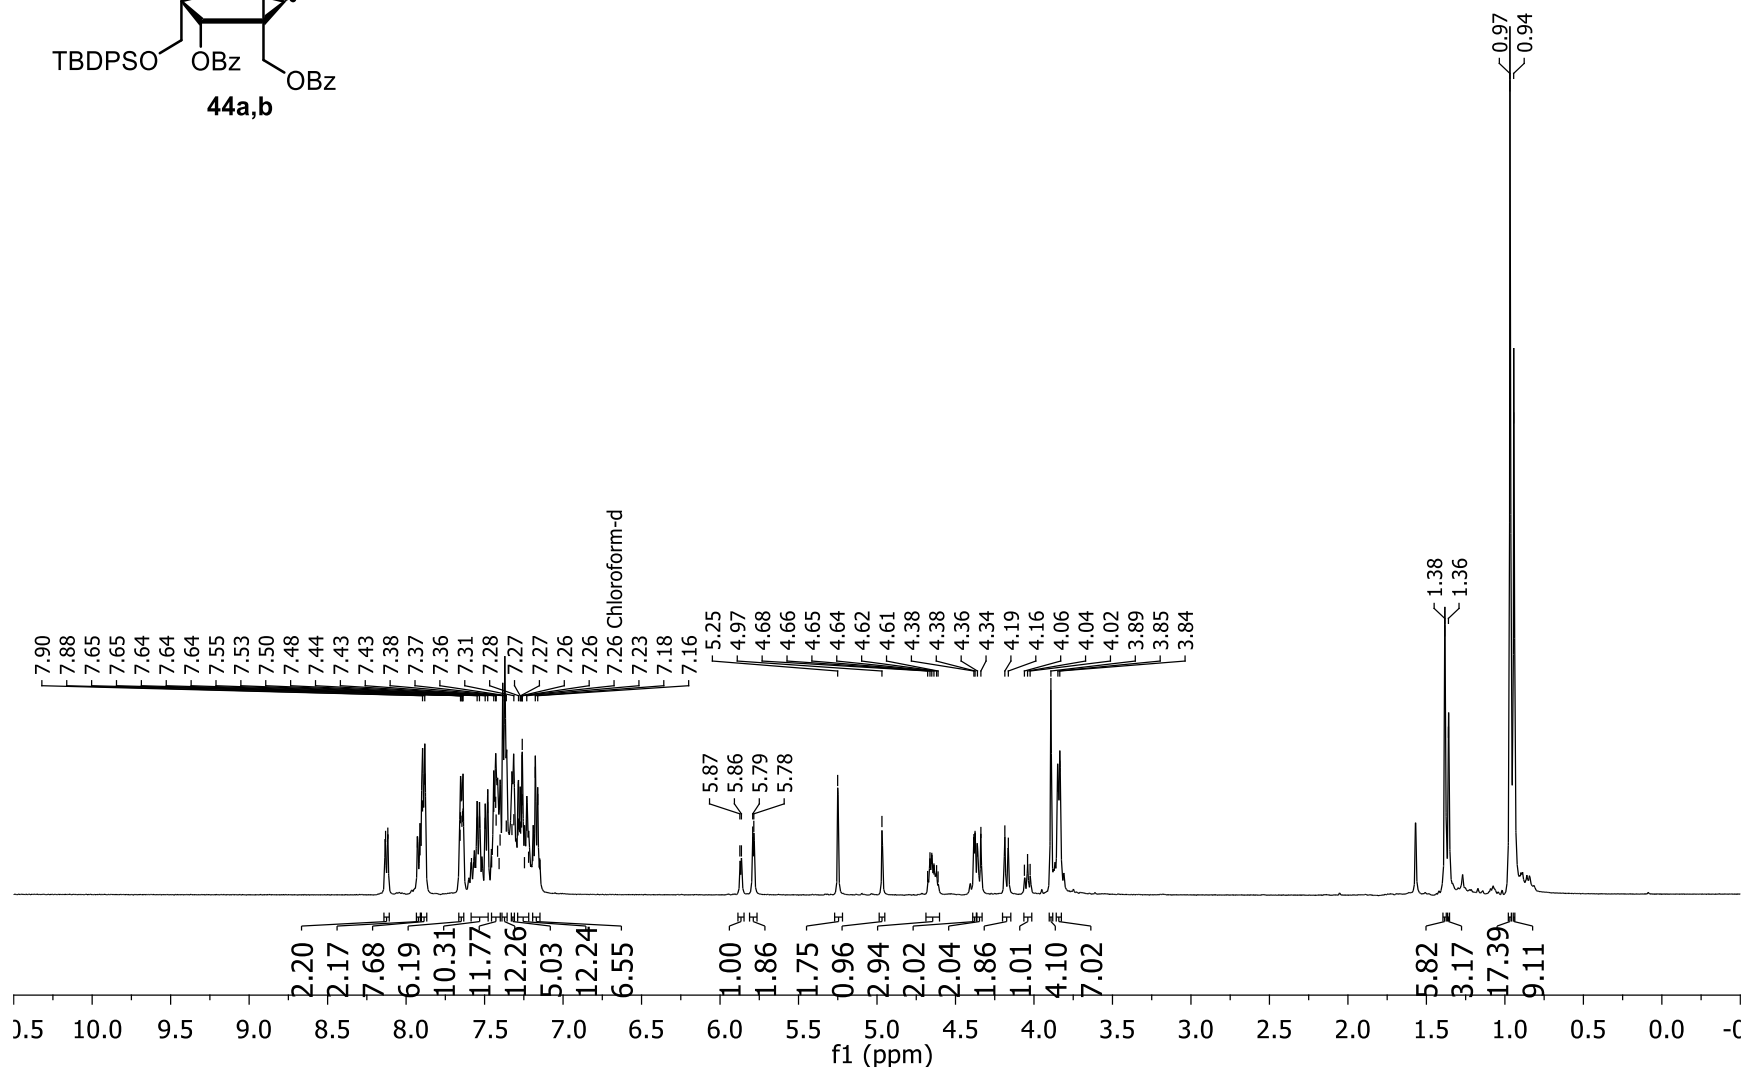

$^{13}\text{C}\{^1\text{H}\}$ -NMR (126 MHz,  $\text{CDCl}_3$ )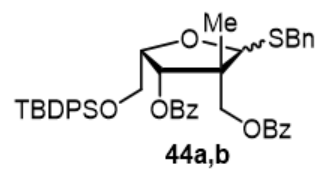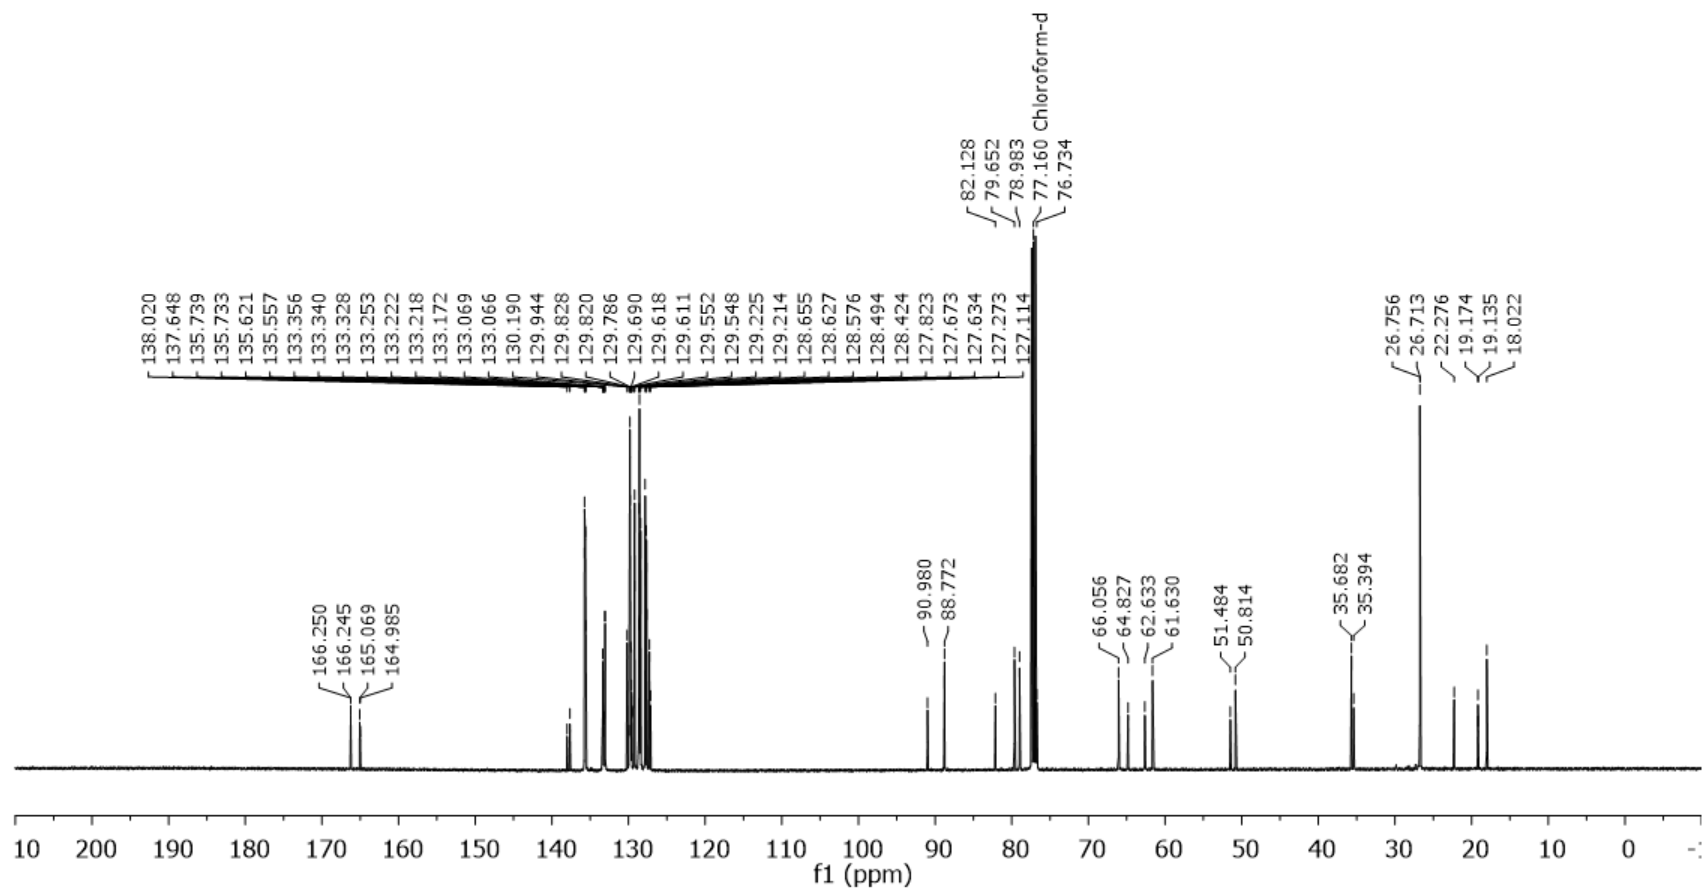

HSQC (500 MHz, CDCl<sub>3</sub>)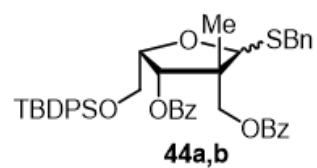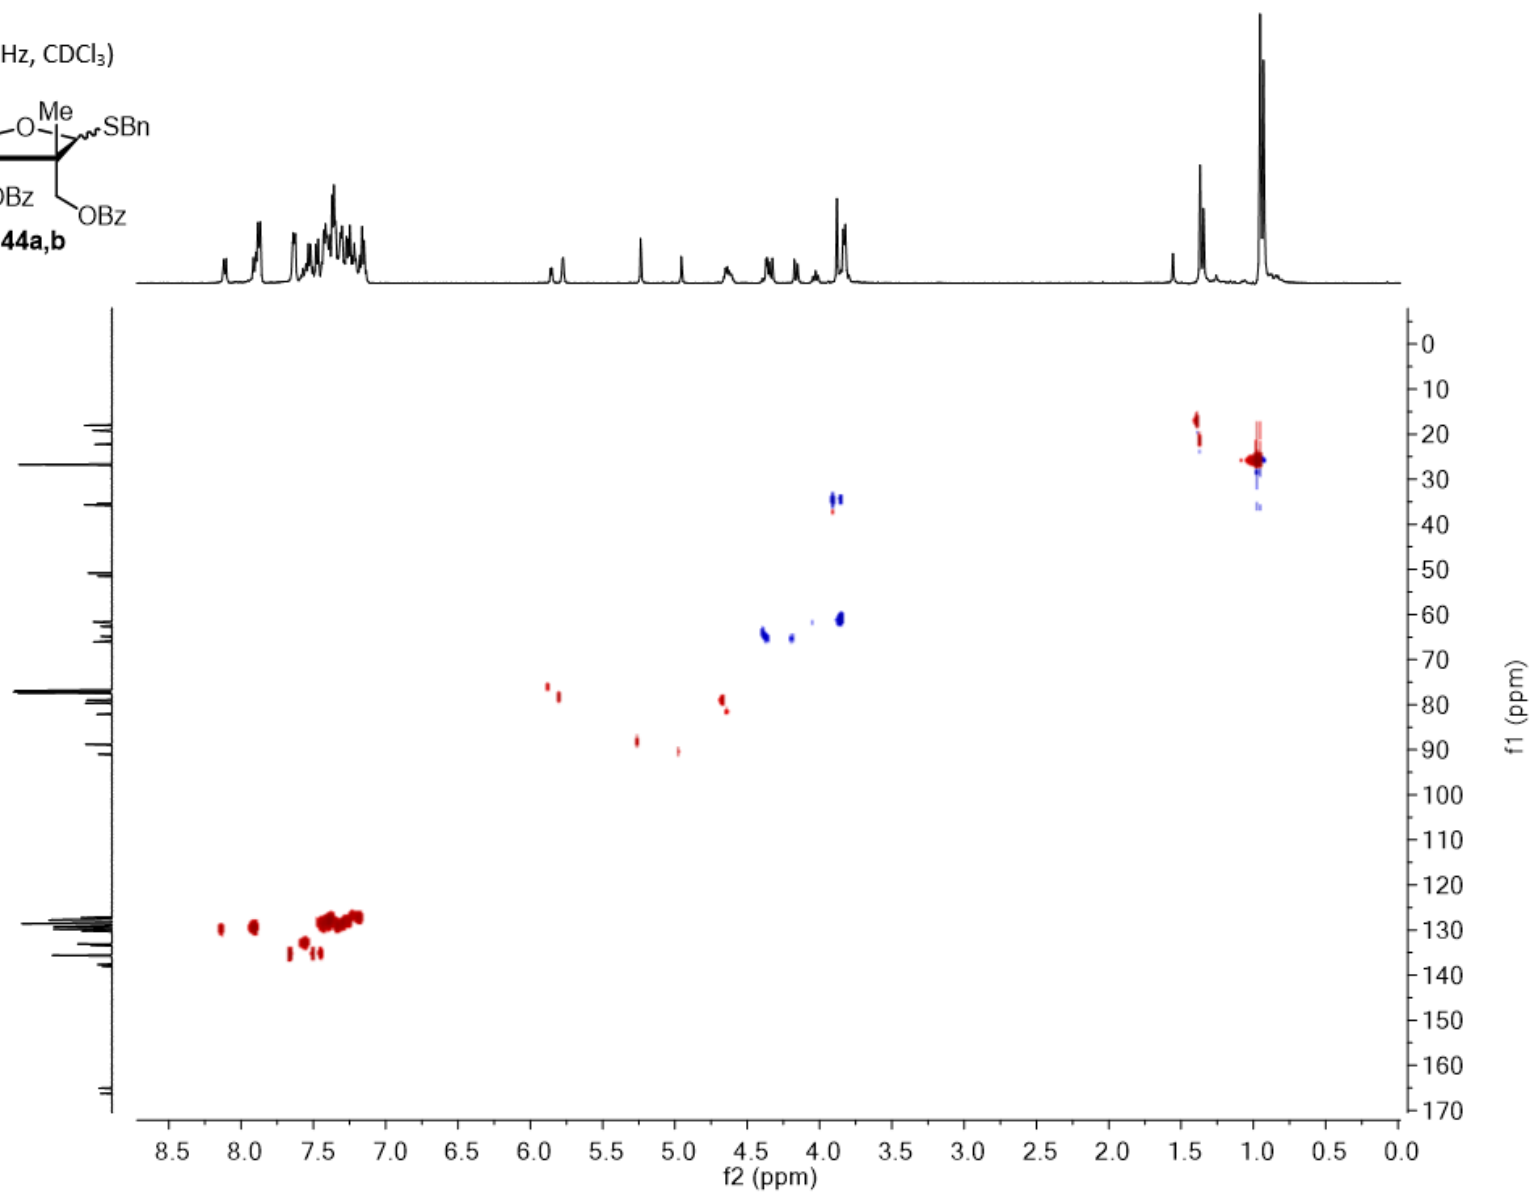



NOESY (500 MHz, CDCl<sub>3</sub>)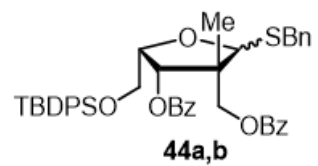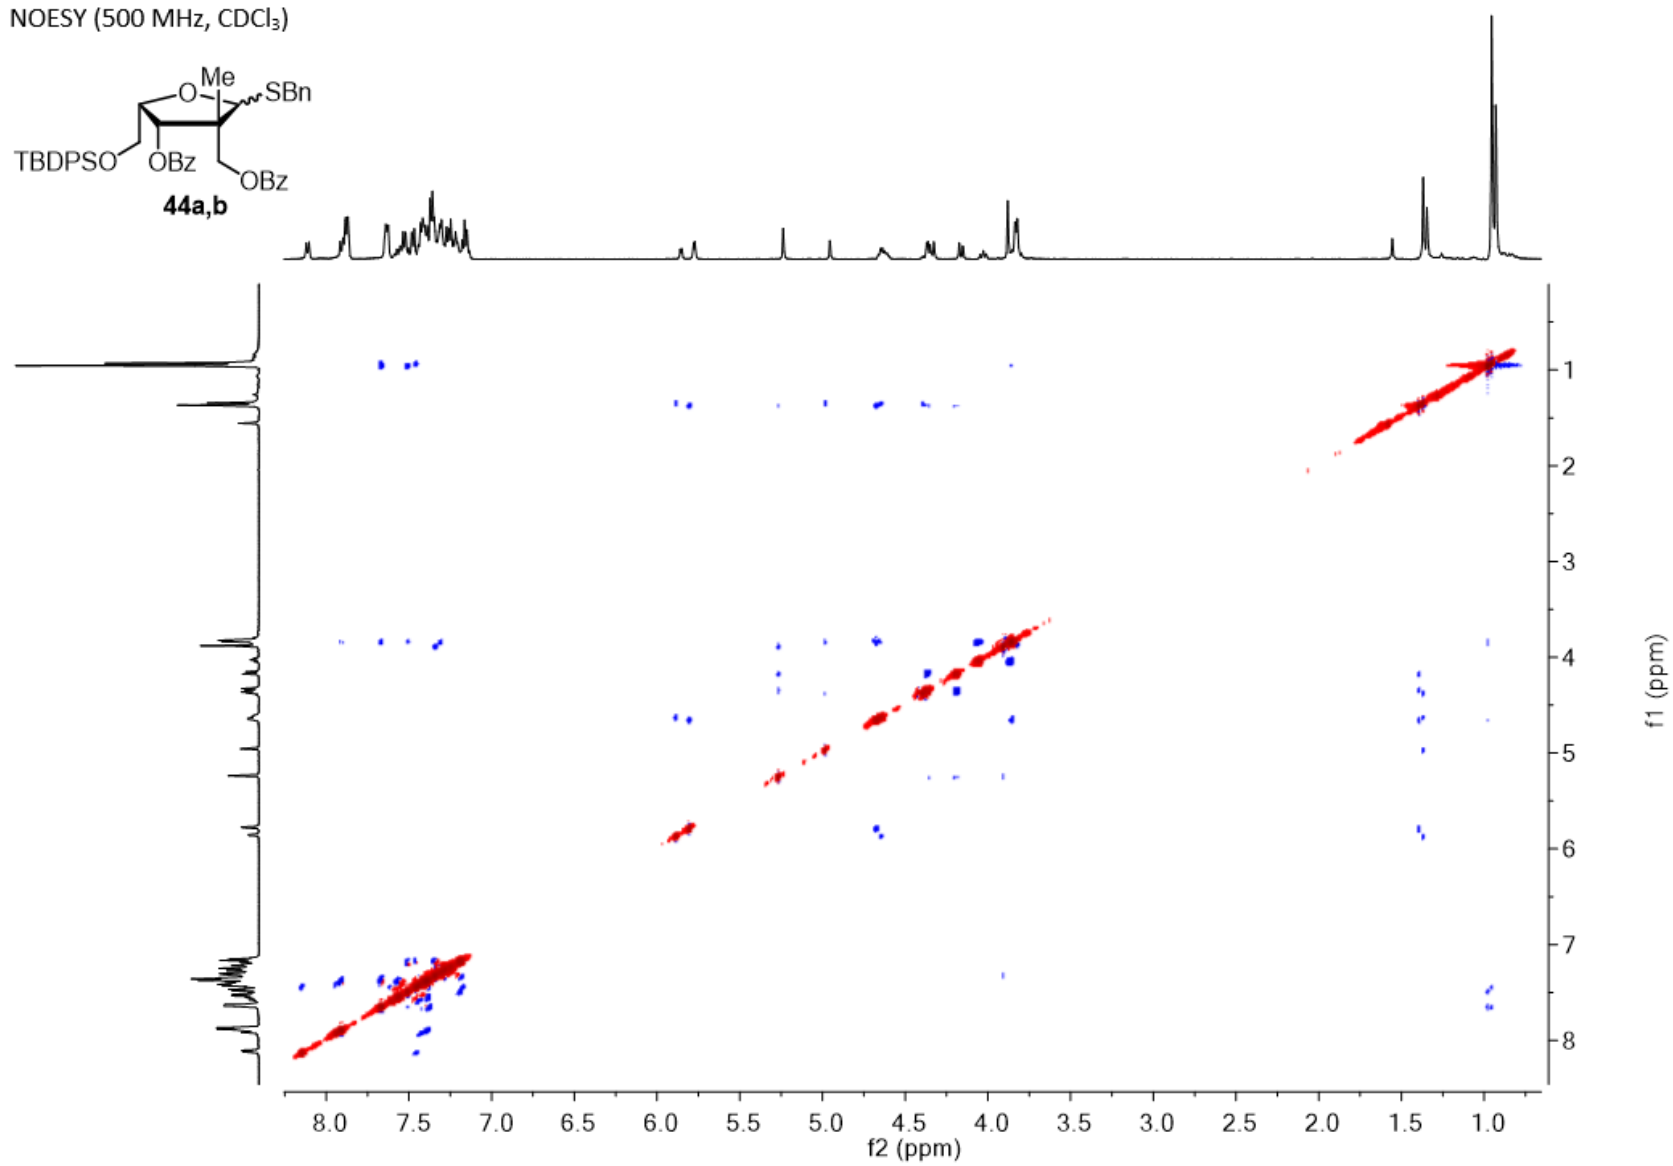

$^1\text{H}$ -NMR (500 MHz,  $\text{CDCl}_3$ )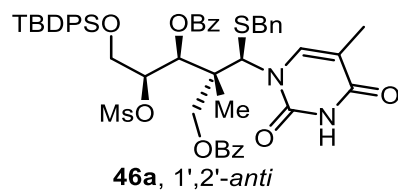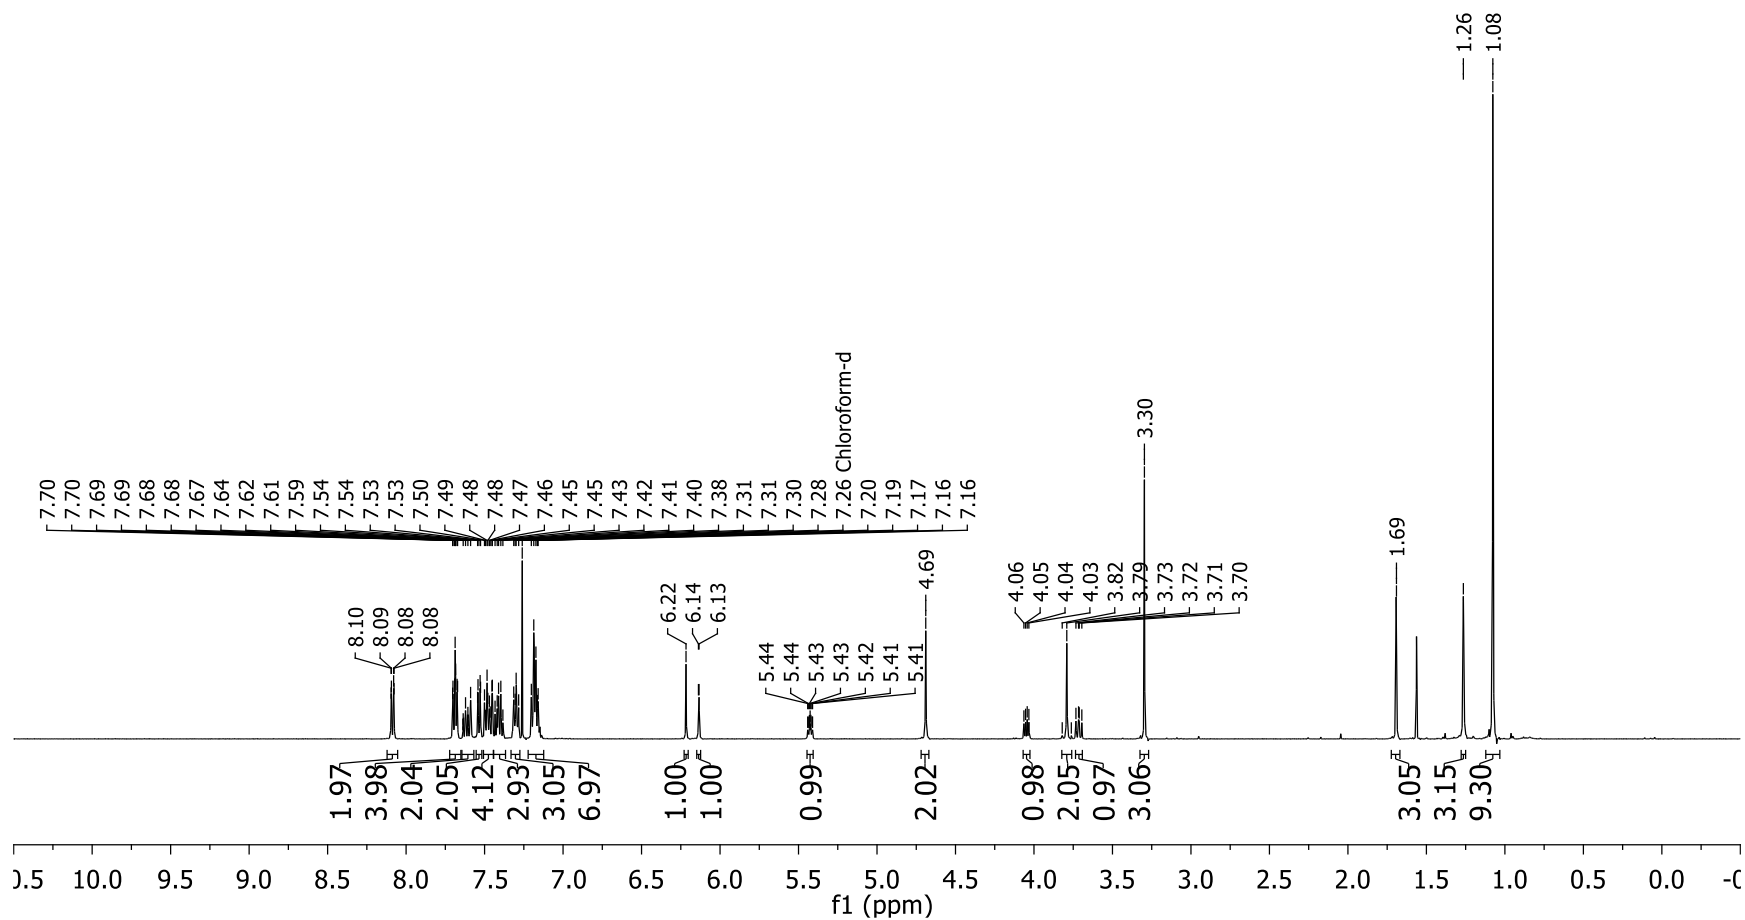

$^{13}\text{C}\{^1\text{H}\}$ -NMR (126 MHz,  $\text{CDCl}_3$ )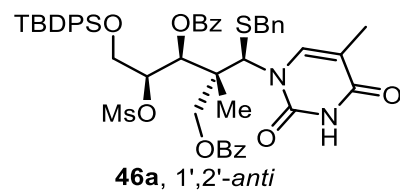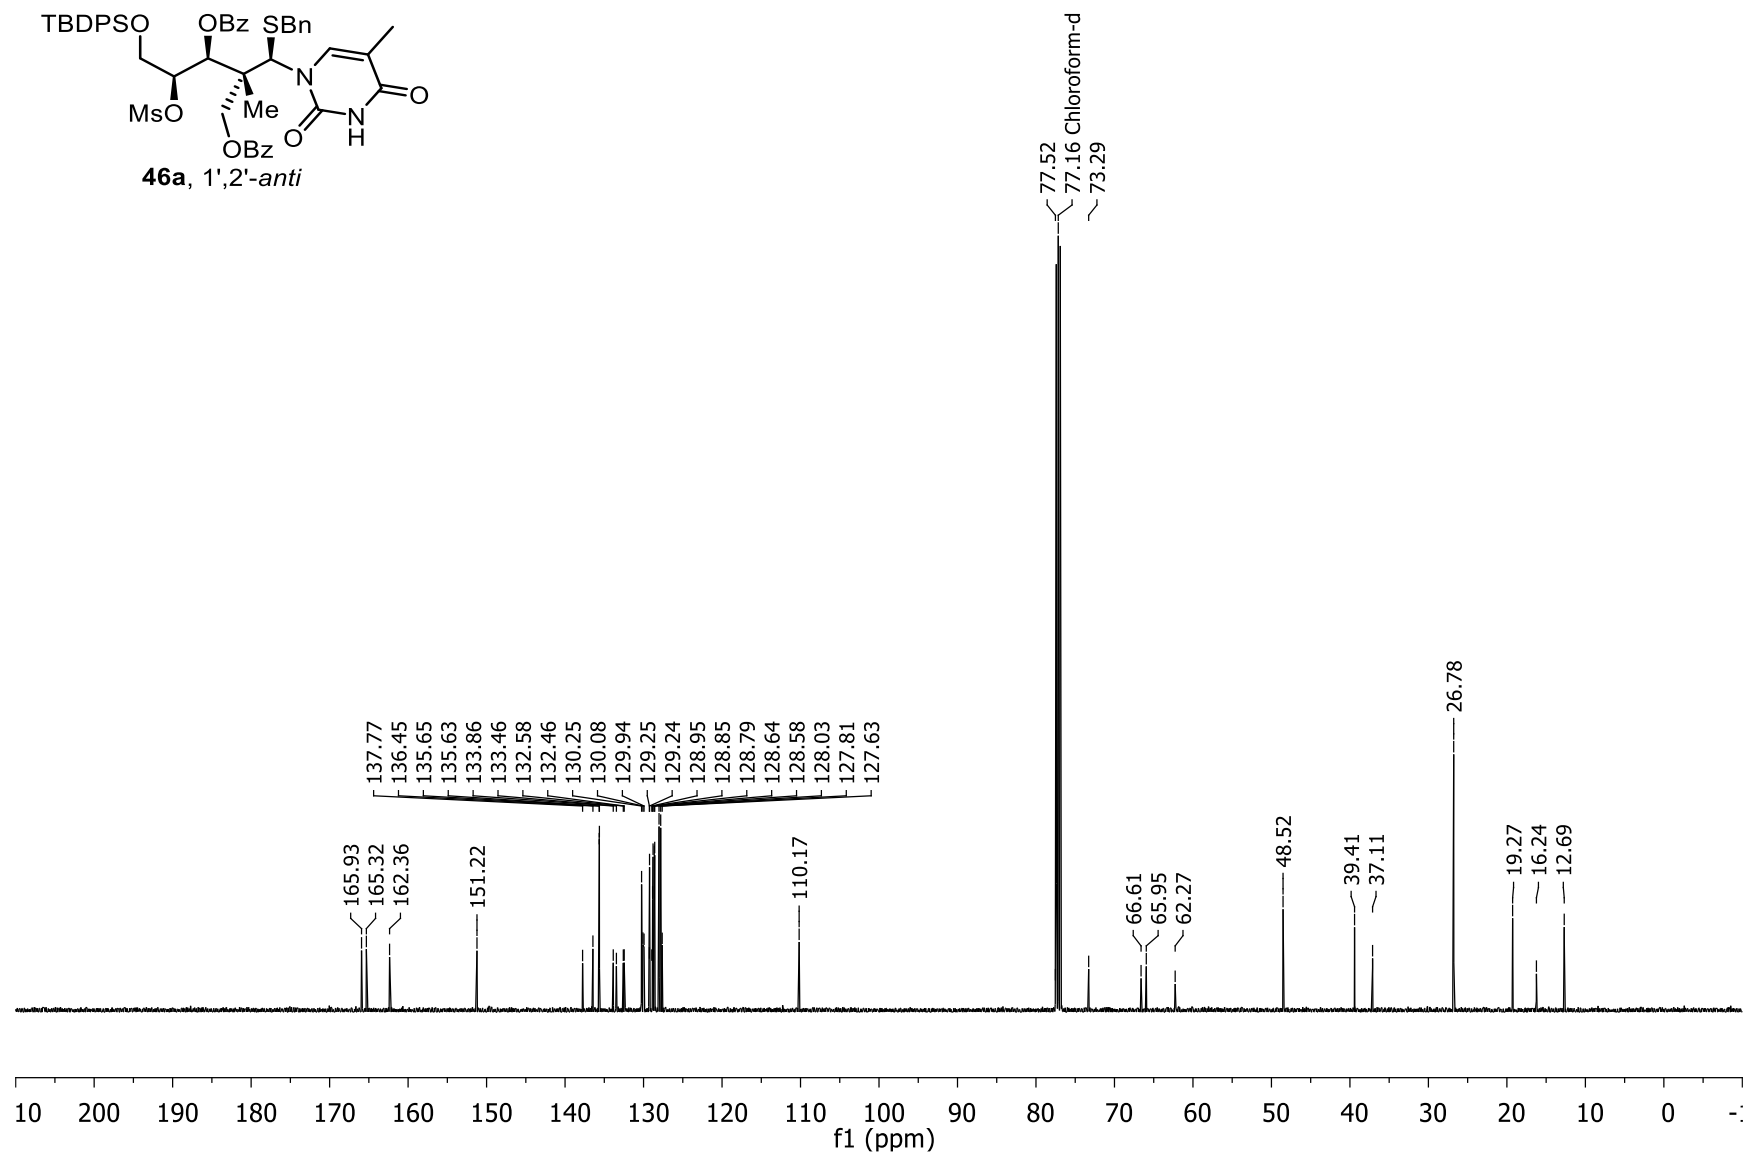

<sup>1</sup>H-NMR (500 MHz, CDCl<sub>3</sub>)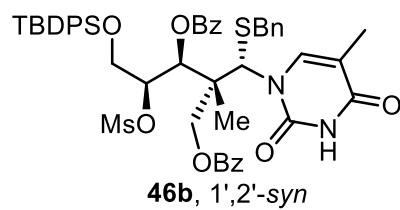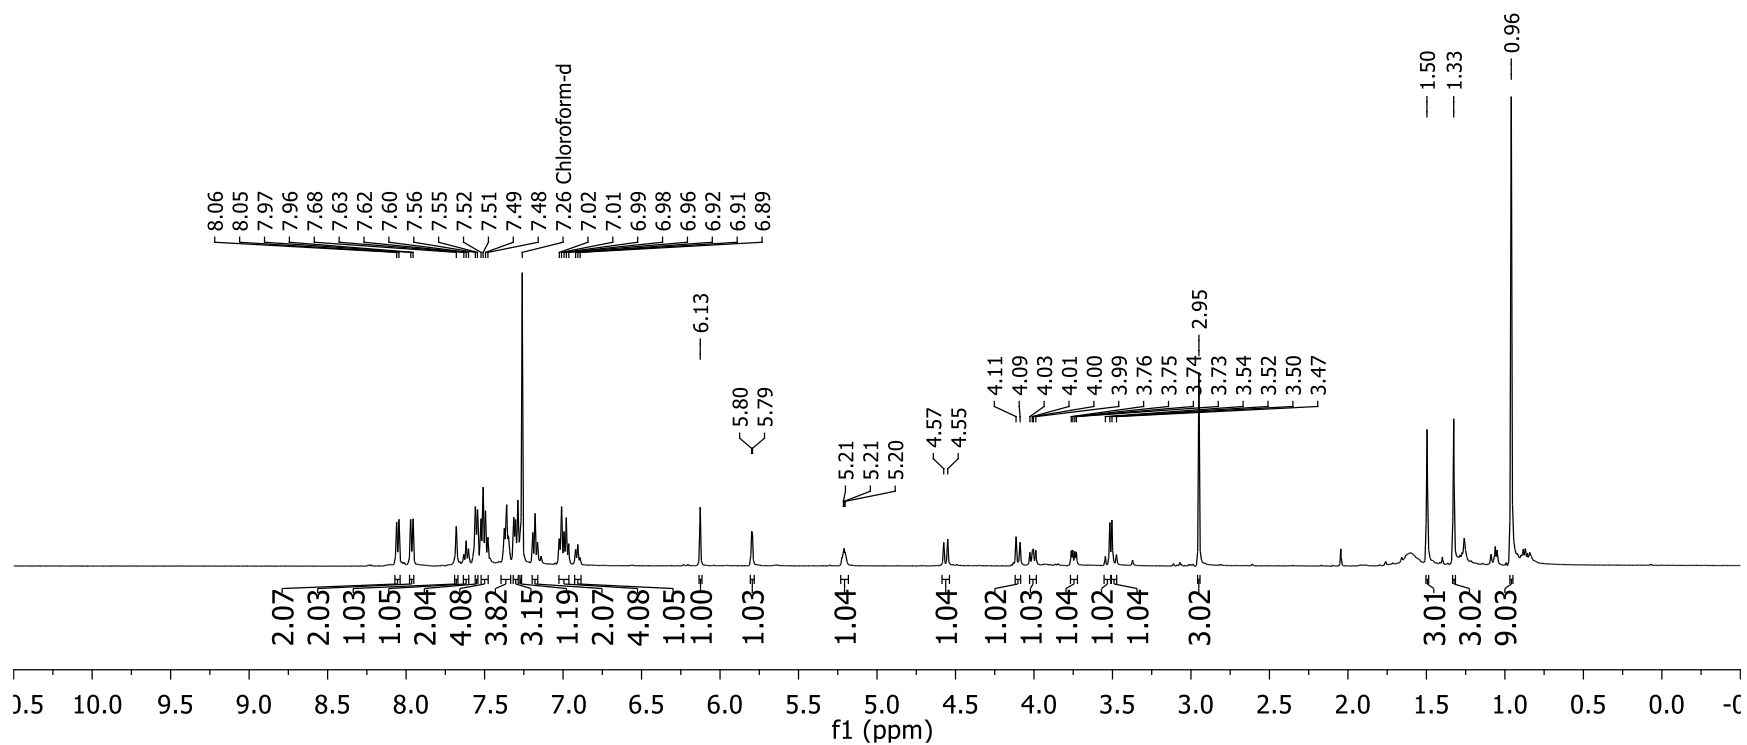

$^{13}\text{C}\{^1\text{H}\}$ -NMR (126 MHz,  $\text{CDCl}_3$ )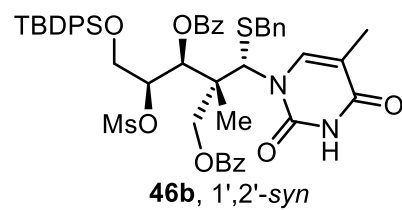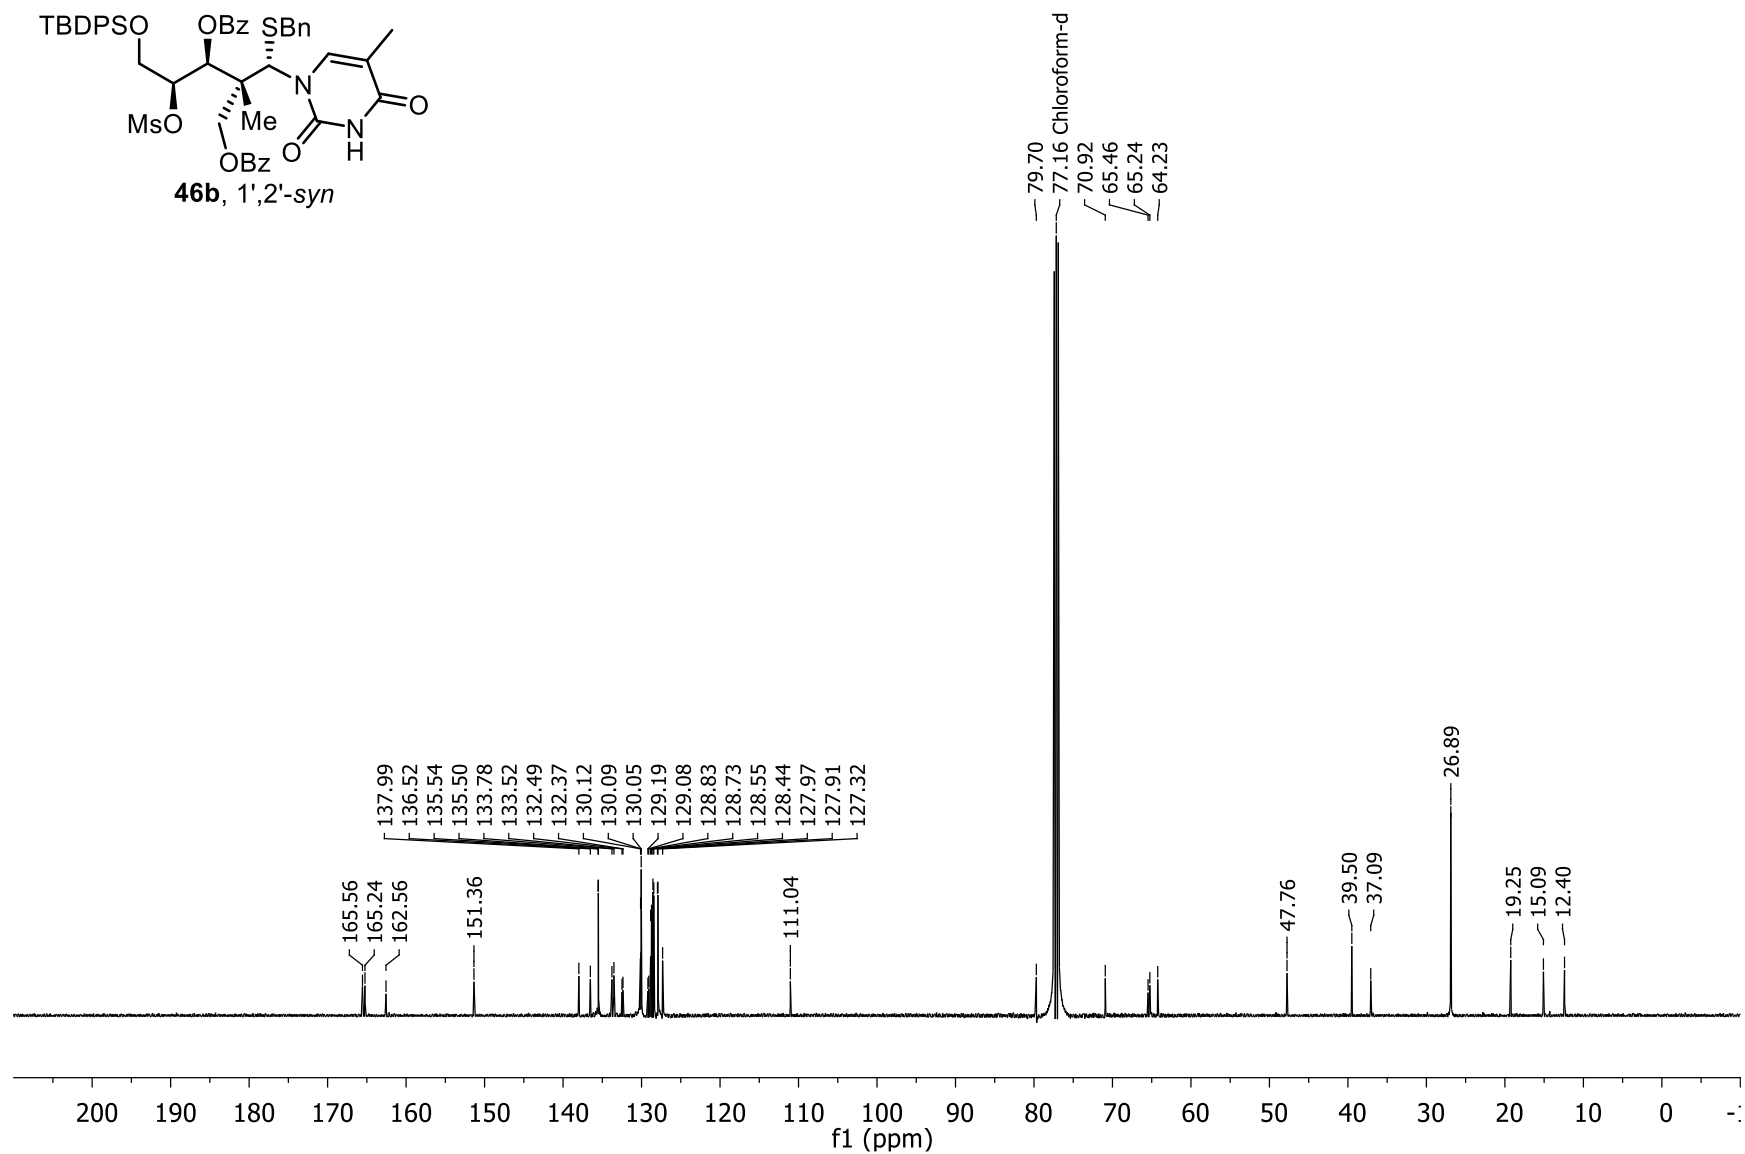

<sup>1</sup>H-NMR (500 MHz, CDCl<sub>3</sub>)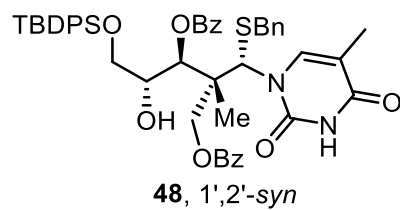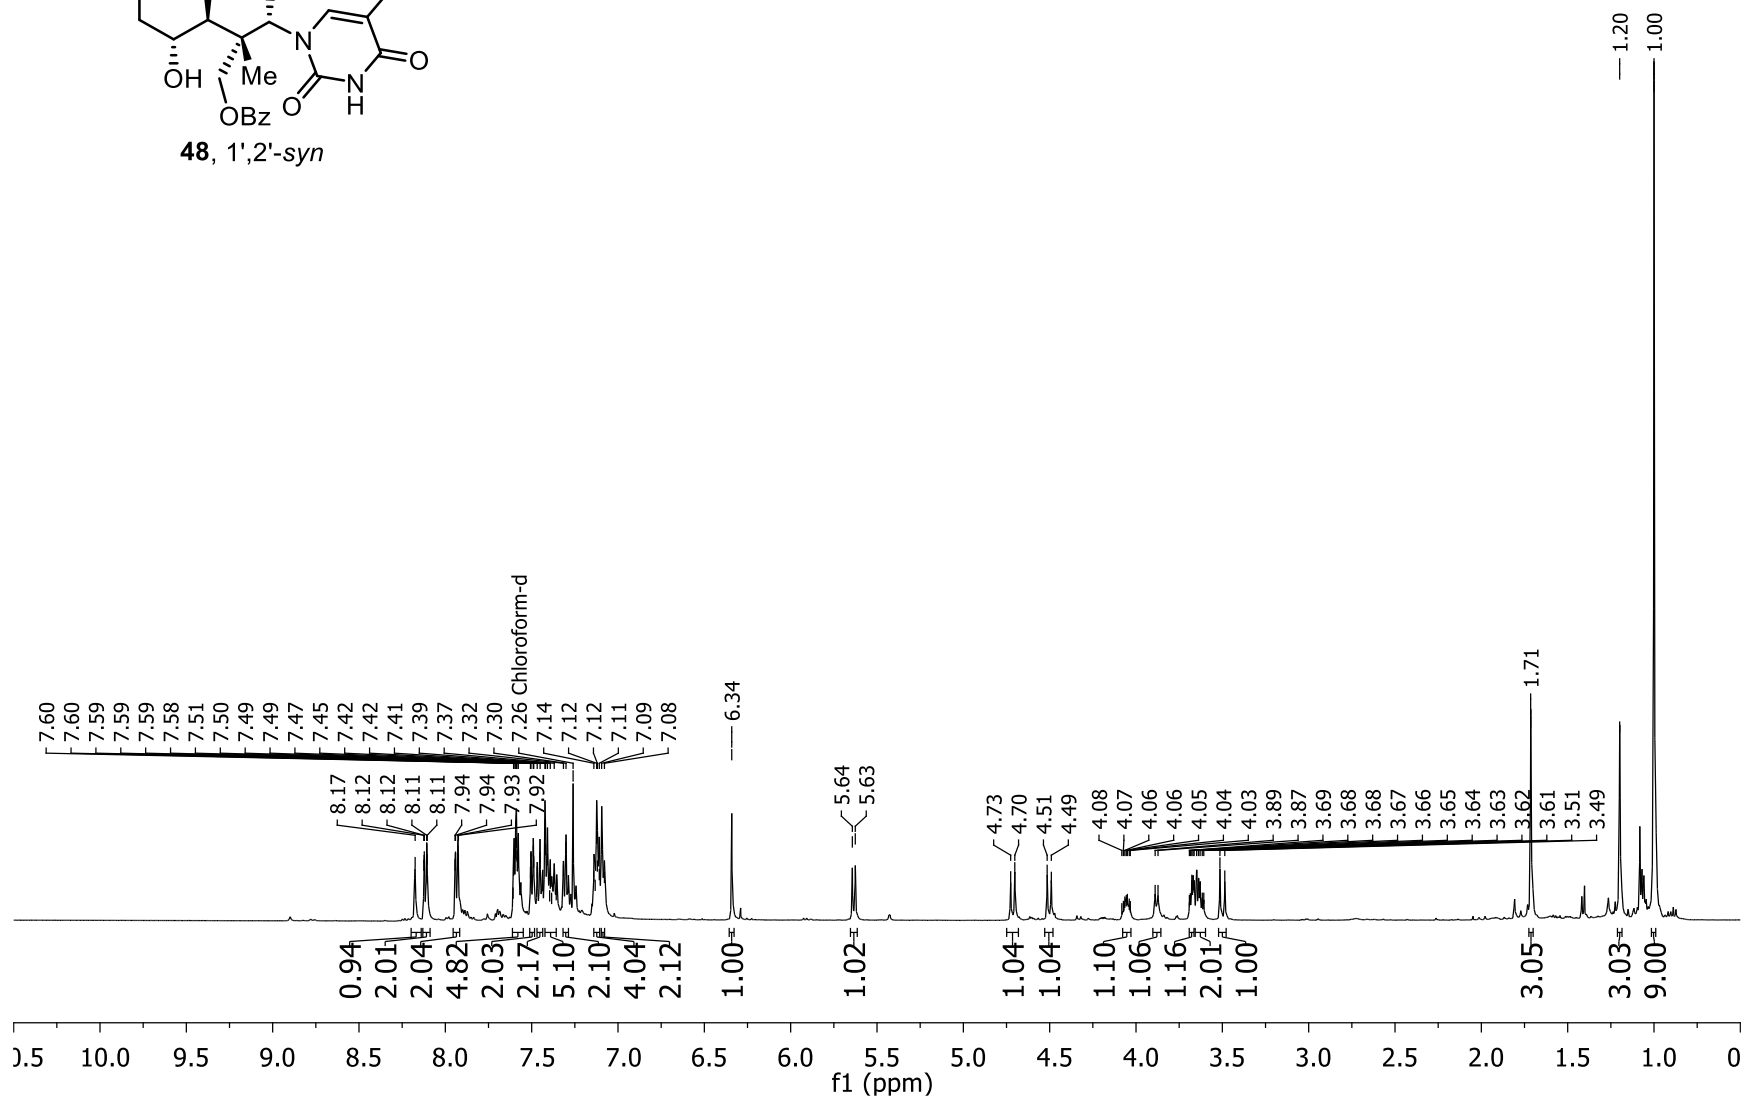

**48**, 1',2'-*syn*

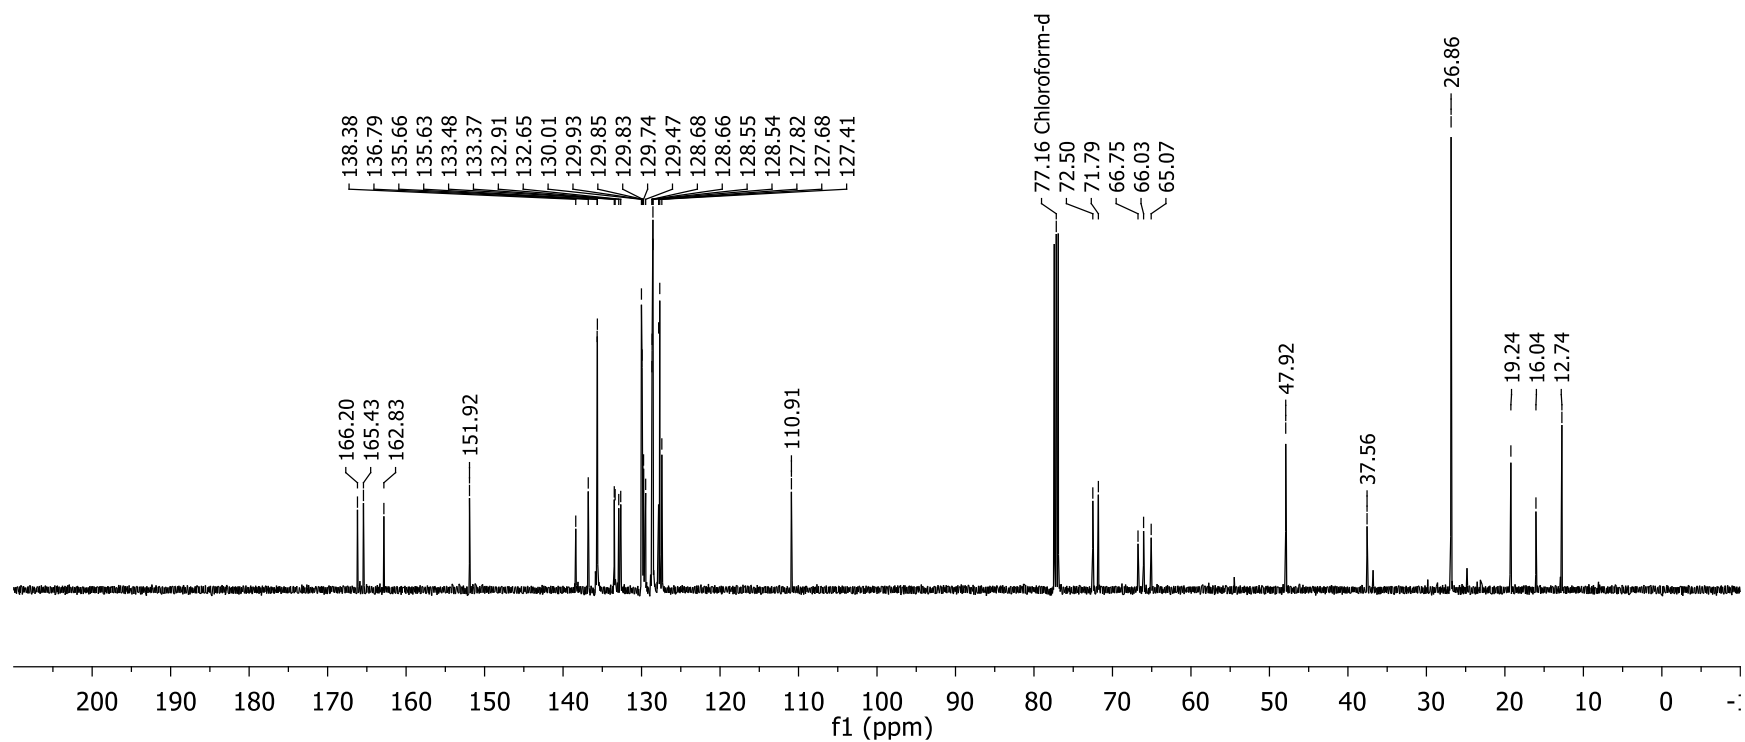

**49**

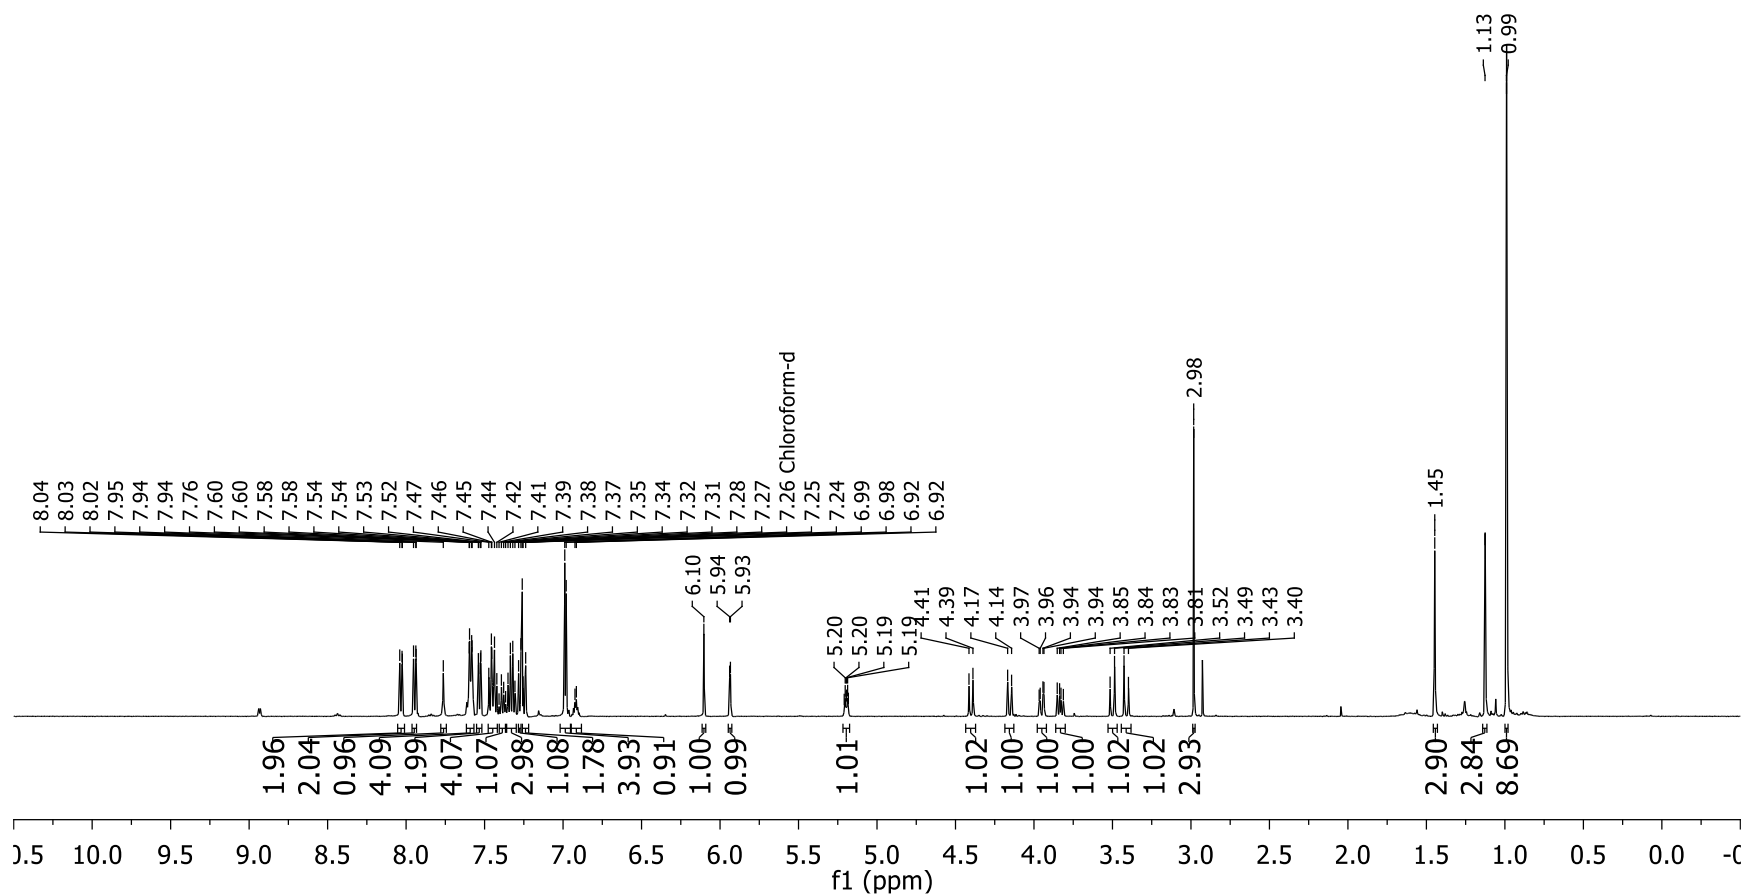



**49**

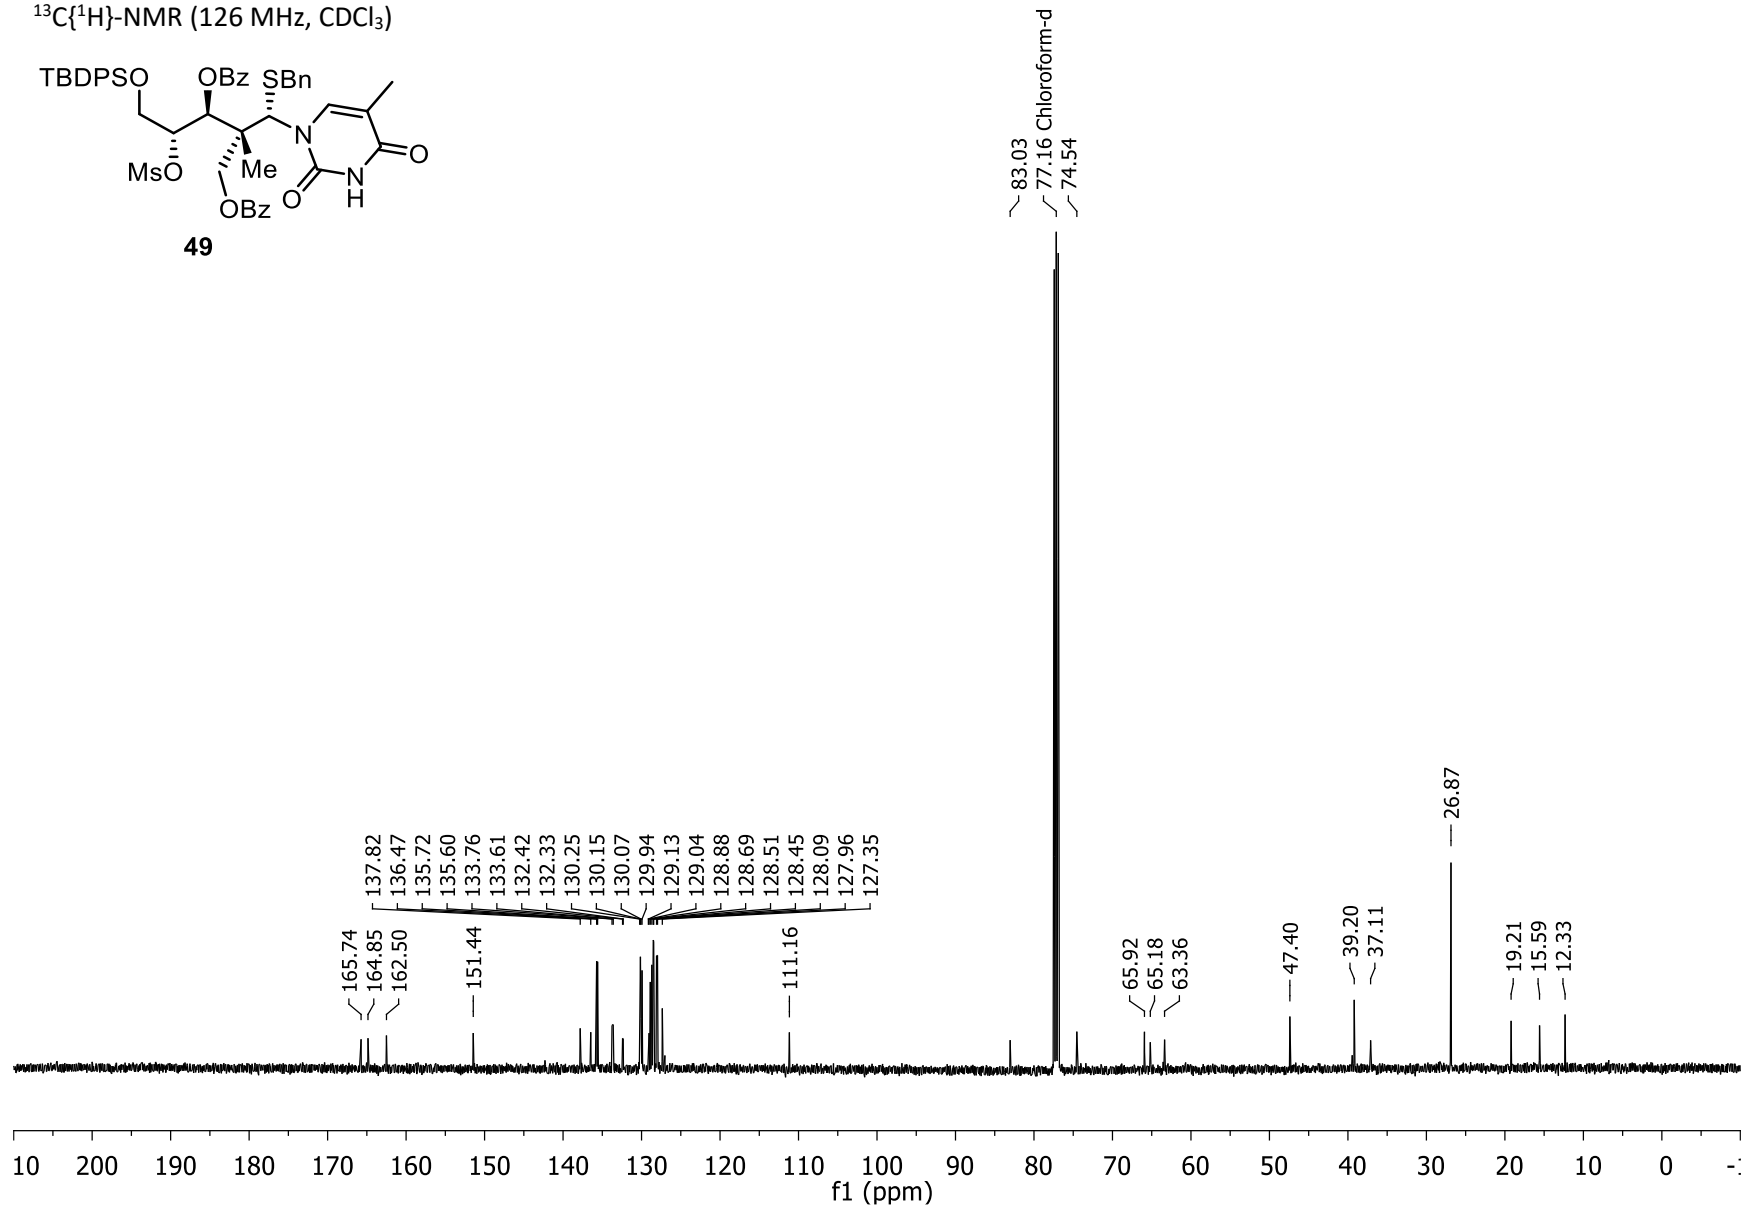

$^1\text{H}$ -NMR (500 MHz,  $\text{CDCl}_3$ )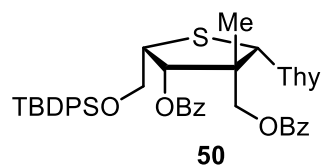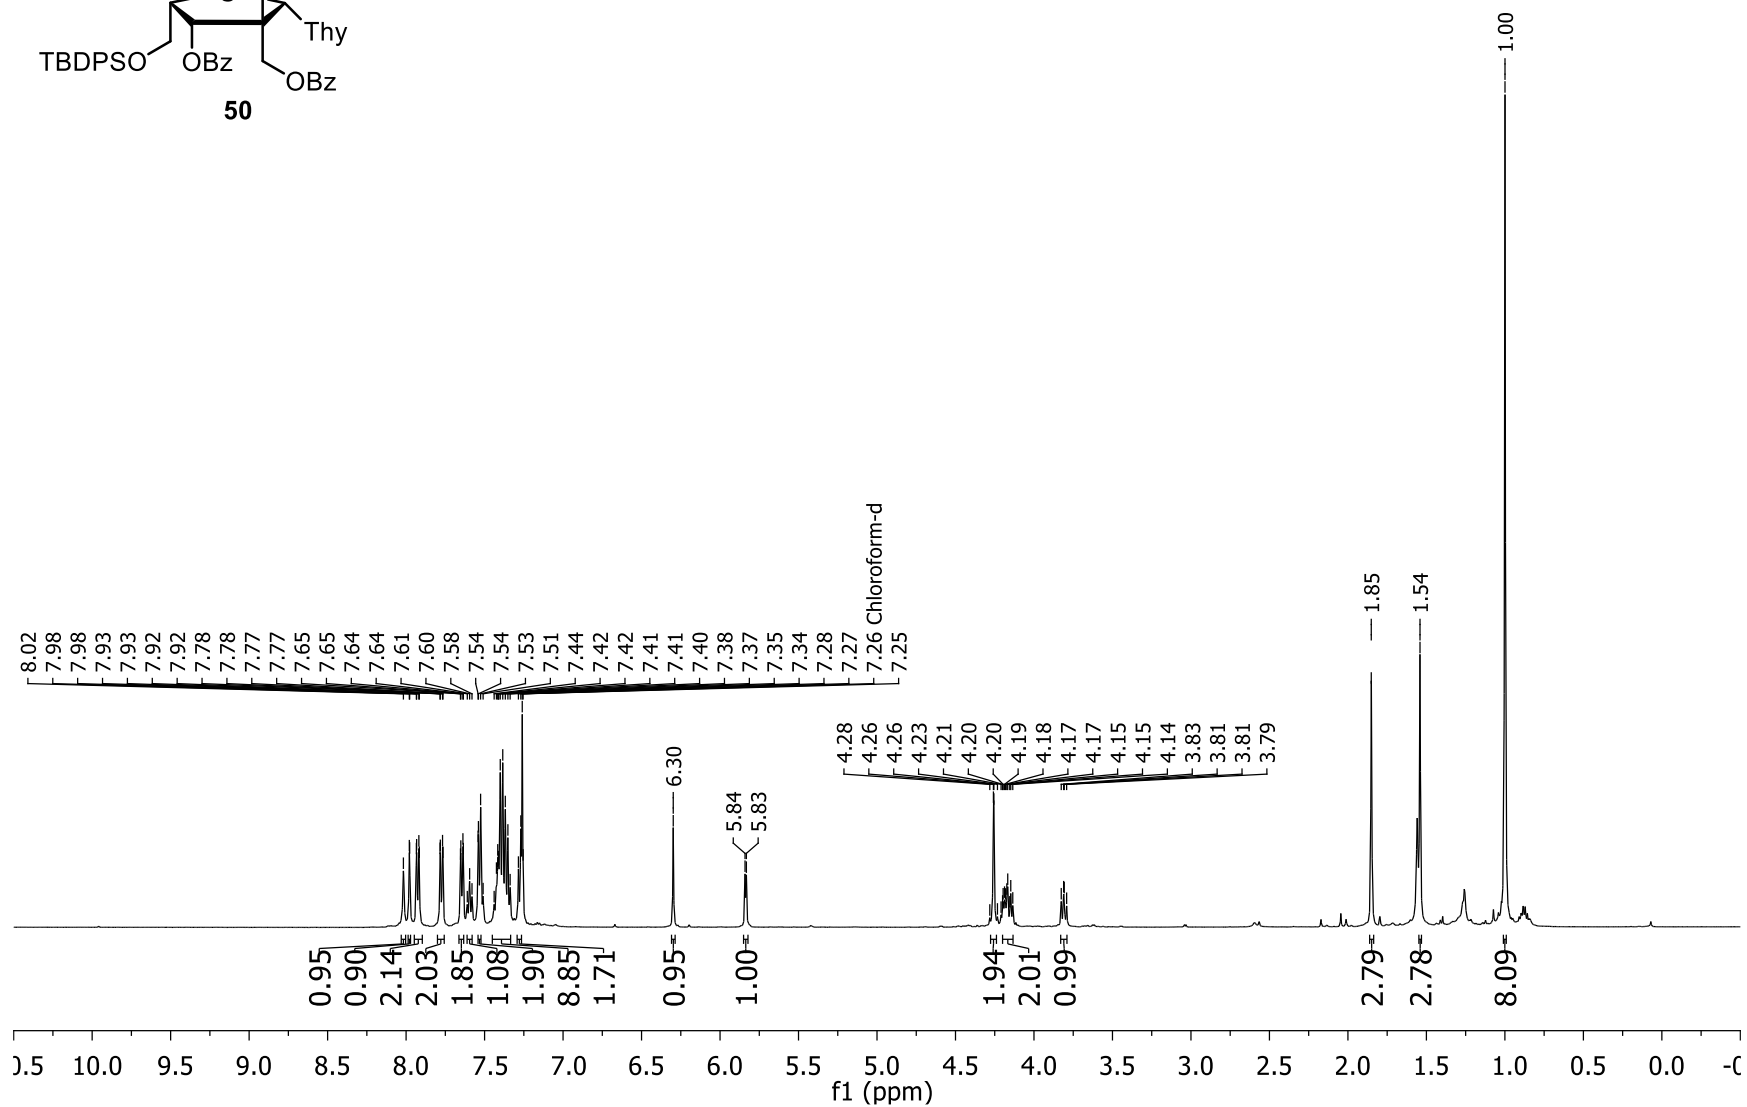

$^{13}\text{C}\{^1\text{H}\}$ -NMR (126 MHz,  $\text{CDCl}_3$ )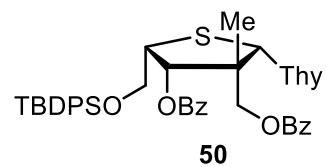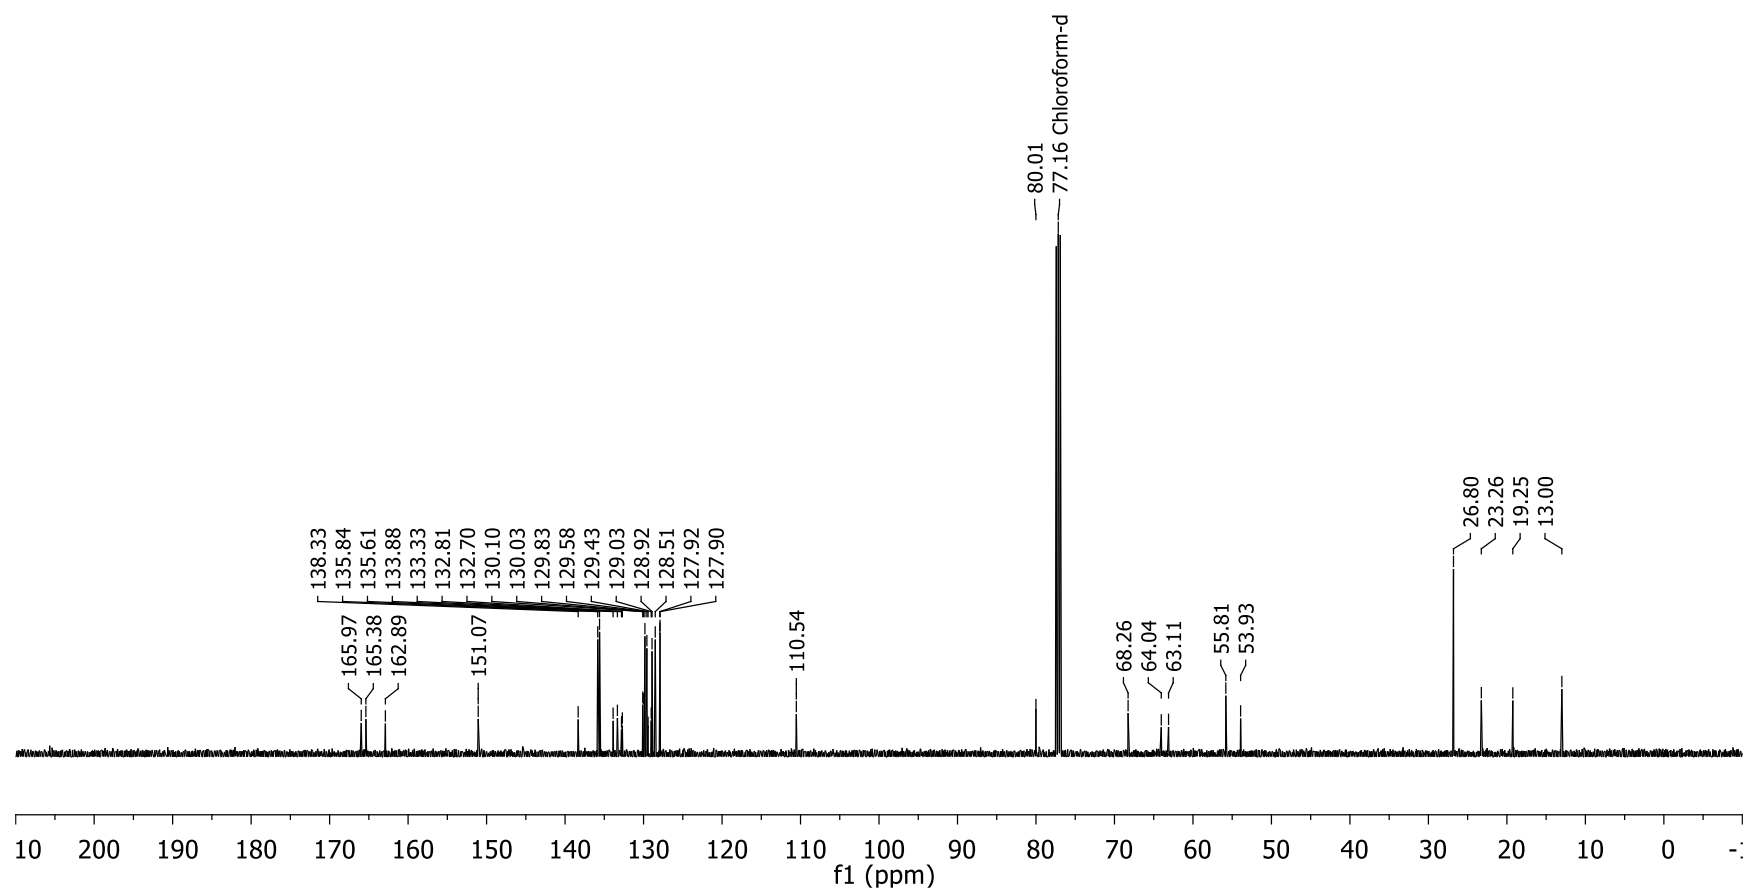

COSY (500 MHz, CDCl<sub>3</sub>)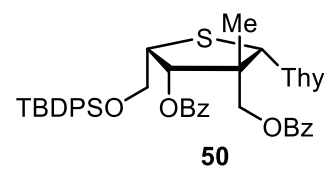**50**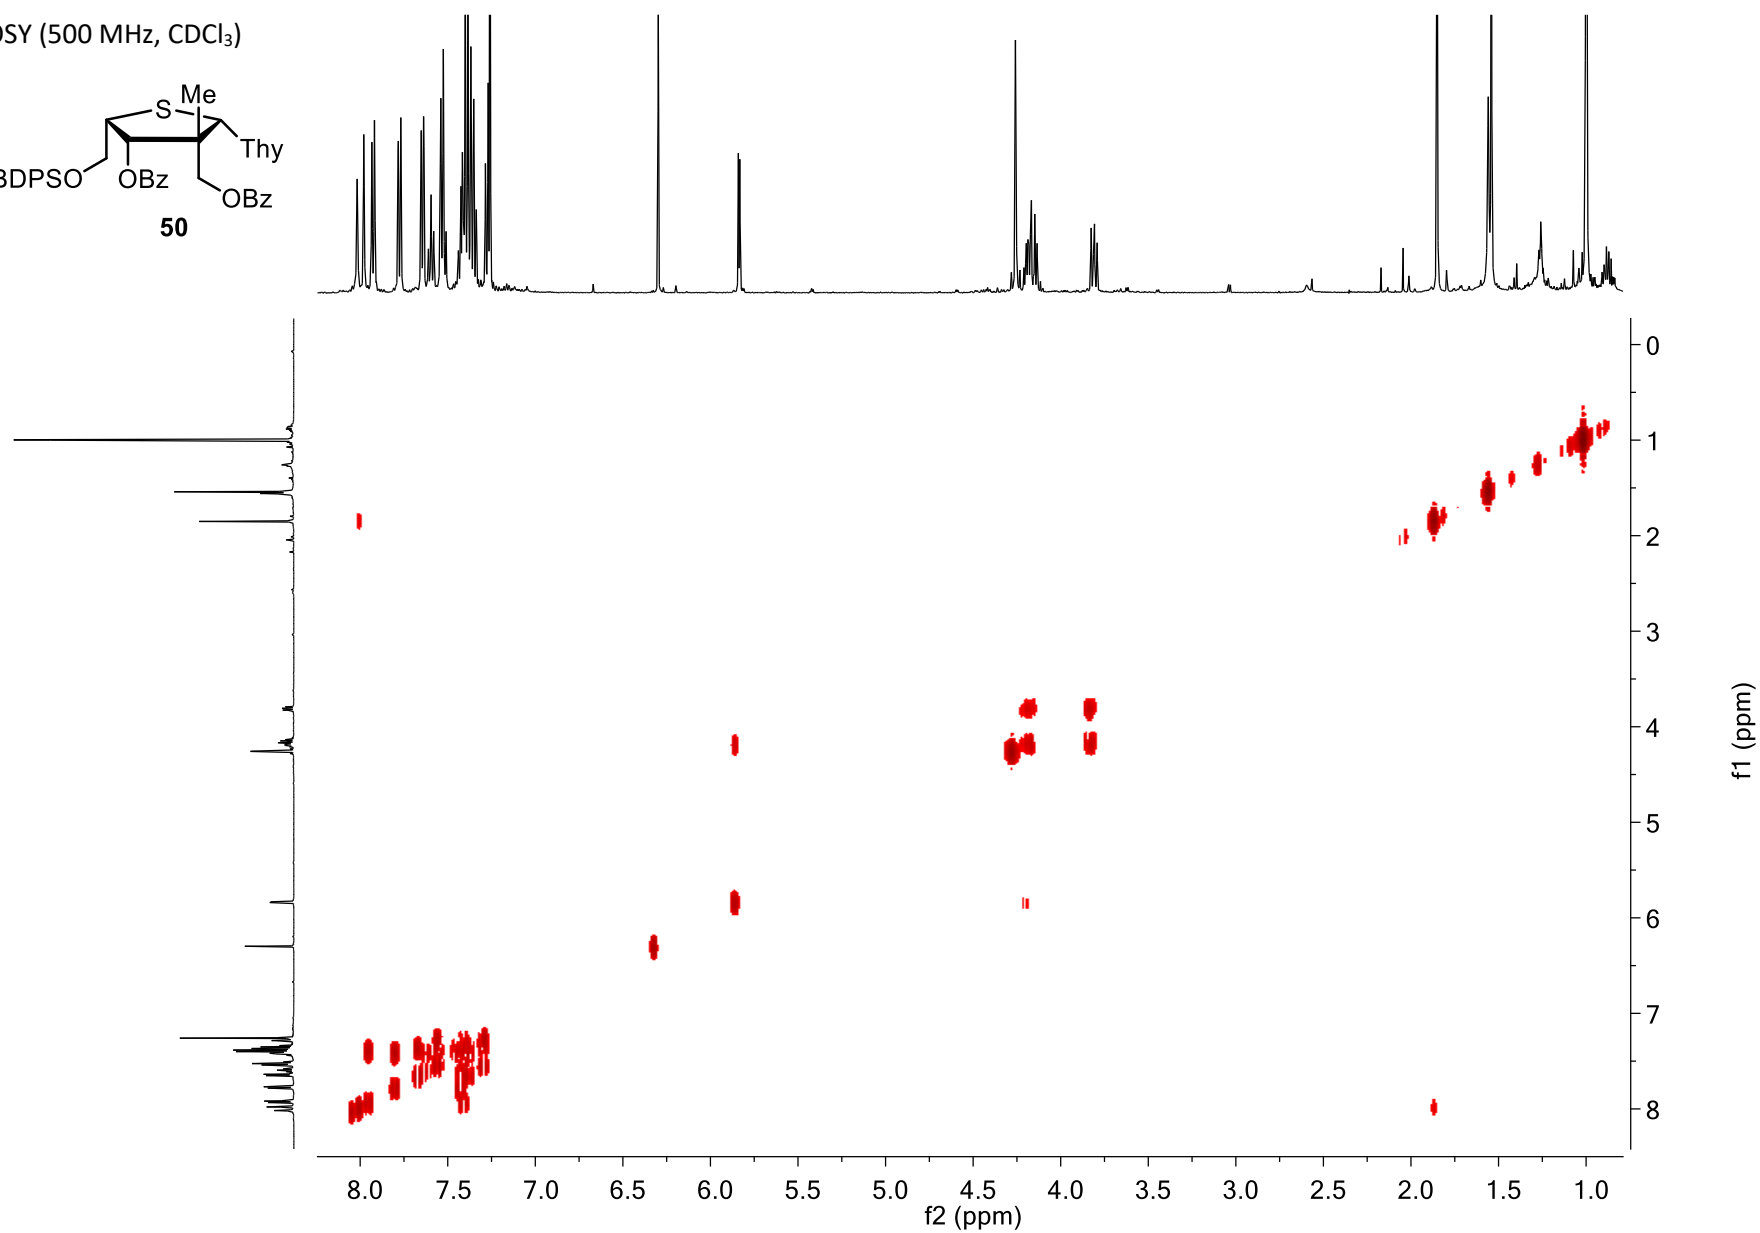

HSQC (500 MHz, CDCl<sub>3</sub>)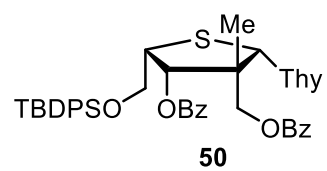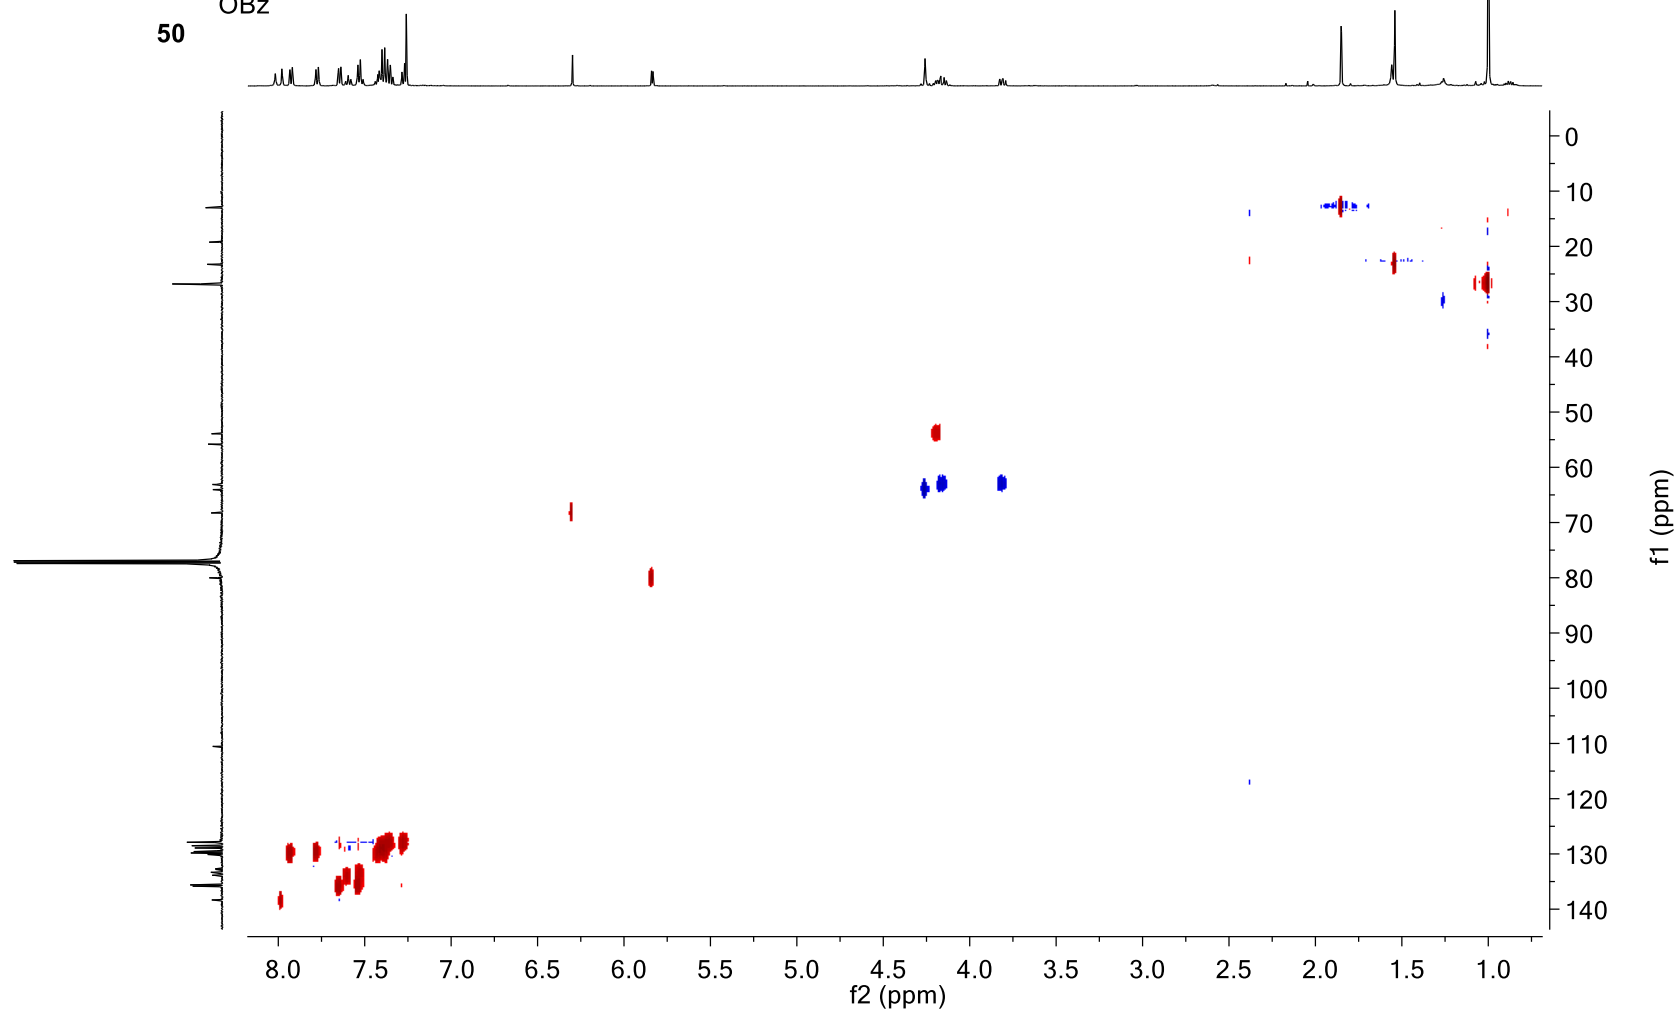

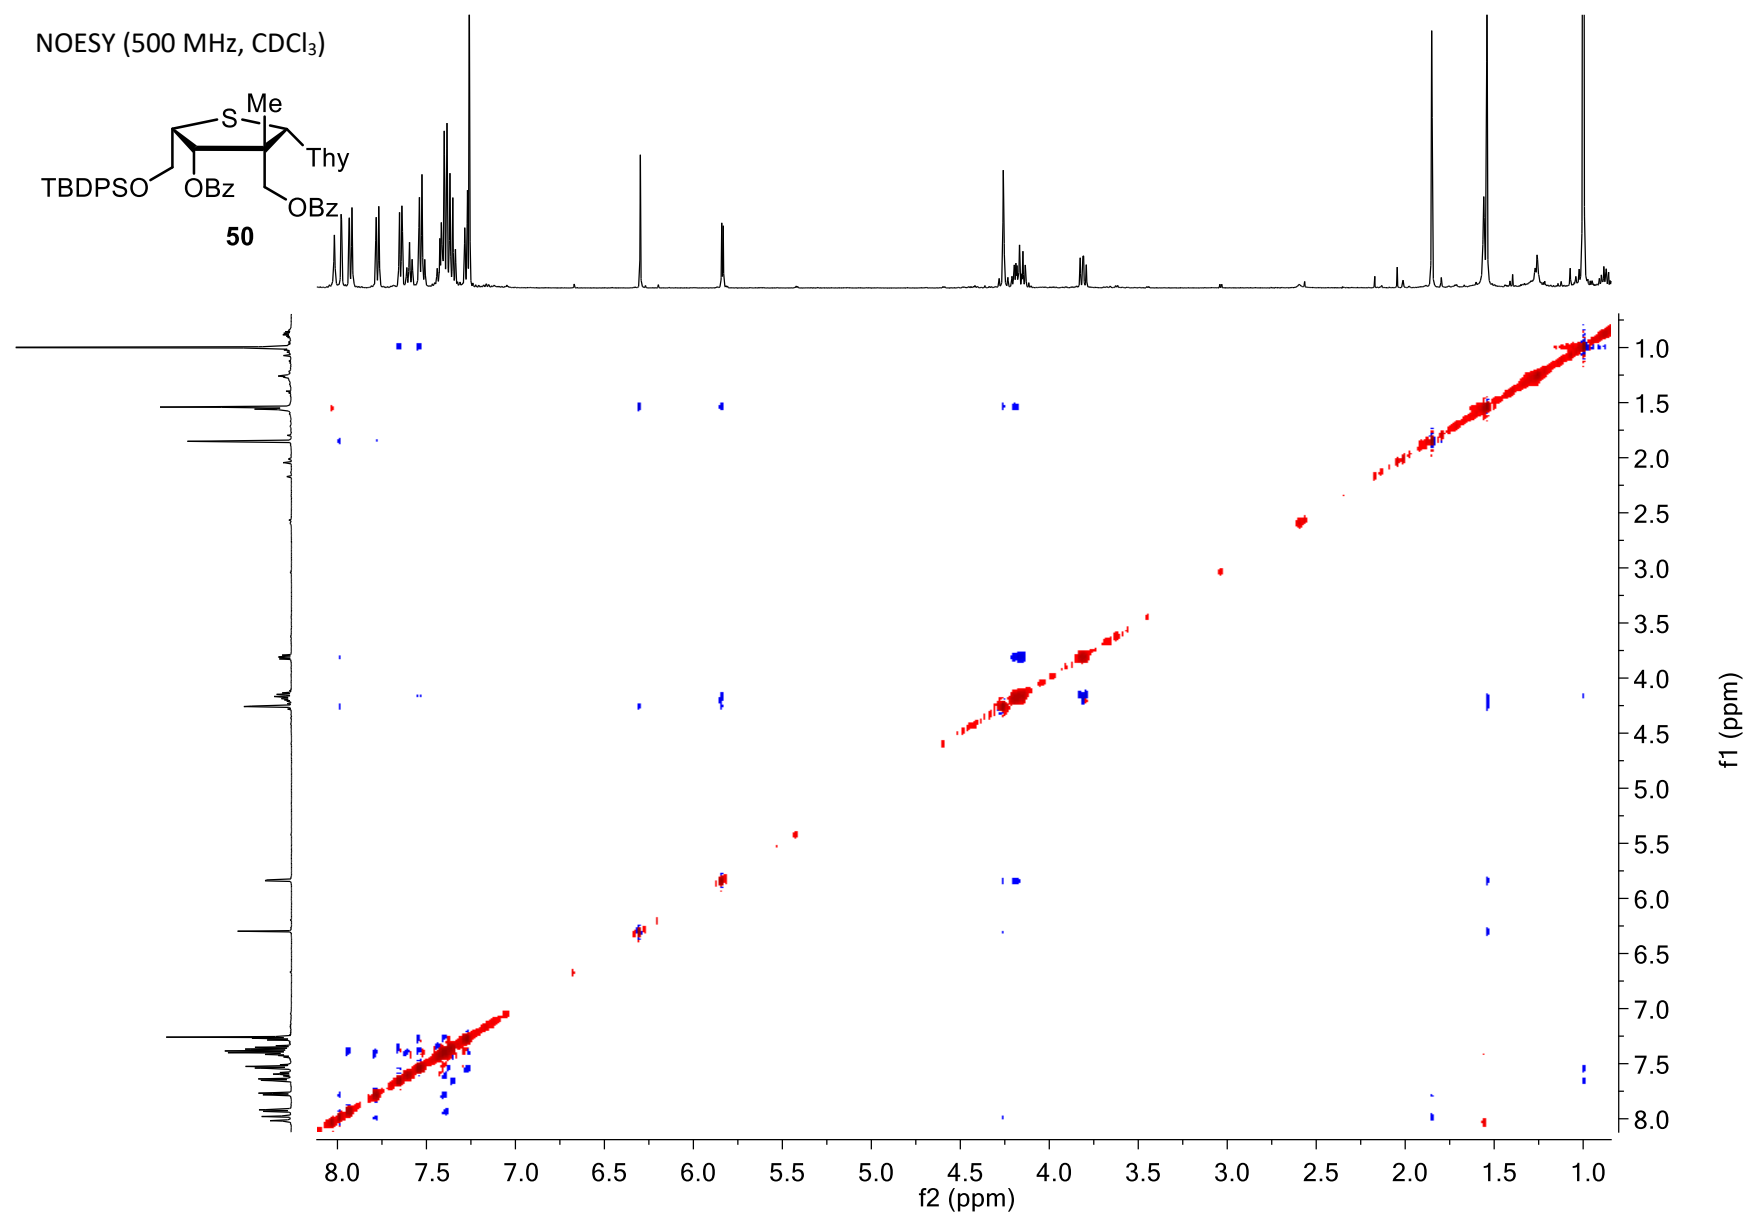

$^1\text{H}$ -NMR (500 MHz,  $\text{CDCl}_3$ )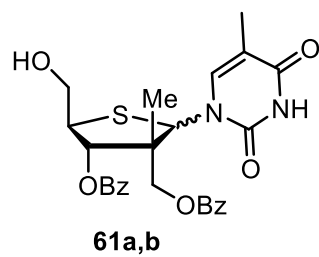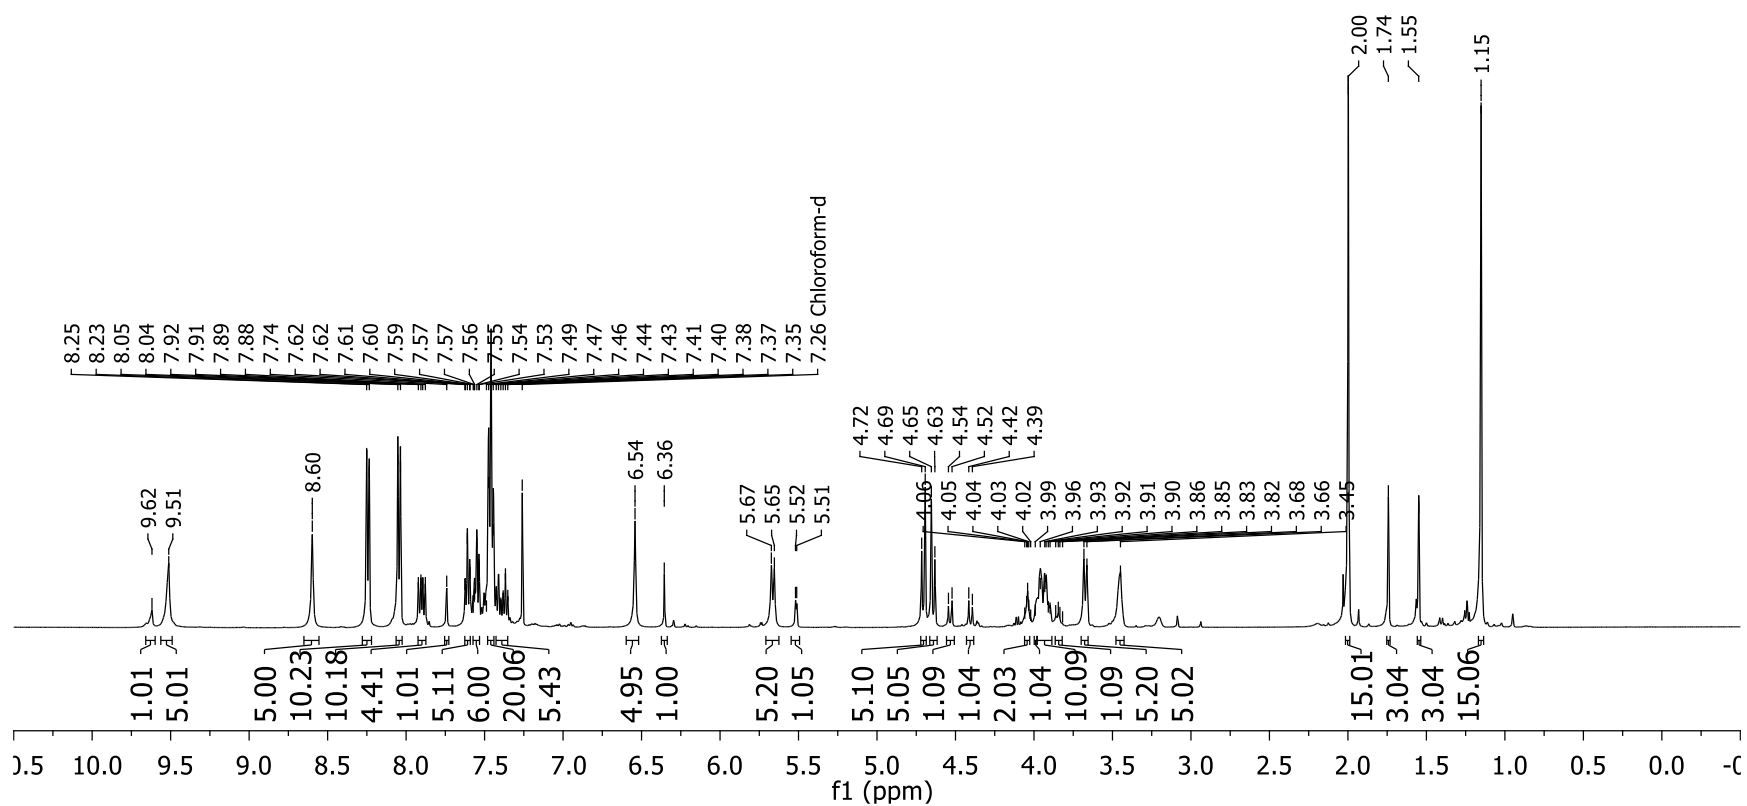

$^{13}\text{C}\{^1\text{H}\}$ -NMR (126 MHz,  $\text{CDCl}_3$ )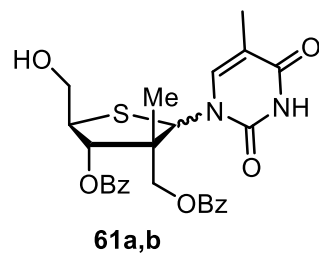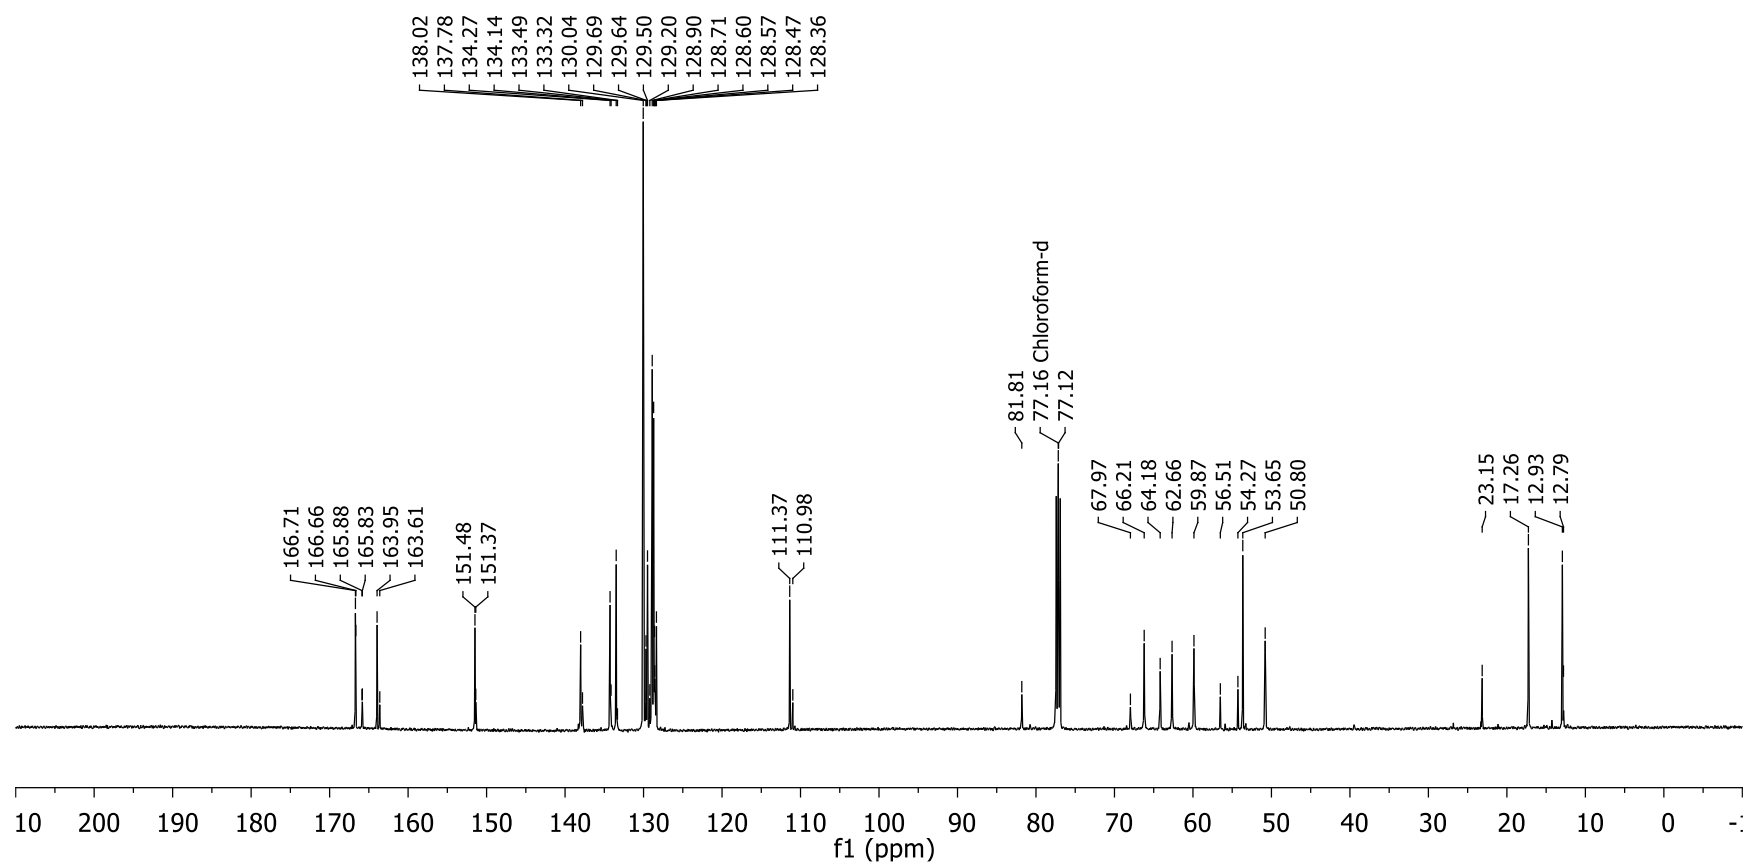



COSY (500 MHz, CDCl<sub>3</sub>)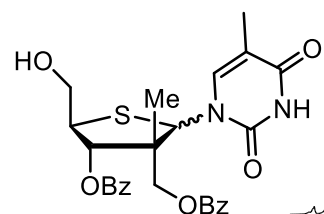**61a,b**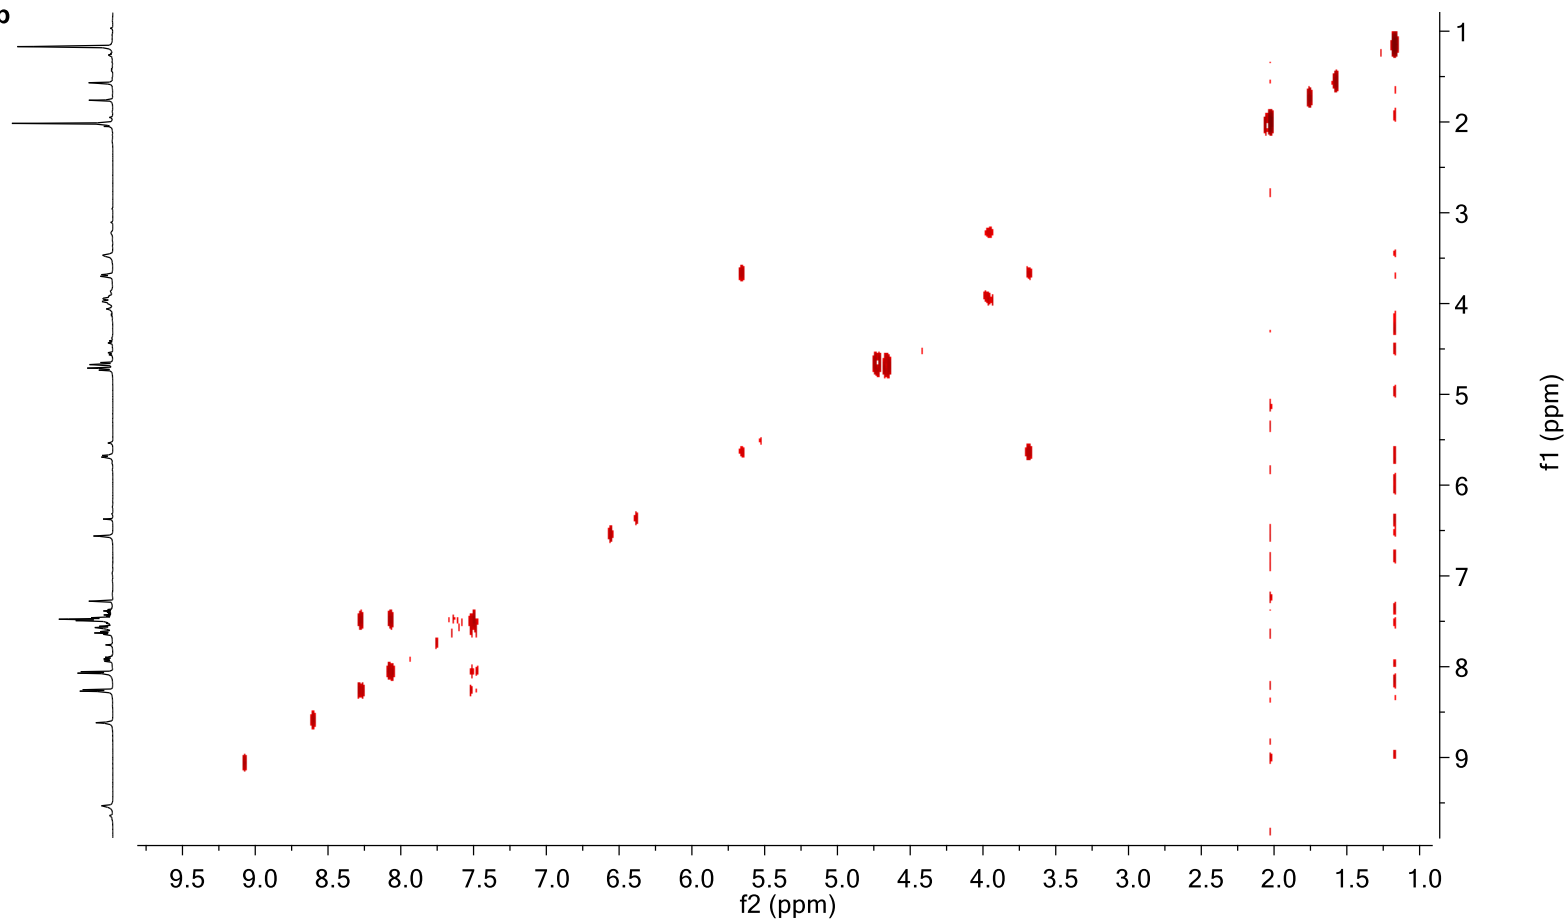

HSQC (500 MHz, CDCl<sub>3</sub>)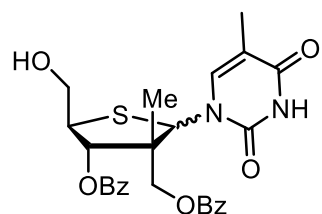**61a,b**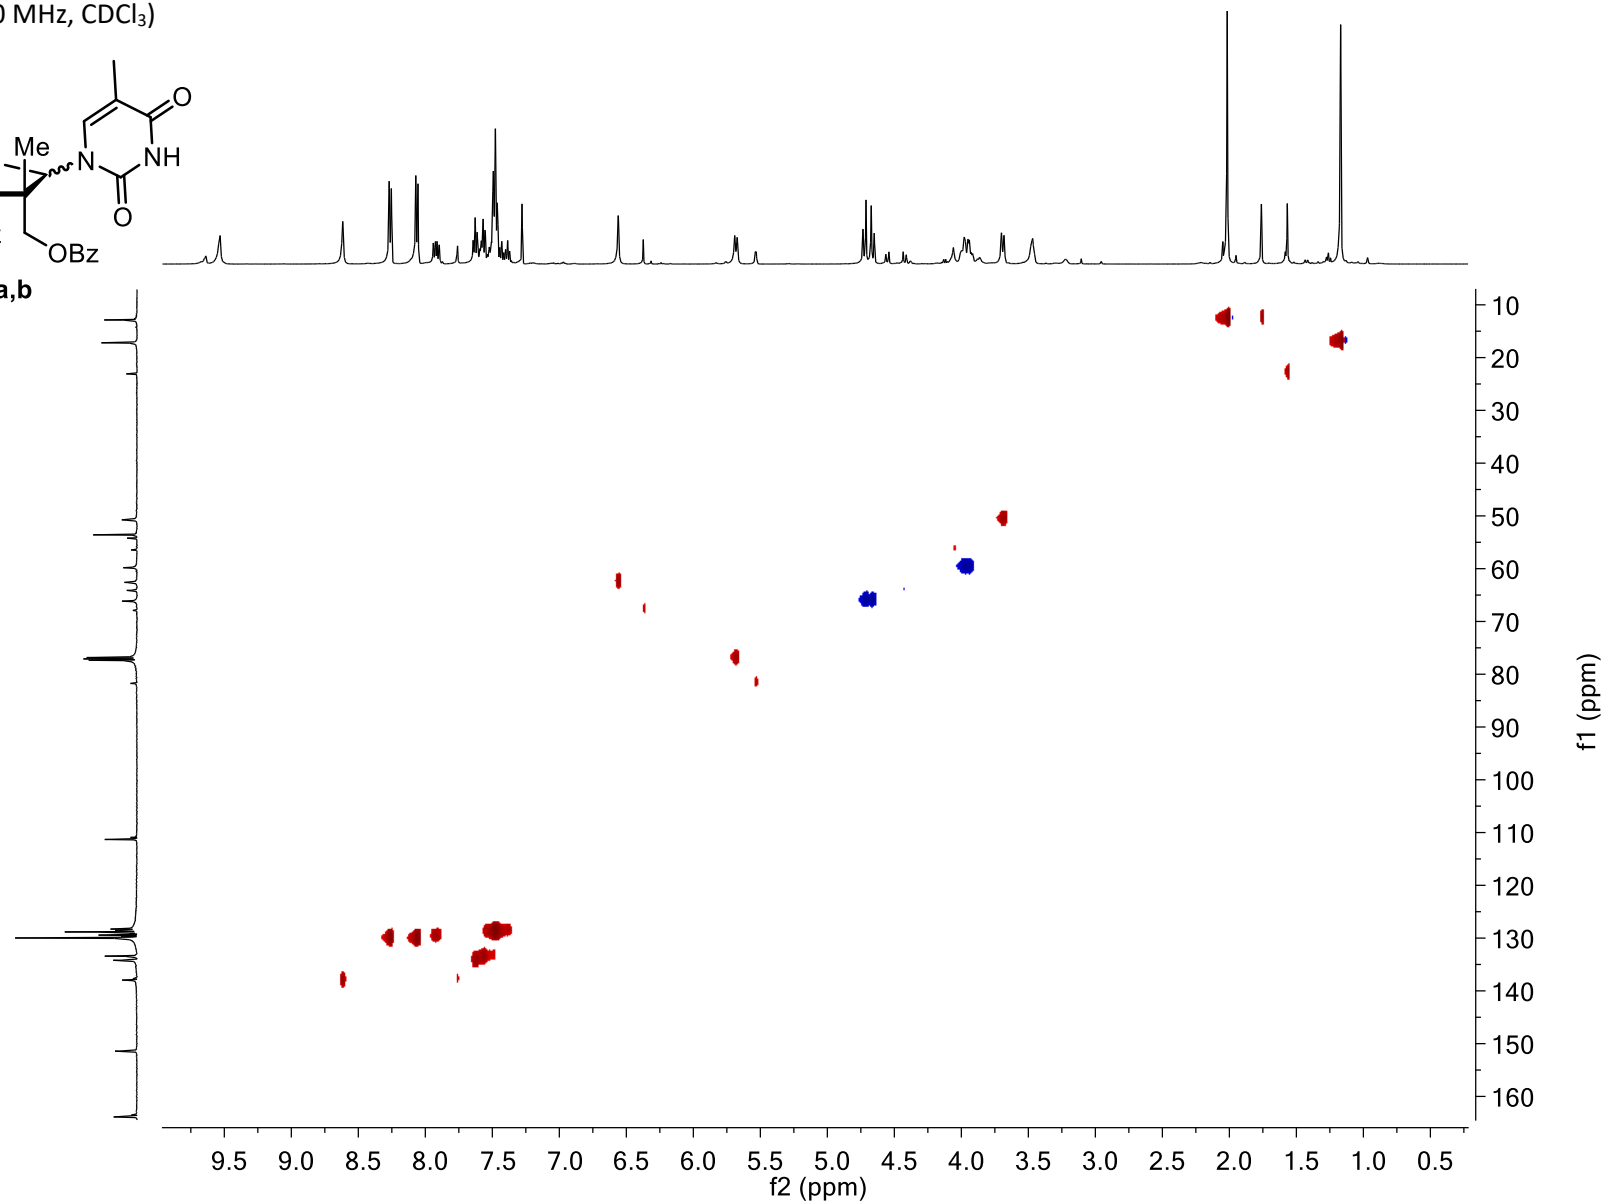

NOESY (500 MHz, CDCl<sub>3</sub>)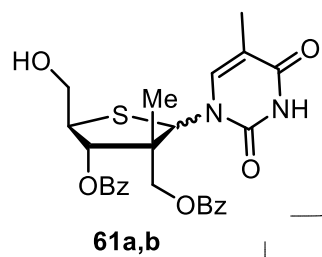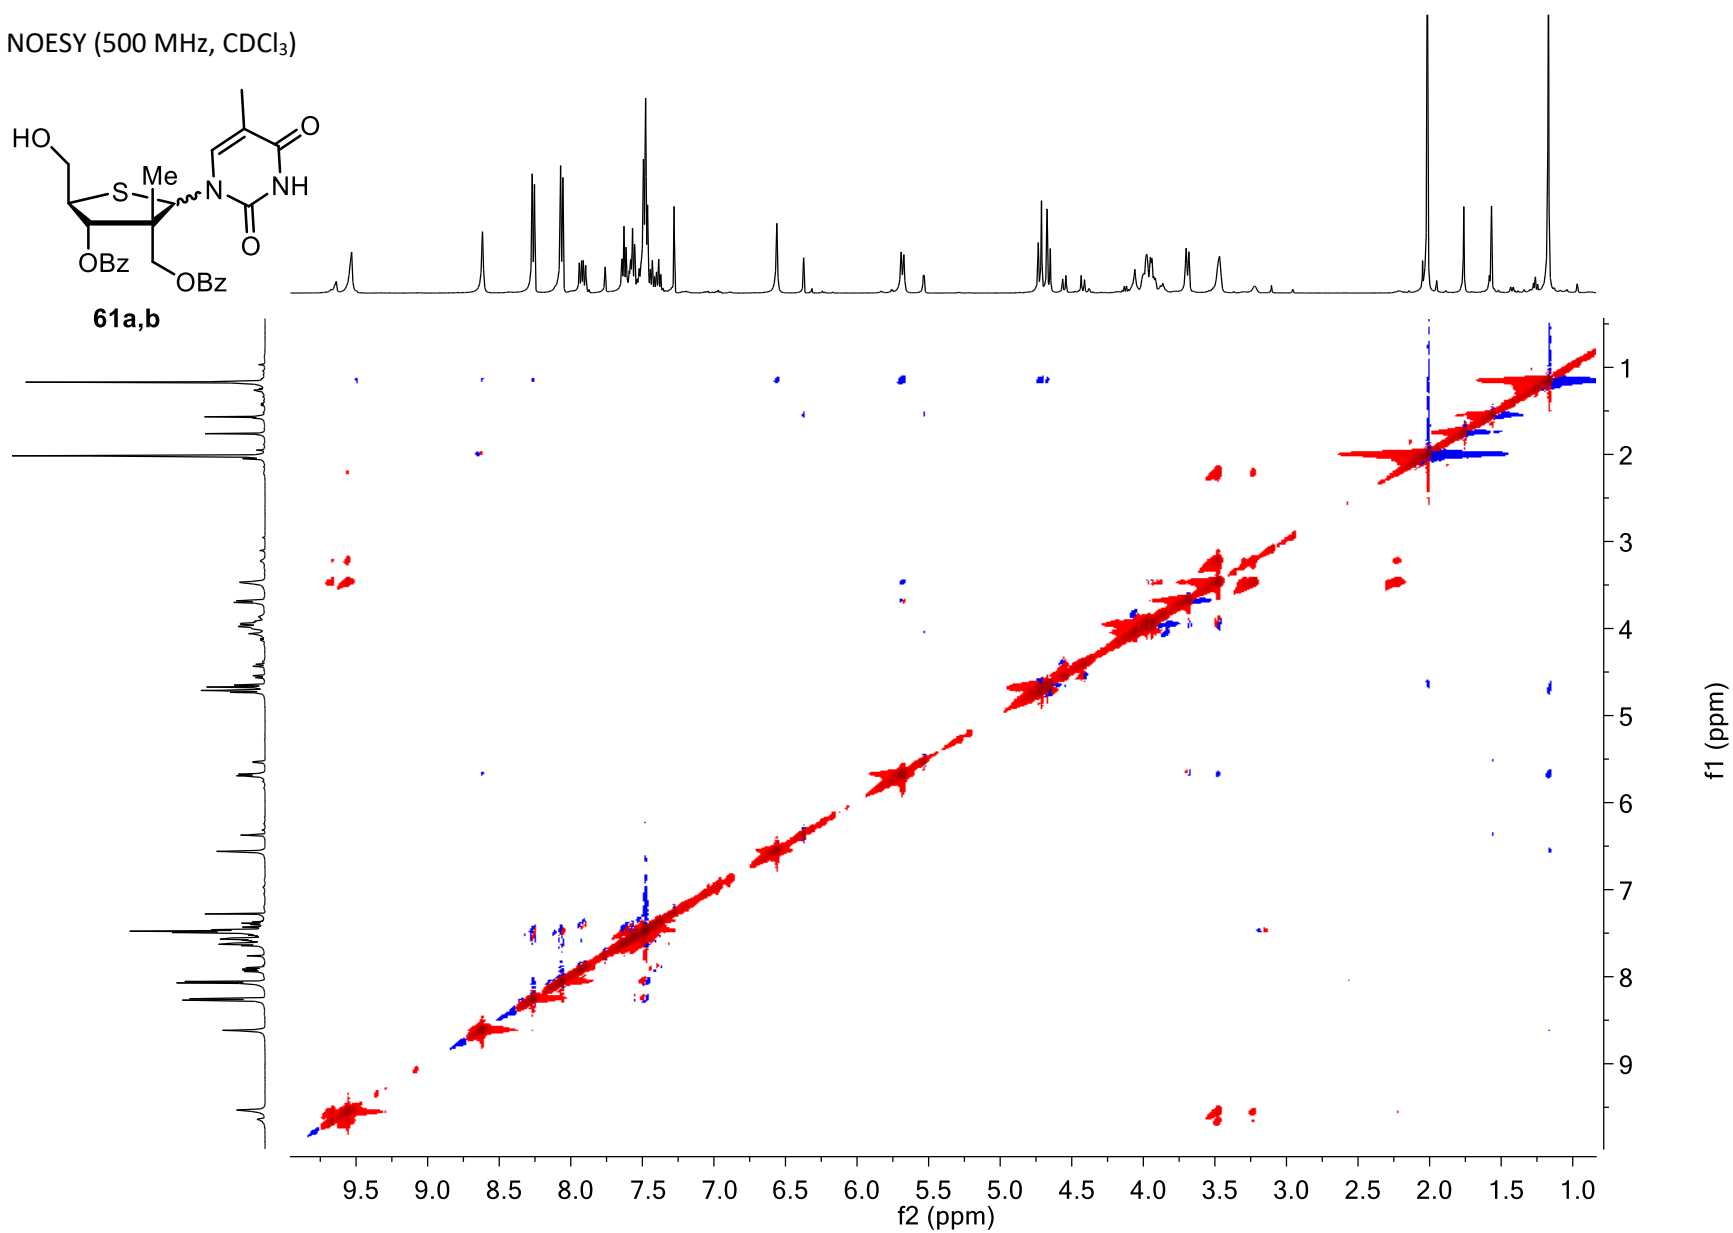

$^1\text{H}$ -NMR (500 MHz,  $\text{CD}_3\text{OD}$ )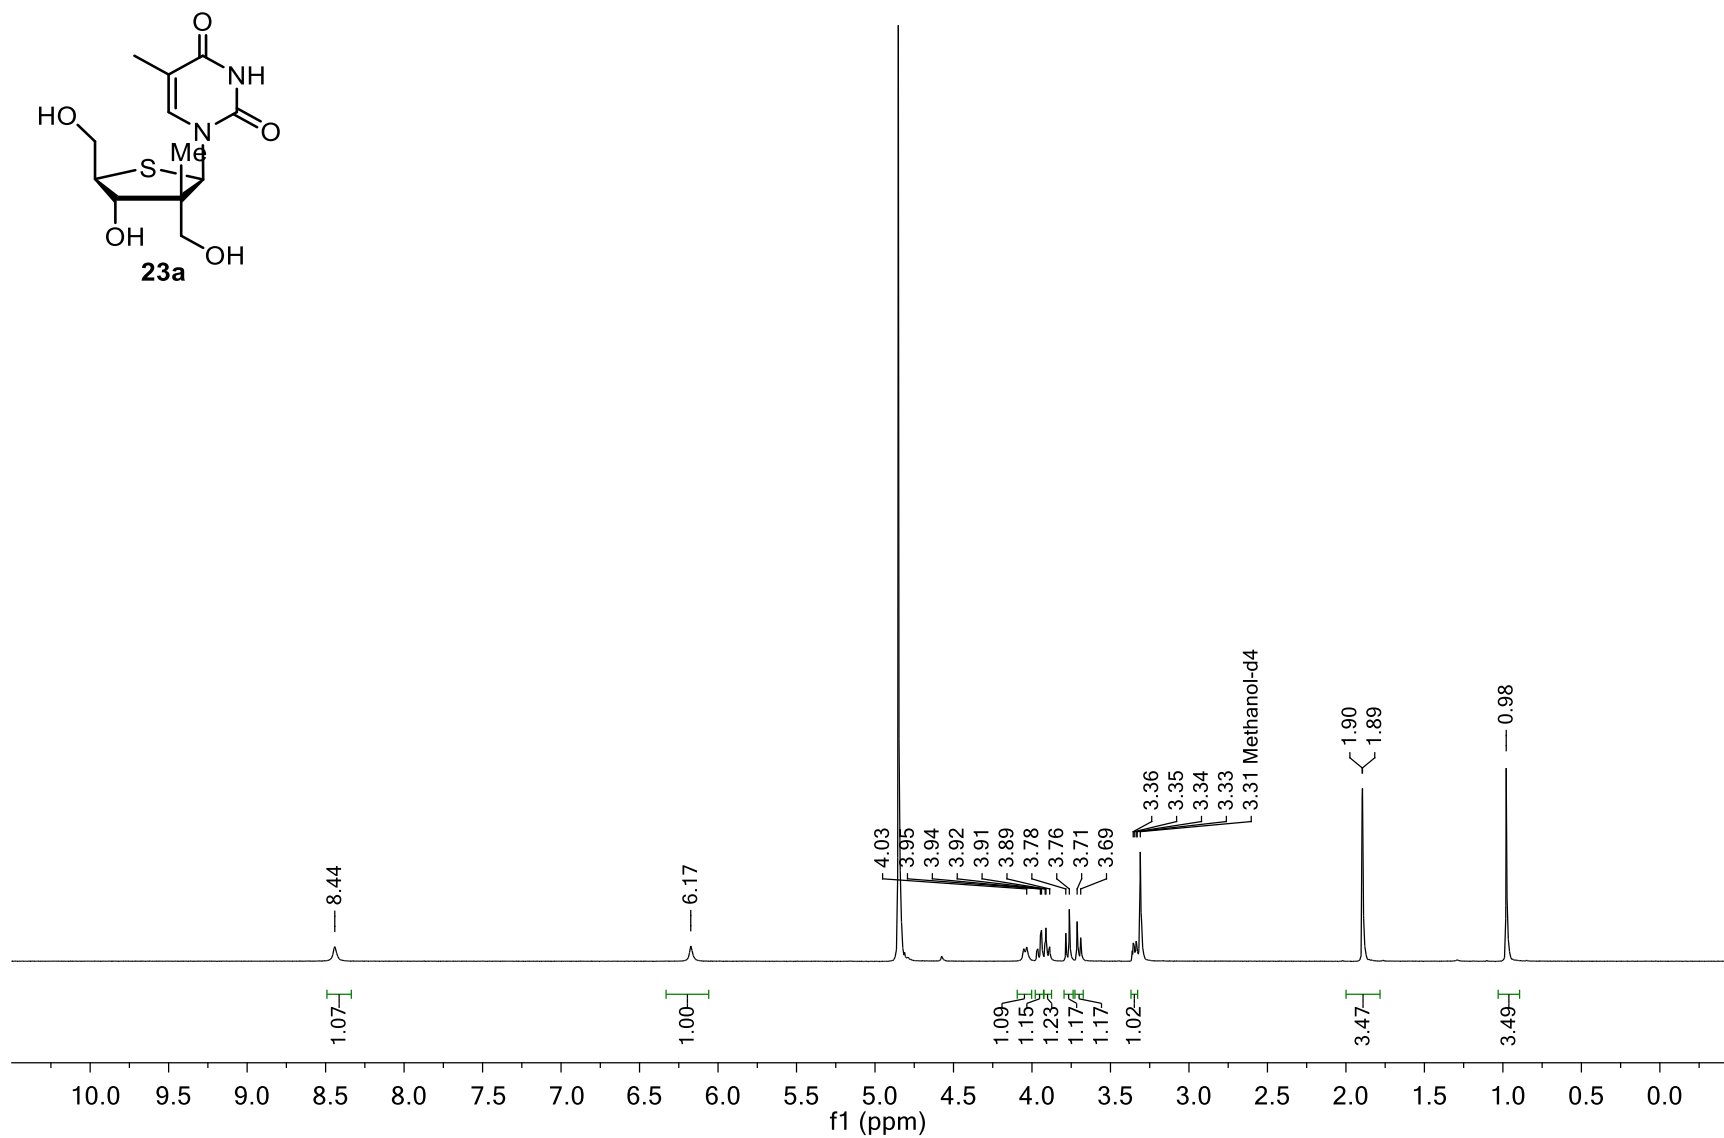

$^{13}\text{C}\{^1\text{H}\}$ -NMR (126 MHz,  $\text{CD}_3\text{OD}$ )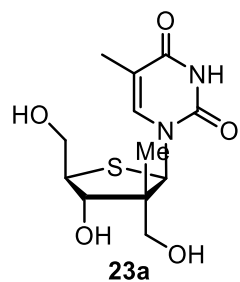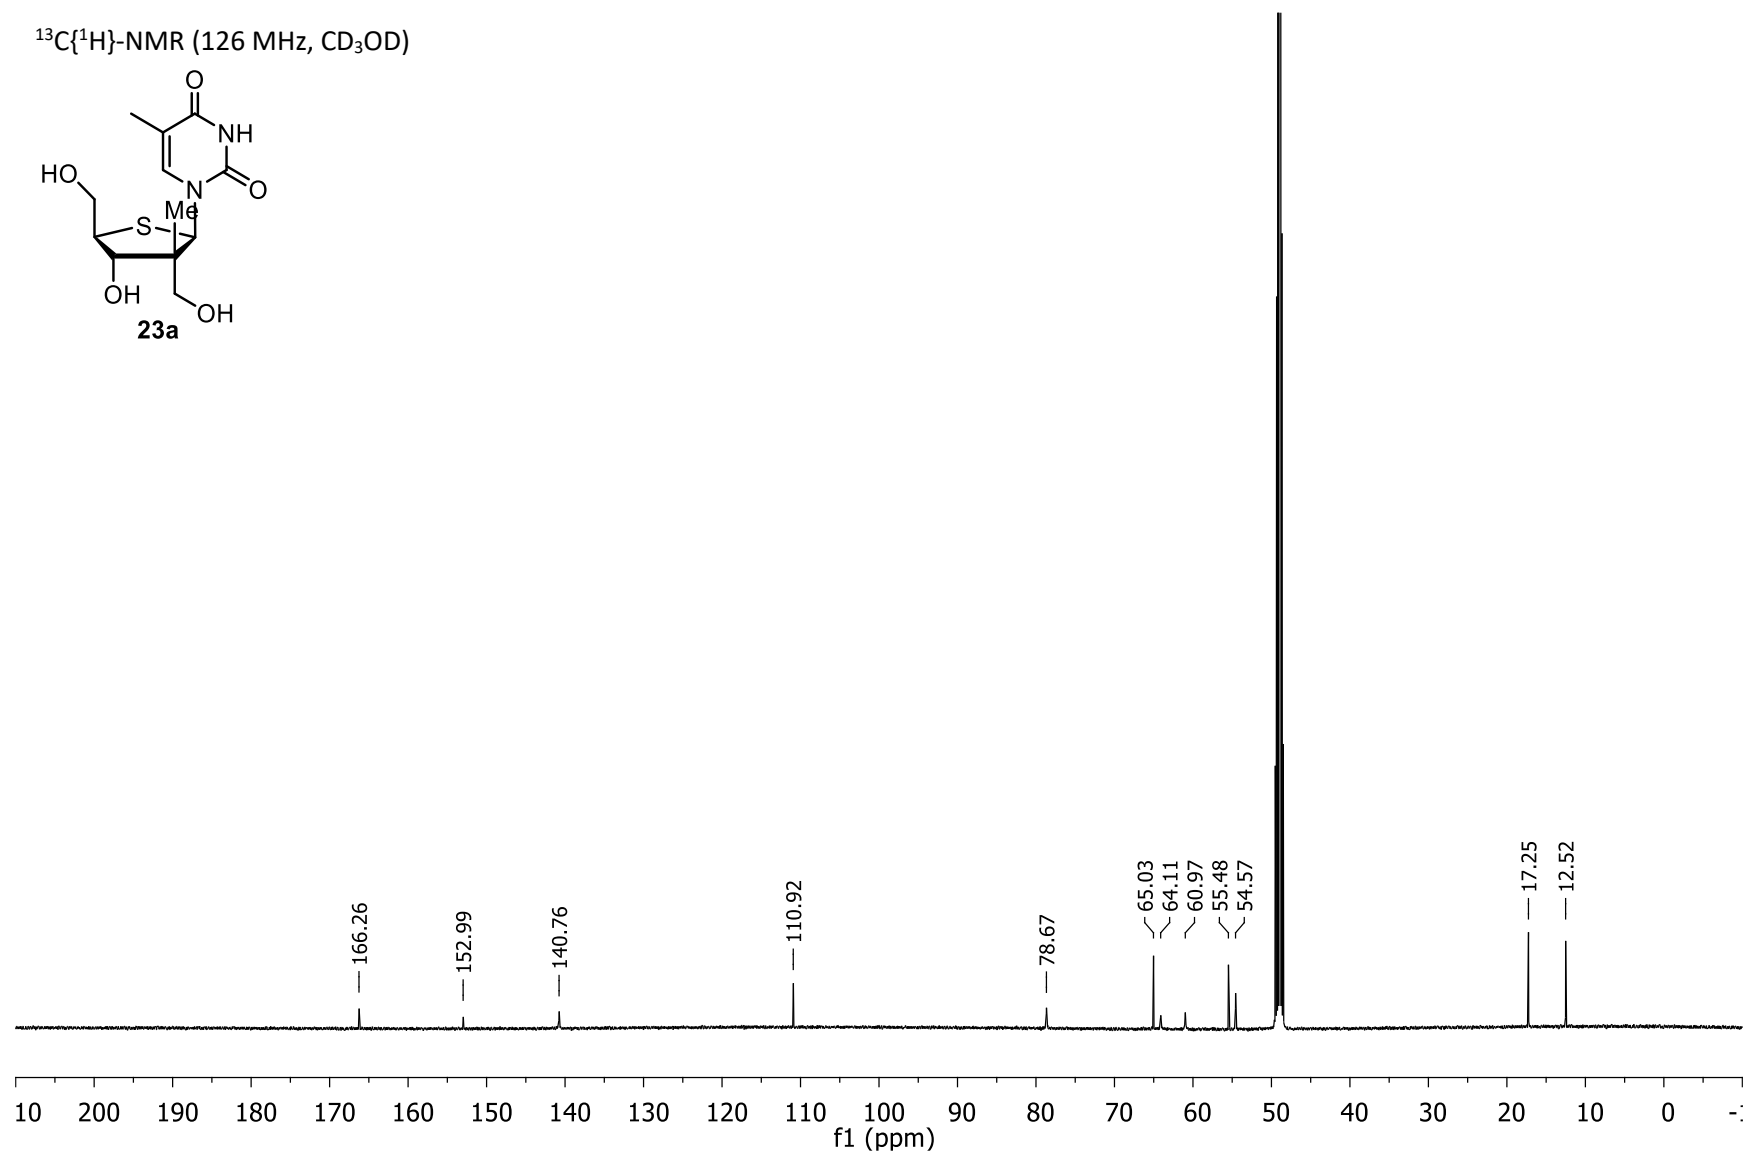

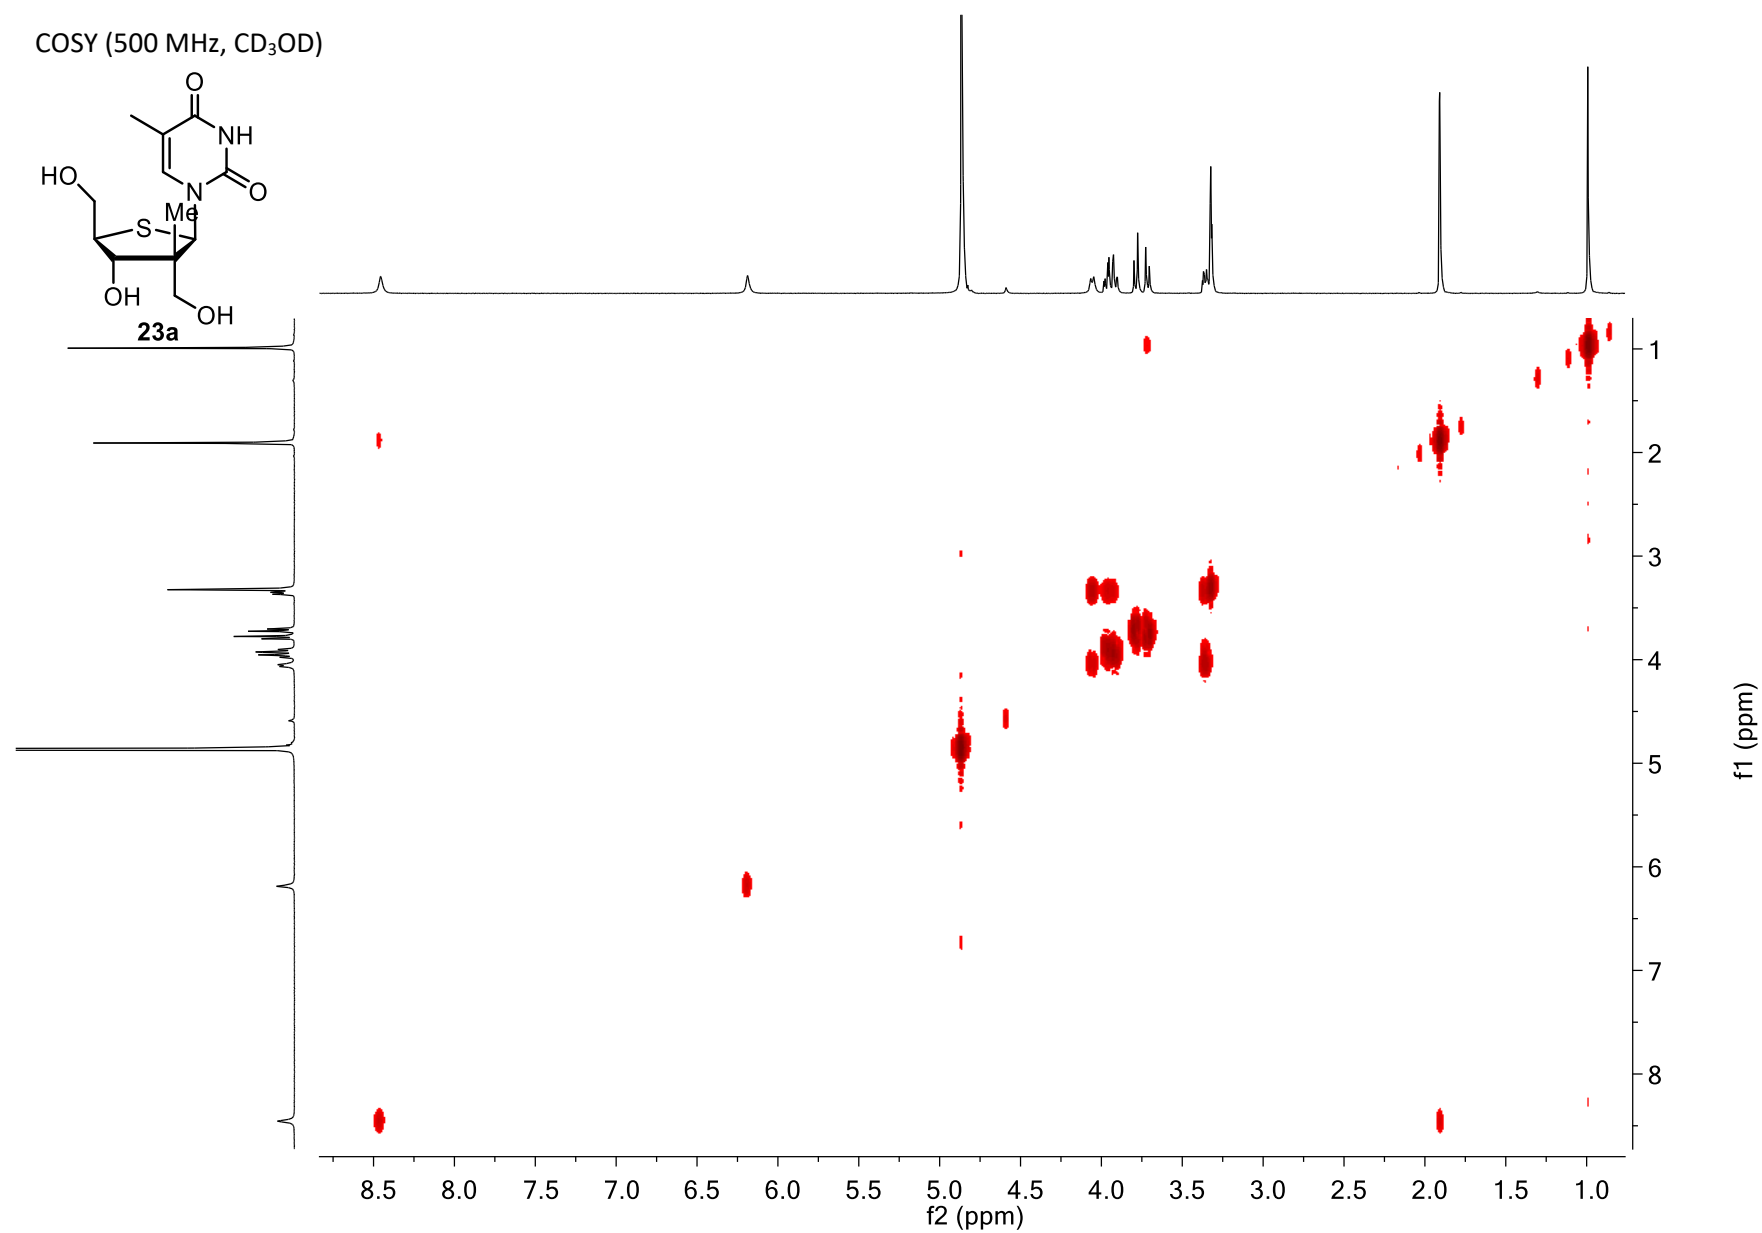

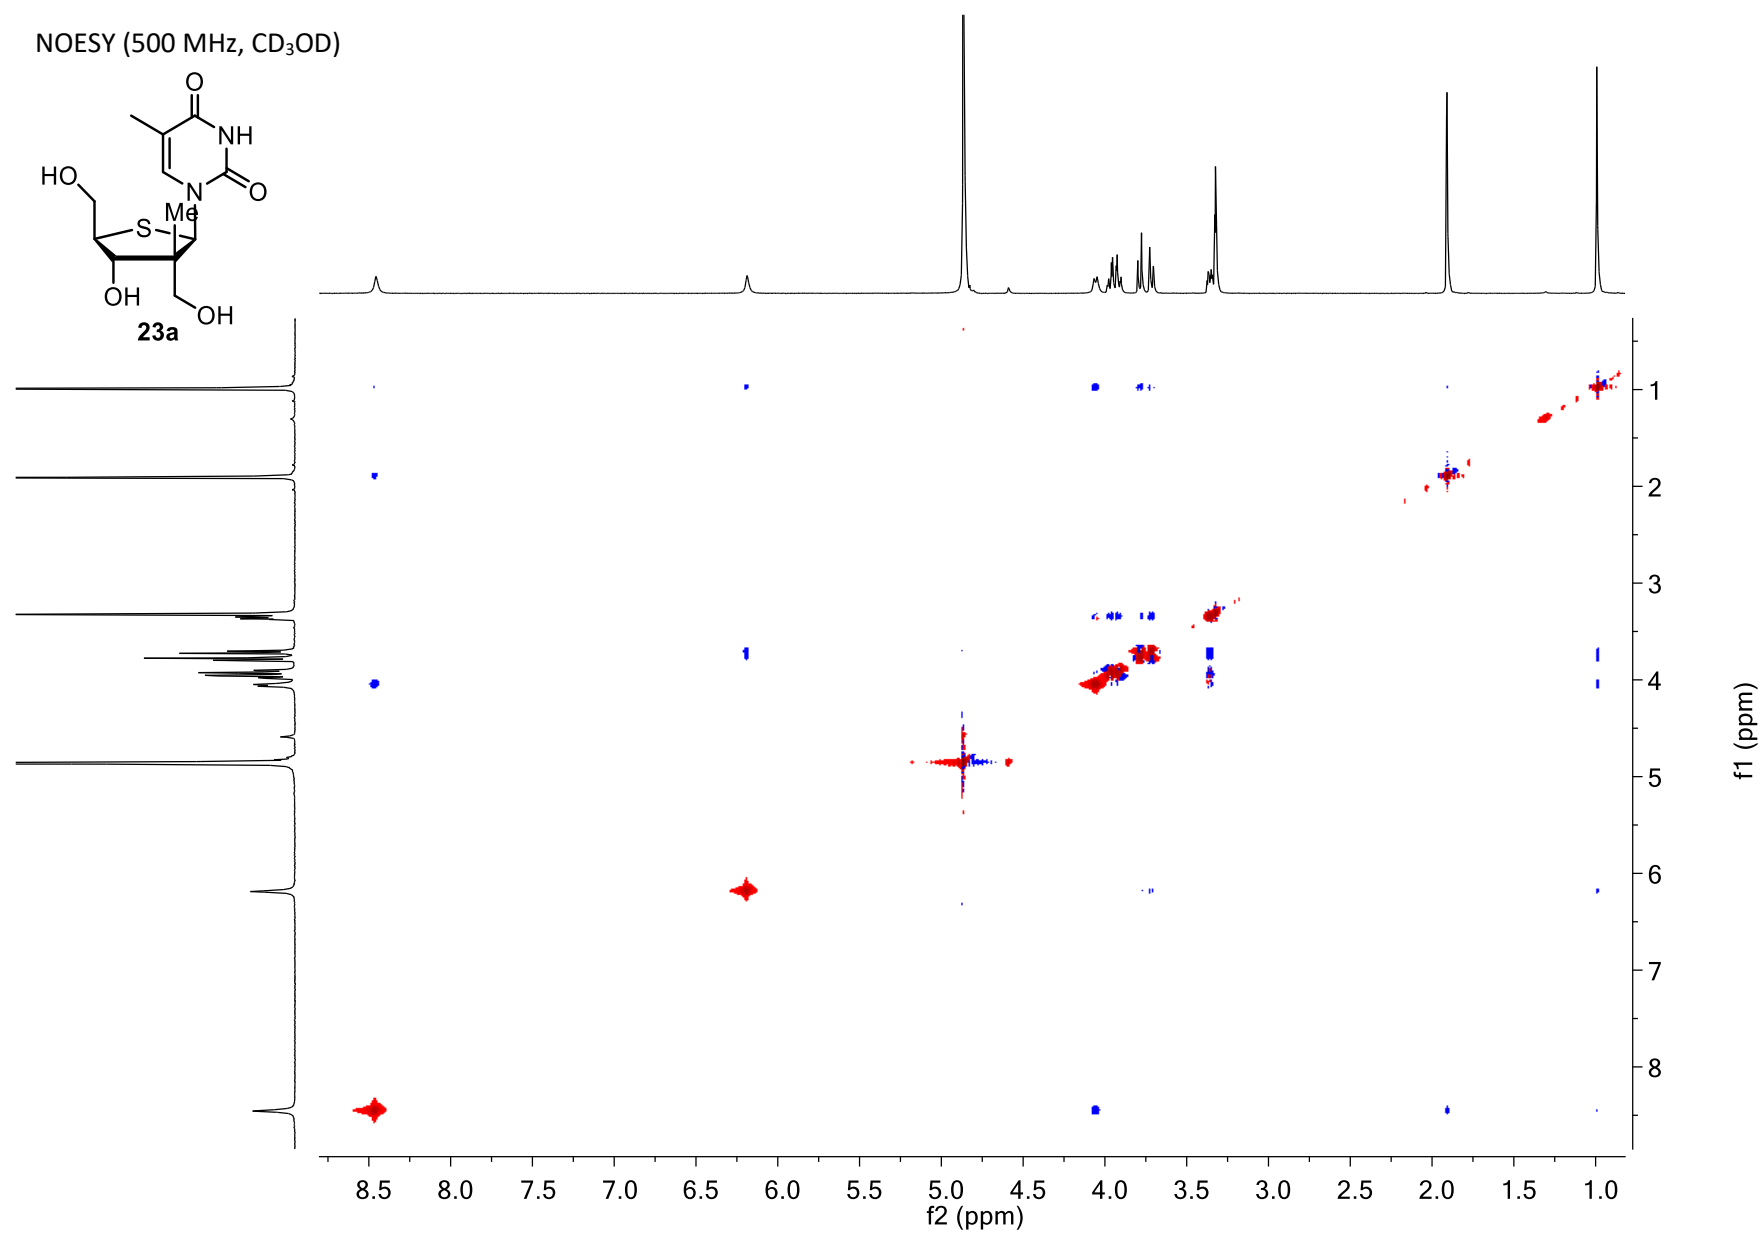

$^1\text{H}$ -NMR (500 MHz,  $\text{CD}_3\text{OD}$ )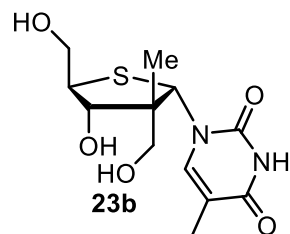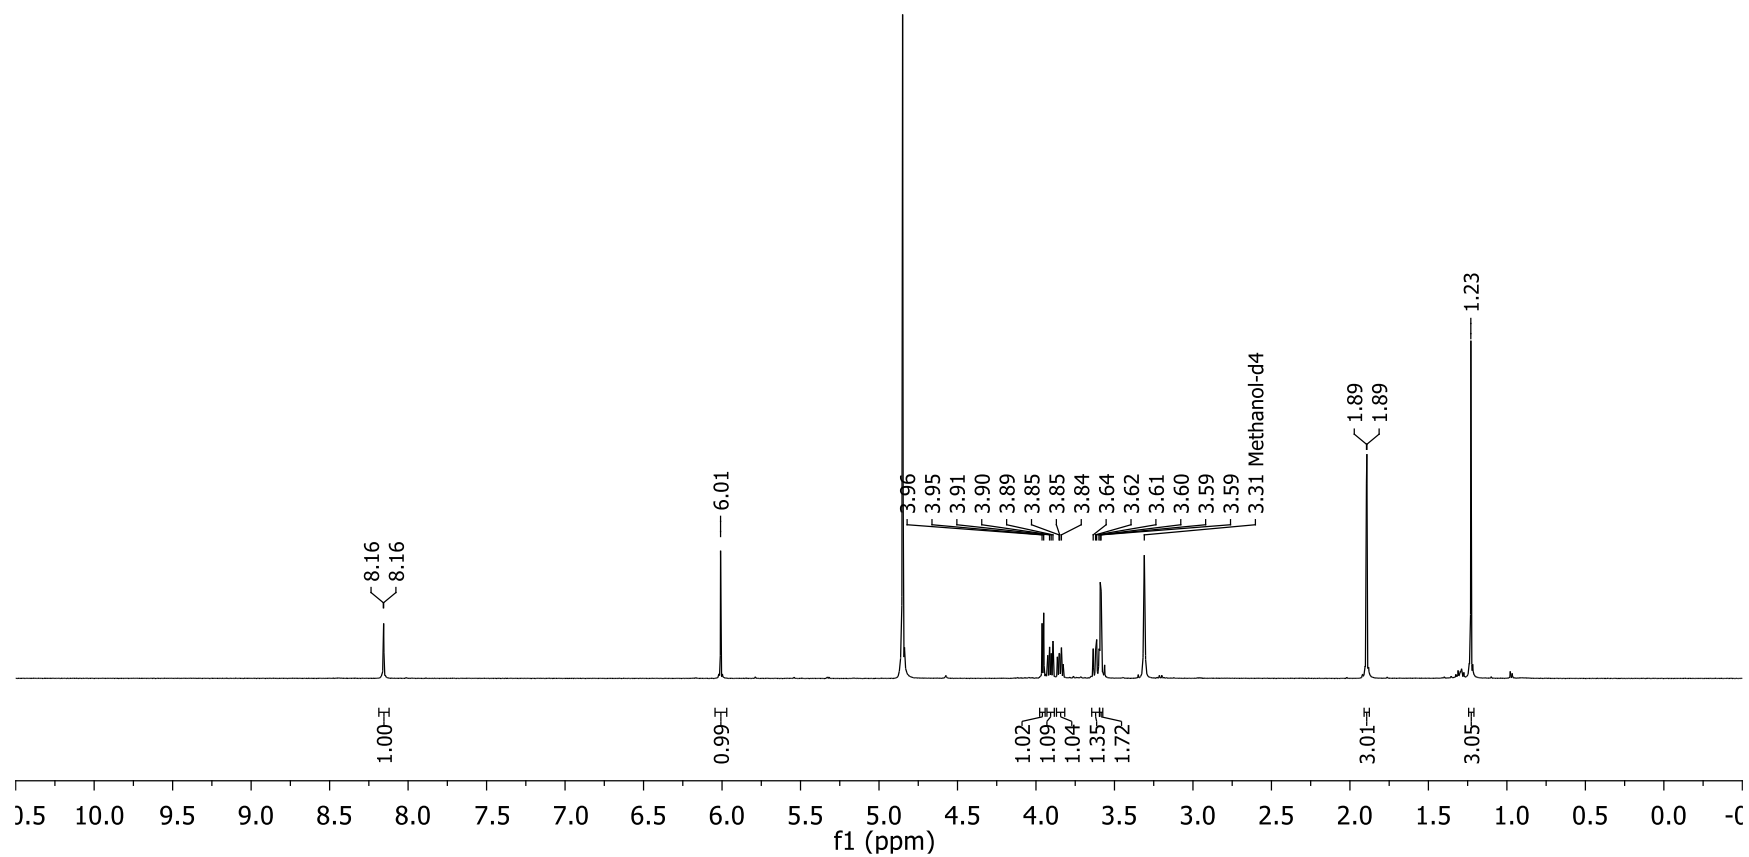



$^{13}\text{C}\{^1\text{H}\}$ -NMR (126 MHz,  $\text{CD}_3\text{OD}$ )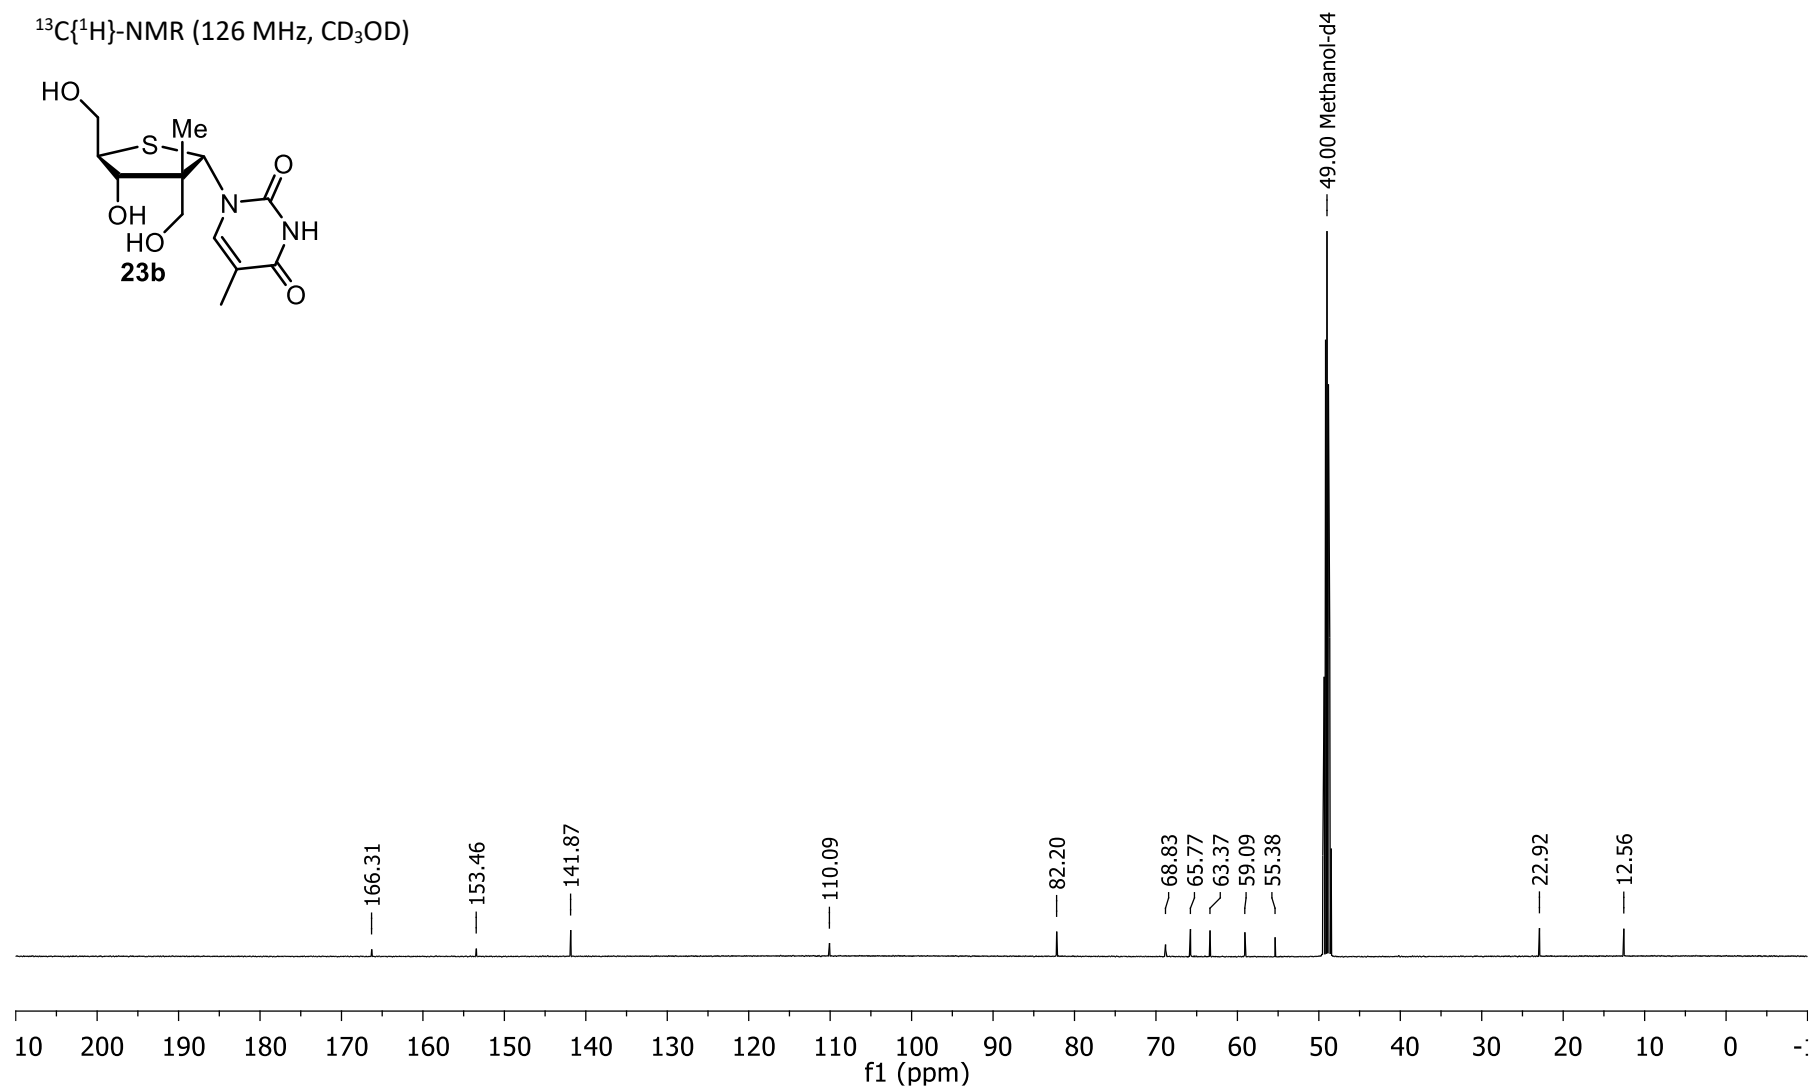

COSY (500 MHz, CD<sub>3</sub>OD)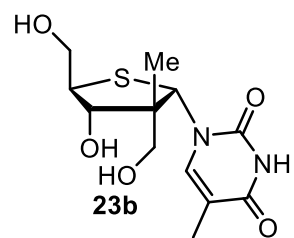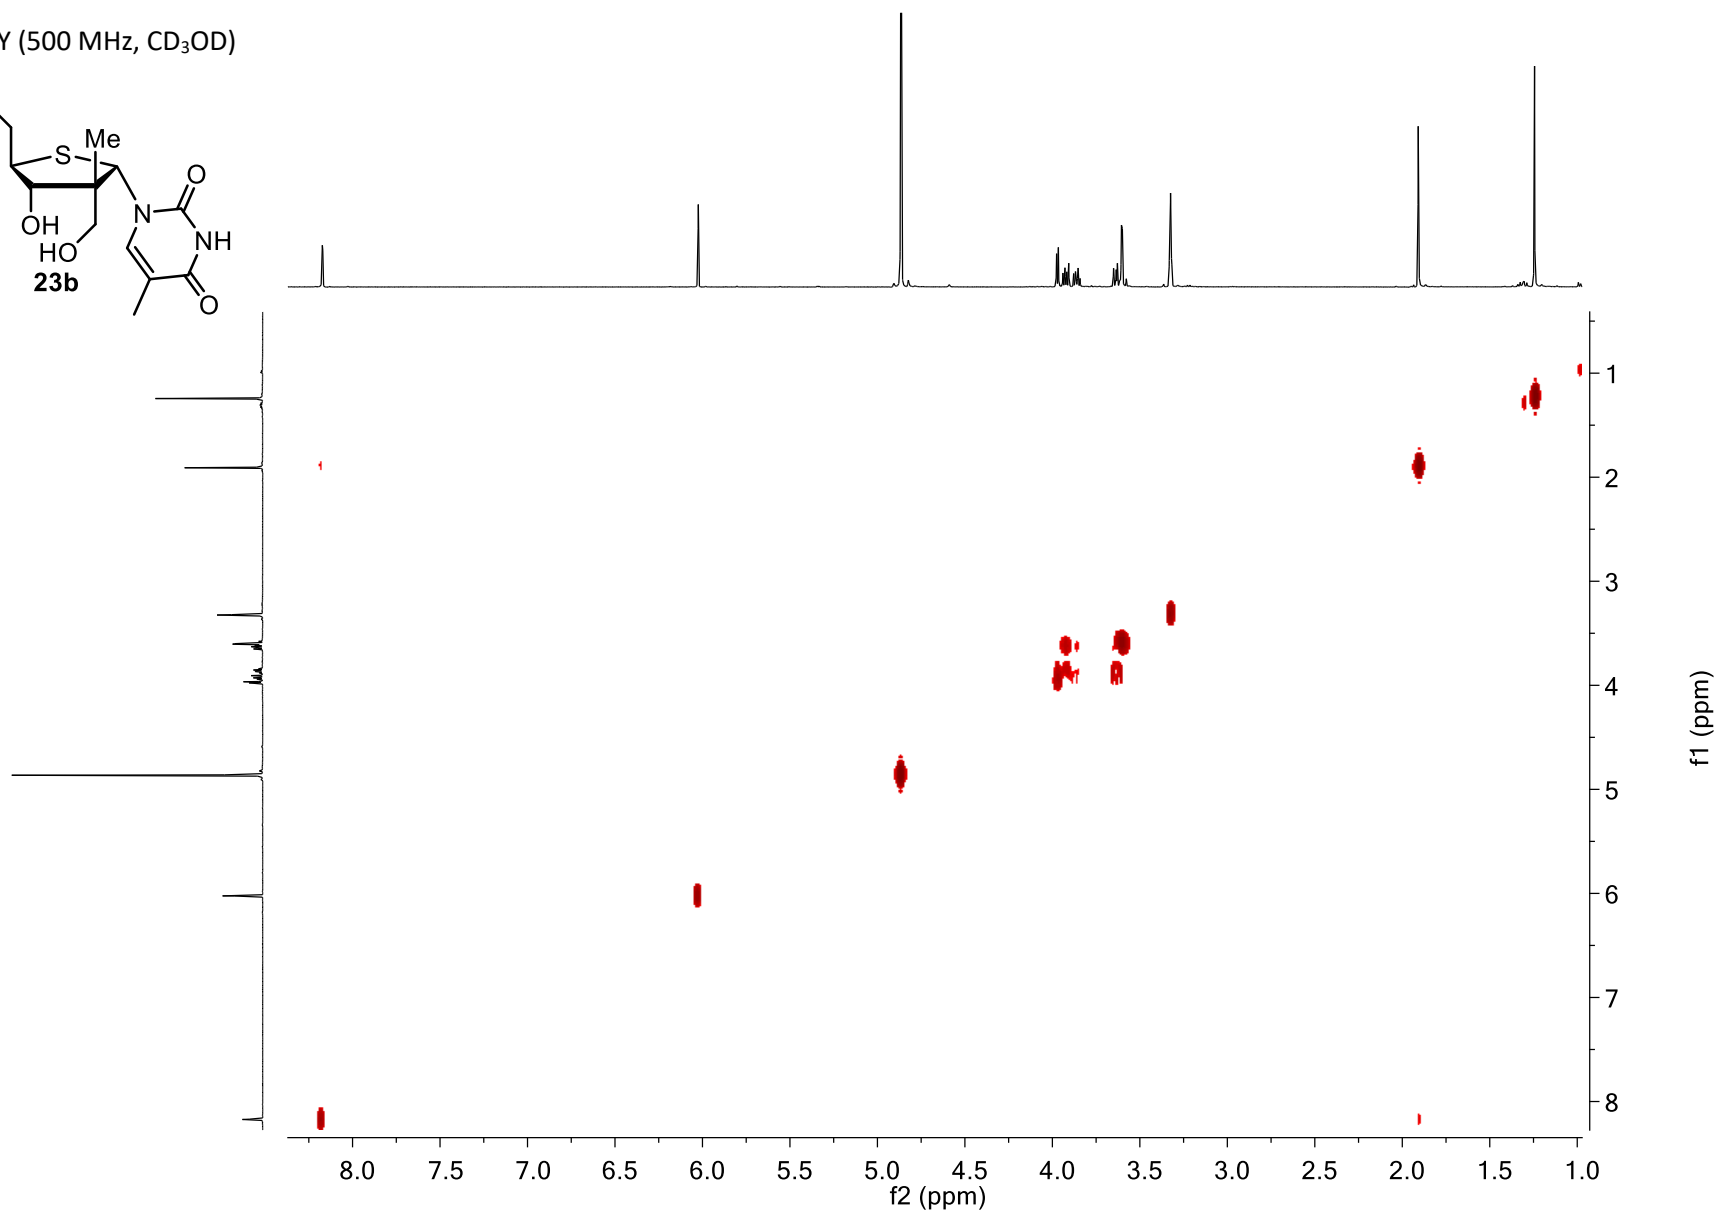

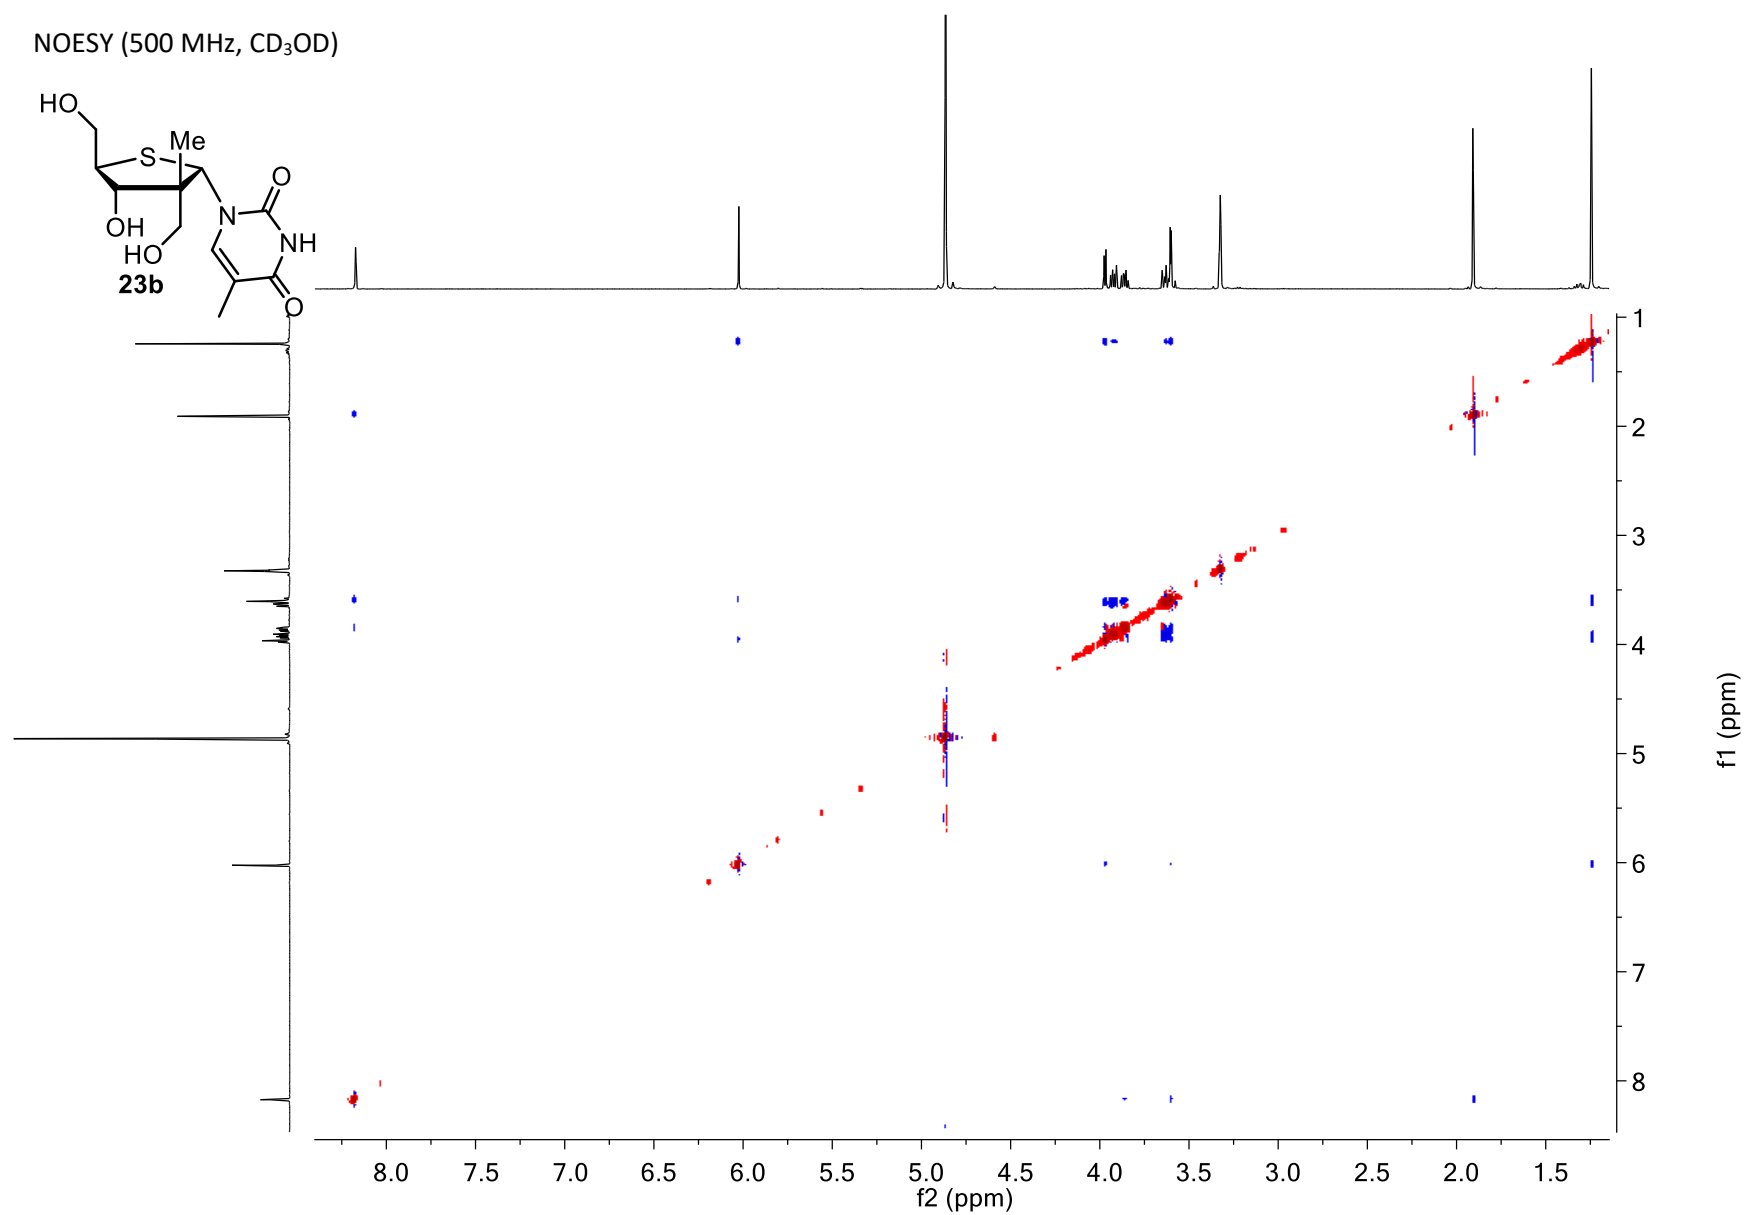

$^1\text{H}$ -NMR (500 MHz,  $\text{CDCl}_3$ )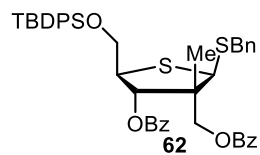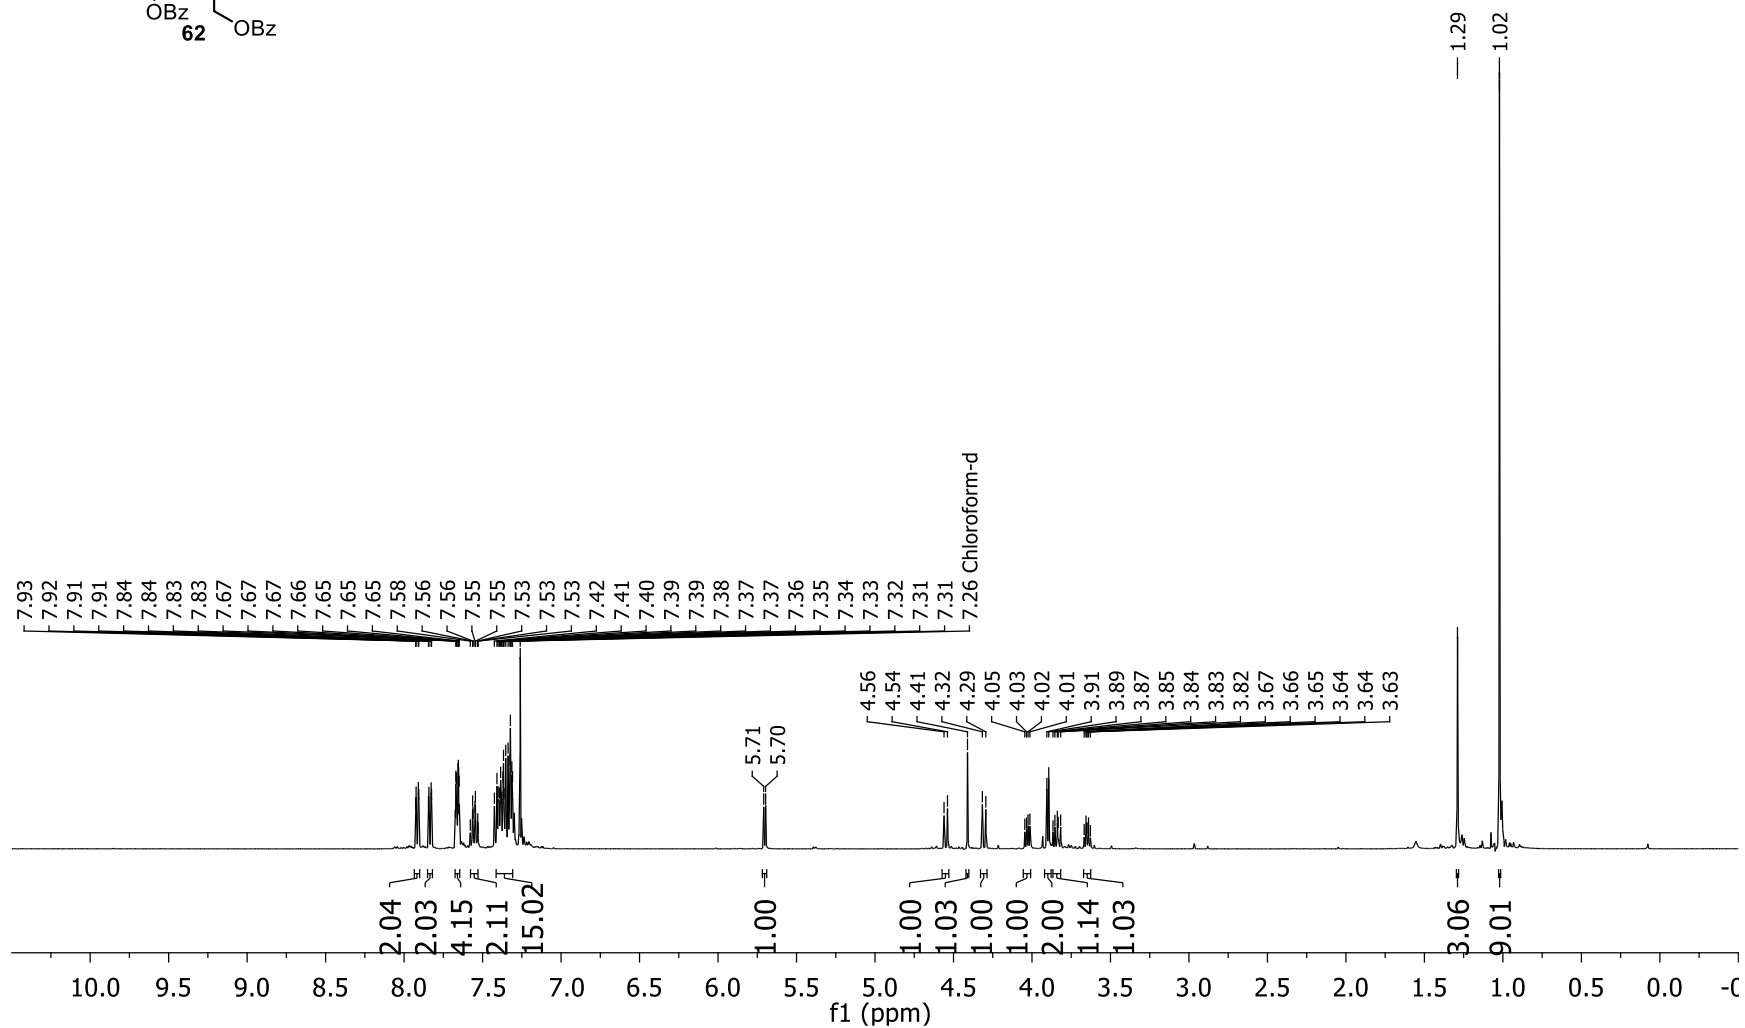

$^{13}\text{C}\{^1\text{H}\}$ -NMR (126 MHz,  $\text{CDCl}_3$ )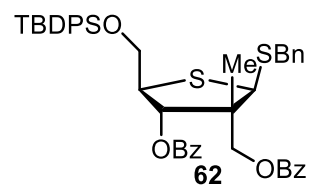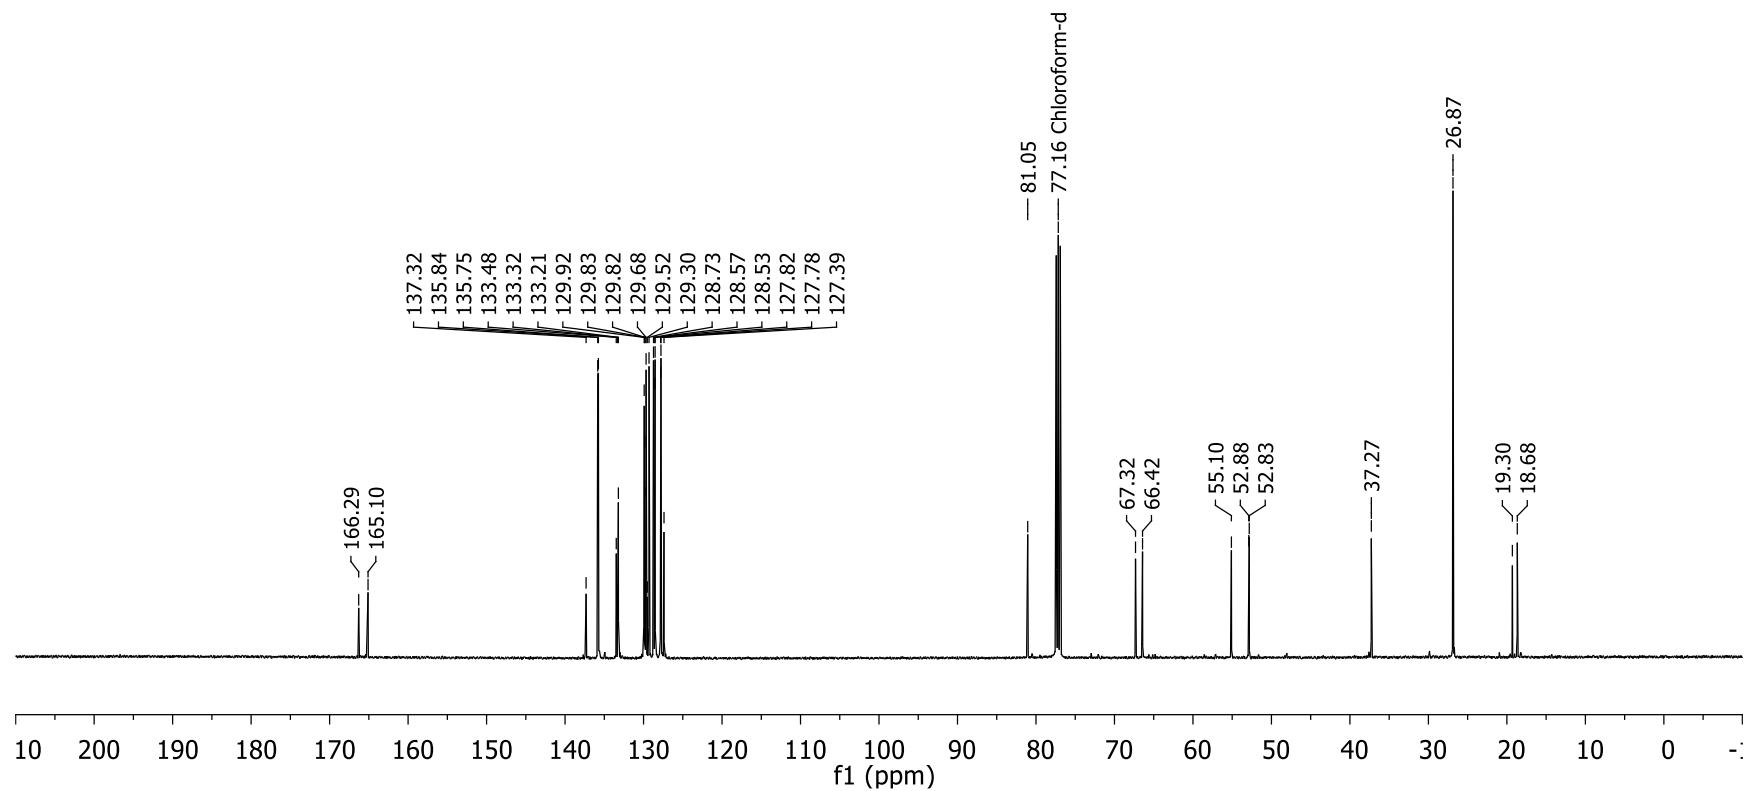

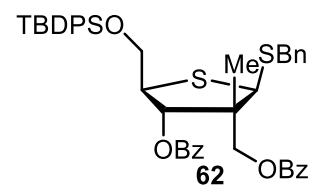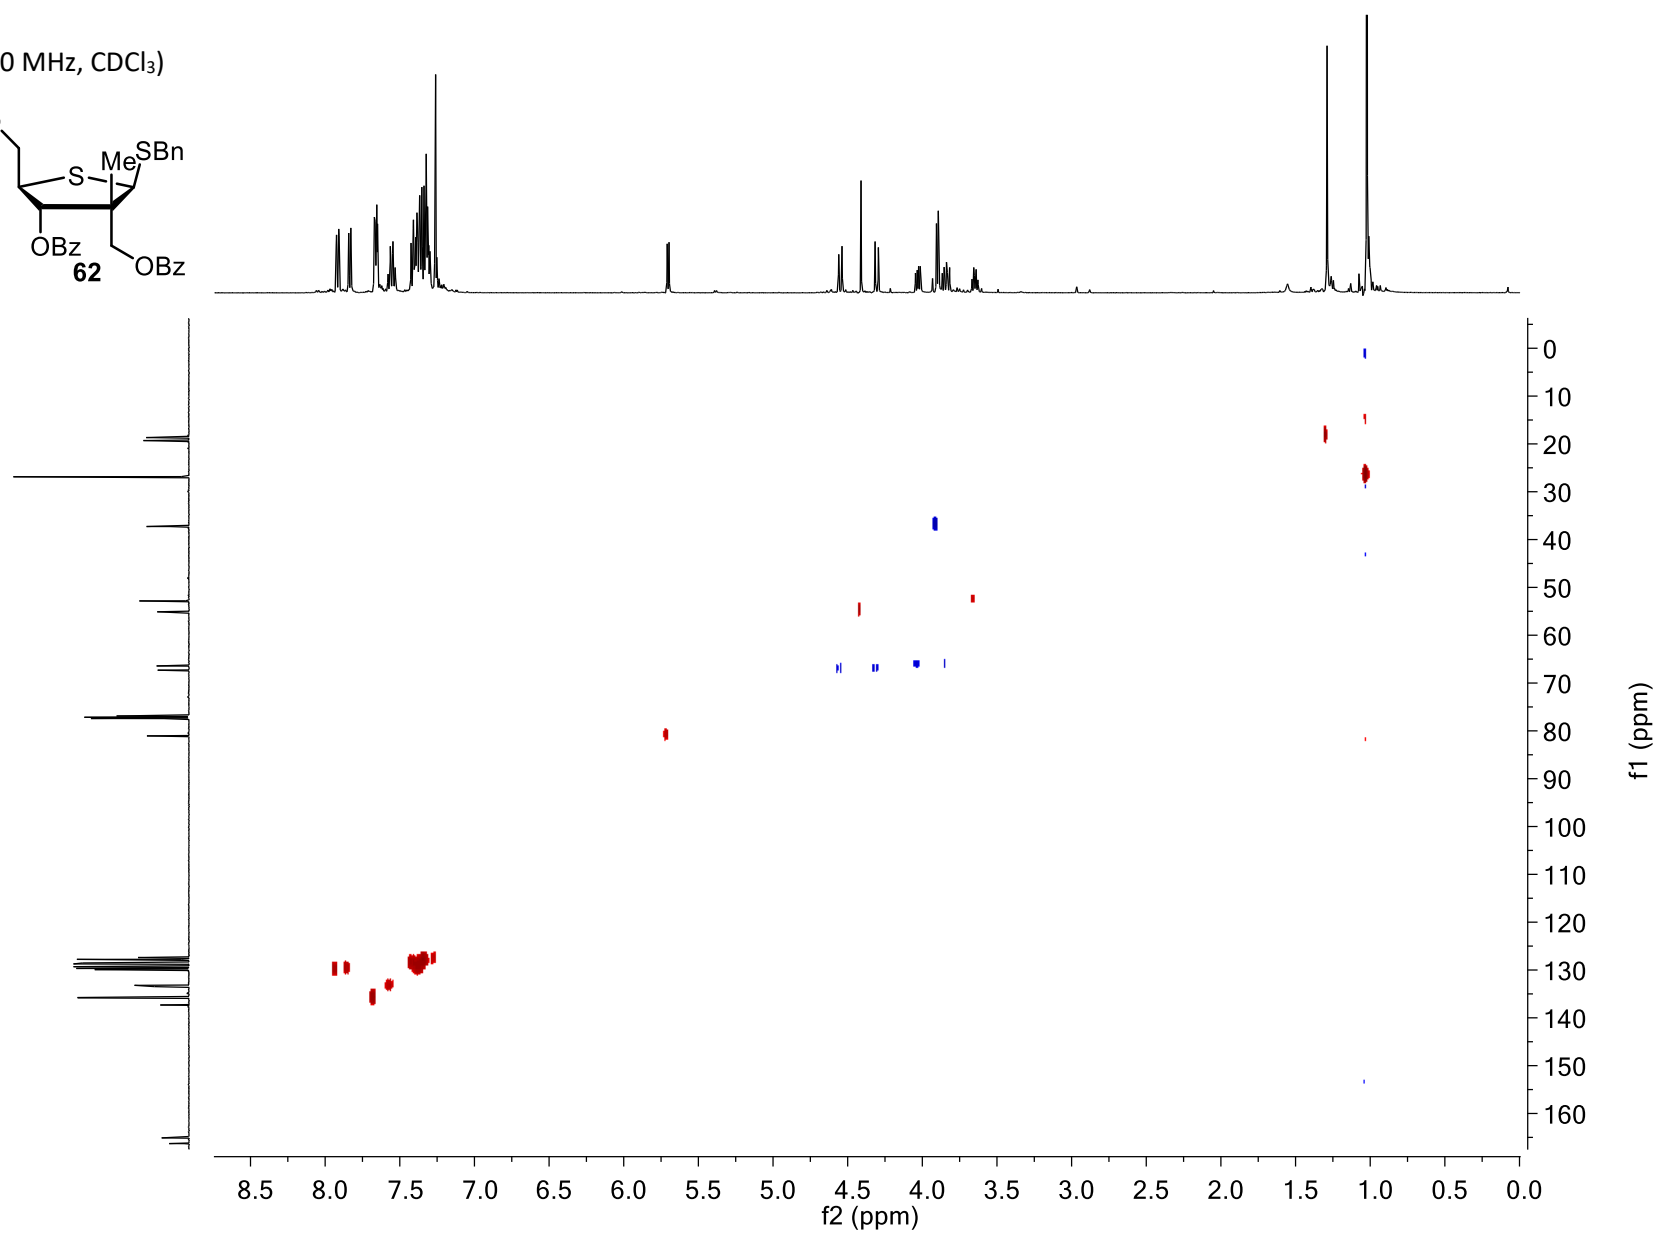

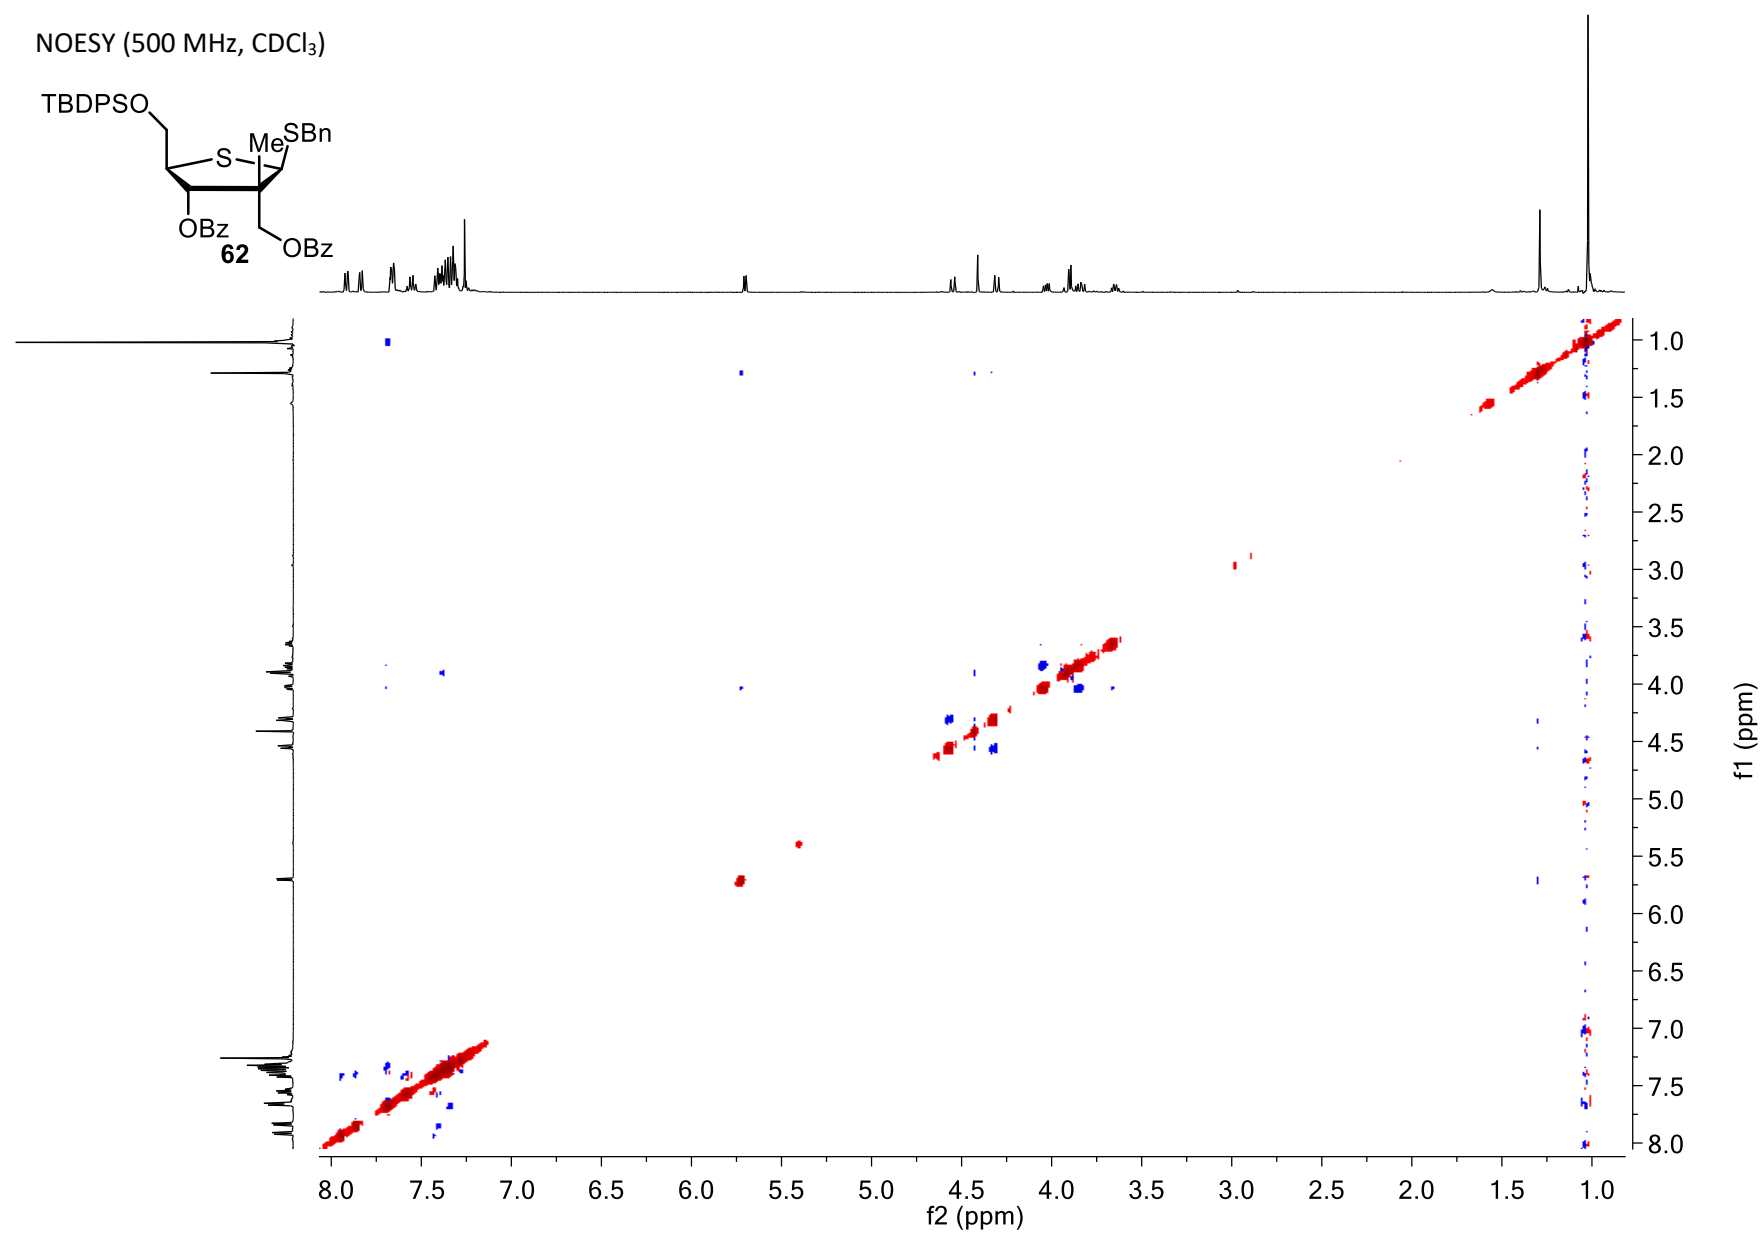

$^1\text{H}$ -NMR (500 MHz,  $\text{CDCl}_3$ )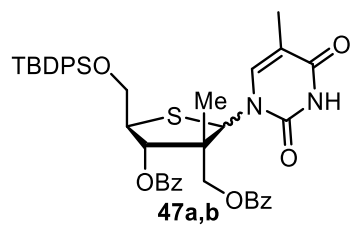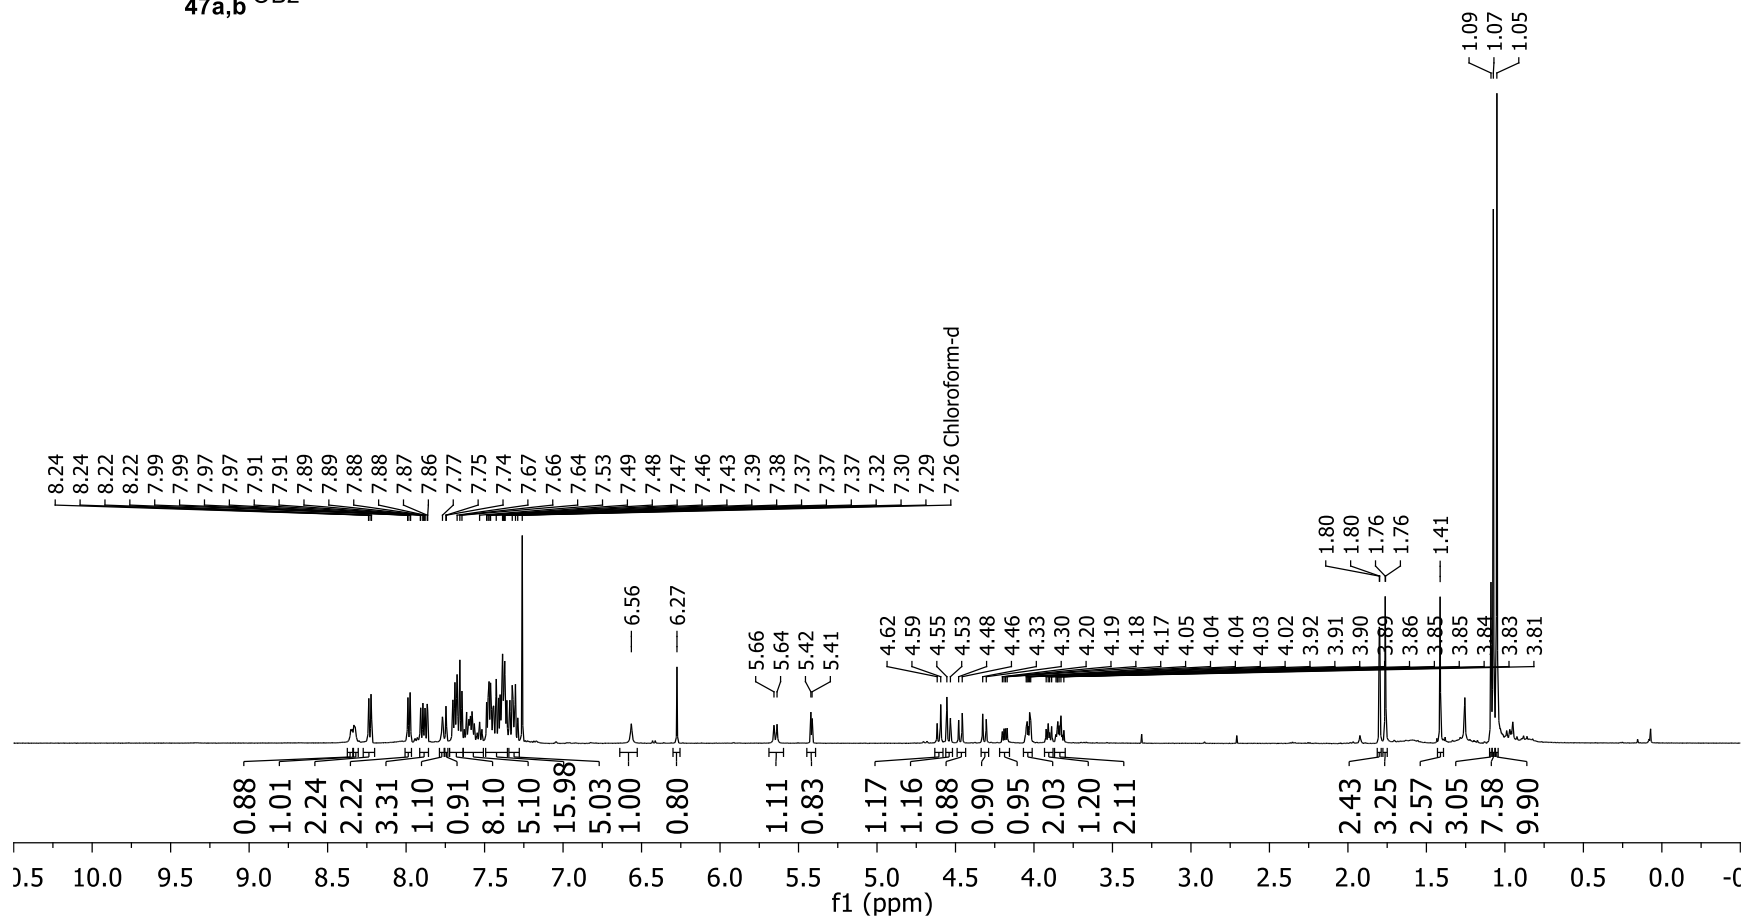



$^{13}\text{C}\{^1\text{H}\}$ -NMR (126 MHz,  $\text{CDCl}_3$ )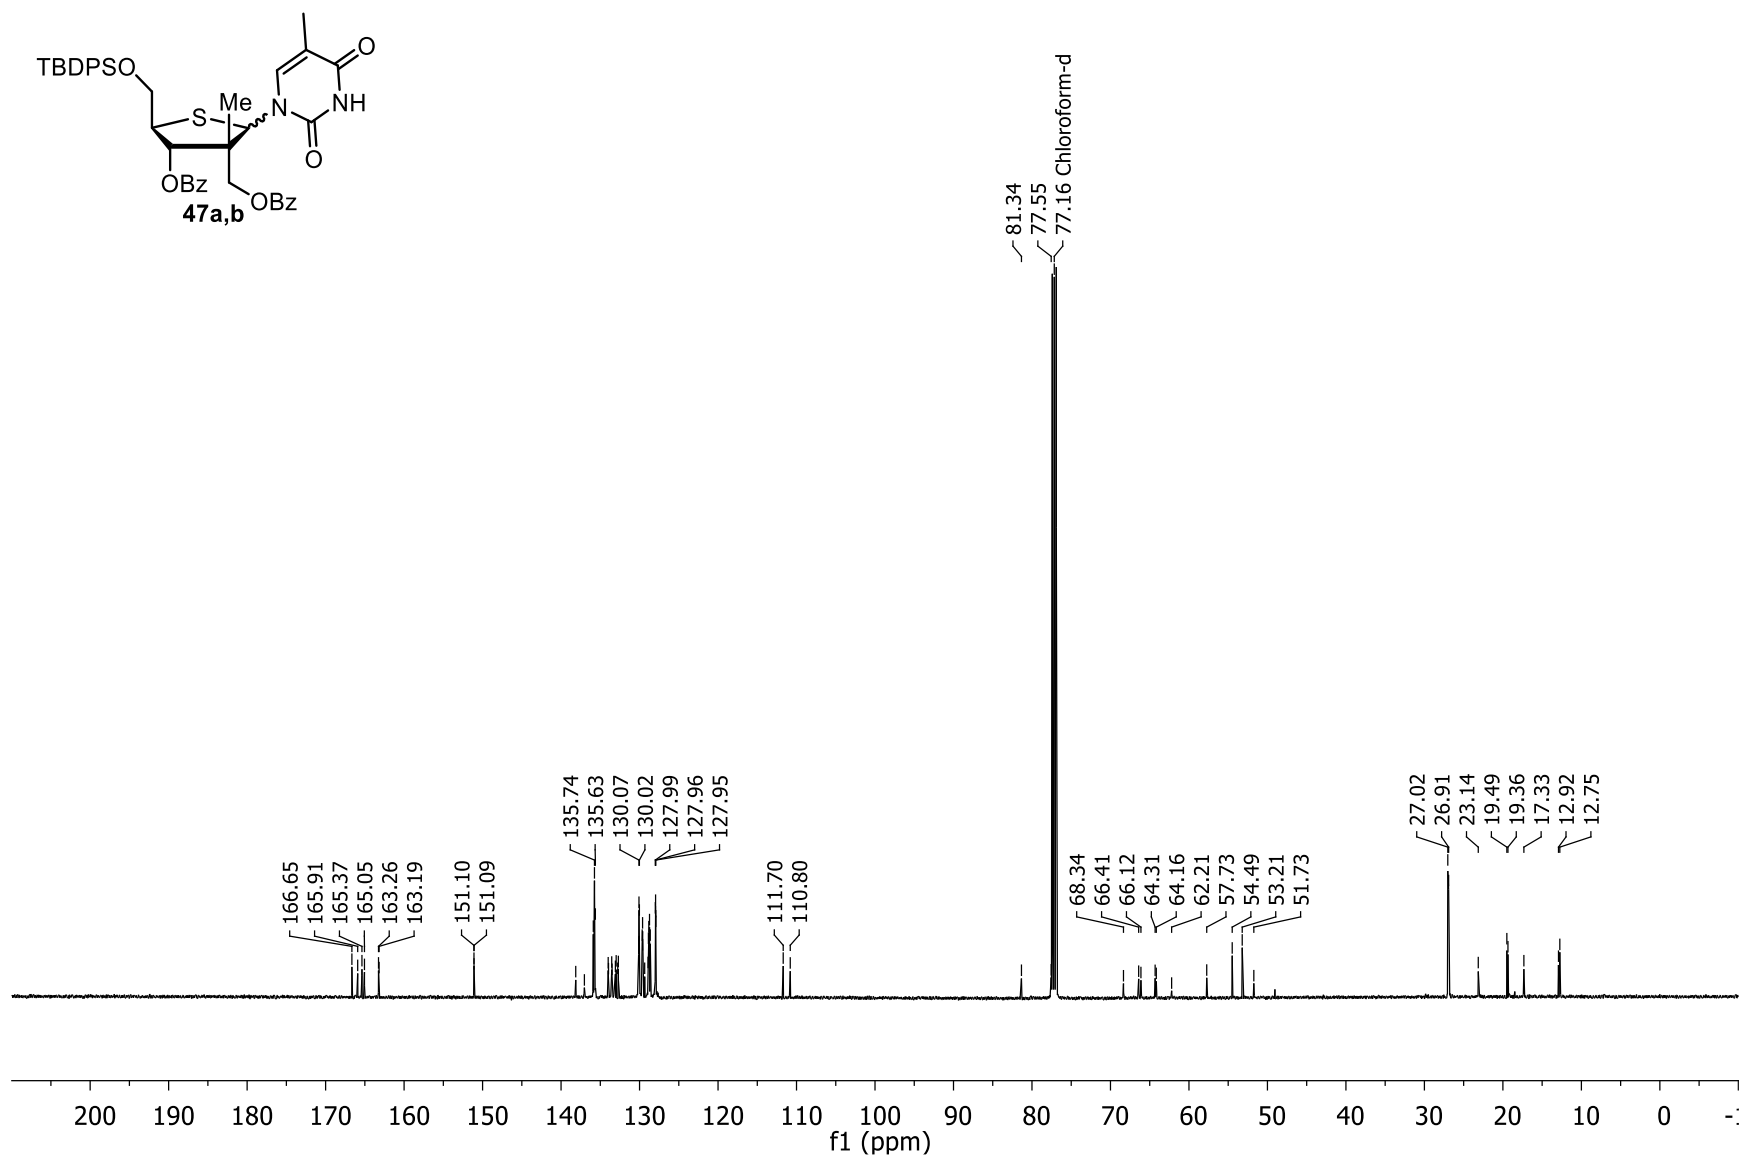

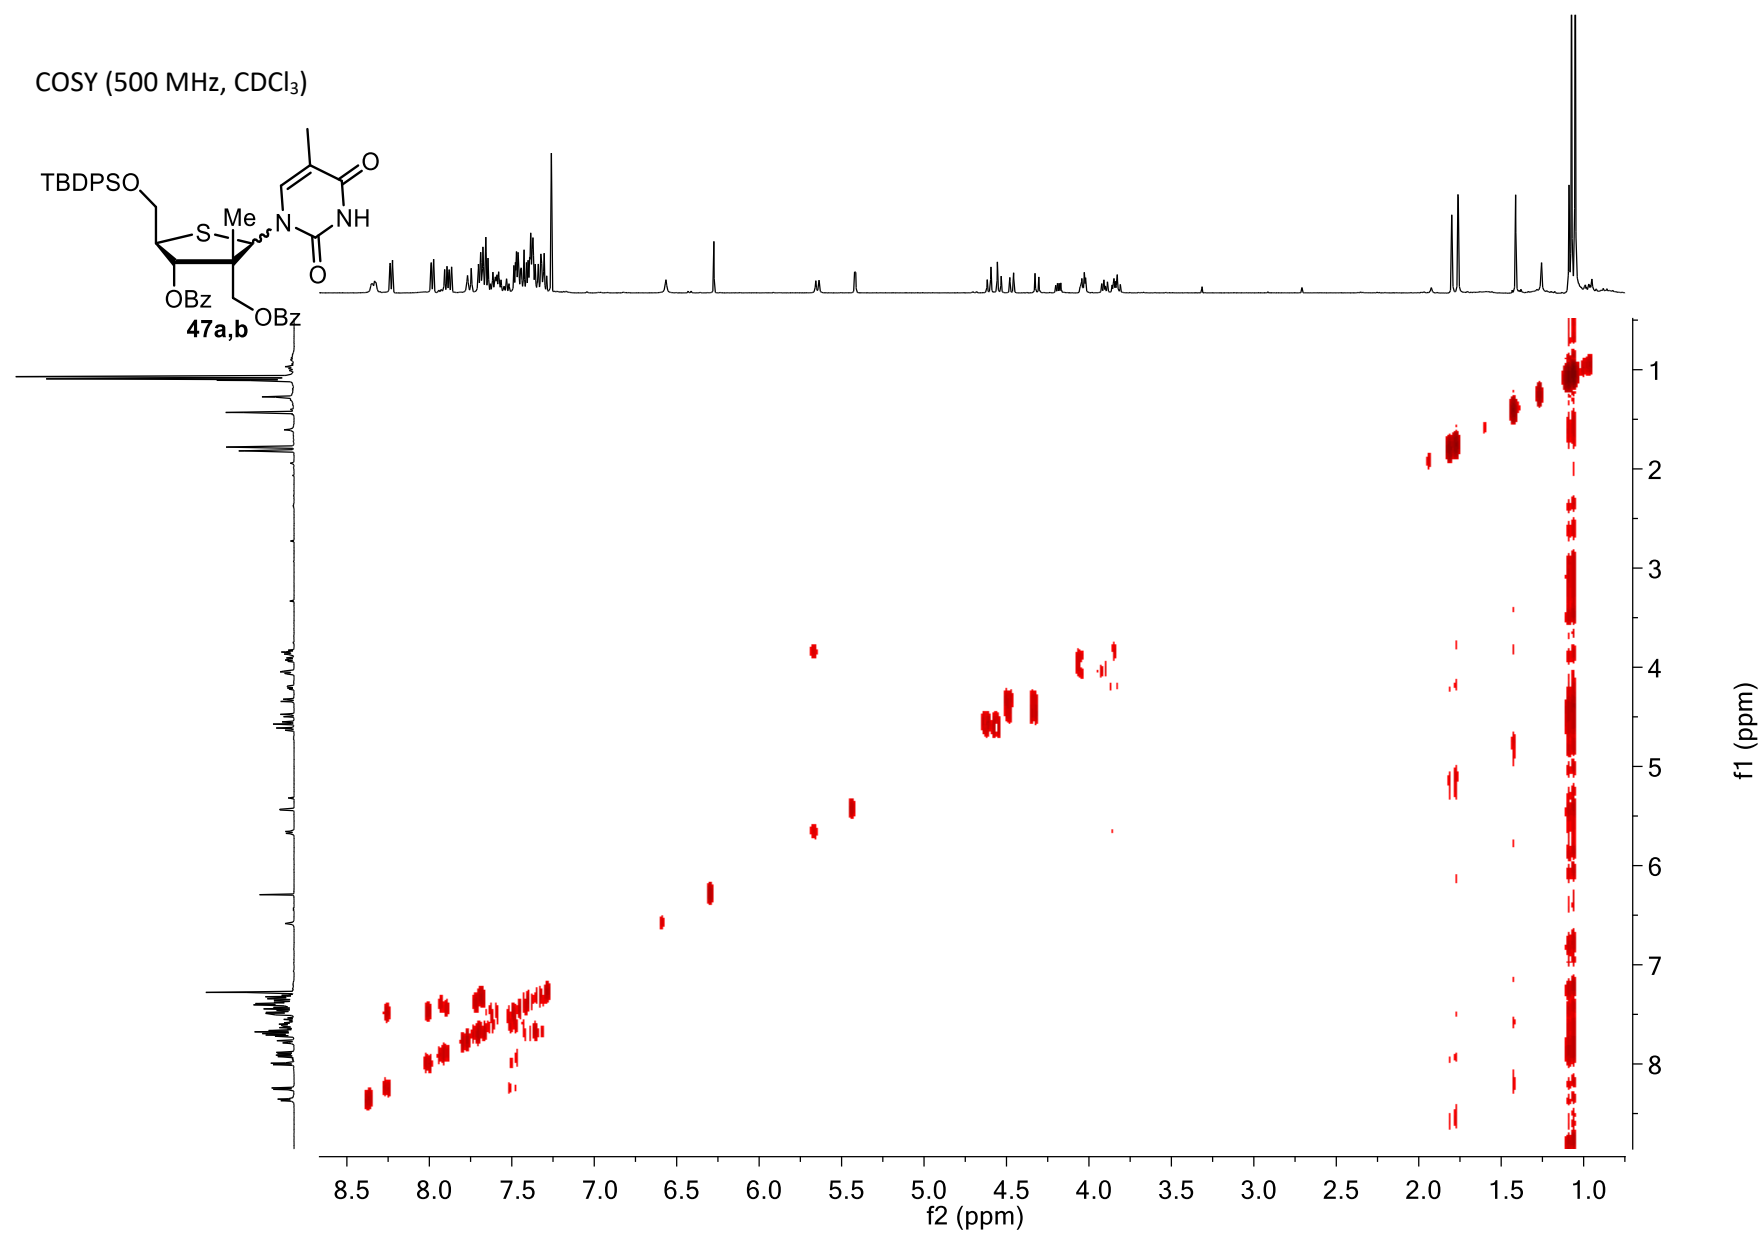

HSQC (500 MHz, CDCl<sub>3</sub>)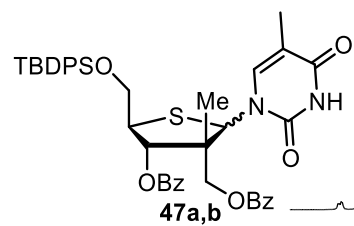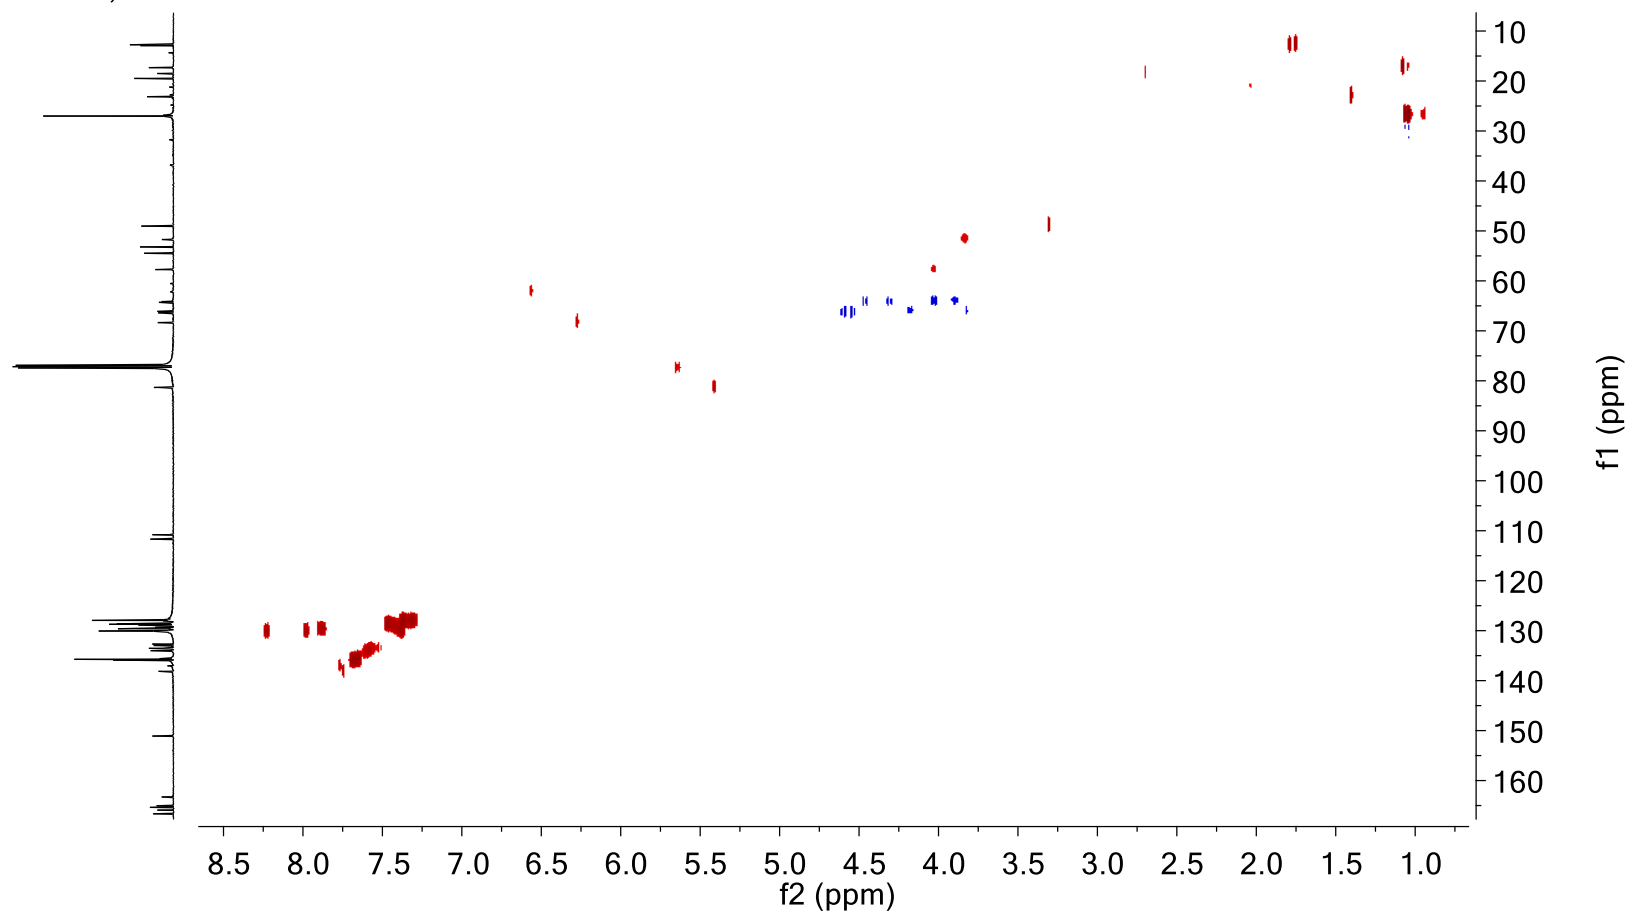

HMBC (500 MHz, CDCl<sub>3</sub>)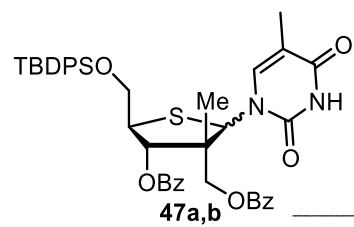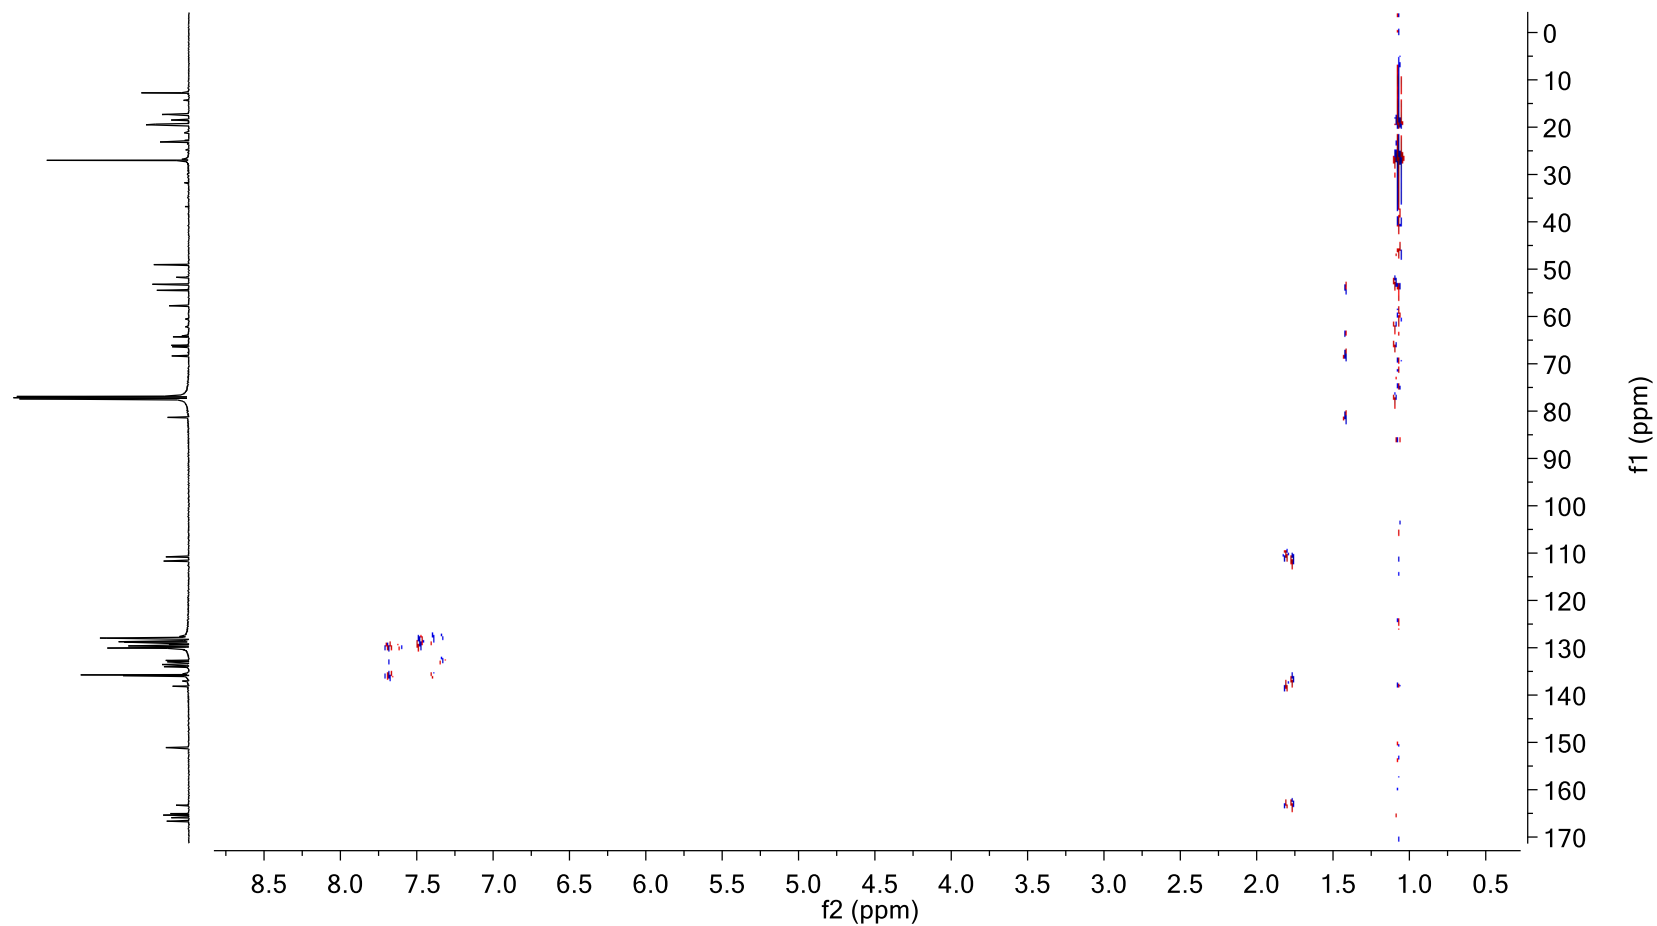

NOESY (500 MHz, CDCl<sub>3</sub>)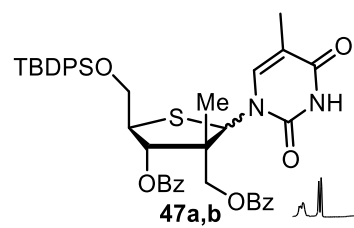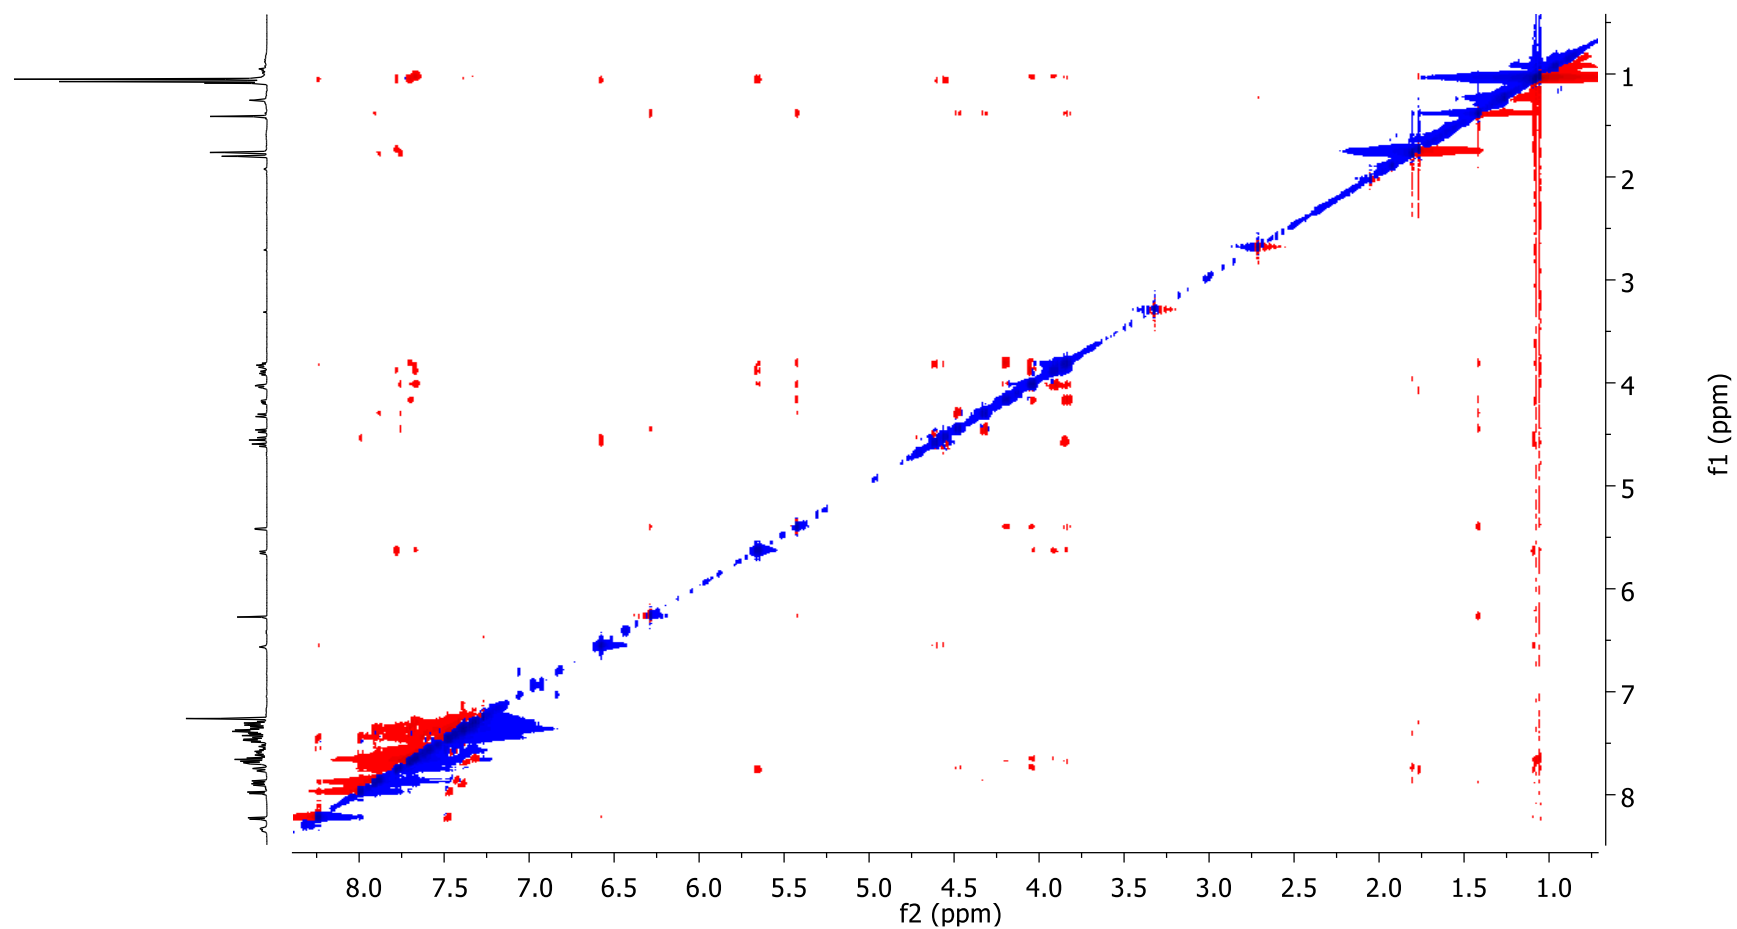

$^1\text{H}$ -NMR (500 MHz,  $\text{CDCl}_3$ )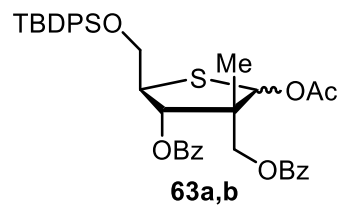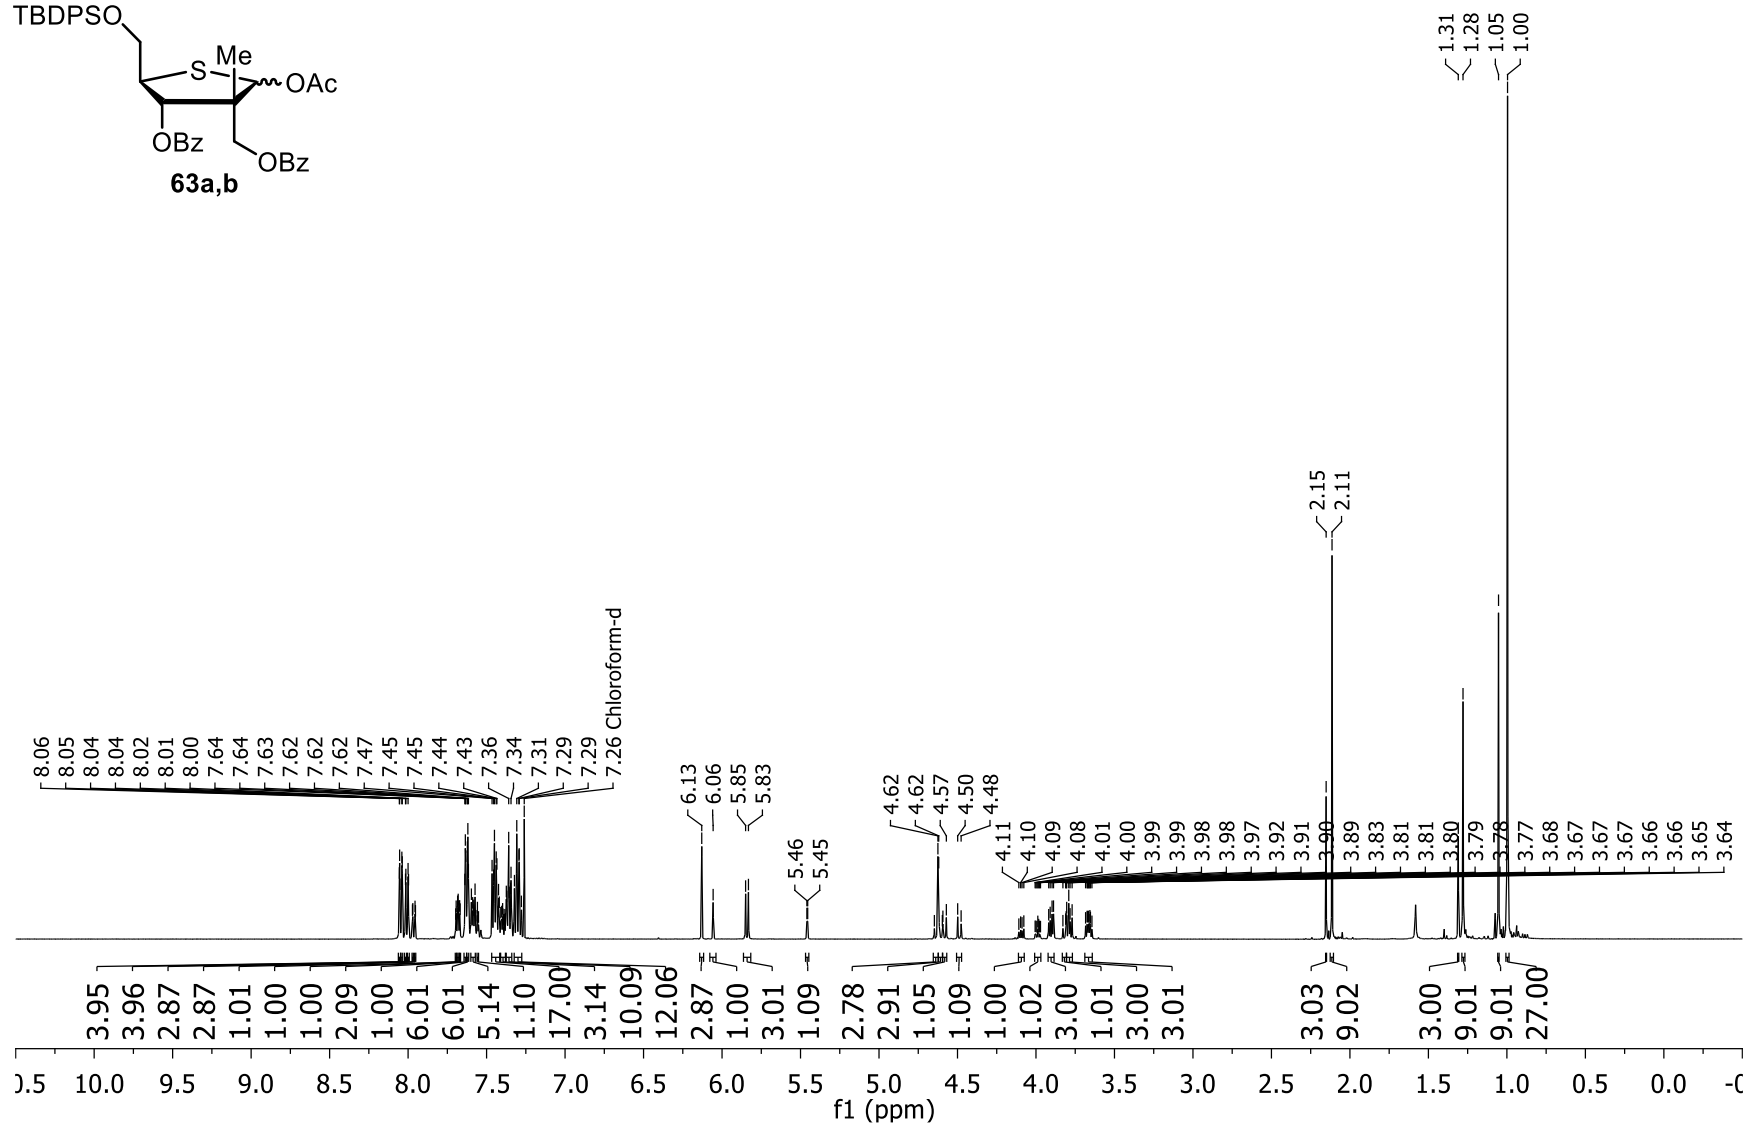

$^{13}\text{C}\{^1\text{H}\}$ -NMR (126 MHz,  $\text{CDCl}_3$ )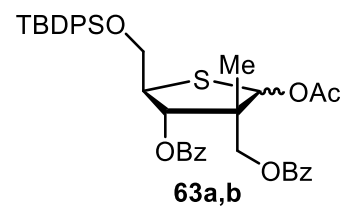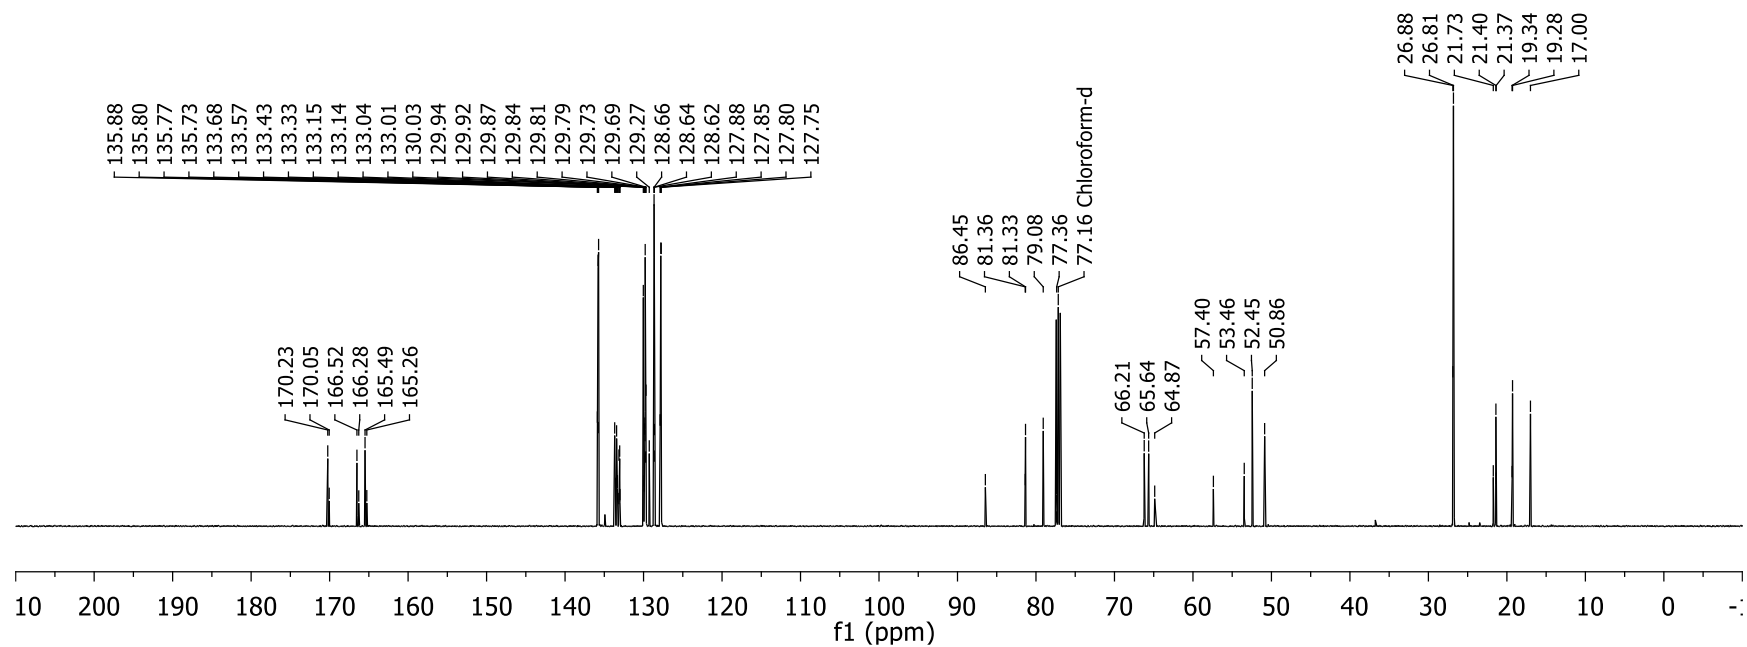

COSY (500 MHz, CDCl<sub>3</sub>)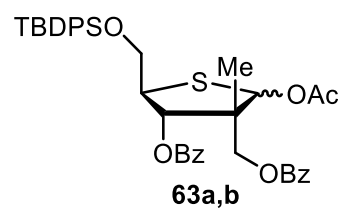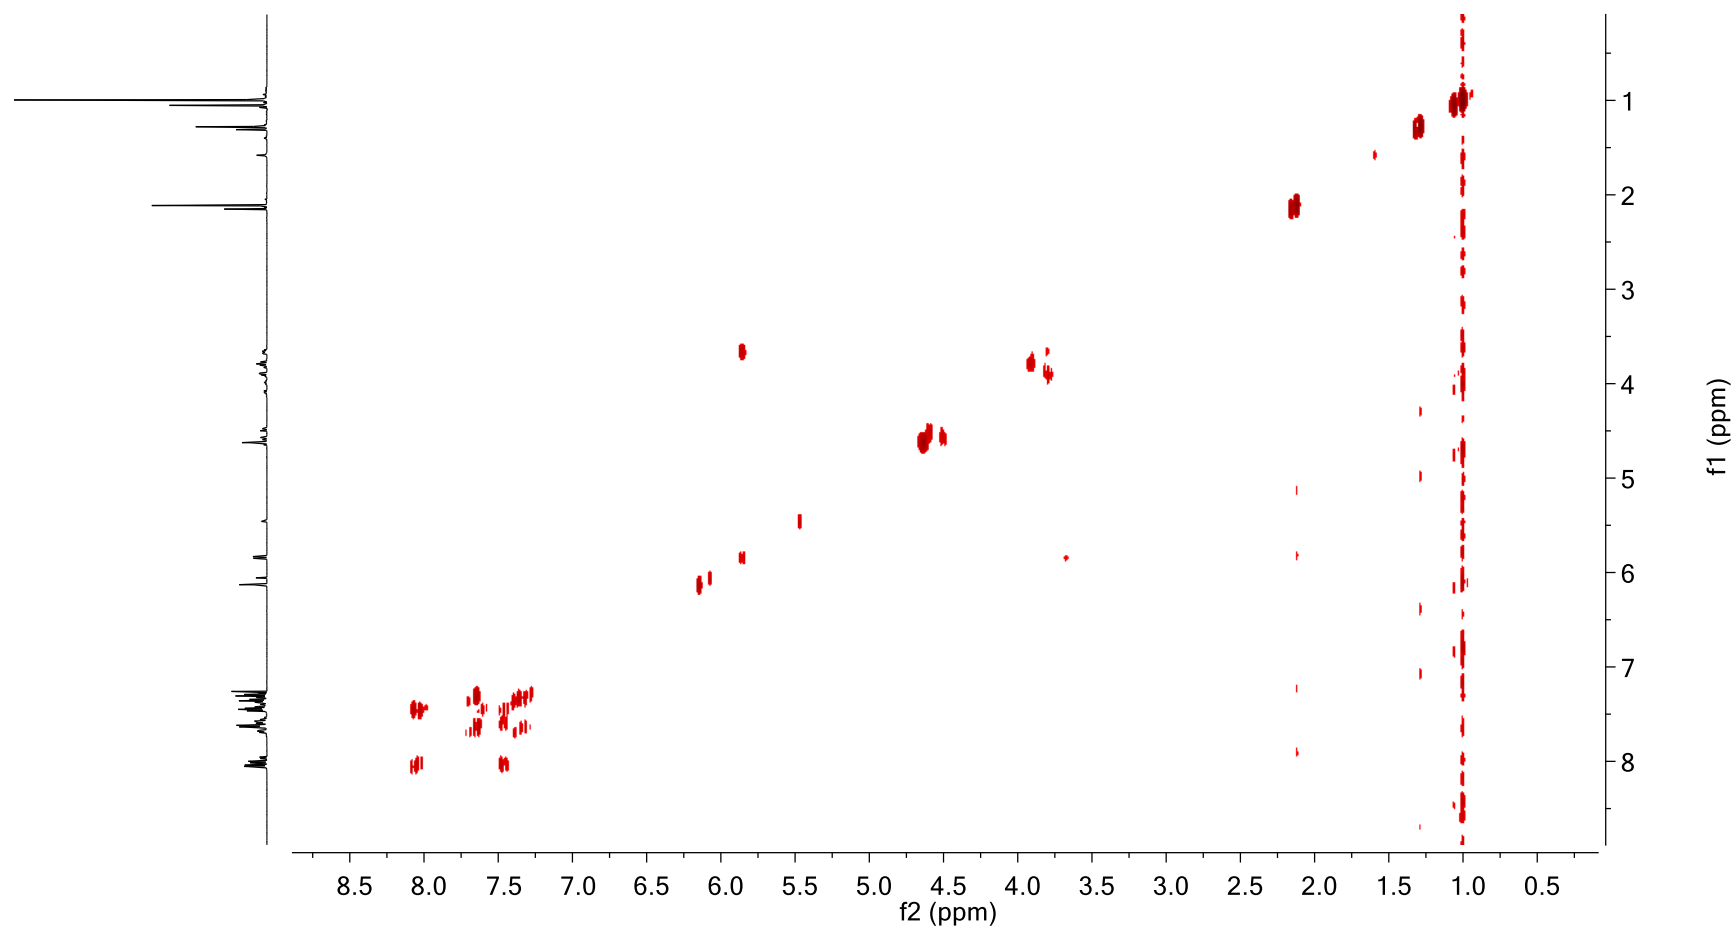



NOESY (500 MHz, CDCl<sub>3</sub>)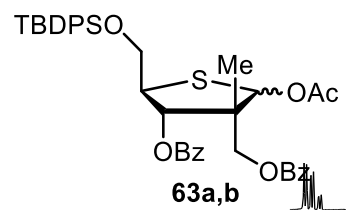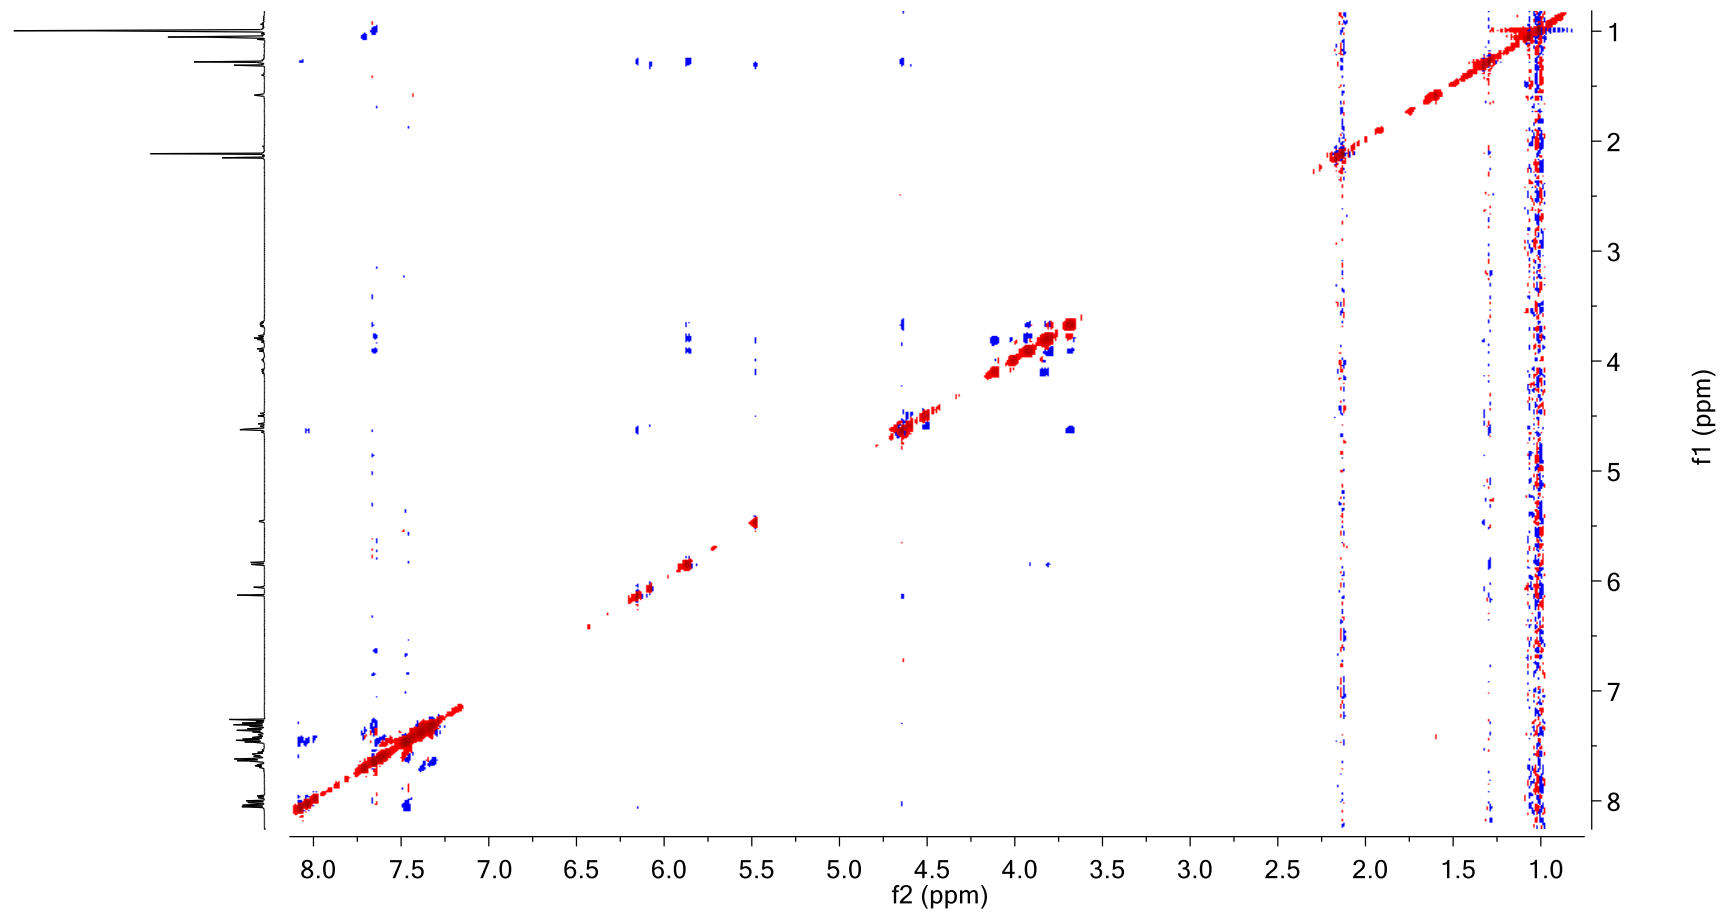

$^1\text{H}$ -NMR (500 MHz,  $\text{CDCl}_3$ )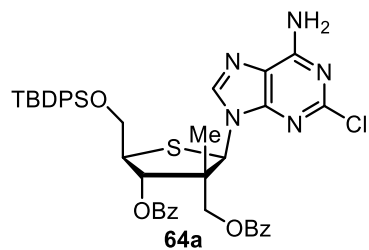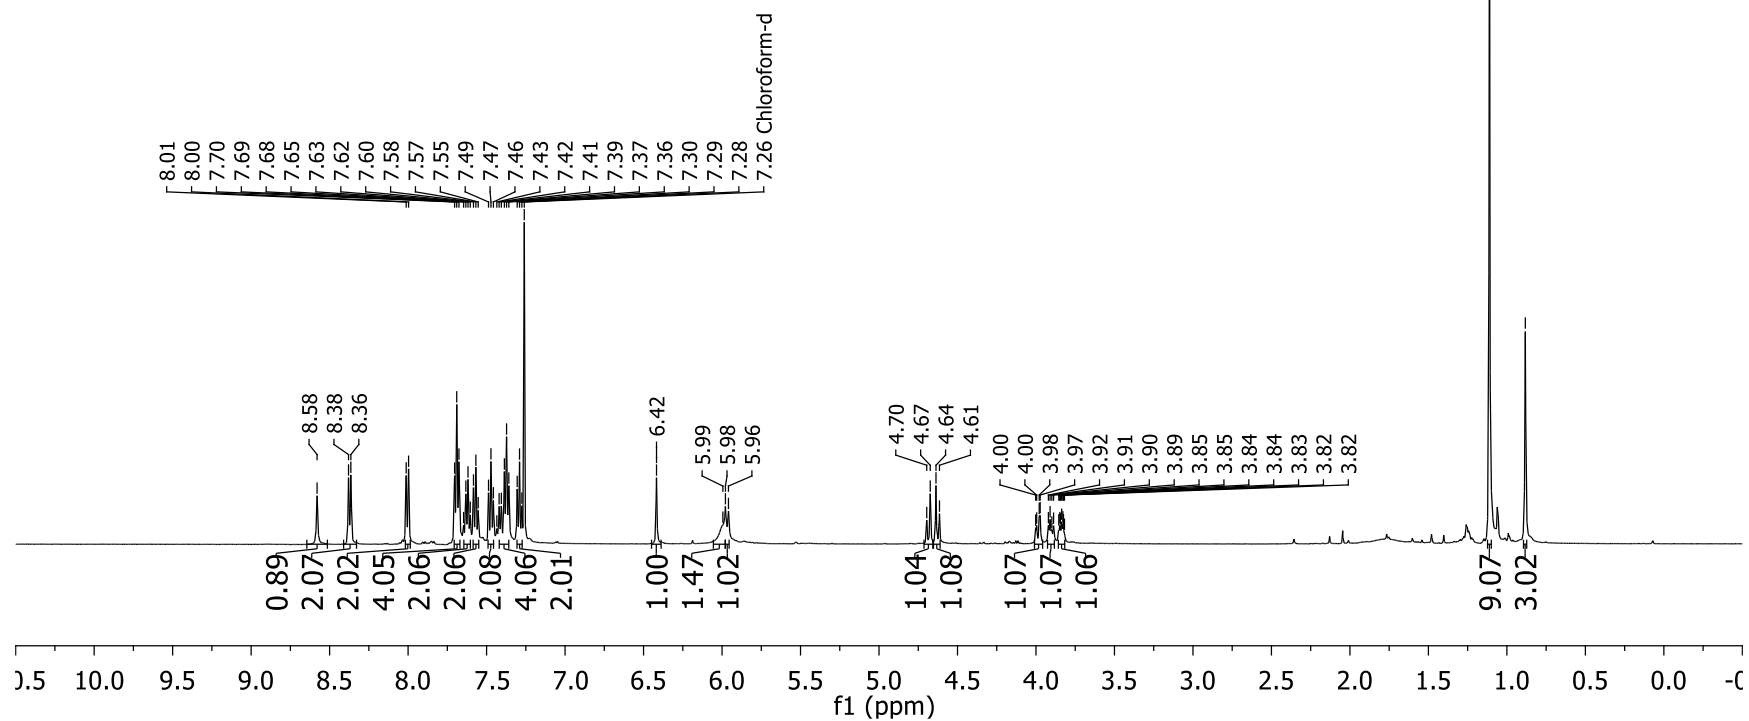

$^{13}\text{C}\{^1\text{H}\}$ -NMR (126 MHz,  $\text{CDCl}_3$ )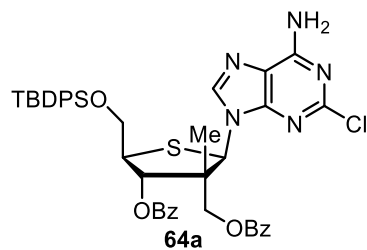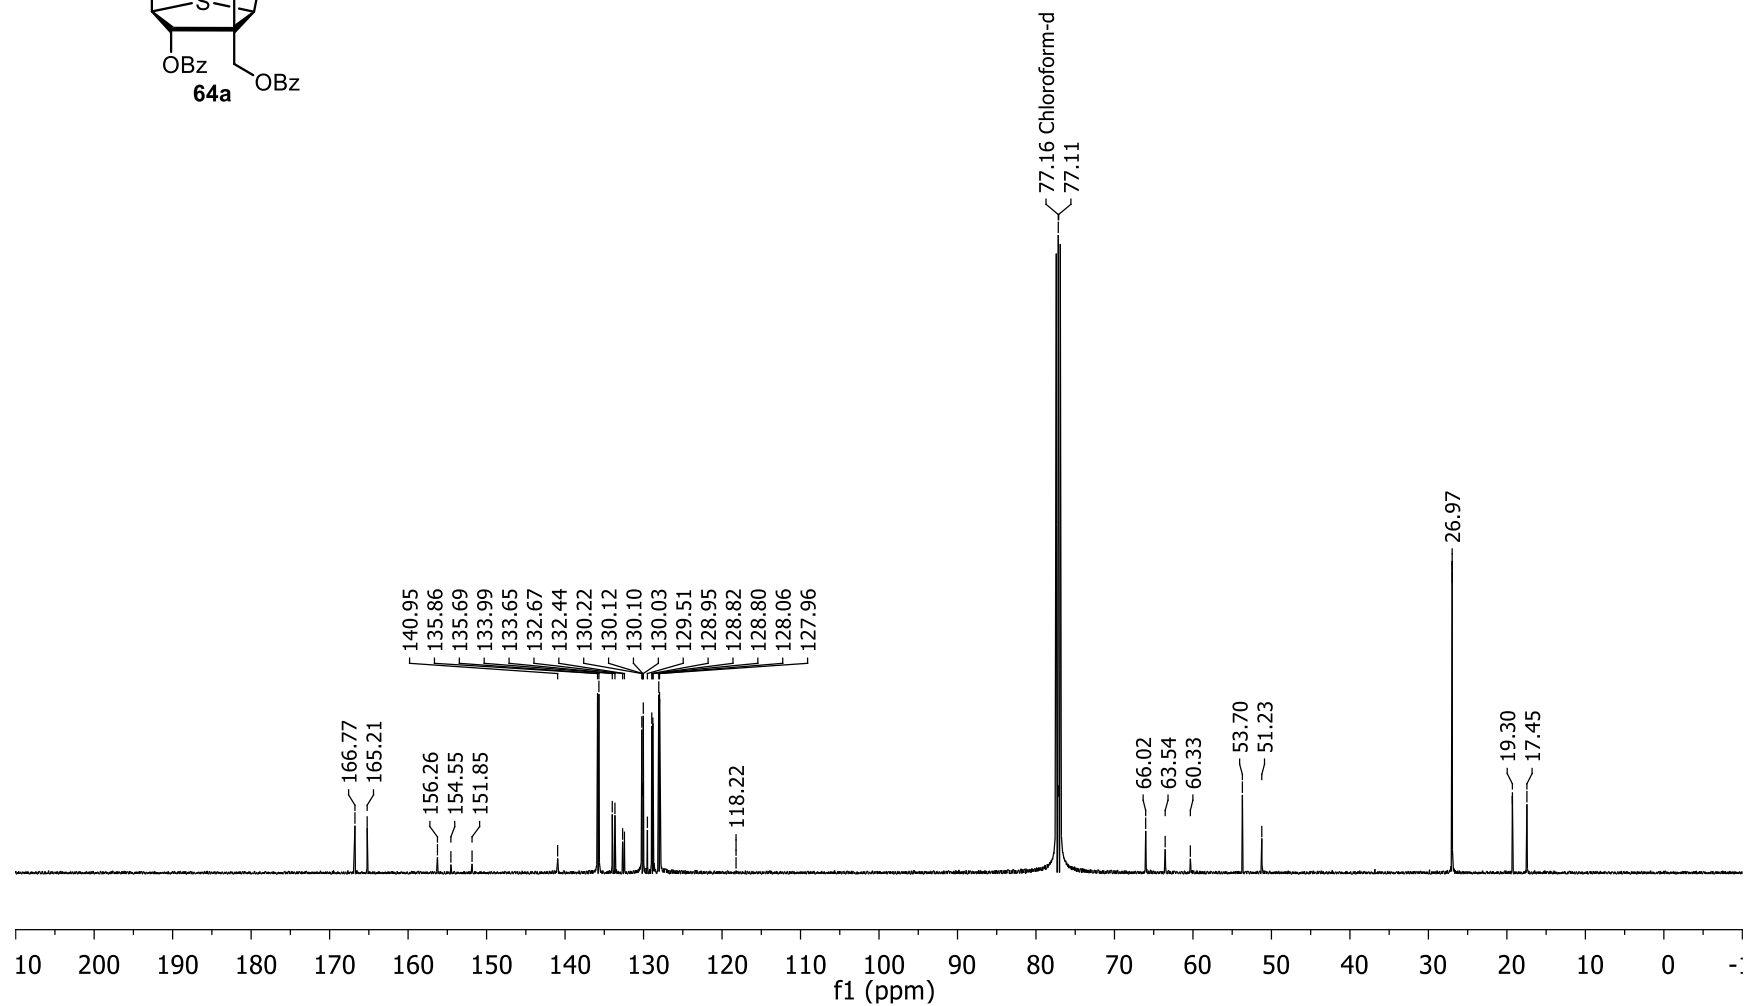

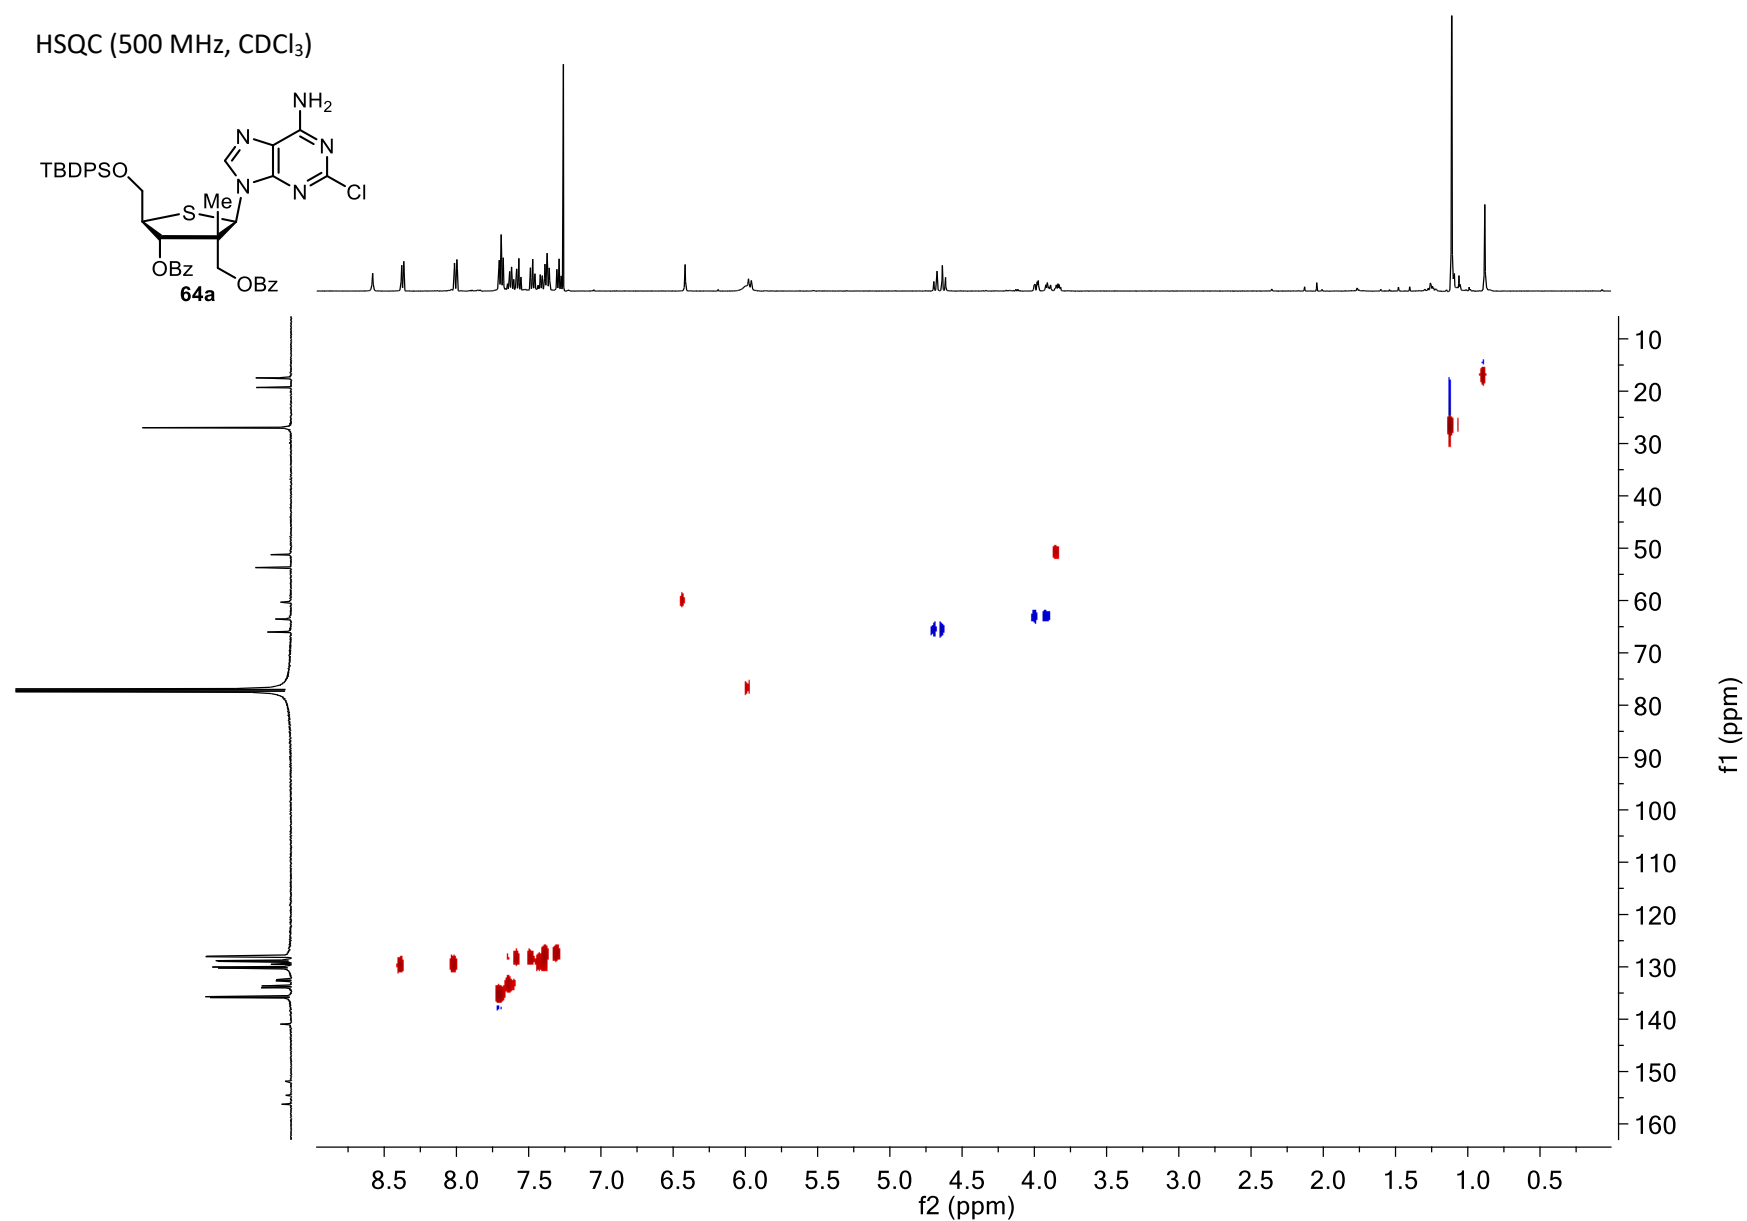

HMBC (500 MHz, CDCl<sub>3</sub>)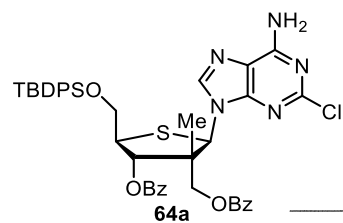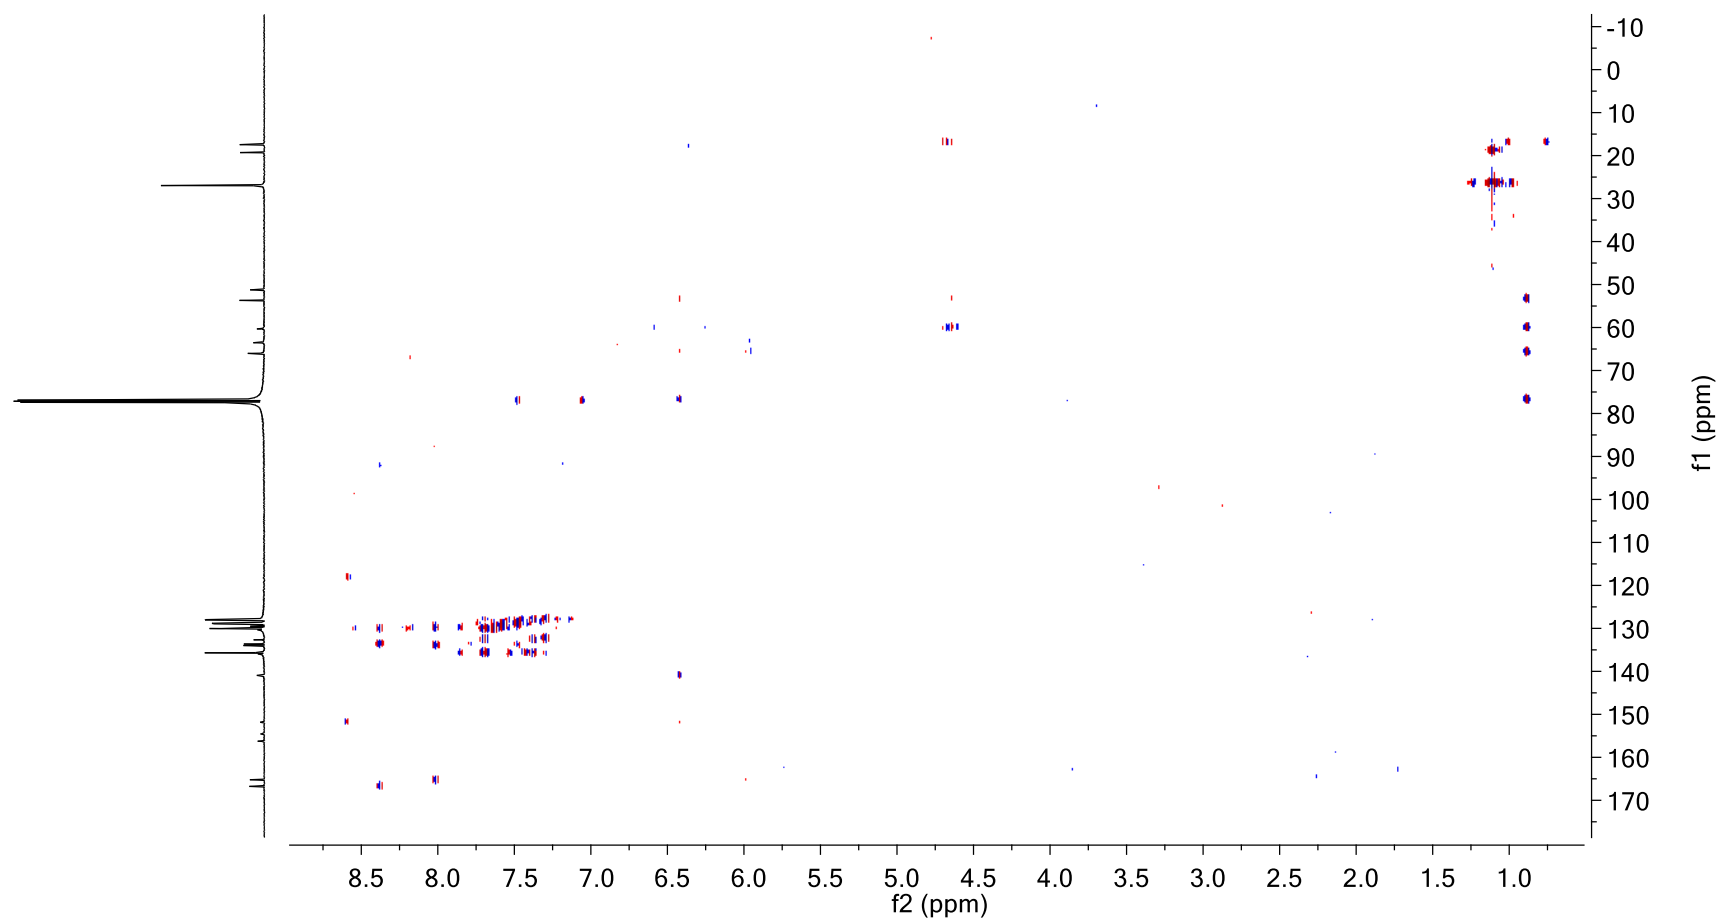

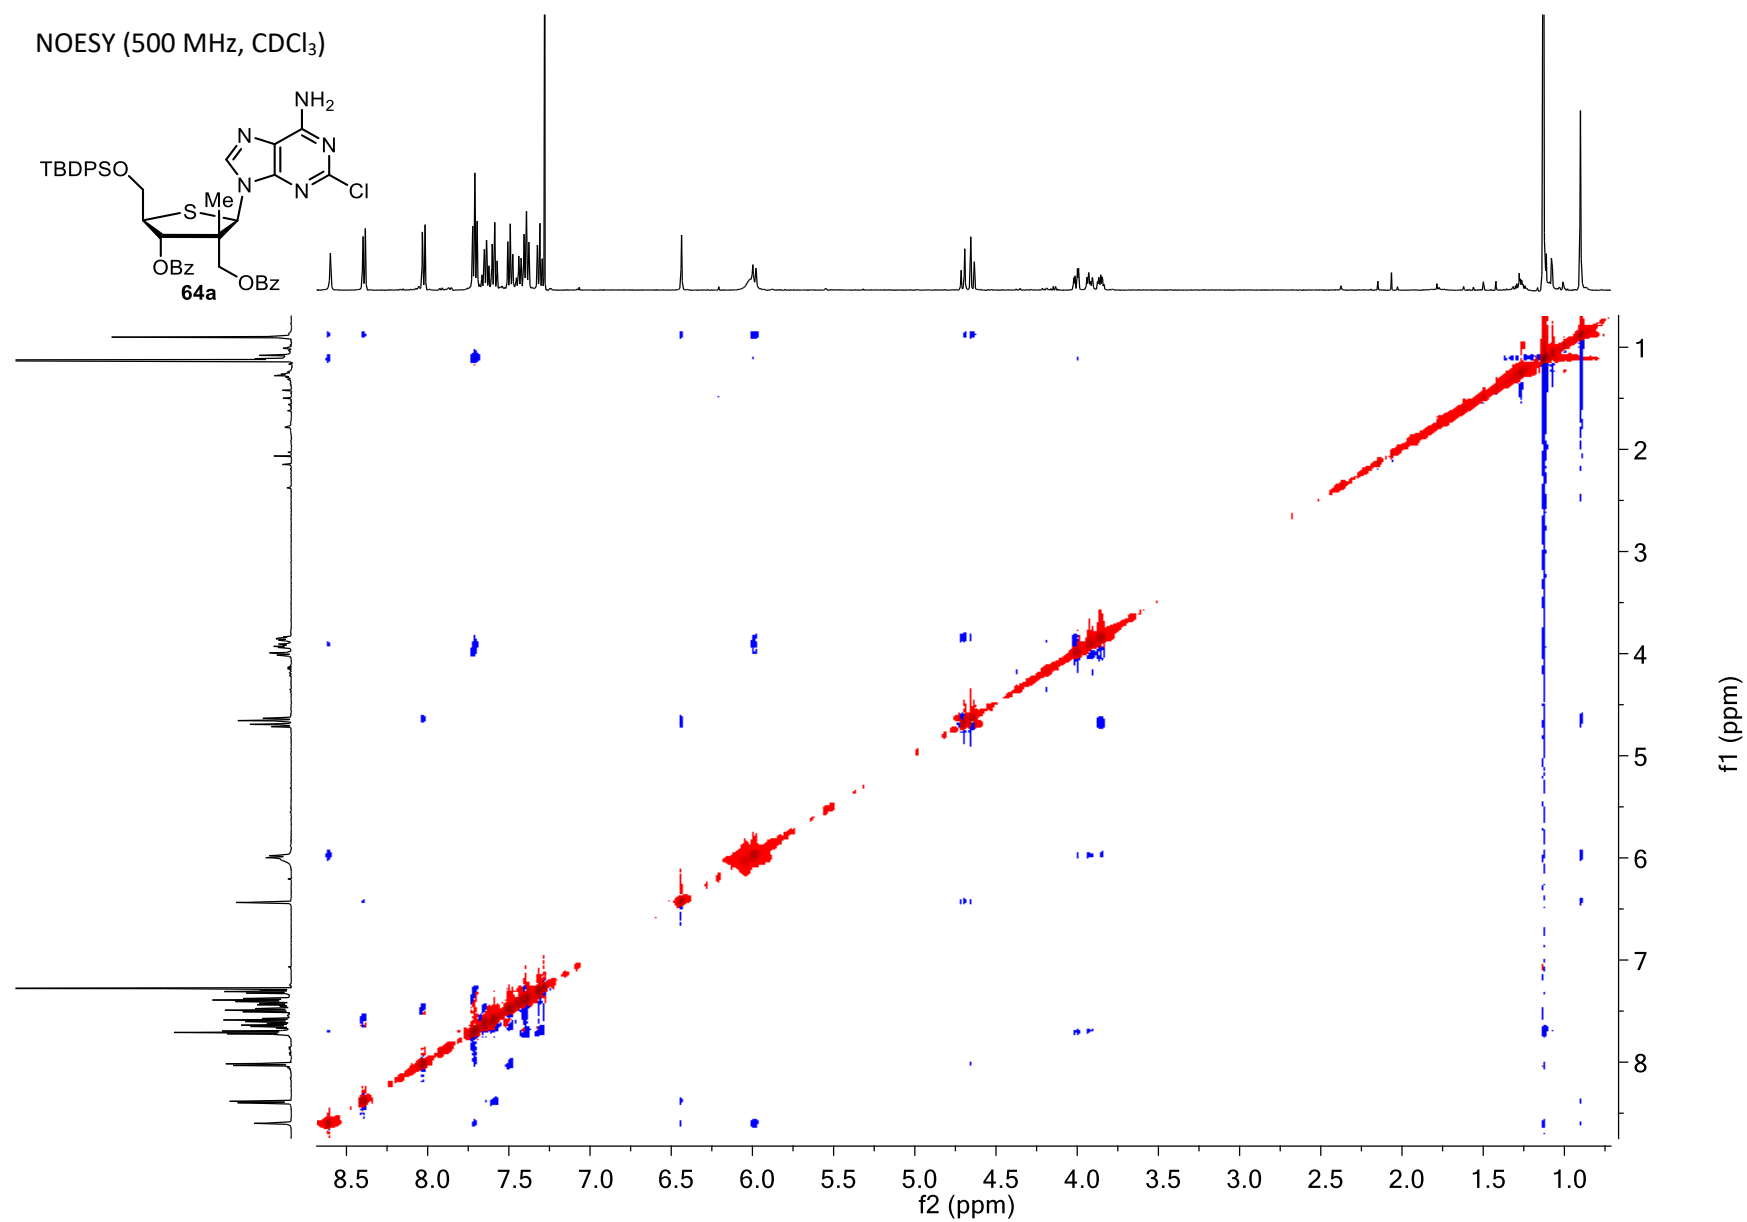

$^1\text{H}$ -NMR (500 MHz,  $\text{CDCl}_3$ )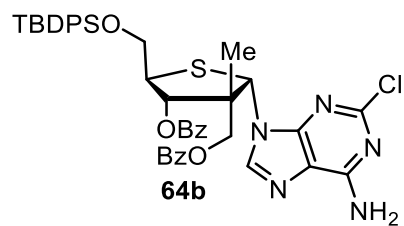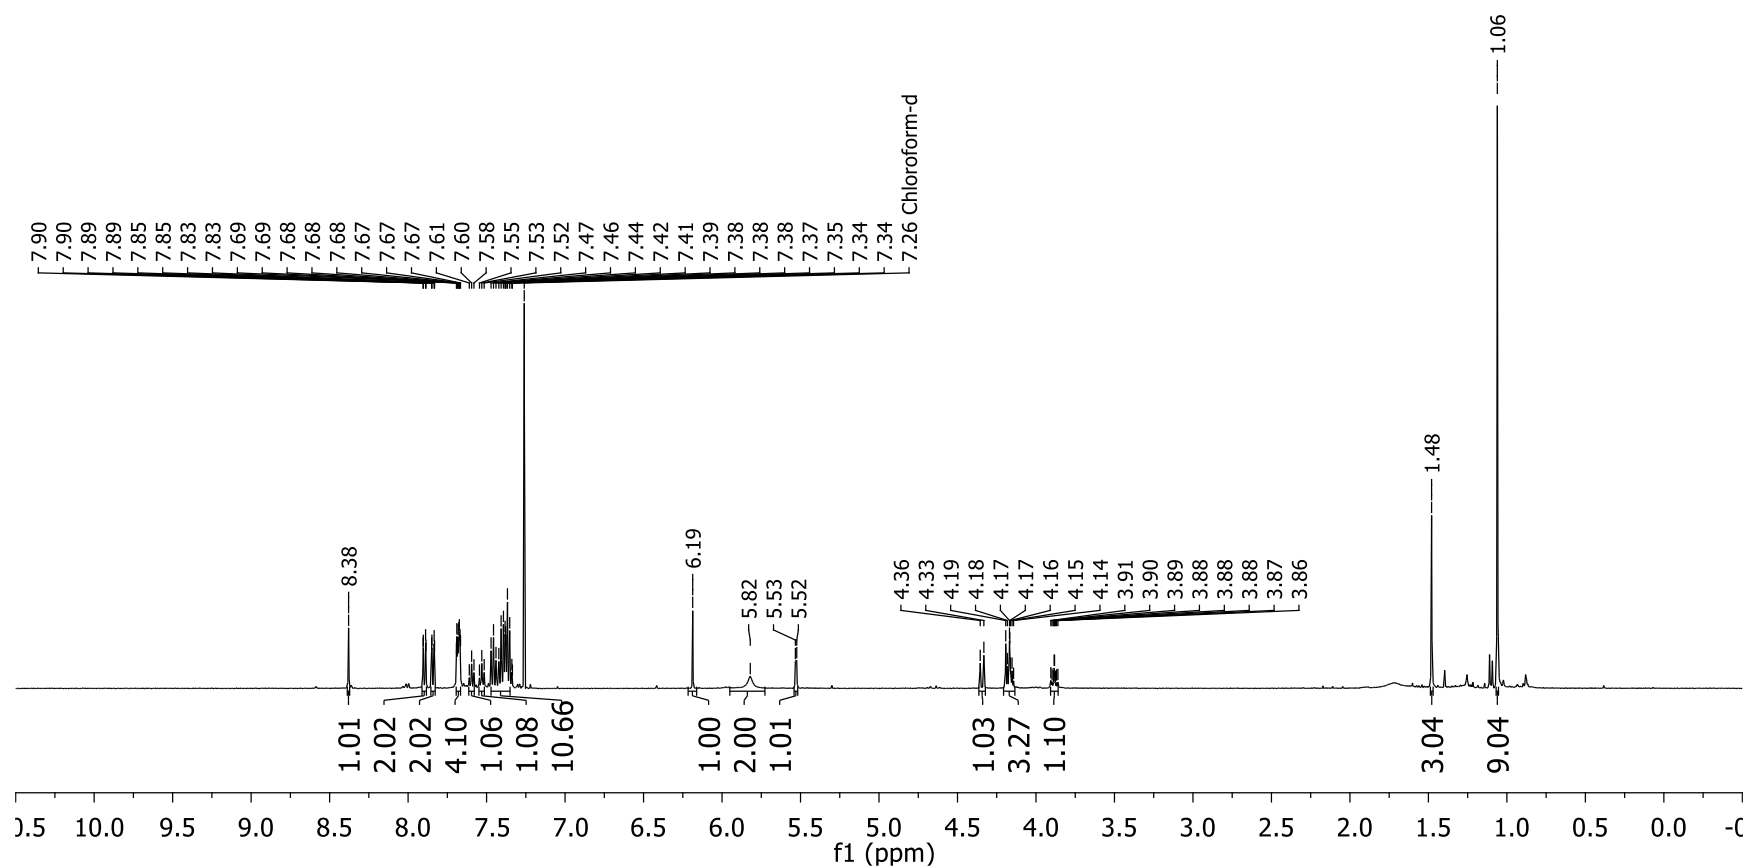

$^{13}\text{C}\{^1\text{H}\}$ -NMR (126 MHz,  $\text{CDCl}_3$ )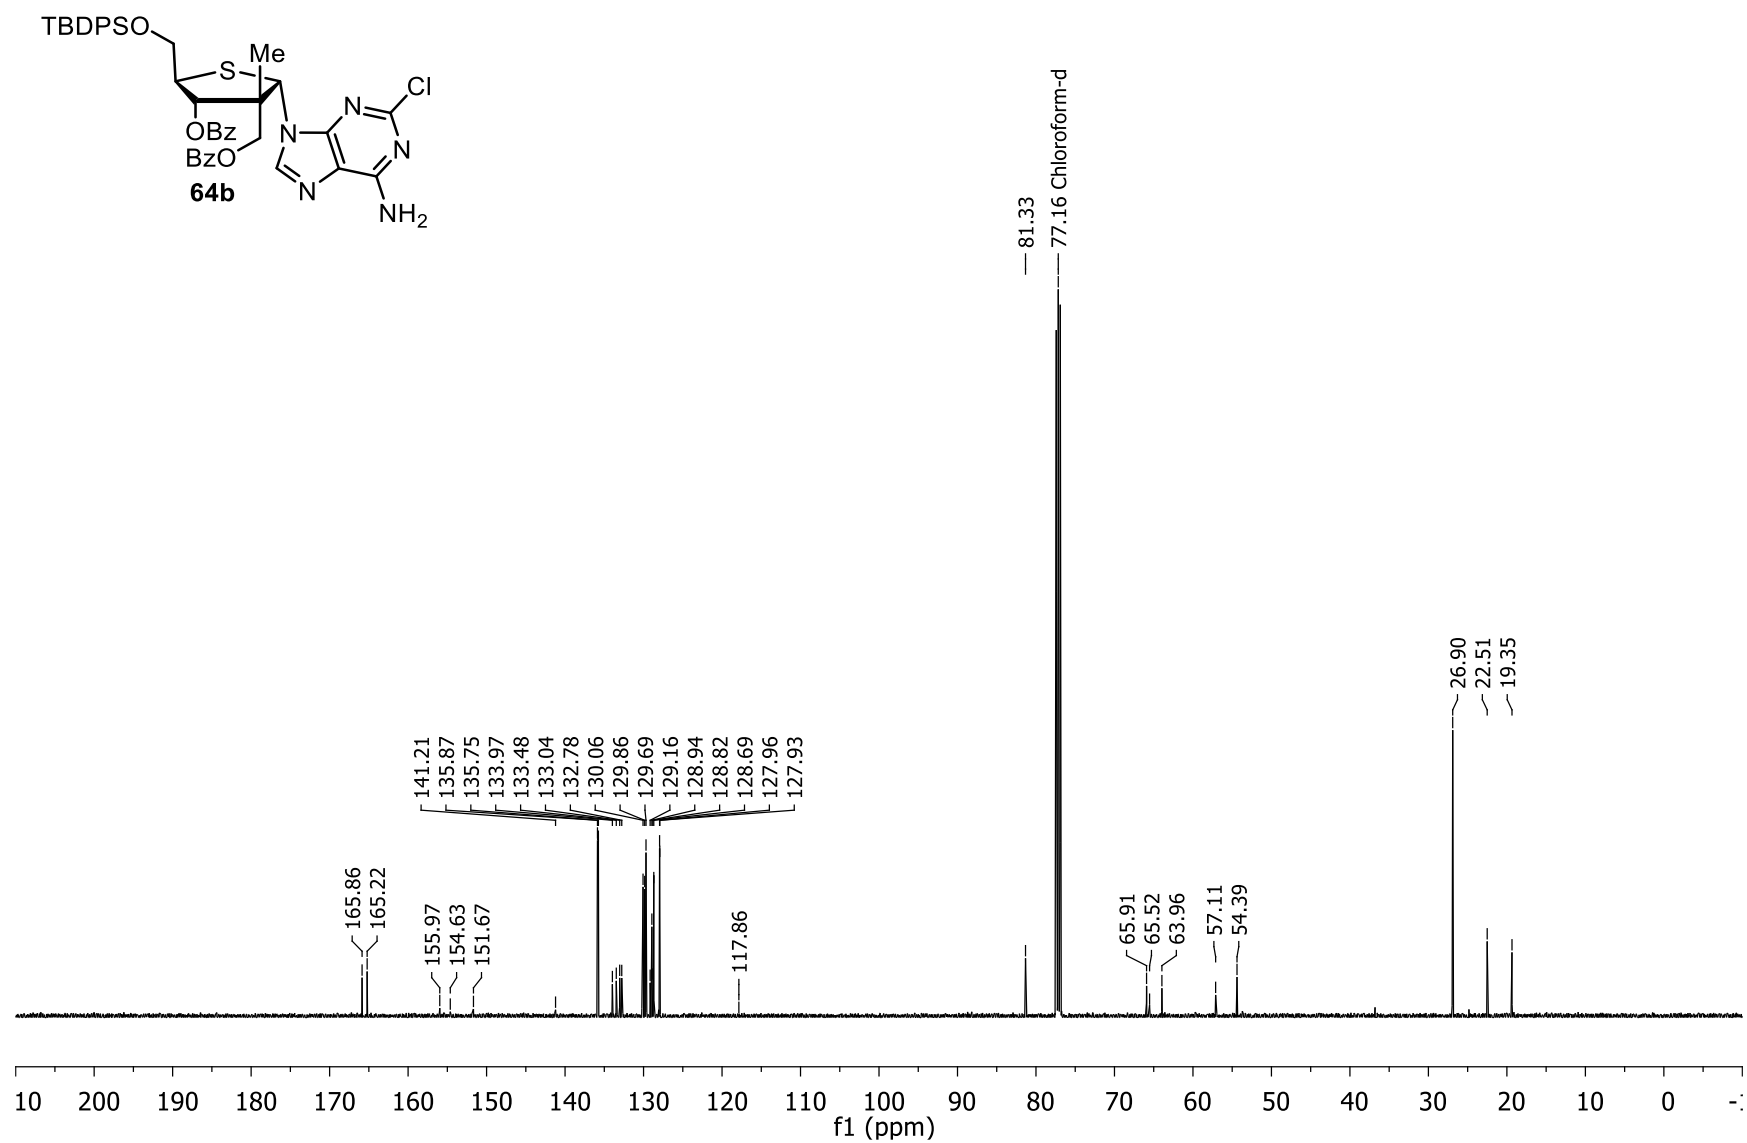



HSQC (500 MHz, CDCl<sub>3</sub>)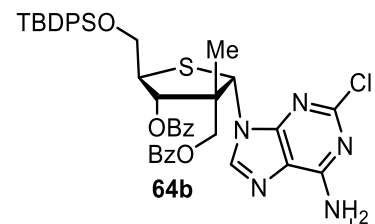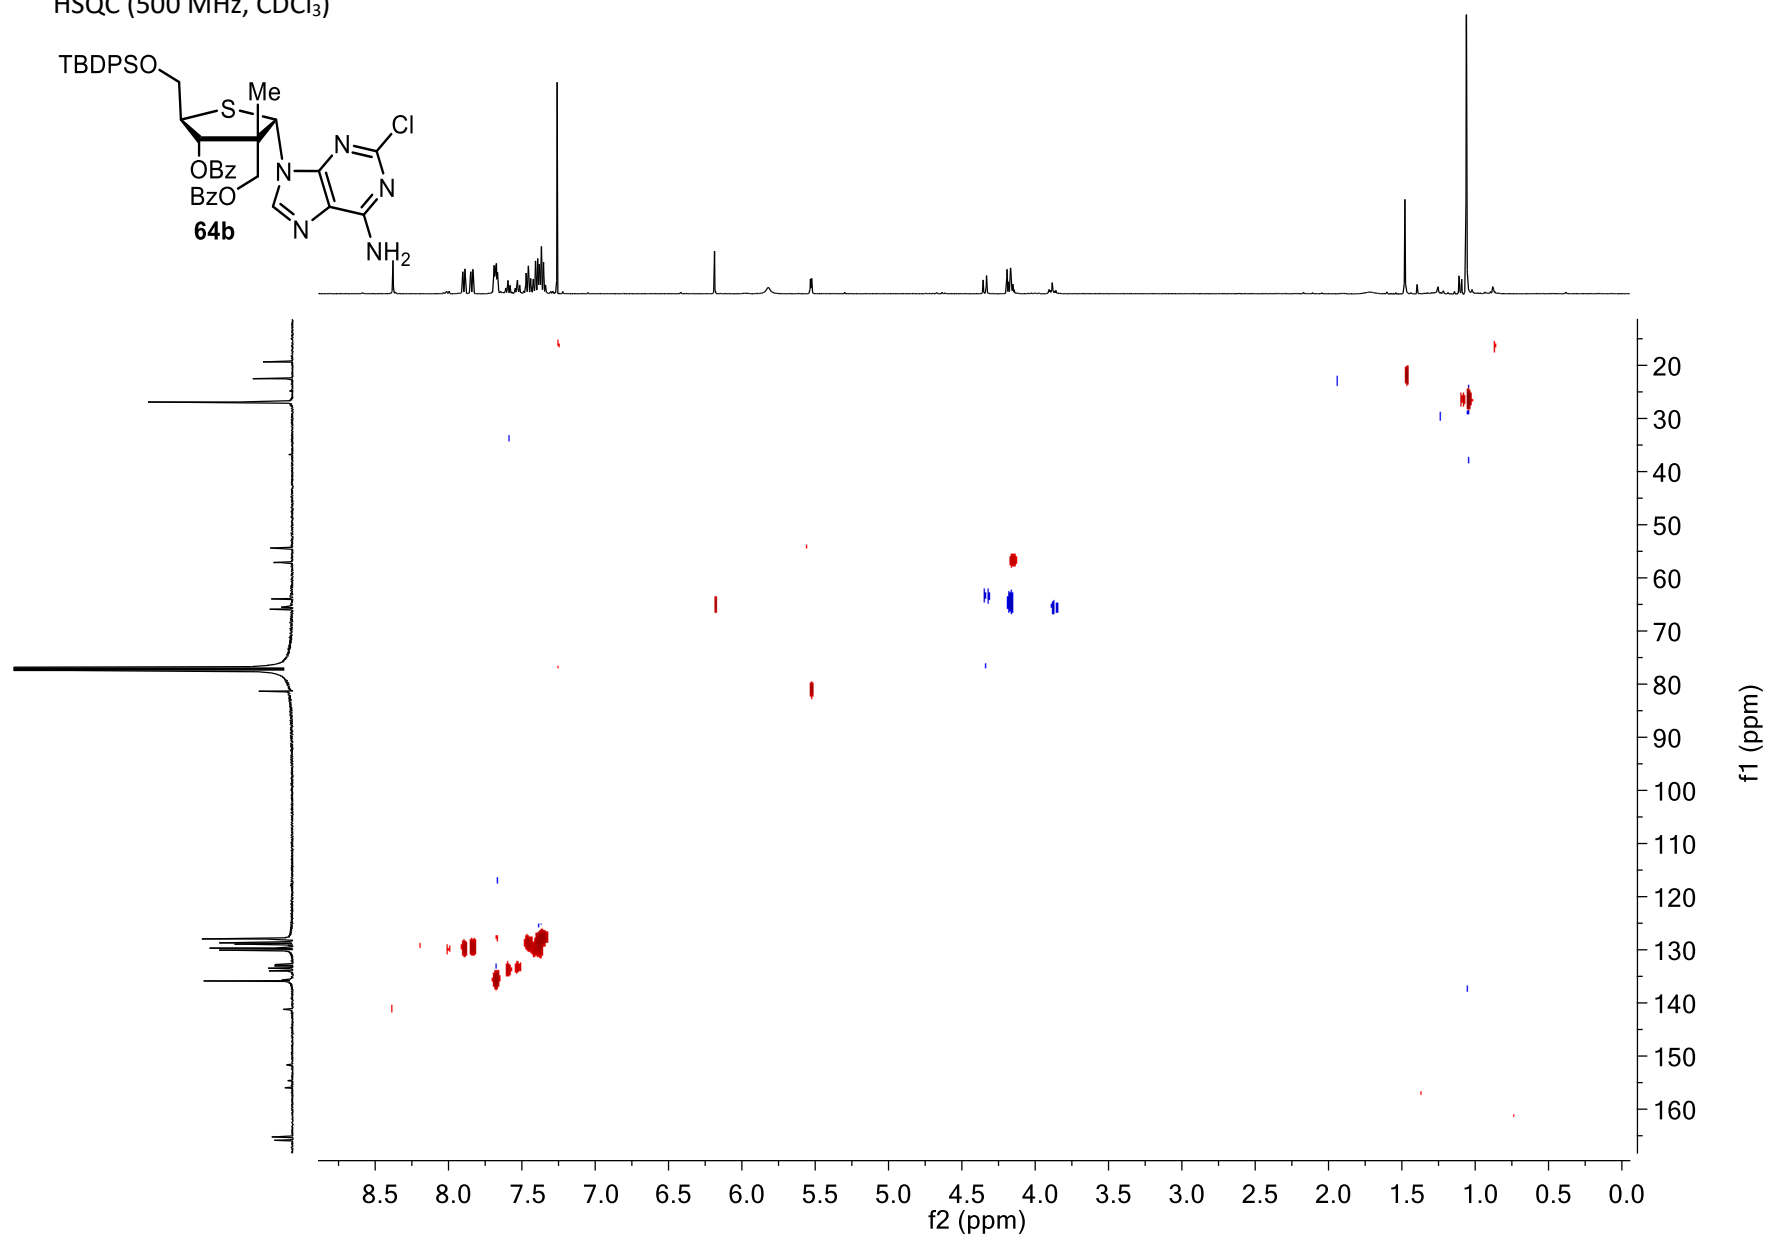

HMBC (500 MHz, CDCl<sub>3</sub>)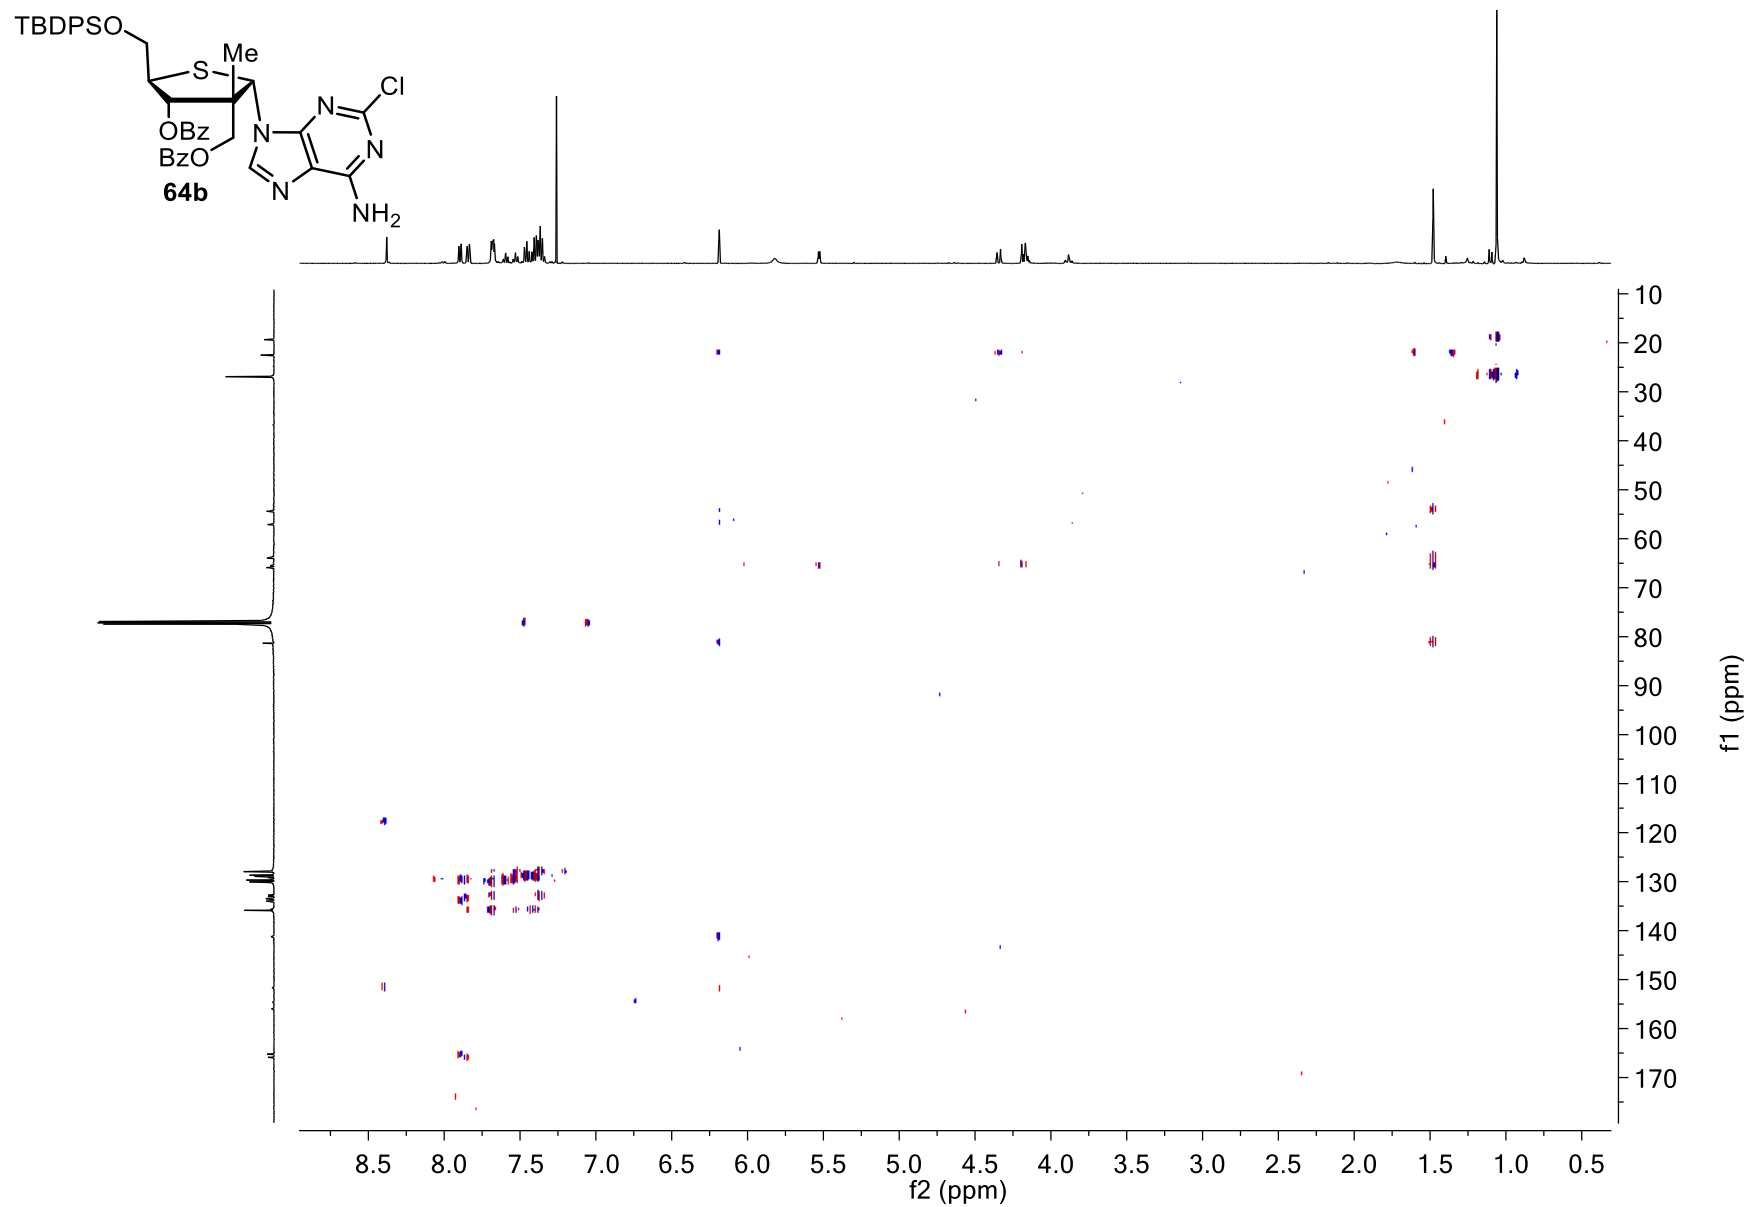

NOESY (500 MHz, CDCl<sub>3</sub>)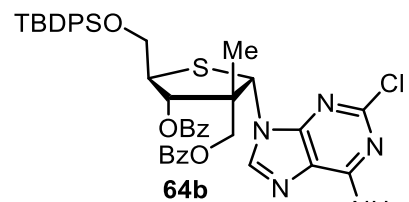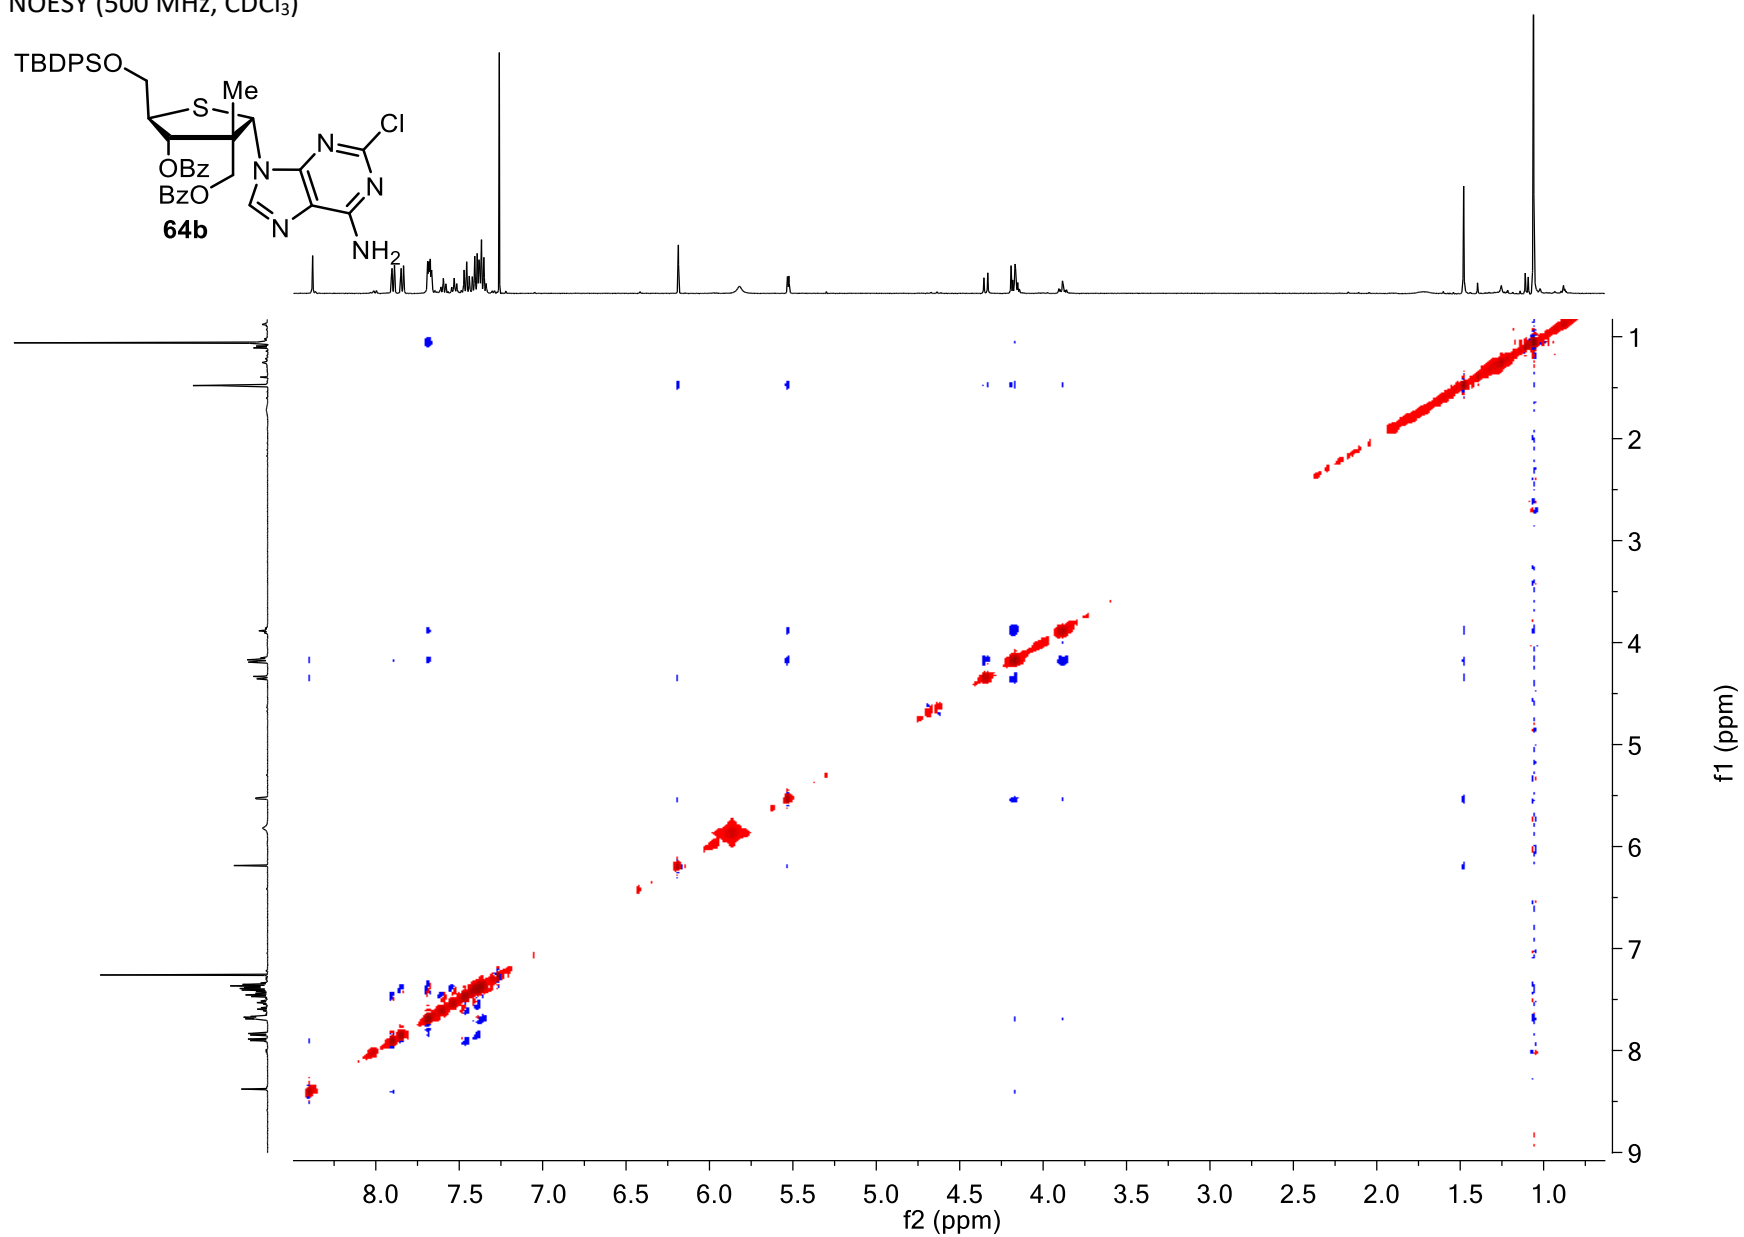

$^1\text{H}$ -NMR (500 MHz,  $\text{CDCl}_3$ )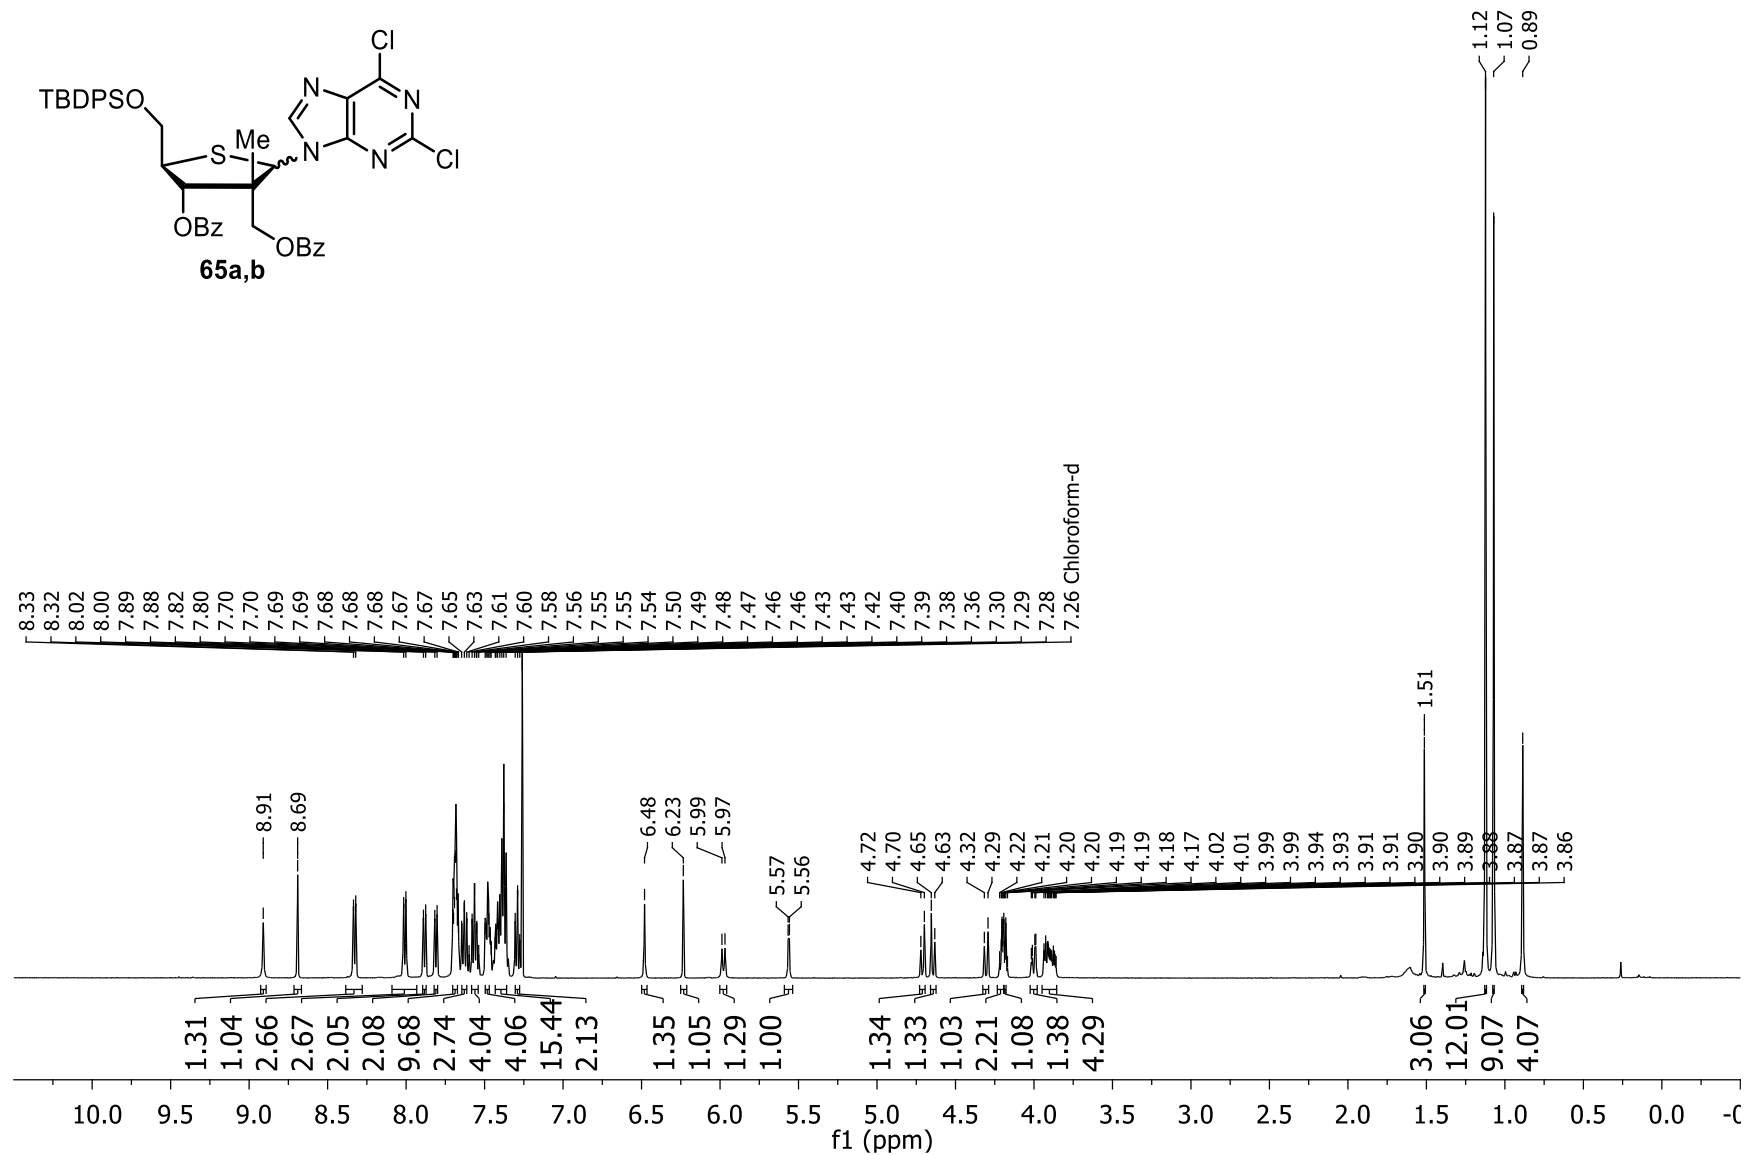

$^{13}\text{C}\{^1\text{H}\}$ -NMR (126 MHz,  $\text{CDCl}_3$ )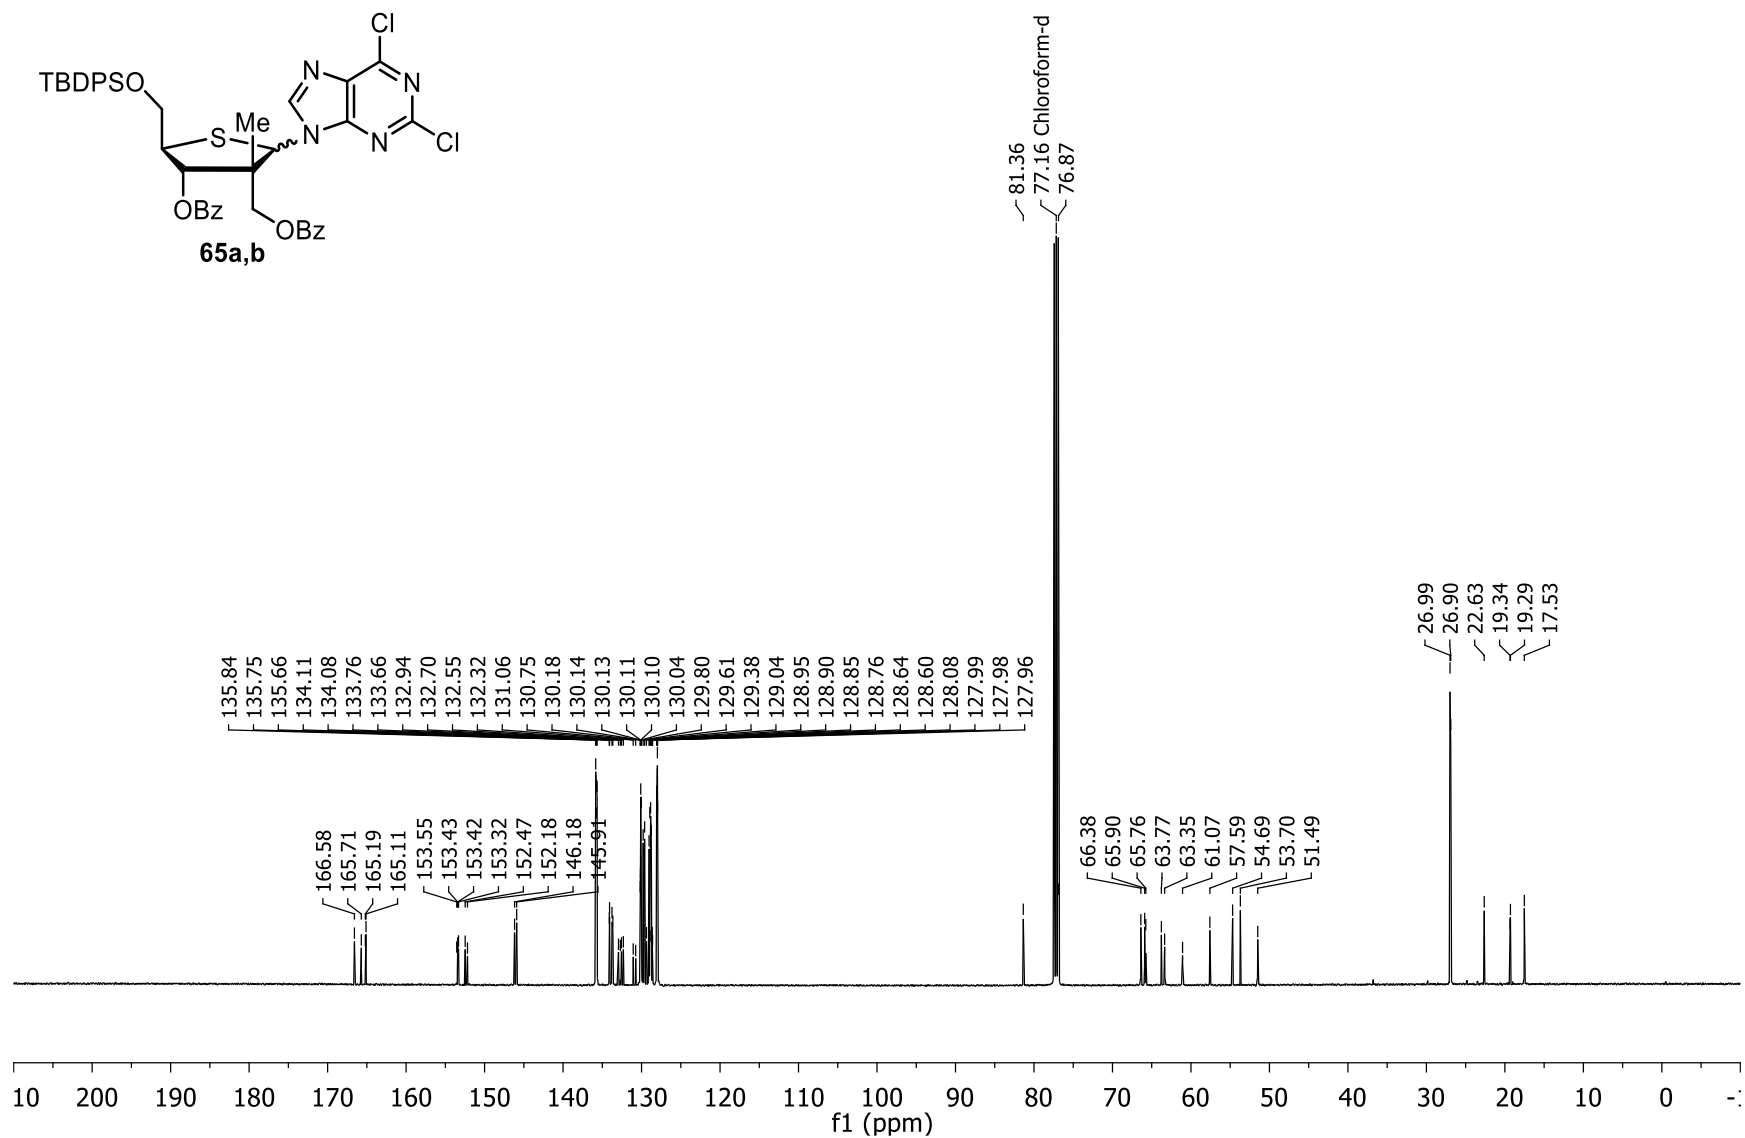

COSY (500 MHz, CDCl<sub>3</sub>)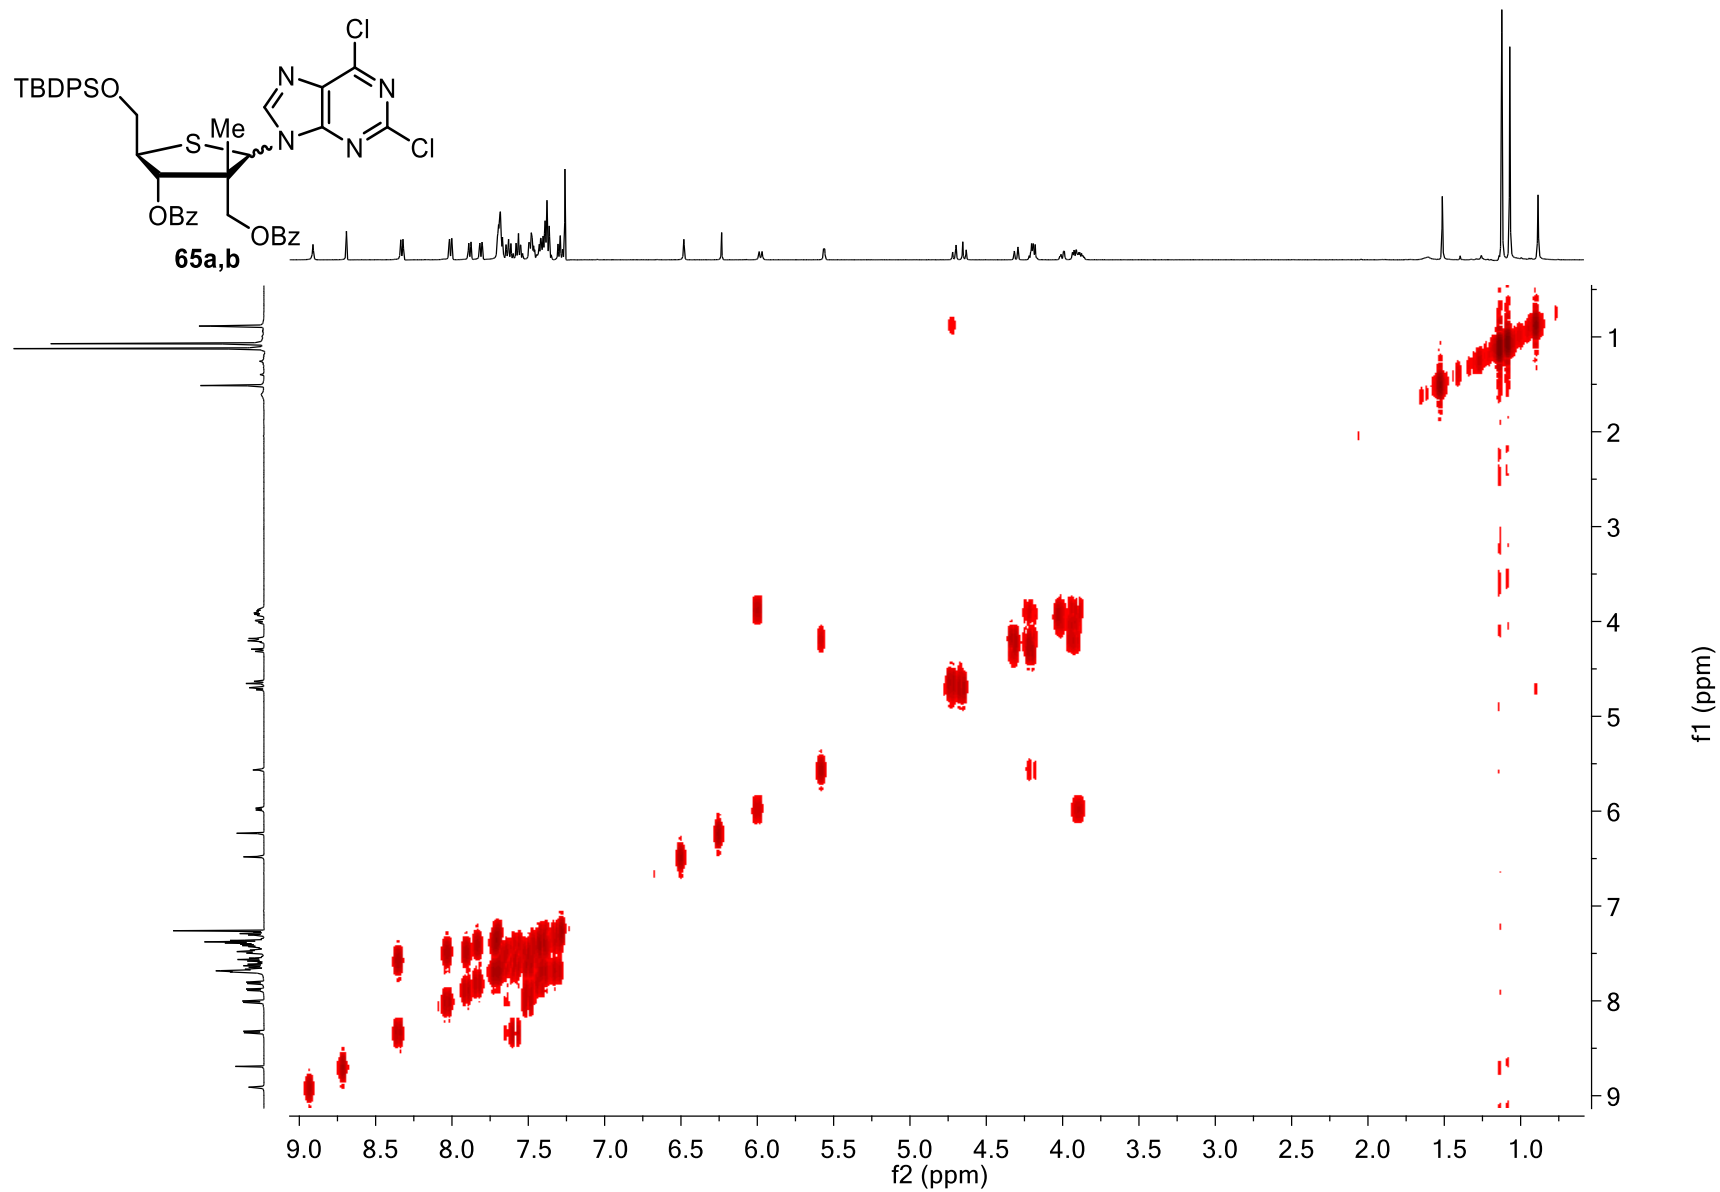

HSQC (500 MHz, CDCl<sub>3</sub>)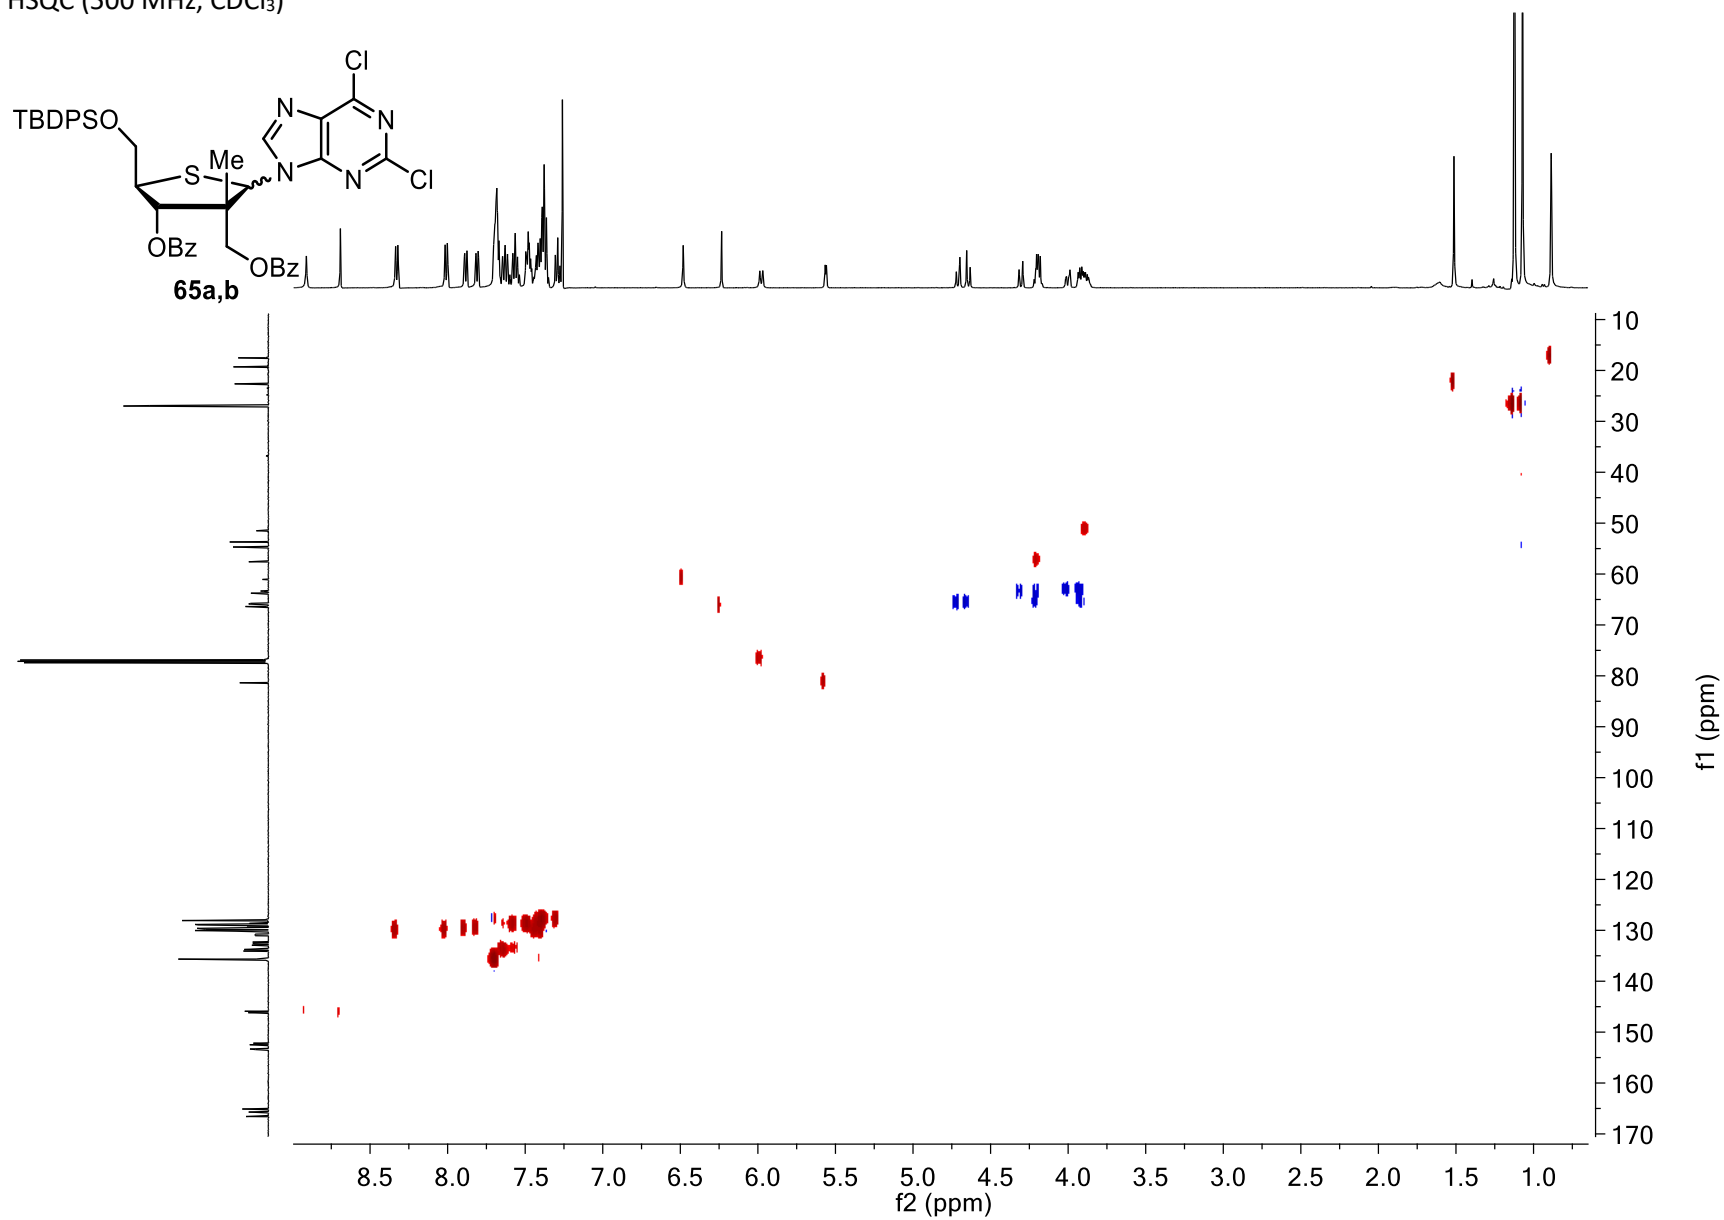

HMBC (500 MHz, CDCl<sub>3</sub>)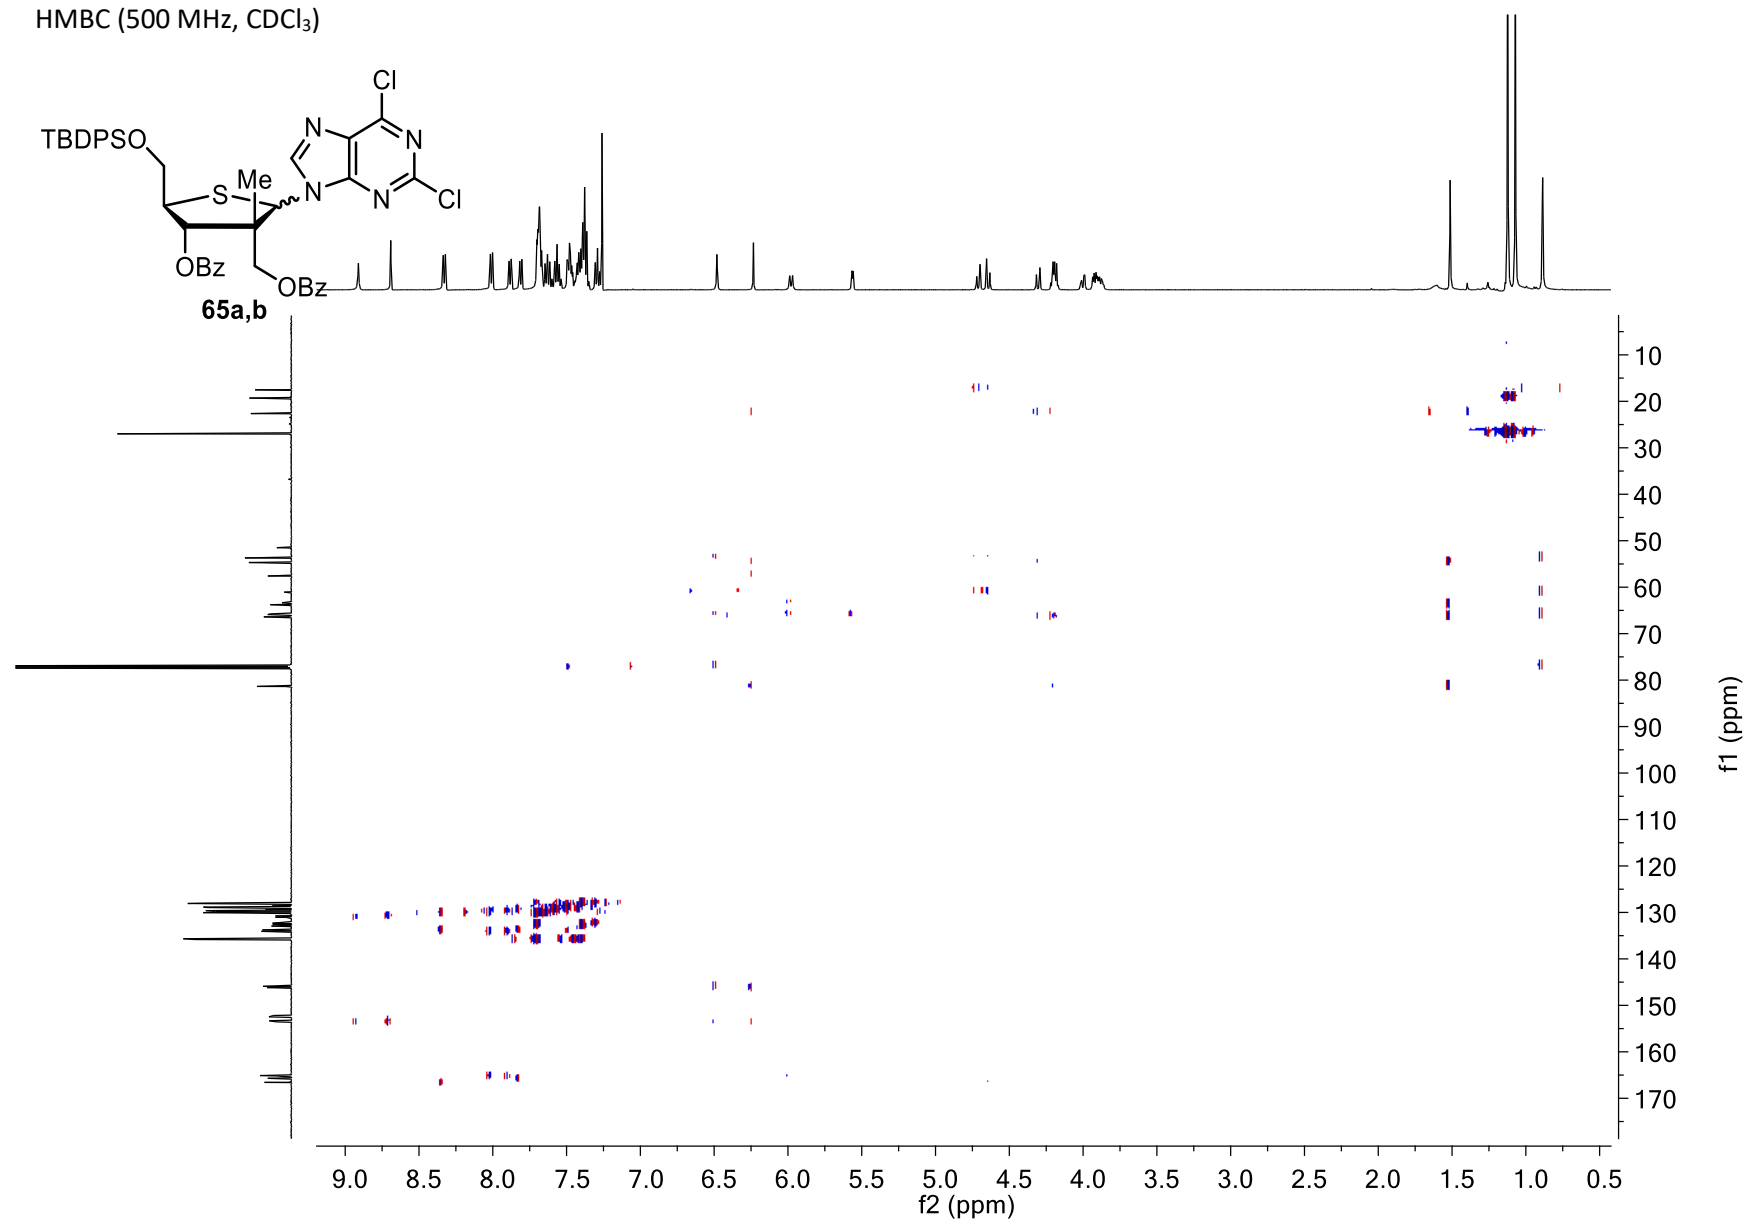



NOESY (500 MHz, CDCl<sub>3</sub>)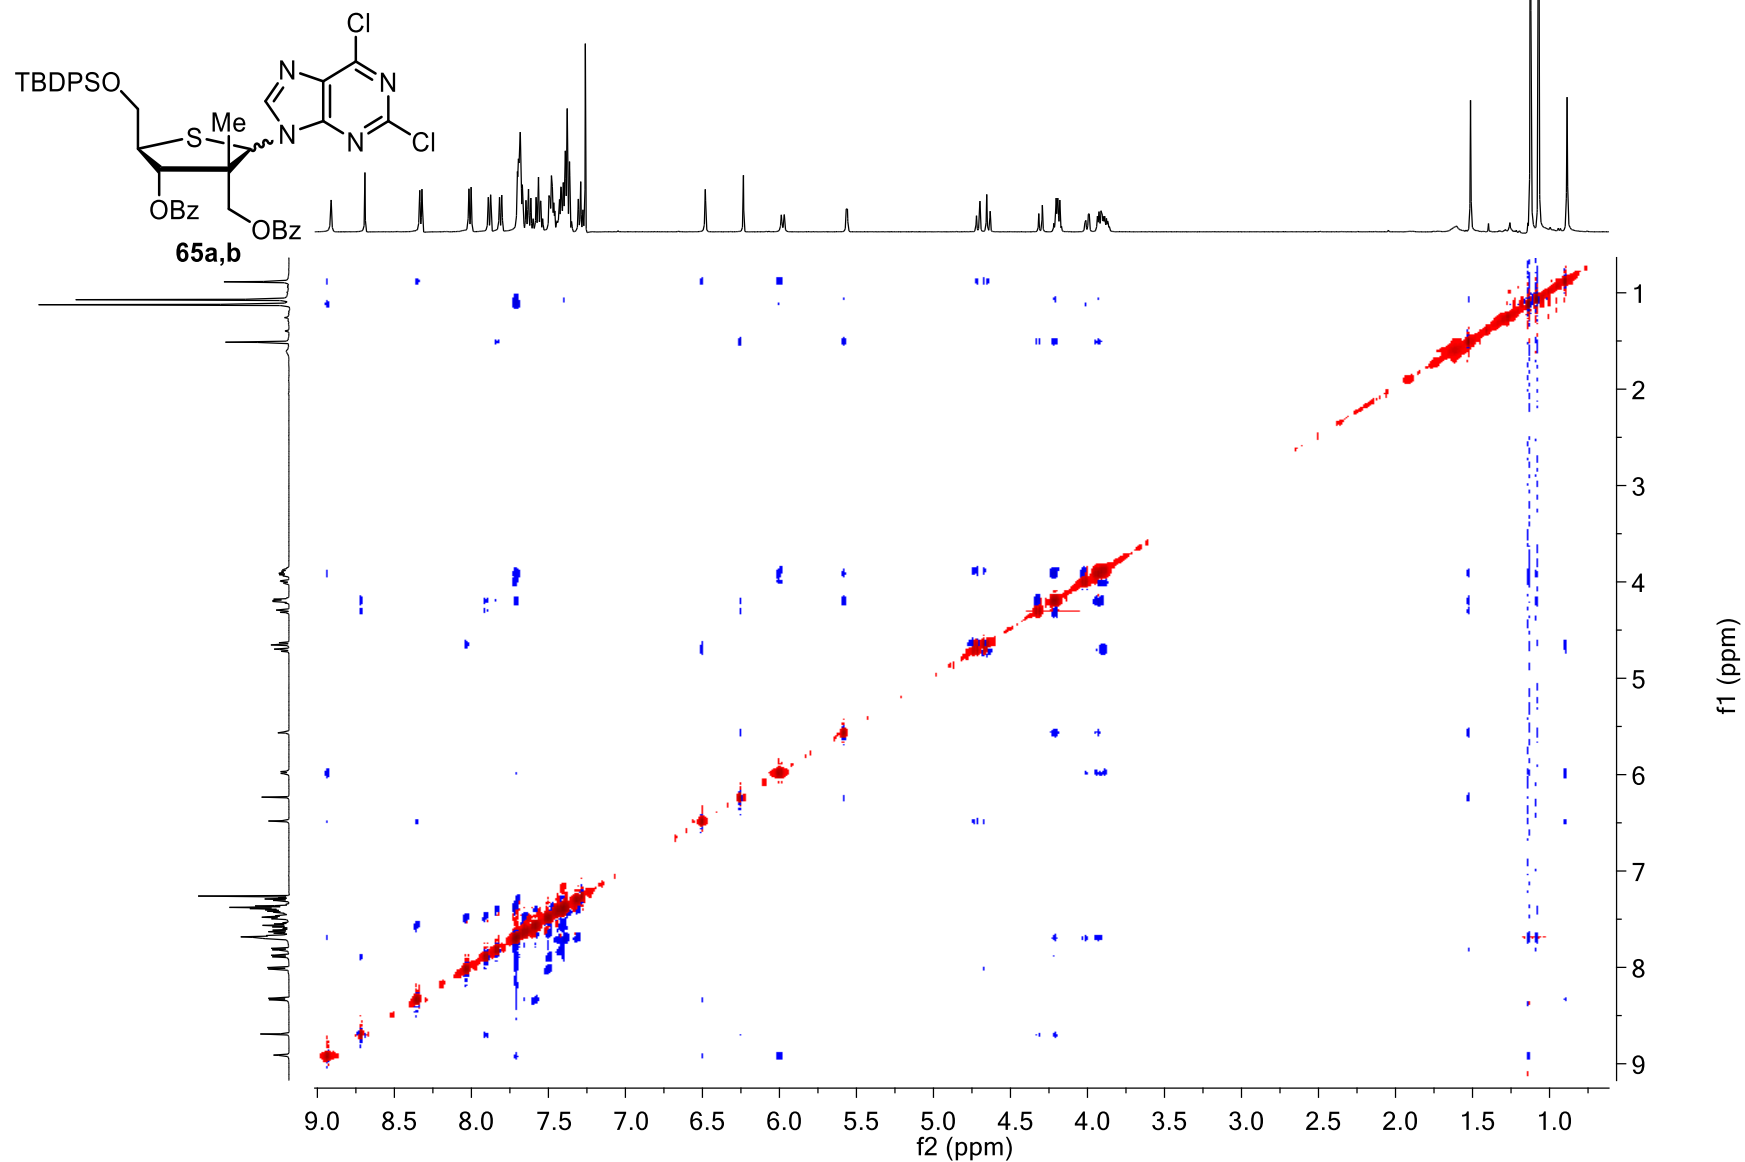

<sup>1</sup>H-NMR (500 MHz, CD<sub>3</sub>OD)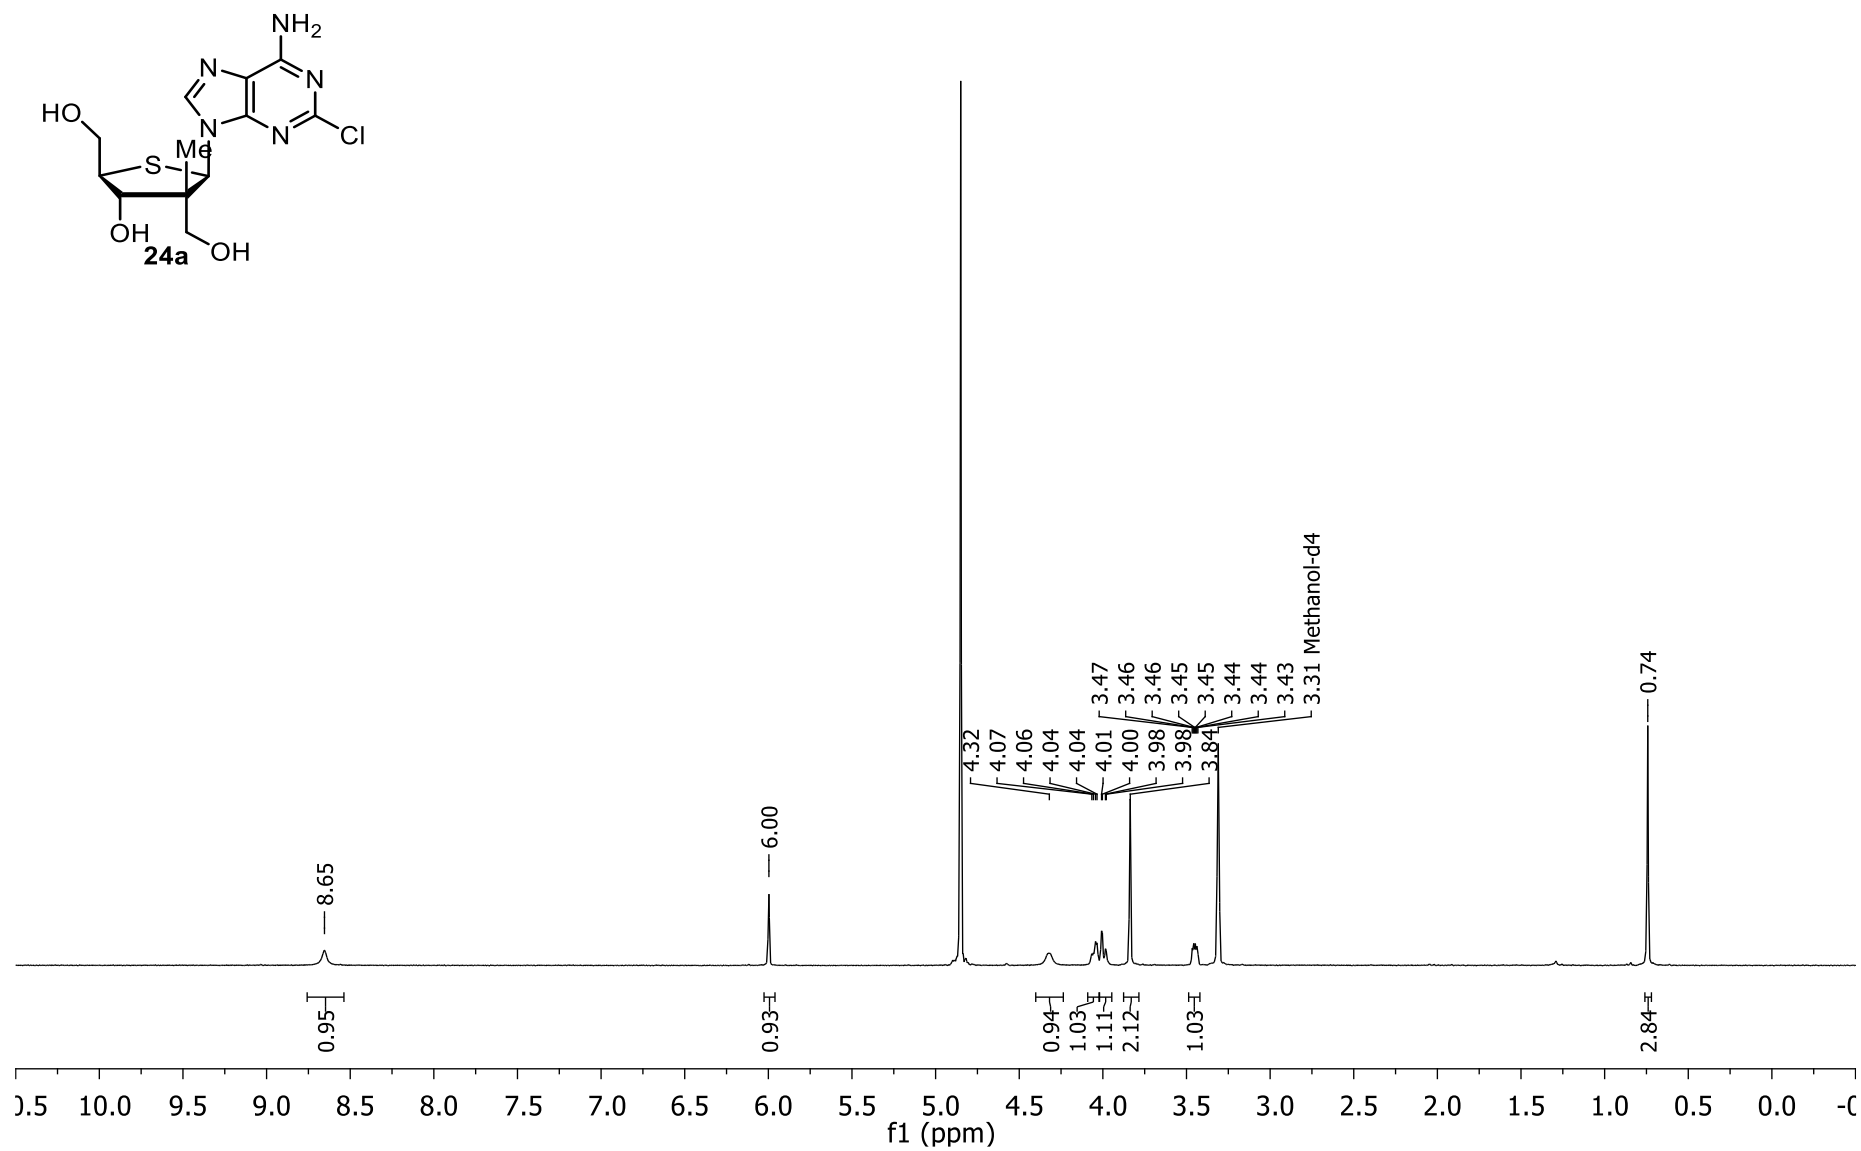

$^{13}\text{C}\{^1\text{H}\}$ -NMR (126 MHz,  $\text{CD}_3\text{OD}$ )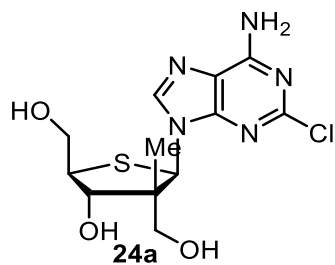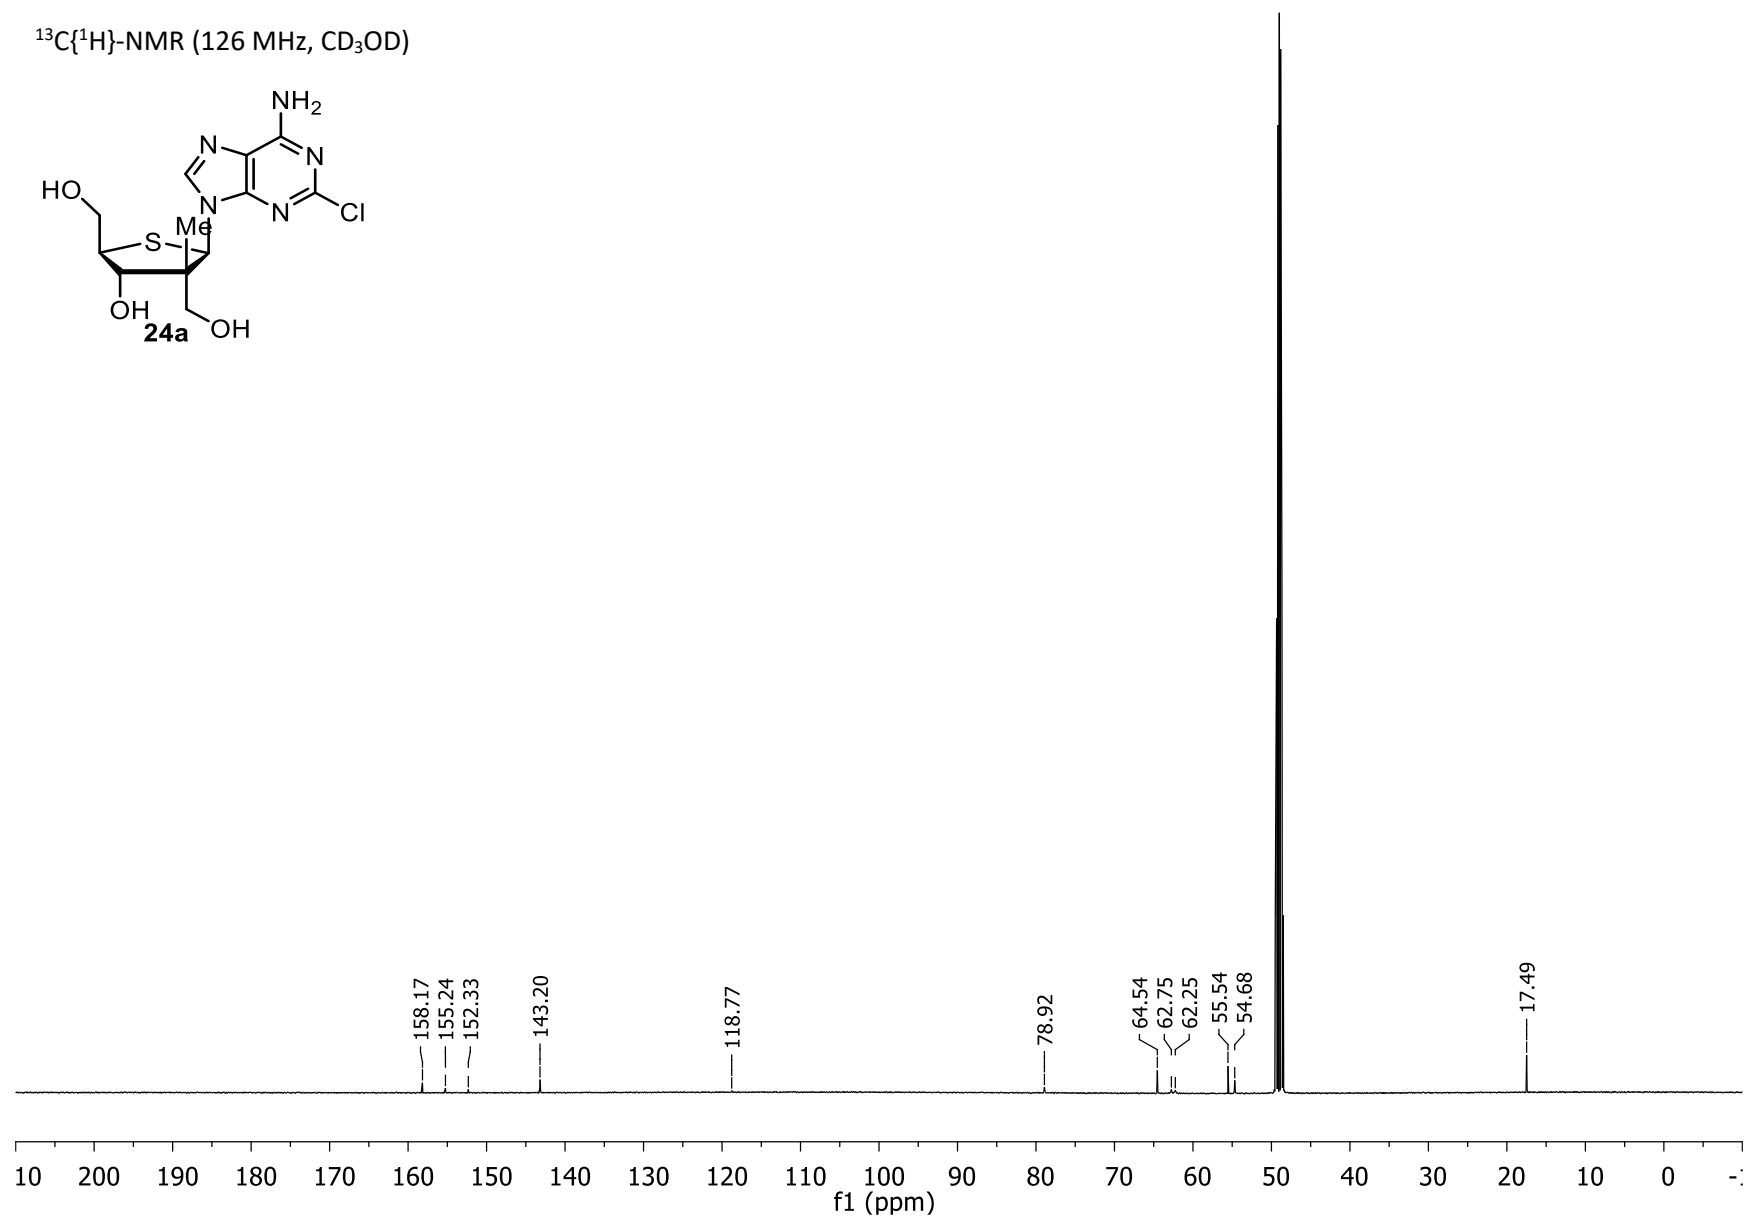

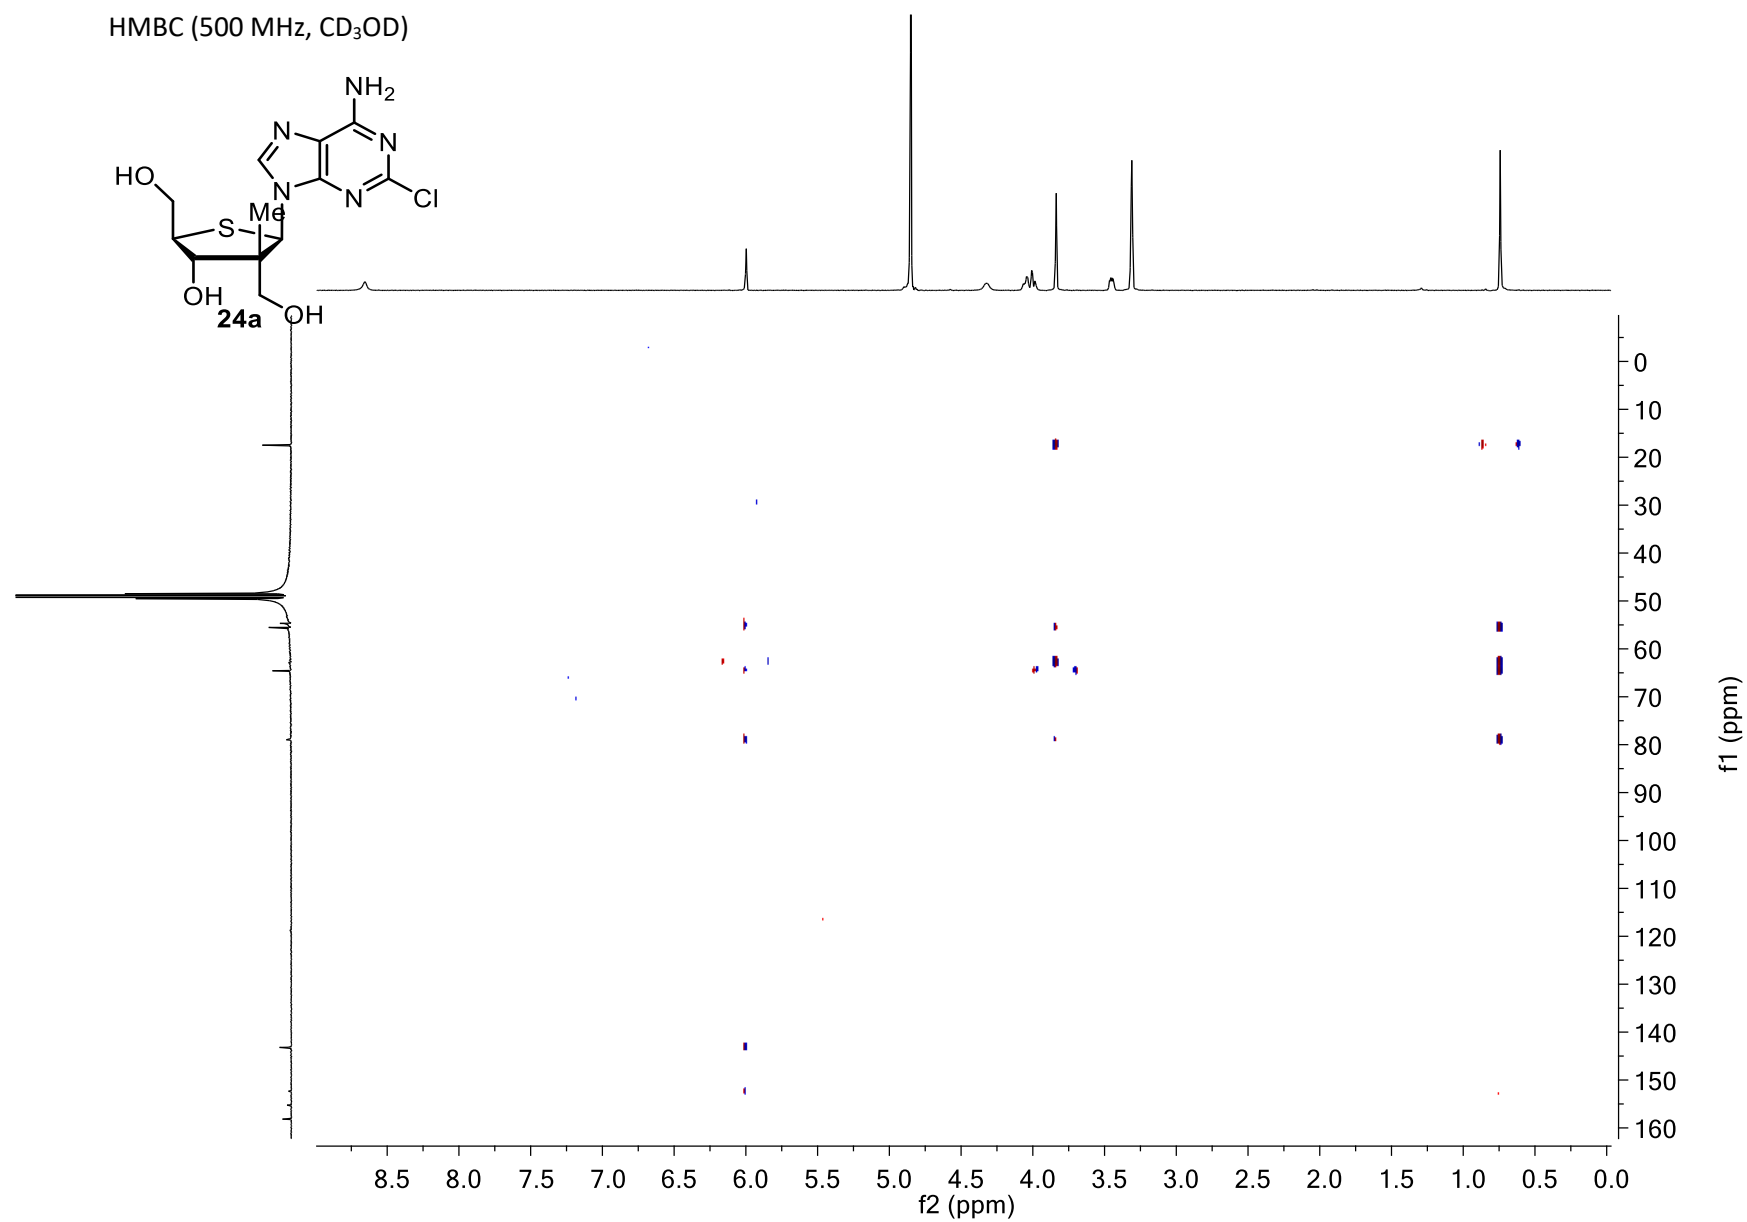

NOESY (500 MHz, CD<sub>3</sub>OD)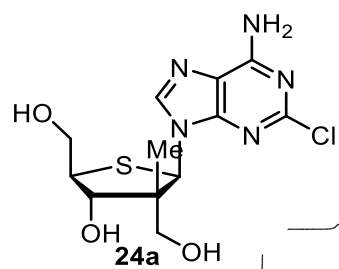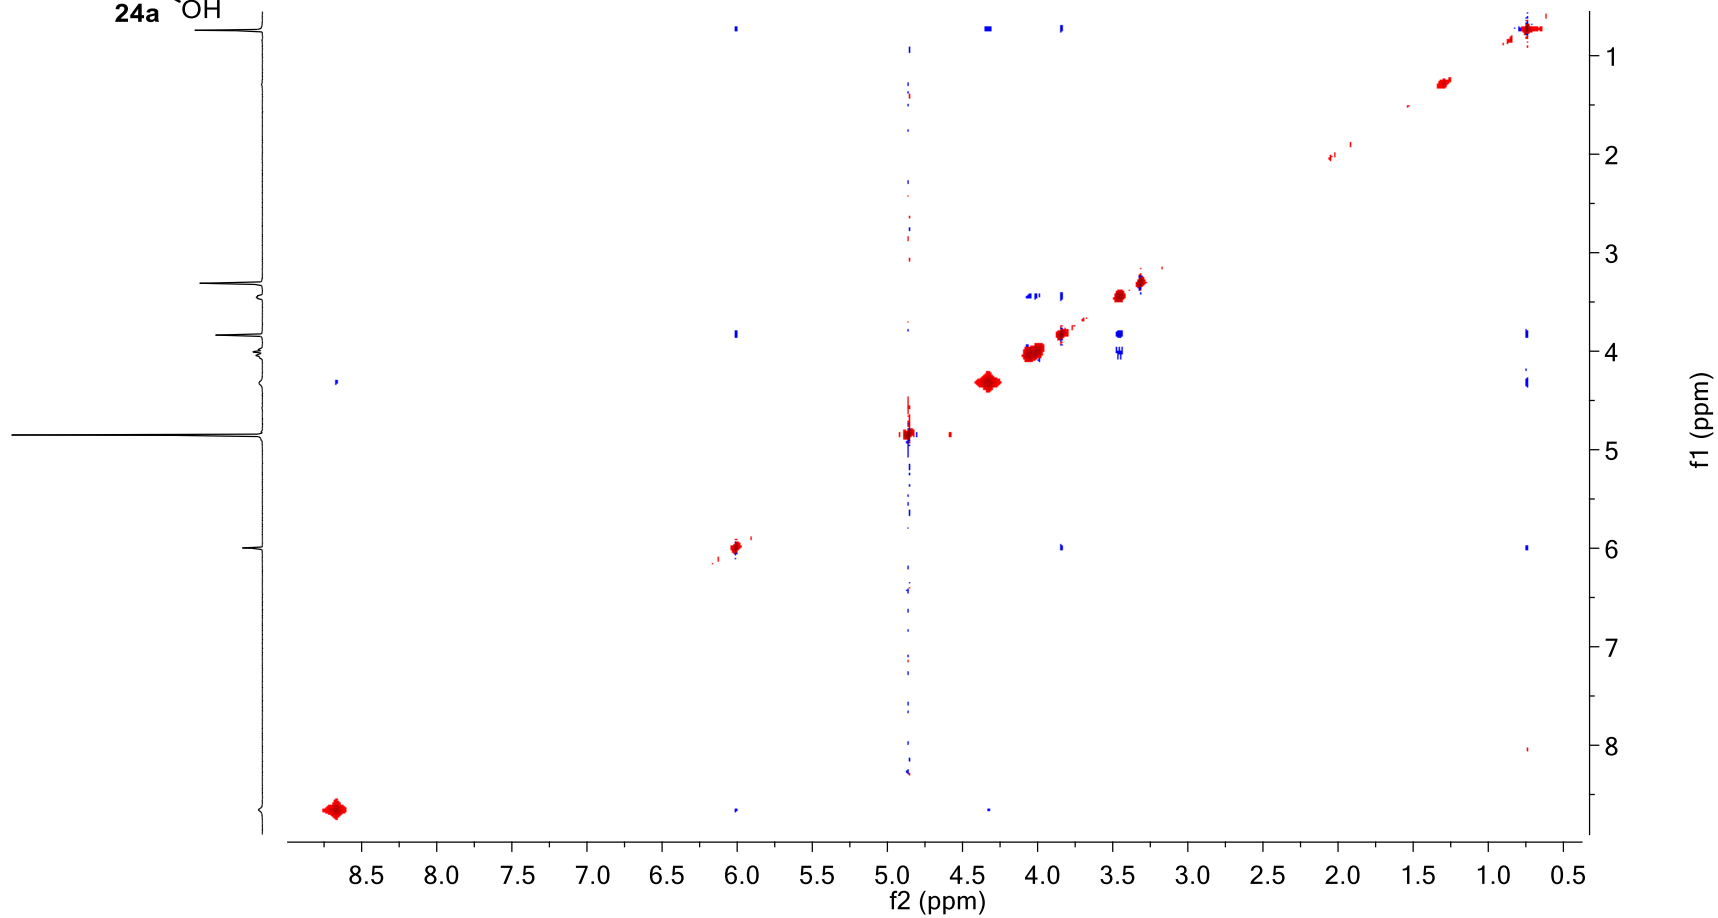

<sup>1</sup>H-NMR (500 MHz, CD<sub>3</sub>OD)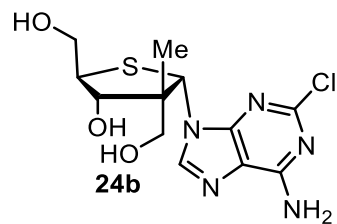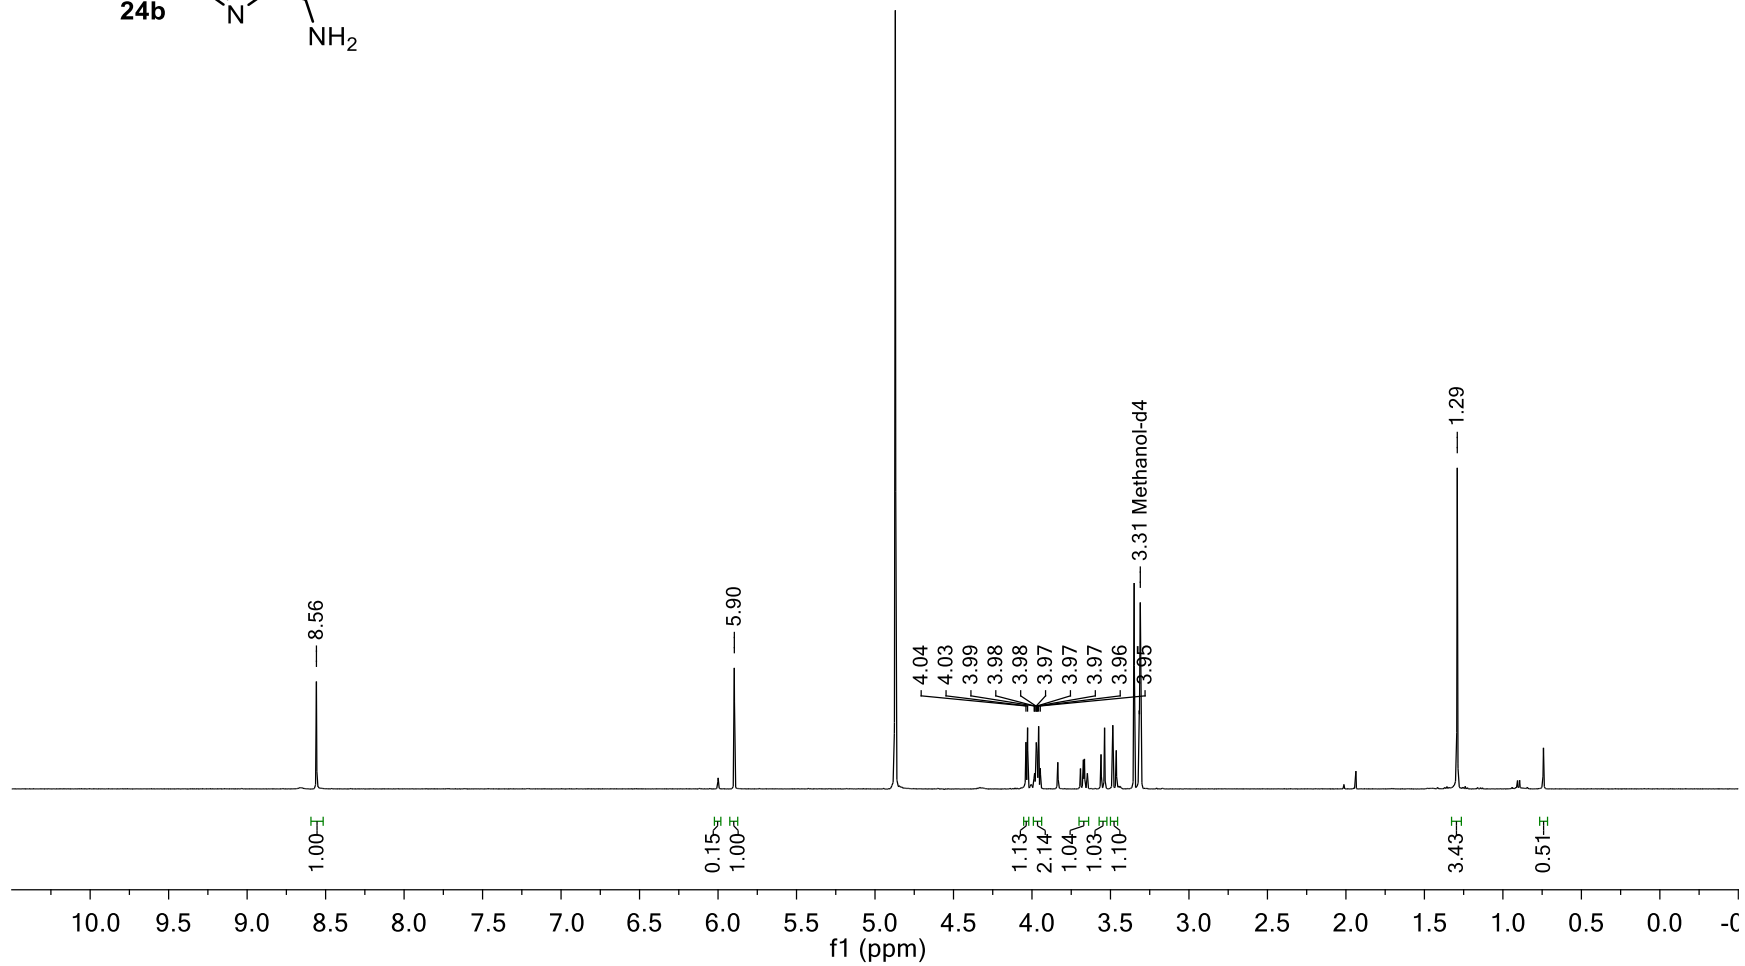

$^{13}\text{C}\{^1\text{H}\}$ -NMR (126 MHz,  $\text{CD}_3\text{OD}$ )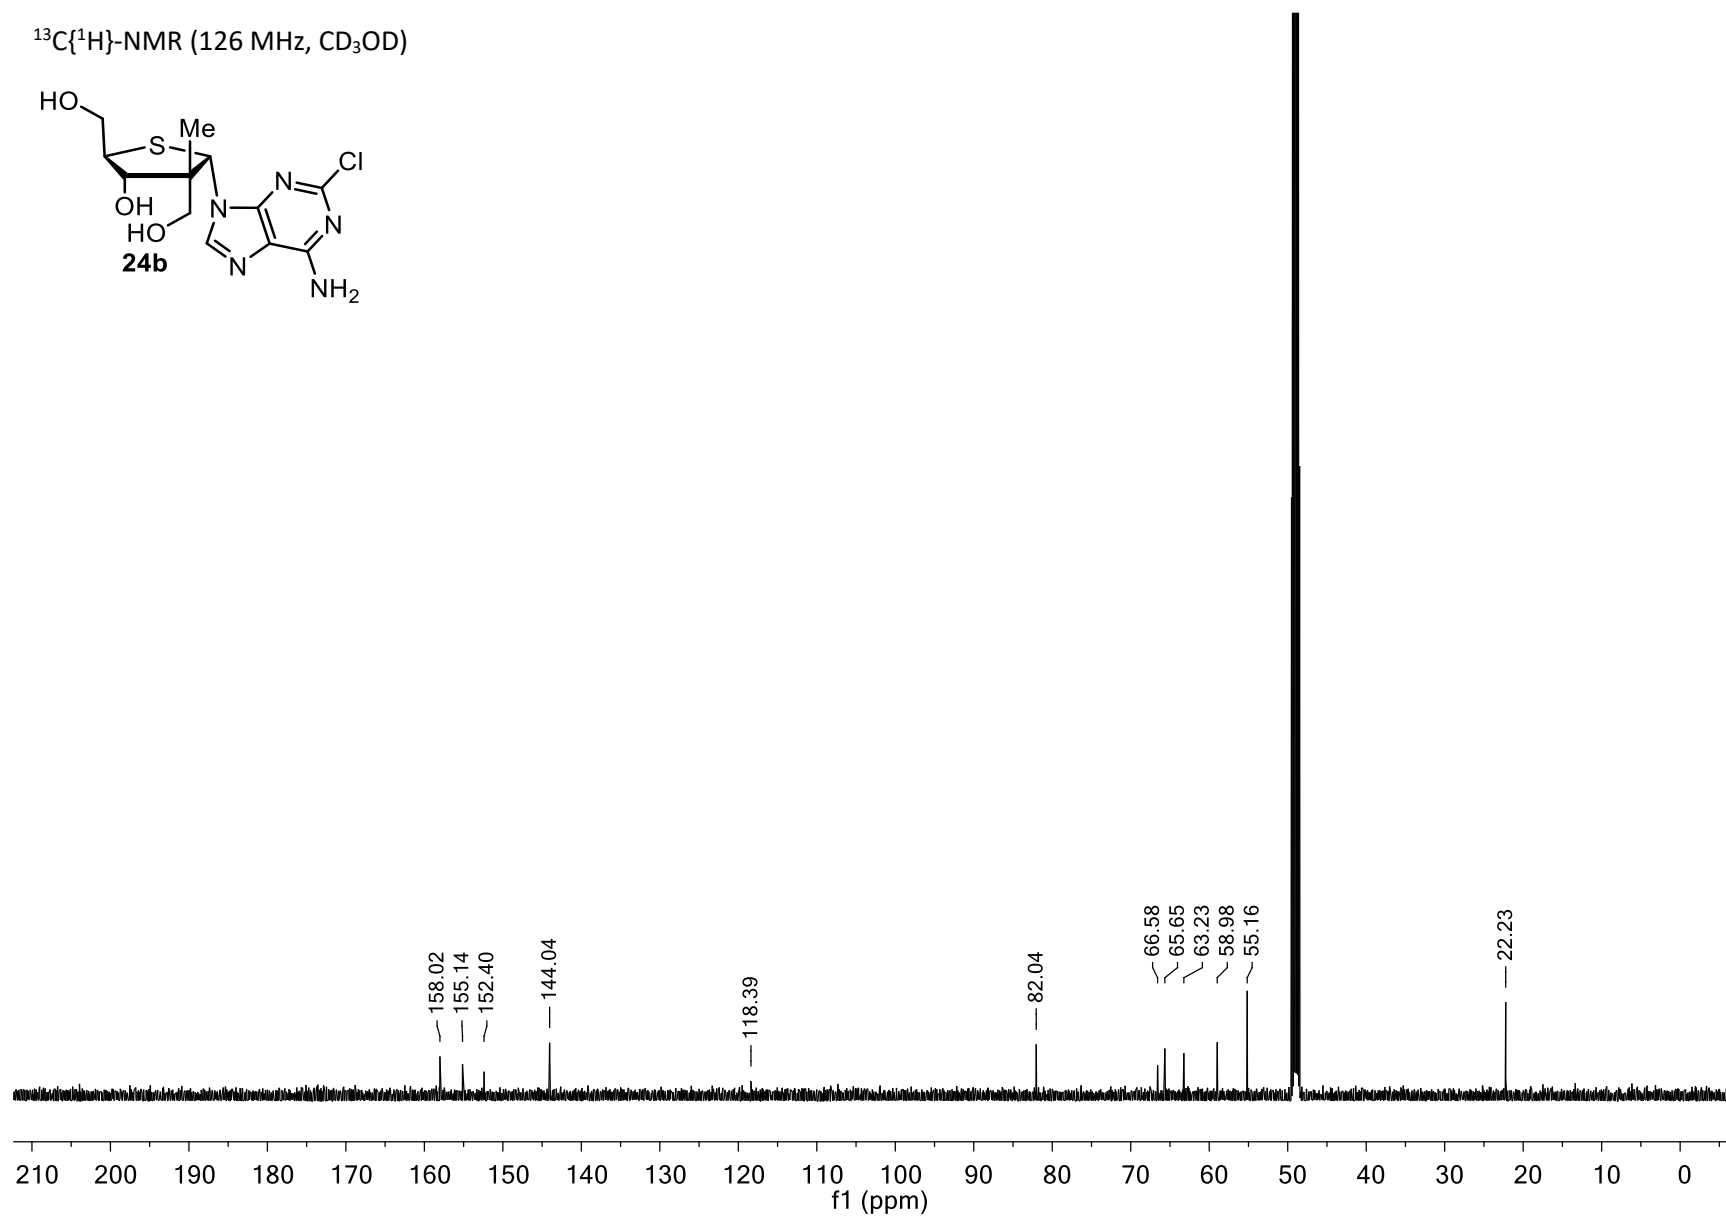

HSQC (500 MHz, CD<sub>3</sub>OD)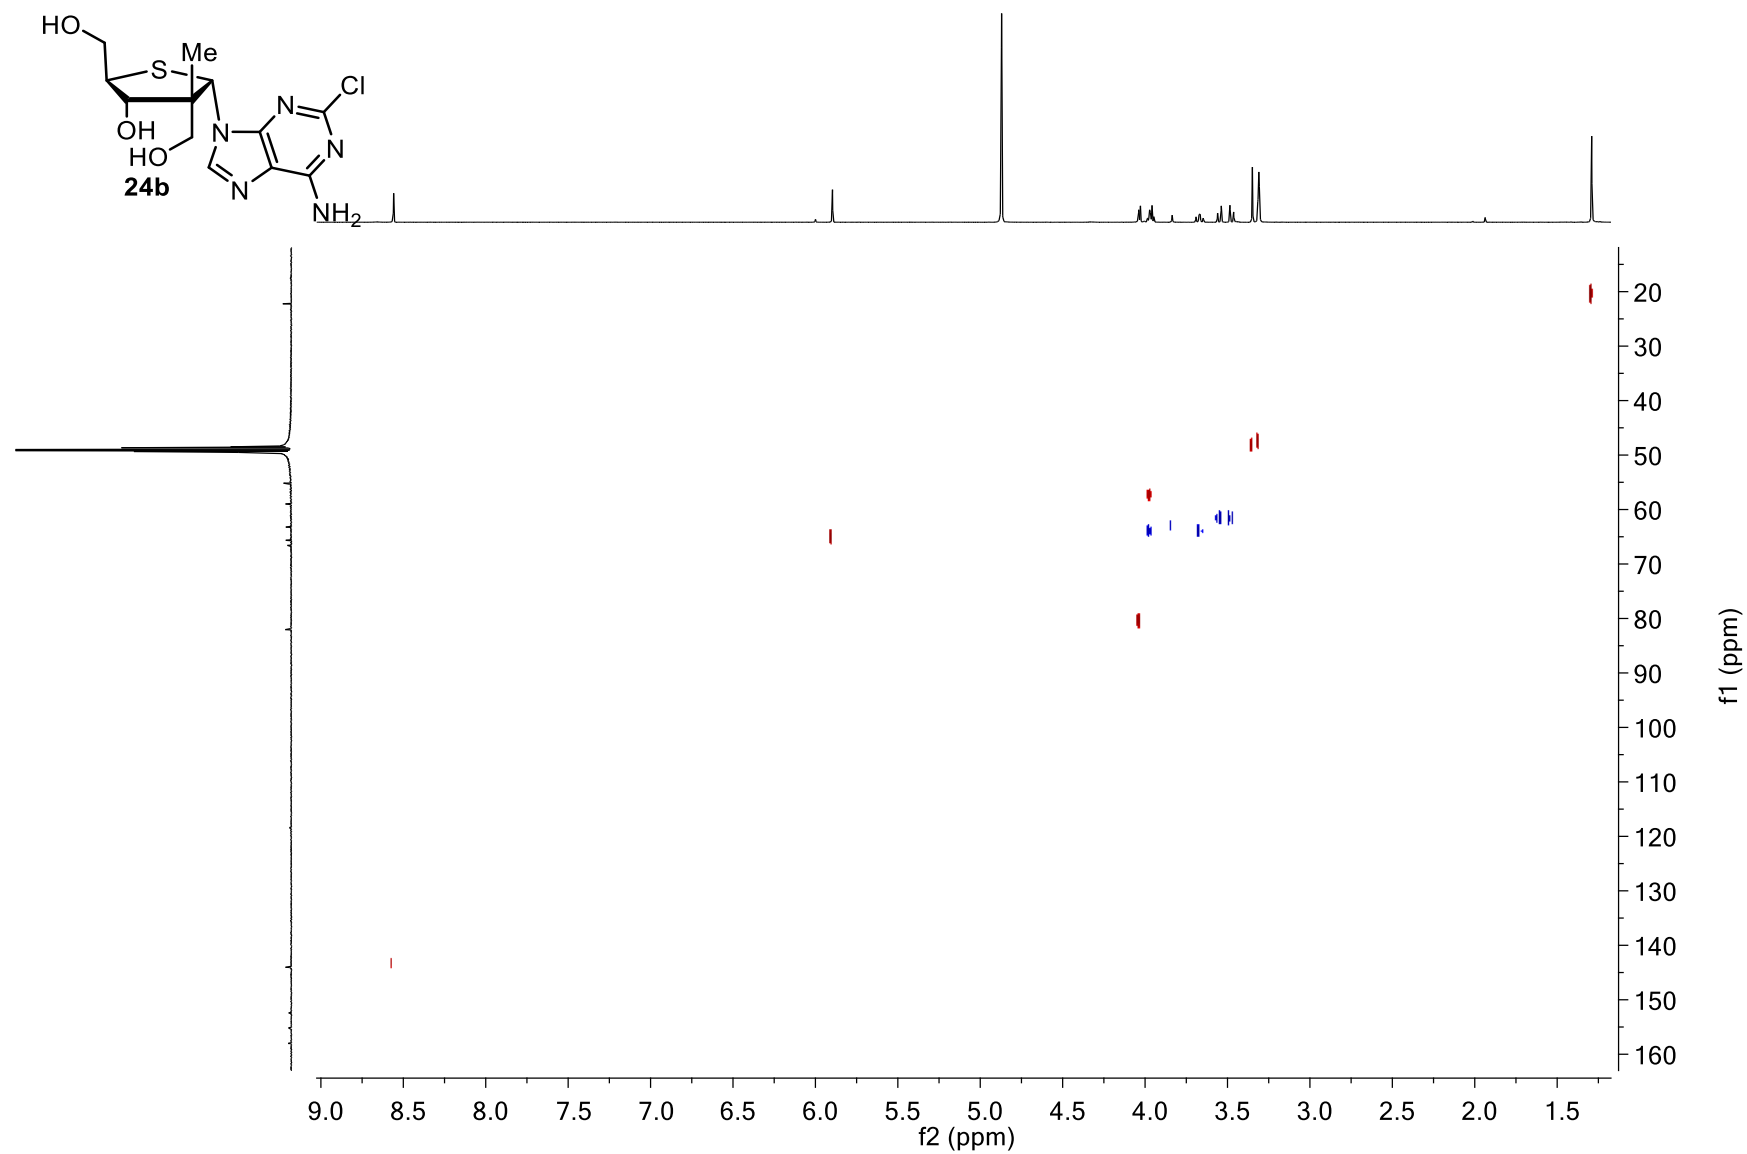



NOESY (500 MHz, CD<sub>3</sub>OD)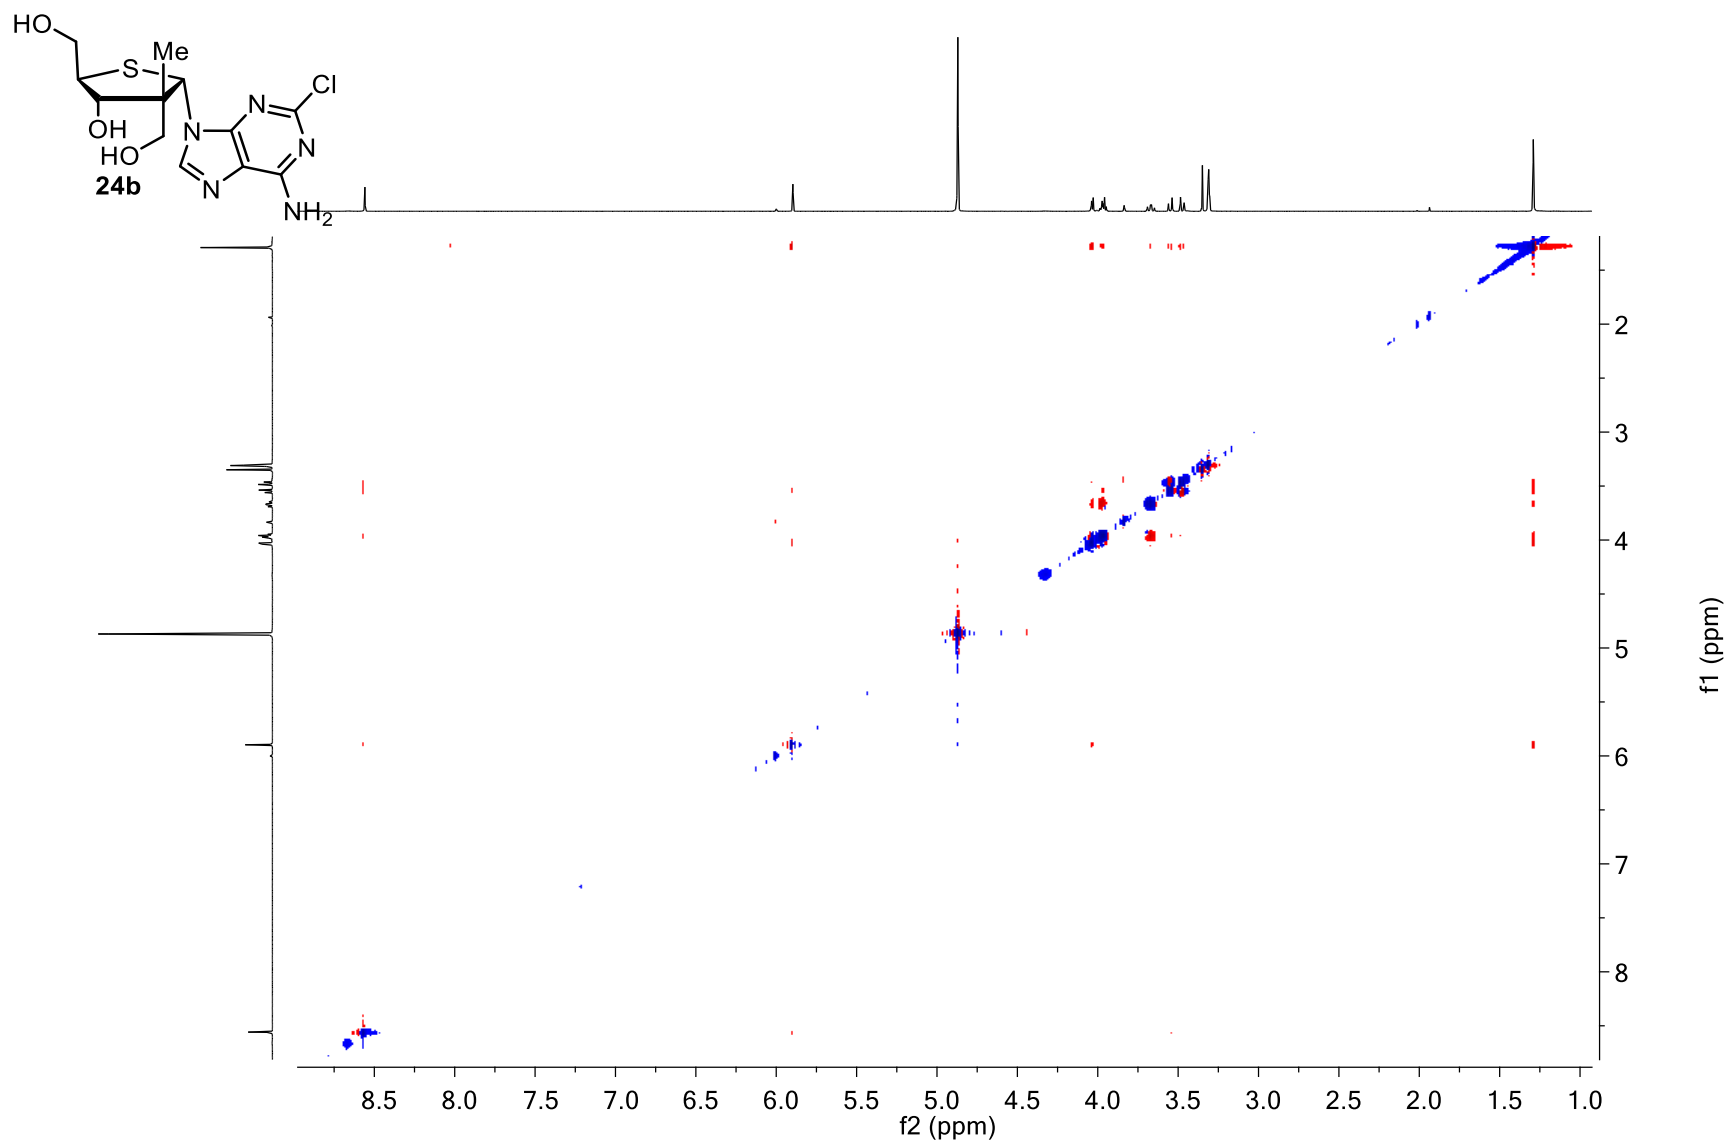

Supplement: s1 [file s1]
